# Supplementary material for: Escherichia coli O157:H7 F9 Fimbriae Recognize Plant Xyloglucan and Elicit a Response in Arabidopsis thaliana
Source: MDPI journal article supplement (doi:10.3390/ijms21249720), 2020-12-19
Supplement: s1 [file s1]

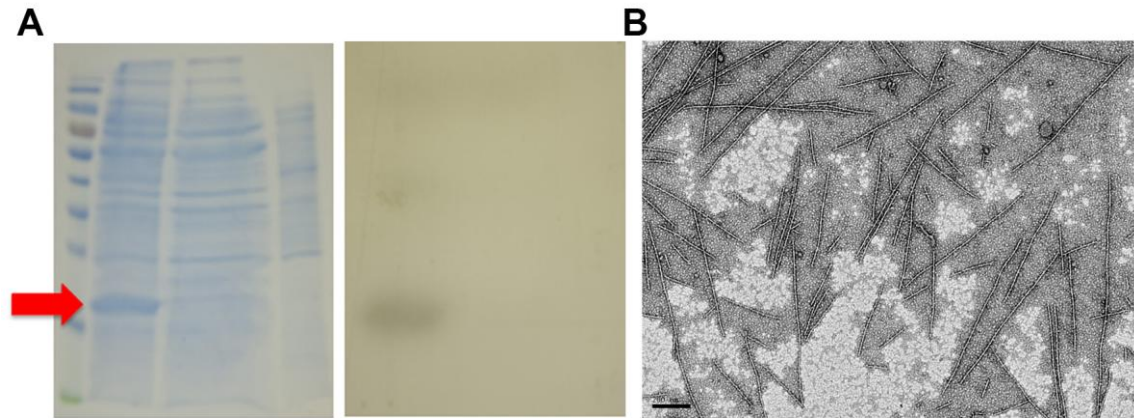

**Figure S1.** F9 fimbriae antibody specificity and electron micrograph of purified F9 fimbriae.

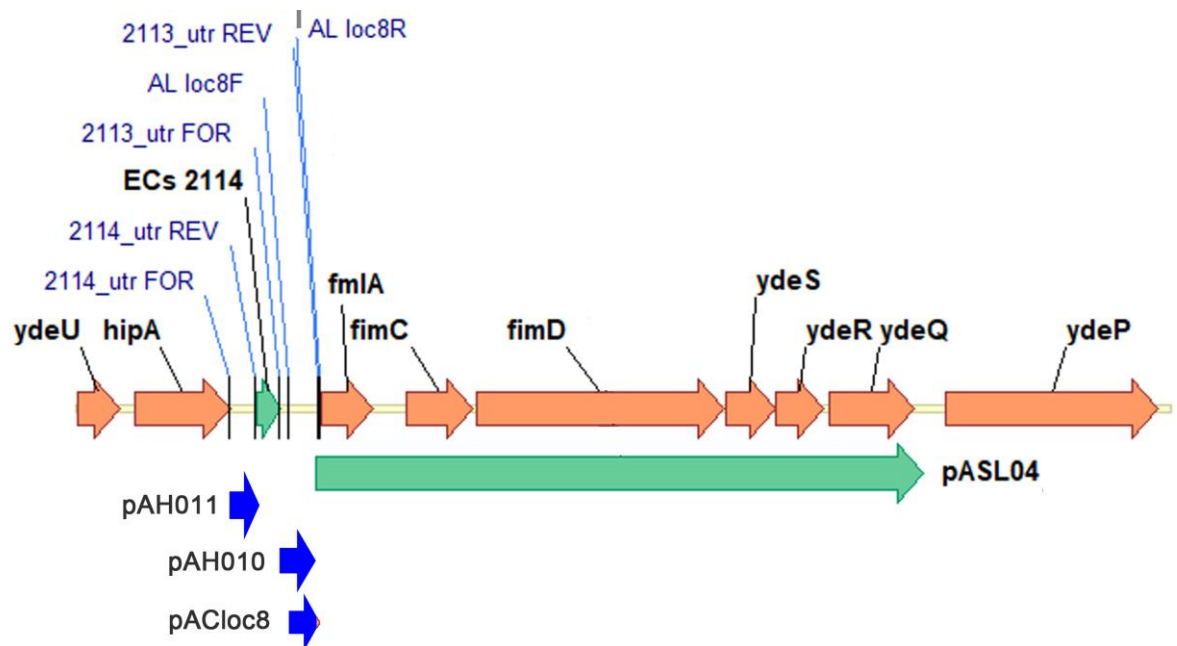

**Figure S2.** EHEC (Sakai) F9 fimbriae gene organization and reporter constructs used in this study.

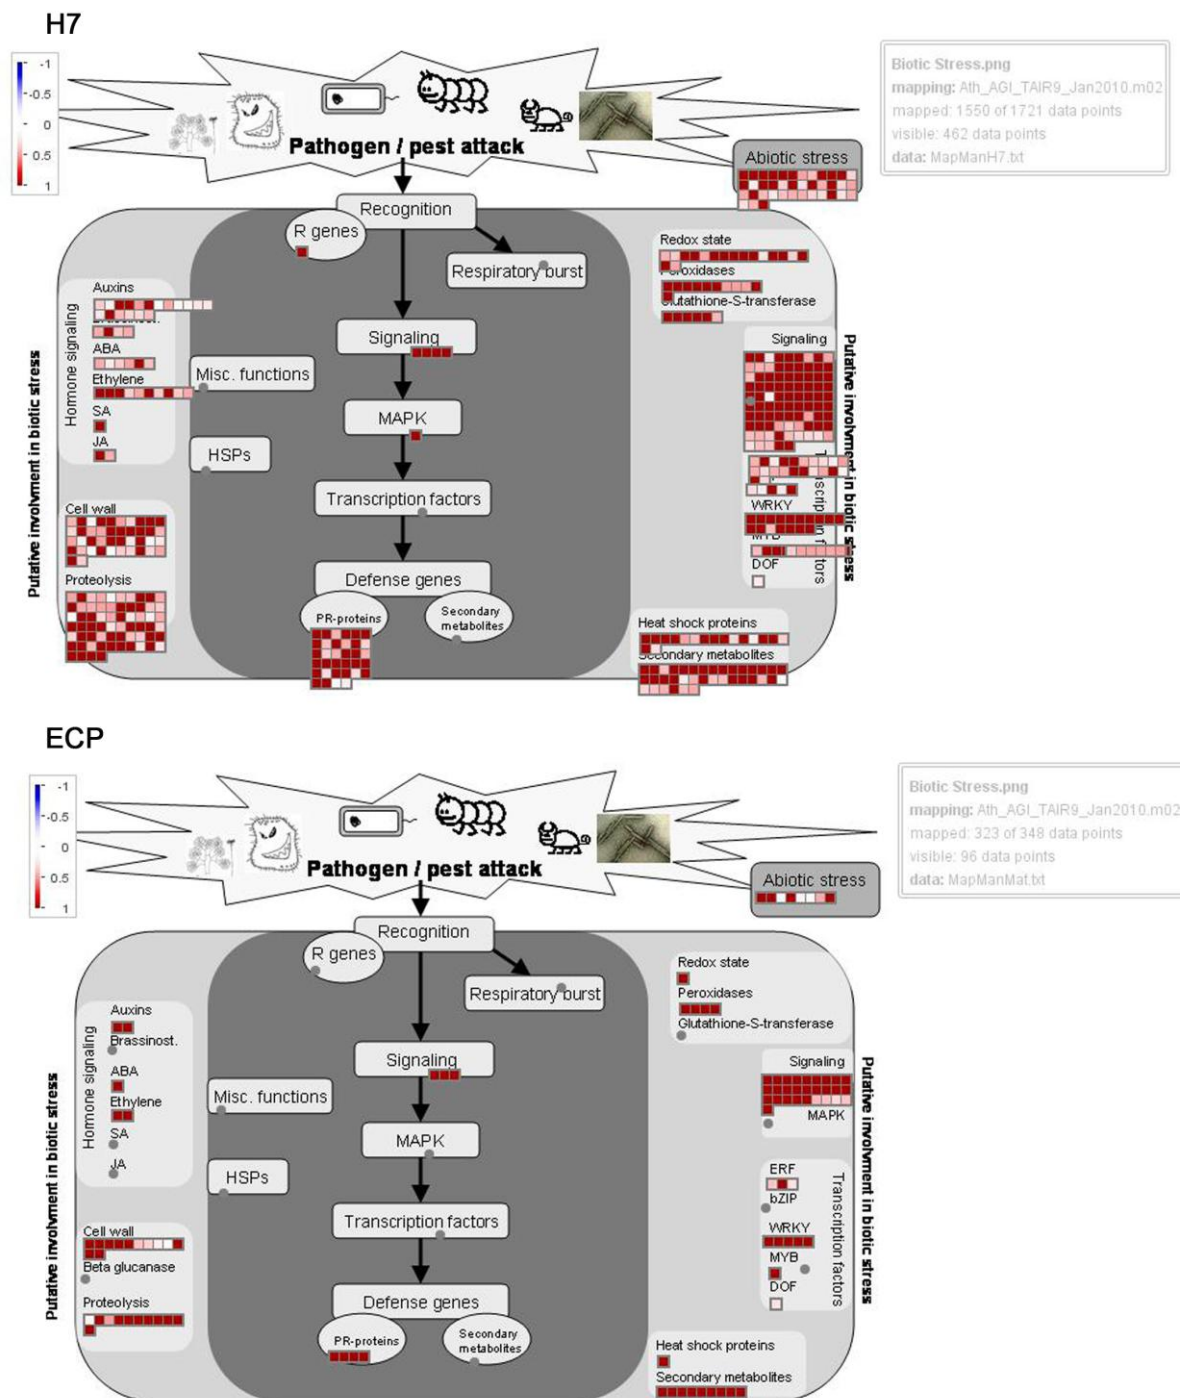

**Figure S3.** *A. thaliana* H7 flagella and ECP fimbriae responsive genes common to overall *A. thaliana* responses to biotic stress mapped by MapMan [36].
