# Supplementary material for: Escherichia coli O157:H7 F9 Fimbriae Recognize Plant Xyloglucan and Elicit a Response in Arabidopsis thaliana
Source: Int J Mol Sci. 2020 Dec 19;21(24):9720. doi: 10.3390/ijms21249720 (PMC7766294; doi:10.3390/ijms21249720)
Supplement: Supplementary file 1 [file ijms-21-09720-s001.zip]

Archive with 4 entries (4 files):
- Table S3 Comparison dataset of A. thaliana genes responsive to PAMPs from [35].xlsx
- ijms-1008624 supplementary Figure.pdf
- Table S1. List of differentially expressed A. thaliana genes in response to F9 fimbriae, H7 flagella and ECP fimbriae., .xlsx
- Table S2 Comparison dataset of A. thaliana genes responsive to E. coli DH5α from [34].xlsx
