# Supplementary material for: Escherichia coli O157:H7 F9 Fimbriae Recognize Plant Xyloglucan and Elicit a Response in Arabidopsis thaliana
Source: Int J Mol Sci. 2020 Dec 19;21(24):9720. doi: 10.3390/ijms21249720 (PMC7766294; doi:10.3390/ijms21249720)
Supplement: Supplementary file 1 [file ijms-21-09720-s001.zip › Table S1. List of differentially expressed A. thaliana genes in response to F9 fimbriae, H7 flagella and ECP fimbriae., .xlsx]

## Sheet: probes
		Fold change (log2)
Probe Namw	F9	H7	ECP	Description	TIGRID	PrimaryAccession
A_84_P787143		1.62391		28937 Lambda-PRL2 Arabidopsis thaliana cDNA clone 92L5XP 3', mRNA sequence [AA586288]		AA586288
A_84_P856262	1.13234	1.28359	1.33468	NM_180828 WR3 {Arabidopsis thaliana} (exp=-1; wgp=0; cg=0), partial (37%) [TC310366]	TC310366	AI994784
A_84_P794137		1.13395		Arabidopsis thaliana partial mRNA, clone DiDi 10A-2a [AJ276737]		AJ276737
A_84_P795693		-2.06445		Arabidopsis thaliana mRNA for hypothetical protein, complete cds, clone: RAFL25-11-N12 [AK222207]		AK222207
A_84_P786217	-1.7031			Arabidopsis thaliana mRNA for pectinesterase like protein, complete cds, clone: RAFL07-50-M01 [AK226672]		AK226672
A_84_P796587		1.98184		Arabidopsis thaliana mRNA for hypothetical protein, complete cds, clone: RAFL15-15-H09 [AK228504]	TC297671	AK228504
A_84_P803735			1.9782	Arabidopsis thaliana mRNA for hypothetical protein, complete cds, clone: RAFL16-01-O21 [AK228663]		AK228663
A_84_P731515		1.13357		Arabidopsis thaliana mRNA for putative cyclic nucleotide-regulated ion channel protein, complete cds, clone: RAFL16-72-D10 [AK229427]	TC305373	AK229427
A_84_P789383			1.801	Arabidopsis thaliana mRNA for hypothetical protein, complete cds, clone: RAFL22-20-D23 [AK229890]		AK229890
A_84_P713101		-1.25137		Arabidopsis thaliana mRNA for xyloglucan endotransglycosylase - like protein, complete cds, clone: RAFL23-12-F19 [AK230242]	TC312377	AK230242
A_84_P231009			-1.02481	nodulin MtN21 family protein [AT1G01070.1]	NP184440	AT1G01070.1
A_84_P17366		-1.61724		AP2 domain-containing transcription factor, putative [AT1G01250.1]	TC292230	AT1G01250.1
A_84_P816097		-1.07726		similar to unknown protein [Arabidopsis thaliana] (TAIR:AT4G01026.1); similar to hypothetical protein [Arabidopsis suecica] (GB:BAF63139.1); contains domain SSF55961 (SSF55961) [AT1G01360.1]	TC307711	AT1G01360.1
A_84_P10396		1.6808		ATPIPK11; 1-phosphatidylinositol-4-phosphate 5-kinase [AT1G01460.1]	NP222400	AT1G01460.1
A_84_P22852		-1.0777		myb family transcription factor [AT1G01520.1]	TC291802	AT1G01520.1
A_84_P15122		-1.20344		protein kinase family protein [AT1G01540.1]	TC302178	AT1G01540.1
A_84_P533719	-1.29939	-1.13338		fringe-related protein [AT1G01570.1]	NP222409	AT1G01570.1
A_84_P17960		-1.10646		FRO2 (FERRIC REDUCTION OXIDASE 2); ferric-chelate reductase [AT1G01580.1]	NP222410	AT1G01580.1
A_84_P21744		-1.61999		PIP1C (PLASMA MEMBRANE INTRINSIC PROTEIN 1;3); water channel [AT1G01620.1]	TC300399	AT1G01620.1
A_84_P805324		-1.70994		PIP1C (PLASMA MEMBRANE INTRINSIC PROTEIN 1;3); water channel [AT1G01620.1]	TC300399	AT1G01620.1
A_84_P805272		-1.03317		PIP1C (PLASMA MEMBRANE INTRINSIC PROTEIN 1;3); water channel [AT1G01620.1]	TC306863	AT1G01620.1
A_84_P11247		-1.20038		U-box domain-containing protein [AT1G01660.1]	NP281101	AT1G01660.1
A_84_P15034		-1.06873		KEA1 (K EFFLUX ANTIPORTER 1); potassium:hydrogen antiporter [AT1G01790.1]	TC282819	AT1G01790.1
A_84_P20862		1.76426		zinc finger (C2H2 type) family protein [AT1G02030.1]	TC292614	AT1G02030.1
A_84_P275920		4.71027		SPL8 (SQUAMOSA PROMOTER BINDING PROTEIN-LIKE 8); DNA binding [AT1G02065.1]	TC288709	AT1G02065.1
A_84_P788852			1.49692	similar to zinc ion binding [Arabidopsis thaliana] (TAIR:AT3G60520.1); similar to unknown [Populus trichocarpa] (GB:ABK95332.1) [AT1G02070.1]	TC296754	AT1G02070.1
A_84_P868722		1.11609		FUS5 (FUSCA 5); MAP kinase kinase [AT1G02090.3]	TC313430	AT1G02090.3
A_84_P847367	-1.71779			CER1 (ECERIFERUM 1) [AT1G02205.1]	TC299248	AT1G02205.1
A_84_P17015		-1.05622		HFR1 (LONG HYPOCOTYL IN FAR-RED); DNA binding / transcription factor [AT1G02340.1]	TC288418	AT1G02340.1
A_84_P17961		-1.15859		protoporphyrinogen oxidase-related [AT1G02350.1]		AT1G02350.1
A_84_P18907		3.17056		chitinase, putative [AT1G02360.1]	TC292418	AT1G02360.1
A_84_P274650		3.28783		ATARFD1B (ADP-ribosylation factor D1B); GTP binding [AT1G02430.1]	NP232808	AT1G02430.1
A_84_P24094		2.45212		ATARFD1A (ADP-ribosylation factor D1A); GTP binding [AT1G02440.1]		AT1G02440.1
A_84_P298474		2.47369		PGP11 (P-GLYCOPROTEIN 11); ATPase, coupled to transmembrane movement of substances [AT1G02520.1]	TC298212	AT1G02520.1
A_84_P612806		3.52759		similar to unknown protein [Arabidopsis thaliana] (TAIR:AT2G47360.1); similar to unnamed protein product [Vitis vinifera] (GB:CAO40120.1) [AT1G02570.1]		AT1G02570.1
A_84_P249675		-1.39252		similar to unknown protein [Arabidopsis thaliana] (TAIR:AT4G02140.1); similar to hypothetical protein [Vitis vinifera] (GB:CAN70483.1); similar to unnamed protein product [Vitis vinifera] (GB:CAO40074.1) [AT1G02700.1]	TC293022	AT1G02700.1
A_84_P17111	-1.33651			late embryogenesis abundant 3 family protein / LEA3 family protein [AT1G02820.1]	TC296923	AT1G02820.1
A_84_P14250		-1.97901		glutamate binding / [AT1G03070.1]	TC293495	AT1G03070.1
A_84_P21773	-1.45086			POR C (PROTOCHLOROPHYLLIDE OXIDOREDUCTASE); NADPH dehydrogenase/ oxidoreductase/ protochlorophyllide reductase [AT1G03630.1]	TC286236	AT1G03630.1
A_84_P15153		1.40022		similar to ankyrin repeat family protein [Arabidopsis thaliana] (TAIR:AT1G03670.1); similar to unnamed protein product [Vitis vinifera] (GB:CAO23951.1); contains domain ANK REPEAT-CONTAINING (PTHR18958:SF80); contains domain ANKYRIN REPEAT-CONTAINING (PTHR18958) [AT1G03660.1]	NP226324	AT1G03660.1
A_84_P13263	-1.48078			cysteine protease inhibitor [AT1G03710.1]	NP226318	AT1G03710.1
A_84_P823929		2.48059		glutaredoxin family protein [AT1G03850.1]	TC300805	AT1G03850.1
A_84_P564716		2.24685		glutaredoxin family protein [AT1G03850.1]		AT1G03850.1
A_84_P17031		2.40569		glutaredoxin family protein [AT1G03850.2]	TC295579	AT1G03850.2
A_84_P19909		-2.49437		flavin-containing monooxygenase family protein / FMO family protein [AT1G04180.1]	NP041958	AT1G04180.1
A_84_P21812		-1.83406		SHY2 (SHORT HYPOCOTYL 2); transcription factor [AT1G04240.1]	TC290710	AT1G04240.1
A_84_P20866		-1.43212		AXR3 (AUXIN RESISTANT 3); transcription factor [AT1G04250.1]	TC289919	AT1G04250.1
A_84_P838052		-1.52923		AXR3 (AUXIN RESISTANT 3); transcription factor [AT1G04250.1]	TC308106	AT1G04250.1
A_84_P11410			3.13817	ATERF14 (ETHYLENE-RESPONSIVE ELEMENT BINDING FACTOR 14); DNA binding / transcription factor [AT1G04370.1]	TC305402	AT1G04370.1
A_84_P18219		-1.03433		male sterility MS5 family protein [AT1G04770.1]	TC290321	AT1G04770.1
A_84_P17059		-1.00083		EMB2394 (EMBRYO DEFECTIVE 2394); structural constituent of ribosome [AT1G05190.1]	TC290953	AT1G05190.1
A_84_P795935		-1.11547		EMB2394 (EMBRYO DEFECTIVE 2394); structural constituent of ribosome [AT1G05190.1]	TC290953	AT1G05190.1
A_84_P15168		1.33391		ZIP5 (ZINC TRANSPORTER 5 PRECURSOR); cation transmembrane transporter [AT1G05300.1]	TC288336	AT1G05300.1
A_84_P14223		-1.59919		pectinesterase family protein [AT1G05310.1]	TC298864	AT1G05310.1
A_84_P834353		-1.88677		pectinesterase family protein [AT1G05310.1]	TC302502	AT1G05310.1
A_84_P751853	-1.13511	-1.33368		PDE247 (PIGMENT DEFECTIVE 247) [AT1G05750.1]		AT1G05750.1
A_84_P303930	1.75861			lipase class 3 family protein [AT1G05800.1]	NP174211	AT1G05800.1
A_84_P22273		2.22055		zinc ion binding [AT1G05880.1]	NP174221	AT1G05880.1
A_84_P20410	-4.20654		-3.8392	ADS1 (DELTA 9 DESATURASE 1); oxidoreductase [AT1G06080.1]	TC291126	AT1G06080.1
A_84_P753337		1.01202		other RNA [AT1G06148.1]		AT1G06148.1
A_84_P17577		1.28529		ATMYB13 (myb domain protein 13); DNA binding / transcription factor [AT1G06180.1]	TC293553	AT1G06180.1
A_84_P592399		1.07173		ribosomal protein-related [AT1G06380.1]		AT1G06380.1
A_84_P15124	-1.70669			unknown protein [AT1G06420.1]	TC299389	AT1G06420.1
A_84_P814968		-1.03887		ACD32.1 (ALPHA-CRYSTALLIN DOMAIN 31.2) [AT1G06460.1]	TC308792	AT1G06460.1
A_84_P13942			2.08874	ATGPAT1/GPAT1 (GLYCEROL-3-PHOSPHATE ACYLTRANSFERASE 1); 1-acylglycerol-3-phosphate O-acyltransferase/ acyltransferase [AT1G06520.1]	TC282614	AT1G06520.1
A_84_P22453		1.03302		similar to unknown protein [Arabidopsis thaliana] (TAIR:AT2G30930.1) [AT1G06540.1]	TC306982	AT1G06540.1
A_84_P12050			1.05382	enoyl-CoA hydratase/isomerase family protein [AT1G06550.1]	NP173704	AT1G06550.1
A_84_P751847		-1.11427		pseudogene, similar to CmE8, blastp match of 51% identity and 3.9e-106 P-value to GP [AT1G06645.1]		AT1G06645.1
A_84_P823506		-1.12913		aldo/keto reductase family protein [AT1G06690.1]	TC303749	AT1G06690.1
A_84_P292314		-1.04566		aldo/keto reductase family protein [AT1G06690.1]	TC313339	AT1G06690.1
A_84_P17191			1.6341	protein phosphatase 2C, putative / PP2C, putative [AT1G07160.1]	NP303015	AT1G07160.1
A_84_P754636		2.94223	3.51885	similar to unknown protein [Arabidopsis thaliana] (TAIR:AT2G29995.1) [AT1G07175.1]		AT1G07175.1
A_84_P16245		2.10509		UDP-glucoronosyl/UDP-glucosyl transferase family protein [AT1G07260.1]	TC285643	AT1G07260.1
A_84_P15440		1.47803		17.8 kDa class I heat shock protein (HSP17.8-CI) [AT1G07400.1]	TC292554	AT1G07400.1
A_84_P13548	-1.3166	-1.17513		protein phosphatase 2C, putative / PP2C, putative [AT1G07430.1]	TC282954	AT1G07430.1
A_84_P18275		-1.46614		tropinone reductase, putative / tropine dehydrogenase, putative [AT1G07440.1]	TC301434	AT1G07440.1
A_84_P855048		-1.46874		tropinone reductase, putative / tropine dehydrogenase, putative [AT1G07440.1]	TC309637	AT1G07440.1
A_84_P547061		1.42951		similar to unknown protein [Arabidopsis thaliana] (TAIR:AT1G07476.1) [AT1G07473.1]		AT1G07473.1
A_84_P18271	-1.34122	-1.55687		unknown protein [AT1G07500.1]		AT1G07500.1
A_84_P13539	1.01031			APK1A (Arabidopsis protein kinase 1A); kinase [AT1G07570.1]	NP221724	AT1G07570.1
A_84_P17295		1.28464		PLL5 (POL-like 5); protein serine/threonine phosphatase [AT1G07630.1]	TC309209	AT1G07630.1
A_84_P803285		1.27964		PLL5 (POL-like 5); protein serine/threonine phosphatase [AT1G07630.1]	TC309209	AT1G07630.1
A_84_P18237		-1.62677		ankyrin repeat family protein [AT1G07710.1]	NP281074	AT1G07710.1
A_84_P829402		1.45693		similar to unknown protein [Arabidopsis thaliana] (TAIR:AT2G28725.1); similar to hypothetical protein [Vitis vinifera] (GB:CAN76818.1) [AT1G07795.1]	TC296953	AT1G07795.1
A_84_P20121		-1.76533		unknown protein [AT1G07860.1]	NP432101	AT1G07860.1
A_84_P810312		1.22829		APX1 (ASCORBATE PEROXIDASE 1); L-ascorbate peroxidase [AT1G07890.1]	TC310116	AT1G07890.1
A_84_P810322		1.12779		APX1 (ASCORBATE PEROXIDASE 1); L-ascorbate peroxidase [AT1G07890.1]	TC310116	AT1G07890.1
A_84_P143569	1.7285			bZIP family transcription factor [AT1G08320.1]	NP173616	AT1G08320.1
A_84_P298034		-1.34635		plastocyanin-like domain-containing protein [AT1G08500.1]	TC291475	AT1G08500.1
A_84_P815236		-1.1668		thioredoxin family protein [AT1G08570.3]	TC310071	AT1G08570.3
A_84_P17045		1.79315		THA1 (THREONINE ALDOLASE 1); aldehyde-lyase/ threonine aldolase [AT1G08630.1]	TC309279	AT1G08630.1
A_84_P816193		1.65719		THA1 (THREONINE ALDOLASE 1); aldehyde-lyase/ threonine aldolase [AT1G08630.1]	TC309279	AT1G08630.1
A_84_P19883	-1.13132	-1.00227		PPCK1 (PHOSPHOENOLPYRUVATE CARBOXYLASE KINASE); kinase [AT1G08650.1]	TC286472	AT1G08650.1
A_84_P815732		-1.14087		ATAMI1 (AMIDASE-LIKE PROTEIN 1); amidase [AT1G08980.1]	NP043398	AT1G08980.1
A_84_P148728		-1.02667		ATAMI1 (AMIDASE-LIKE PROTEIN 1); amidase [AT1G08980.1]	TC285126	AT1G08980.1
A_84_P752675	-1.43395			similar to unknown protein [Arabidopsis thaliana] (TAIR:AT5G39650.1); similar to 52O08_3 [Brassica rapa subsp. pekinensis] (GB:AAZ67548.1); contains InterPro domain Protein of unknown function DUF679 (InterPro:IPR007770) [AT1G09157.1]	NP041521	AT1G09157.1
A_84_P18973		-1.55891		CRB; binding / catalytic/ coenzyme binding [AT1G09340.1]	TC286536	AT1G09340.1
A_84_P809919		-1.62114		CRB; binding / catalytic/ coenzyme binding [AT1G09340.1]	TC286536	AT1G09340.1
A_84_P851072		-1.51157		CRB; binding / catalytic/ coenzyme binding [AT1G09340.1]	TC305915	AT1G09340.1
A_84_P16114		-2.12101		ATGOLS3 (ARABIDOPSIS THALIANA GALACTINOL SYNTHASE 3); transferase, transferring glycosyl groups / transferase, transferring hexosyl groups [AT1G09350.1]	TC286932	AT1G09350.1
A_84_P12334	-3.09662	-2.90817		invertase/pectin methylesterase inhibitor family protein [AT1G09360.1]	NP040864	AT1G09360.1
A_84_P17060		-1.54938		protein kinase family protein [AT1G09440.1]	NP040872	AT1G09440.1
A_84_P816073		1.36596	1.41154	GLP5 (GERMIN-LIKE PROTEIN 5); manganese ion binding / metal ion binding / nutrient reservoir [AT1G09560.1]	TC313290	AT1G09560.1
A_84_P14224		1.34775	1.36568	GLP5 (GERMIN-LIKE PROTEIN 5); manganese ion binding / metal ion binding / nutrient reservoir [AT1G09560.1]	TC313290	AT1G09560.1
A_84_P15162	-1.17616	-1.48812		ATOPT2 (oligopeptide transporter 2); oligopeptide transporter [AT1G09930.1]		AT1G09930.1
A_84_P273450		2.39794		phosphoglycerate/bisphosphoglycerate mutase family protein [AT1G09935.1]		AT1G09935.1
A_84_P14226		1.57097		ATBCAT-2; branched-chain-amino-acid transaminase/ catalytic [AT1G10070.1]	TC308032	AT1G10070.1
A_84_P16120	1.02278	1.44036		similar to unknown protein [Arabidopsis thaliana] (TAIR:AT1G58420.1); contains InterPro domain Uncharacterised conserved protein UCP031279 (InterPro:IPR016972) [AT1G10140.1]	TC294488	AT1G10140.1
A_84_P577248			1.55125	similar to ATPP2-A9 (Phloem protein 2-A9), carbohydrate binding [Arabidopsis thaliana] (TAIR:AT1G31200.1); similar to unknown [Populus trichocarpa x Populus deltoides] (GB:ABK96474.1) [AT1G10155.1]		AT1G10155.1
A_84_P611100		2.12203	1.93644	similar to ZCF37 [Arabidopsis thaliana] (TAIR:AT1G59590.1) [AT1G10220.1]	NP035154	AT1G10220.1
A_84_P112622	-1.07823	-1.2307		ATGSTU18 (GLUTATHIONE S-TRANSFERASE 29); glutathione transferase [AT1G10360.1]	NP035168	AT1G10360.1
A_84_P533782	-1.02372			similar to unknown protein [Arabidopsis thaliana] (TAIR:AT1G10717.1); similar to unnamed protein product [Vitis vinifera] (GB:CAO16118.1); contains domain PH domain-like (SSF50729) [AT1G10710.1]	NP302908	AT1G10710.1
A_84_P291354		1.61179		unknown protein [AT1G10990.1]	TC297175	AT1G10990.1
A_84_P10508		1.30683		SNF2 domain-containing protein / helicase domain-containing protein / zinc finger protein-related [AT1G11100.1]		AT1G11100.1
A_84_P10640	-1.11455			similar to unknown protein [Arabidopsis thaliana] (TAIR:AT1G11230.1); similar to fiber expressed protein [Gossypium hirsutum] (GB:AAY85179.1); contains InterPro domain Protein of unknown function DUF761, plant (InterPro:IPR008480) [AT1G11220.1]	TC312295	AT1G11220.1
A_84_P10638		1.30798		STP1 (SUGAR TRANSPORTER 1); carbohydrate transmembrane transporter/ sugar:hydrogen ion symporter [AT1G11260.1]	TC307290	AT1G11260.1
A_84_P751564		1.88699		pseudogene, putative glucose 6 phosphate/phosphate translocator, blastp match of 60% identity and 2.3e-78 P-value to GP [AT1G11595.1]	TC293556	AT1G11595.1
A_84_P198594			-2.97361	unknown protein [AT1G11850.1]	TC302028	AT1G11850.1
A_84_P805764			-2.82142	unknown protein [AT1G11850.4]	TC300369	AT1G11850.4
A_84_P839042	1.71231	1.82795		Encodes a Stigma-specific Stig1 family protein [AT1G11925.1]	NP041824	AT1G11925.1
A_84_P299810	1.60411	1.76353		Encodes a Stigma-specific Stig1 family protein [AT1G11925.1]		AT1G11925.1
A_84_P22827		1.00174		RFL1 (RPS5-LIKE 1); ATP binding / protein binding [AT1G12210.1]	TC280962	AT1G12210.1
A_84_P823277		-1.11058		thylakoid lumenal protein-related [AT1G12250.1]	NP235696	AT1G12250.1
A_84_P14712		-1.09476		thylakoid lumenal protein-related [AT1G12250.1]	TC291688	AT1G12250.1
A_84_P821788		-1.0324		similar to unknown protein [Arabidopsis thaliana] (TAIR:AT4G22850.1); similar to unnamed protein product [Vitis vinifera] (GB:CAO63604.1); contains InterPro domain SNARE associated Golgi protein (InterPro:IPR015414) [AT1G12450.1]	TC291181	AT1G12450.1
A_84_P821783		-1.09615		similar to unknown protein [Arabidopsis thaliana] (TAIR:AT4G22850.1); similar to unnamed protein product [Vitis vinifera] (GB:CAO63604.1); contains InterPro domain SNARE associated Golgi protein (InterPro:IPR015414) [AT1G12450.1]	TC291181	AT1G12450.1
A_84_P16247	-1.32712	-1.11556		DDF1 (DWARF AND DELAYED FLOWERING 1); DNA binding / transcription factor [AT1G12610.1]	TC295962	AT1G12610.1
A_84_P15540		-1.25638		GAPA-2; glyceraldehyde-3-phosphate dehydrogenase [AT1G12900.1]	TC301128	AT1G12900.1
A_84_P12368		1.46459		CYP71B29 (cytochrome P450, family 71, subfamily B, polypeptide 29); oxygen binding [AT1G13100.1]	NP035666	AT1G13100.1
A_84_P13313		1.8978		CYP71B7 (cytochrome P450, family 71, subfamily B, polypeptide 7); oxygen binding [AT1G13110.1]	TC283834	AT1G13110.1
A_84_P548849		2.46481		similar to unknown protein [Arabidopsis thaliana] (TAIR:AT1G13520.1); similar to unnamed protein product [Vitis vinifera] (GB:CAO42040.1); contains InterPro domain Protein of unknown function DUF1262 (InterPro:IPR010683) [AT1G13480.1]	TC313239	AT1G13480.1
A_84_P213008		2.3038		similar to unknown protein [Arabidopsis thaliana] (TAIR:AT1G13480.1); similar to unnamed protein product [Vitis vinifera] (GB:CAO42040.1); contains InterPro domain Protein of unknown function DUF1262 (InterPro:IPR010683) [AT1G13520.1]	TC305192	AT1G13520.1
A_84_P588837		1.97108		similar to unknown protein [Arabidopsis thaliana] (TAIR:AT1G13500.1); similar to unnamed protein product [Vitis vinifera] (GB:CAO42040.1); contains InterPro domain Protein of unknown function DUF1262 (InterPro:IPR010683) [AT1G13530.1]	TC305192	AT1G13530.1
A_84_P582608		2.56111		similar to unknown protein [Arabidopsis thaliana] (TAIR:AT1G13510.1); similar to unnamed protein product [Vitis vinifera] (GB:CAO42040.1); contains InterPro domain Protein of unknown function DUF1262 (InterPro:IPR010683) [AT1G13540.1]	TC288579	AT1G13540.1
A_84_P569232		2.63743		similar to unknown protein [Arabidopsis thaliana] (TAIR:AT1G13480.1); similar to unnamed protein product [Vitis vinifera] (GB:CAO42040.1); contains InterPro domain Protein of unknown function DUF1262 (InterPro:IPR010683) [AT1G13550.1]	TC288579	AT1G13550.1
A_84_P22860	2.90167	3.47106	4.51725	ATPSK1 (PHYTOSULFOKINE 1 PRECURSOR); growth factor [AT1G13590.1]	TC311016	AT1G13590.1
A_84_P12447		-1.26005		hydrolase, alpha/beta fold family protein [AT1G13820.1]	NP221425	AT1G13820.1
A_84_P299330		-1.07552		similar to nodulin-related [Arabidopsis thaliana] (TAIR:AT2G03440.1); similar to hypothetical protein [Vitis vinifera] (GB:CAN63832.1) [AT1G13930.1]	TC301012	AT1G13930.1
A_84_P809376		-1.0865		similar to nodulin-related [Arabidopsis thaliana] (TAIR:AT2G03440.1); similar to hypothetical protein [Vitis vinifera] (GB:CAN63832.1) [AT1G13930.1]	TC301012	AT1G13930.1
A_84_P809361		-1.26027		similar to nodulin-related [Arabidopsis thaliana] (TAIR:AT2G03440.1); similar to hypothetical protein [Vitis vinifera] (GB:CAN63832.1) [AT1G13930.1]	TC302195	AT1G13930.1
A_84_P809354		-1.31152		similar to nodulin-related [Arabidopsis thaliana] (TAIR:AT2G03440.1); similar to hypothetical protein [Vitis vinifera] (GB:CAN63832.1) [AT1G13930.1]	TC313851	AT1G13930.1
A_84_P15207		2.14324		2-oxoglutarate-dependent dioxygenase, putative [AT1G14120.1]	TC288130	AT1G14120.1
A_84_P18991		-1.85077		oxygen evolving enhancer 3 (PsbQ) family protein [AT1G14150.1]	TC295949	AT1G14150.1
A_84_P544427		-1.86068		oxygen evolving enhancer 3 (PsbQ) family protein [AT1G14150.2]	TC295949	AT1G14150.2
A_84_P310443		1.25936		zinc finger (C3HC4-type RING finger) family protein [AT1G14260.1]	TC286810	AT1G14260.1
A_84_P20048		-1.15731		oxidoreductase [AT1G14345.1]	NP186776	AT1G14345.1
A_84_P808242		-1.1712		oxidoreductase [AT1G14345.1]	NP186776	AT1G14345.1
A_84_P821467		-1.07386		MIOX1 (MYO-INISITOL OXYGENASE); oxidoreductase [AT1G14520.1]	NP213656	AT1G14520.1
A_84_P11500		1.38541		SWAP (Suppressor-of-White-APricot)/surp domain-containing protein [AT1G14640.1]	TC301395	AT1G14640.1
A_84_P11475		-1.6981		ATPAP3/PAP3 (purple acid phosphatase 3); acid phosphatase/ protein serine/threonine phosphatase [AT1G14700.1]	TC301777	AT1G14700.1
A_84_P786909		-1.99786		ATPAP3/PAP3 (purple acid phosphatase 3); acid phosphatase/ protein serine/threonine phosphatase [AT1G14700.1]	TC301777	AT1G14700.1
A_84_P788741			2.69371	SDS (SOLO DANCERS) [AT1G14750.2]	NP221970	AT1G14750.2
A_84_P14273	-1.16061	-1.27203		similar to unknown protein [Arabidopsis thaliana] (TAIR:AT4G24290.2); similar to unnamed protein product [Vitis vinifera] (GB:CAO42380.1); contains InterPro domain Membrane attack complex component/perforin/complement C9 (InterPro:IPR001862) [AT1G14780.1]	TC282399	AT1G14780.1
A_84_P12389	1.42655	2.06808		ATNUDT18 (Arabidopsis thaliana Nudix hydrolase homolog 18); hydrolase [AT1G14860.1]	TC295779	AT1G14860.1
A_84_P82539	1.41139	1.74803		Identical to Uncharacterized protein At1g14870 [Arabidopsis Thaliana] (GB:Q9LQU4); similar to unknown protein [Arabidopsis thaliana] (TAIR:AT5G35525.1); similar to unnamed protein product [Vitis vinifera] (GB:CAO42338.1); contains InterPro domain Aspartic acid and asparagine hydroxylation site (InterPro:IPR000152); contains InterPro domain Protein of unknown function Cys-rich (InterPro:IPR006461)…	TC295245	AT1G14870.1
A_84_P754620	-1.57139			Identical to Putative F-box protein At1g15015 [Arabidopsis Thaliana] (GB:Q9M9Q4); similar to F-box protein-related / SLF-related [Arabidopsis thaliana] (TAIR:AT5G10340.1); contains InterPro domain Cyclin-like F-box (InterPro:IPR001810) [AT1G15015.1]	NP302916	AT1G15015.1
A_84_P542646		7.93548		glutamine amidotransferase-related [AT1G15040.1]	TC288936	AT1G15040.1
A_84_P818172	3.75544	7.11782		glutamine amidotransferase-related [AT1G15040.1]	TC290124	AT1G15040.1
A_84_P550623		1.34318		Identical to Fasciclin-like arabinogalactan protein 19 precursor (FLA19) [Arabidopsis Thaliana] (GB:Q5Q0H2;GB:Q9XI50); contains InterPro domain Beta-Ig-H3/fasciclin (InterPro:IPR000782) [AT1G15190.1]	NP1339816	AT1G15190.1
A_84_P10483	-1.18294			similar to unknown protein [Arabidopsis thaliana] (TAIR:AT3G16070.1) [AT1G15260.1]	TC293276	AT1G15260.1
A_84_P21831		3.40794		lactoylglutathione lyase family protein / glyoxalase I family protein [AT1G15380.1]	TC295017	AT1G15380.1
A_84_P571918		2.90785		unknown protein [AT1G15385.1]	TC299434	AT1G15385.1
A_84_P13220		1.21072		similar to unnamed protein product [Vitis vinifera] (GB:CAO46050.1); contains InterPro domain Protein of unknown function NUC189, C-terminal (InterPro:IPR012979) [AT1G15420.1]	NP034546	AT1G15420.1
A_84_P11446		2.03936		ATPDR12/PDR12 (PLEIOTROPIC DRUG RESISTANCE 12); ATPase, coupled to transmembrane movement of substances [AT1G15520.1]	TC307764	AT1G15520.1
A_84_P14281	-2.0641			GA4 (GA REQUIRING 4); gibberellin 3-beta-dioxygenase [AT1G15550.1]	TC289350	AT1G15550.1
A_84_P854414	1.1402			kelch repeat-containing F-box family protein [AT1G15670.1]	TC309118	AT1G15670.1
A_84_P199774		-1.95224		similar to unnamed protein product [Vitis vinifera] (GB:CAO49411.1); contains domain G3DSA:3.40.50.2000 (G3DSA:3.40.50.2000); contains domain SSF53756 (SSF53756) [AT1G15980.1]	TC284907	AT1G15980.1
A_84_P17116			2.52233	WAKL4 (WALL ASSOCIATED KINASE-LIKE 4); kinase [AT1G16150.1]	NP169127	AT1G16150.1
A_84_P254700		1.43211		similar to unknown protein [Arabidopsis thaliana] (TAIR:AT1G79160.1); similar to unnamed protein product [Vitis vinifera] (GB:CAO47911.1) [AT1G16500.1]	TC290288	AT1G16500.1
A_84_P842278		-1.23108		HCF173 (HIGH CHLOROPHYLL FLUORESCENCE PHENOTYPE 173); binding / catalytic/ oxidoreductase/ transcription repressor [AT1G16720.1]	NP236035	AT1G16720.1
A_84_P131606		-1.23989		HCF173 (HIGH CHLOROPHYLL FLUORESCENCE PHENOTYPE 173); binding / catalytic/ oxidoreductase/ transcription repressor [AT1G16720.1]	TC307225	AT1G16720.1
A_84_P566577		-1.04574		similar to unknown [Picea sitchensis] (GB:ABK21208.1) [AT1G16730.1]		AT1G16730.1
A_84_P567467		1.07155		pentatricopeptide (PPR) repeat-containing protein [AT1G16830.1]		AT1G16830.1
A_84_P581722		-1.24072		similar to unknown protein [Arabidopsis thaliana] (TAIR:AT1G53400.1); similar to unknown [Brassica rapa] (GB:ABL97984.1); contains domain PTHR13609 (PTHR13609) [AT1G16960.1]	TC308857	AT1G16960.1
A_84_P831211		1.0602		CYP72C1 (cytochrome P450, family 72, subfamily C, polypeptide 1); oxygen binding [AT1G17060.1]	TC311548	AT1G17060.1
A_84_P793001	1.02576			LOX3 (Lipoxygenase 3); iron ion binding / lipoxygenase/ metal ion binding / oxidoreductase, acting on single donors with incorporation of molecular oxygen, incorporation of two atoms of oxygen [AT1G17420.1]	TC280847	AT1G17420.1
A_84_P11332		1.68736		disease resistance protein (TIR-NBS class), putative [AT1G17615.1]	TC288613	AT1G17615.1
A_84_P21746	1.83211		1.98384	phosphoric monoester hydrolase [AT1G17710.1]	TC310474	AT1G17710.1
A_84_P14344		1.50111	1.66888	trypsin and protease inhibitor family protein / Kunitz family protein [AT1G17860.1]	TC302106	AT1G17860.1
A_84_P799411		1.4003	1.48724	trypsin and protease inhibitor family protein / Kunitz family protein [AT1G17860.1]	TC302106	AT1G17860.1
A_84_P811026		1.37026	1.48885	trypsin and protease inhibitor family protein / Kunitz family protein [AT1G17860.1]	TC302106	AT1G17860.1
A_84_P15294	-1.63442			HDG12 (HOMEODOMAIN GLABROUS12); transcription factor [AT1G17920.1]	NP228545	AT1G17920.1
A_84_P828652		-1.00908		similar to unknown protein [Arabidopsis thaliana] (TAIR:AT1G73390.2); similar to unknown protein [Arabidopsis thaliana] (TAIR:AT1G73390.1); similar to unknown protein [Arabidopsis thaliana] (TAIR:AT1G73390.3); similar to unnamed protein product [Vitis vinifera] (GB:CAO62047.1); contains InterPro domain BRO1 (InterPro:IPR004328) [AT1G17940.1]	TC302446	AT1G17940.1
A_84_P20965		-1.59441		zinc finger (C3HC4-type RING finger) family protein [AT1G17970.1]	NP228550	AT1G17970.1
A_84_P108002		-1.77558		similar to unnamed protein product [Vitis vinifera] (GB:CAO68142.1) [AT1G18060.1]	TC294587	AT1G18060.1
A_84_P822956		-1.7657		similar to unnamed protein product [Vitis vinifera] (GB:CAO68142.1) [AT1G18060.1]	TC305907	AT1G18060.1
A_84_P12073	2.34322	1.32816	2.46309	similar to unknown [Populus trichocarpa] (GB:ABK94840.1) [AT1G18290.1]	TC298778	AT1G18290.1
A_84_P16799			1.17615	ATNUDT4 (Arabidopsis thaliana Nudix hydrolase homolog 4); hydrolase [AT1G18300.1]	TC296132	AT1G18300.1
A_84_P13013		1.0905		Identical to Uncharacterized protein At1g18380 precursor [Arabidopsis Thaliana] (GB:Q5BQ05;GB:Q5Q0G6;GB:Q8RX30;GB:Q9LPQ6); similar to unknown protein [Arabidopsis thaliana] (TAIR:AT1G67025.1); similar to unnamed protein product [Vitis vinifera] (GB:CAO68096.1) [AT1G18380.1]	NP184595	AT1G18380.1
A_84_P13407		1.18945		sulfotransferase family protein [AT1G18590.1]	TC289387	AT1G18590.1
A_84_P16236	-1.26338			glycosyl hydrolase family protein 17 [AT1G18650.1]	TC301103	AT1G18650.1
A_84_P256080		-1.31662		similar to unknown [Populus trichocarpa] (GB:ABK95263.1) [AT1G18730.1]	TC296786	AT1G18730.1
A_84_P753050	1.45979	1.59735	1.64582	MIF3 (MINI ZINC FINGER) [AT1G18835.1]	NP1419837	AT1G18835.1
A_84_P795916	1.44719	1.60966		MIF3 (MINI ZINC FINGER) [AT1G18835.1]	NP1419837	AT1G18835.1
A_84_P11448		-2.16157		ICS2; isochorismate synthase [AT1G18870.1]	TC302202	AT1G18870.1
A_84_P788710		1.54739		transposable element gene [AT1G19030.1]	NP221461	AT1G19030.1
A_84_P10395		-1.67548	-1.38751	ARR7 (RESPONSE REGULATOR 7); transcription regulator/ two-component response regulator [AT1G19050.1]	TC296212	AT1G19050.1
A_84_P16240		-2.03388		LHCA6 (Photosystem I light harvesting complex gene 6); chlorophyll binding [AT1G19150.1]	TC290070	AT1G19150.1
A_84_P13909		-2.33434	-1.32907	pathogenesis-related thaumatin family protein [AT1G19320.1]	TC293504	AT1G19320.1
A_84_P10129		-1.27887		similar to unknown protein [Arabidopsis thaliana] (TAIR:AT1G75060.1); similar to unnamed protein product [Vitis vinifera] (GB:CAO61216.1) [AT1G19330.1]	TC288652	AT1G19330.1
A_84_P16748		-1.1045		BES1 (BRI1-EMS-SUPPRESSOR 1); transcription regulator [AT1G19350.1]	TC286296	AT1G19350.1
A_84_P13913		1.14168		similar to unknown protein [Arabidopsis thaliana] (TAIR:AT5G65650.1); similar to unknown [Vitis pseudoreticulata] (GB:ABC69762.1); similar to unnamed protein product [Vitis vinifera] (GB:CAO61173.1); contains InterPro domain Protein of unknown function DUF1195 (InterPro:IPR010608) [AT1G19380.1]	TC297969	AT1G19380.1
A_84_P19591		-1.08412		integral membrane protein, putative / sugar transporter family protein [AT1G19450.1]	NP221621	AT1G19450.1
A_84_P199304	1.53974			LCR78/PDF1.4 (Low-molecular-weight cysteine-rich 78) [AT1G19610.1]	TC302668	AT1G19610.1
A_84_P829392		1.20462		similar to unknown protein [Arabidopsis thaliana] (TAIR:AT5G11600.1); similar to unknown [Populus trichocarpa] (GB:ABK92449.1) [AT1G19990.1]	TC300167	AT1G19990.1
A_84_P20031		-1.26493		ATLFNR2 (LEAF FNR 2); NADPH dehydrogenase/ oxidoreductase/ poly(U) binding [AT1G20020.1]	NP221805	AT1G20020.1
A_84_P23814		-1.13305		pathogenesis-related thaumatin family protein [AT1G20030.1]	TC307026	AT1G20030.1
A_84_P22866		-1.55748		unknown protein [AT1G20070.1]	TC296341	AT1G20070.1
A_84_P752246		4.26806		lipase [AT1G20130.1]	TC301084	AT1G20130.1
A_84_P18132	-1.50036			Identical to UPF0496 protein At1g20180 [Arabidopsis Thaliana] (GB:Q6DYE5;GB:Q5BQ01;GB:Q9LNU2); similar to unknown protein [Arabidopsis thaliana] (TAIR:AT3G49070.1); similar to unnamed protein product [Vitis vinifera] (GB:CAO60936.1); contains InterPro domain Protein of unknown function DUF677 (InterPro:IPR007749) [AT1G20180.1]	NP1422711	AT1G20180.1
A_84_P21915		-2.77772		ATEXPA11 (ARABIDOPSIS THALIANA EXPANSIN A11) [AT1G20190.1]	TC290385	AT1G20190.1
A_84_P16242		1.38631		pentatricopeptide (PPR) repeat-containing protein [AT1G20300.1]	TC284037	AT1G20300.1
A_84_P181974		1.01043		similar to unknown protein [Arabidopsis thaliana] (TAIR:AT1G76070.1); similar to hypothetical protein [Vitis vinifera] (GB:CAN83887.1) [AT1G20310.1]	TC291114	AT1G20310.1
A_84_P17009		-1.91573		zinc finger (C3HC4-type RING finger) family protein [AT1G20823.1]	TC292861	AT1G20823.1
A_84_P502754		-1.08253		auxin efflux carrier family protein [AT1G20925.1]		AT1G20925.1
A_84_P524941		2.37065		nucleic acid binding / nucleotide binding [AT1G21320.1]		AT1G21320.1
A_84_P209848		-1.30606		nodulin MtN3 family protein [AT1G21460.1]	TC290246	AT1G21460.1
A_84_P16577		-1.13972		unknown protein [AT1G21520.1]		AT1G21520.1
A_84_P21308	1.14975			calcium-binding protein, putative [AT1G21550.1]	TC297495	AT1G21550.1
A_84_P19519		-1.64756		similar to unnamed protein product [Vitis vinifera] (GB:CAO61872.1); contains InterPro domain TRAM, LAG1 and CLN8 homology; (InterPro:IPR006634) [AT1G21790.1]	TC287625	AT1G21790.1
A_84_P20470		-2.37878		AP2 domain-containing transcription factor family protein [AT1G21910.1]	TC288345	AT1G21910.1
A_84_P841077		-1.47869		senescence-associated protein-related [AT1G22160.1]	NP226293	AT1G22160.1
A_84_P53240		-1.4787		senescence-associated protein-related [AT1G22160.1]	TC303089	AT1G22160.1
A_84_P19082		-1.168		AP2 domain-containing transcription factor, putative [AT1G22190.1]	TC292590	AT1G22190.1
A_84_P751348		-1.19262		ATUGT85A5 (UDP-GLUCOSYL TRANSFERASE 85A5); transferase, transferring glycosyl groups [AT1G22370.1]	TC290968	AT1G22370.1
A_84_P831849	1.19595	1.30574		2-dehydro-3-deoxyphosphoheptonate aldolase, putative / 3-deoxy-D-arabino-heptulosonate 7-phosphate synthase, putative / DAHP synthetase, putative [AT1G22410.1]	TC293115	AT1G22410.1
A_84_P158205		-1.26565		similar to unknown protein [Arabidopsis thaliana] (TAIR:AT1G72240.1) [AT1G22470.1]	NP169147	AT1G22470.1
A_84_P750837		-1.66735		AGL87; transcription factor [AT1G22590.1]	TC294351	AT1G22590.1
A_84_P846989		-1.08404		heat shock protein binding / unfolded protein binding [AT1G22630.1]	TC298363	AT1G22630.1
A_84_P13295		1.48687	1.27641	beta-fructofuranosidase, putative / invertase, putative / saccharase, putative / beta-fructosidase, putative [AT1G22650.1]	NP302877	AT1G22650.1
A_84_P22724	2.03509	2.00556	1.76776	similar to disease resistance-responsive family protein [Arabidopsis thaliana] (TAIR:AT5G42500.1); similar to unnamed protein product [Vitis vinifera] (GB:CAO23438.1); similar to hypothetical protein [Vitis vinifera] (GB:CAN61168.1); contains InterPro domain Plant disease resistance response protein (InterPro:IPR004265) [AT1G22900.1]	TC297859	AT1G22900.1
A_84_P15157		1.00747		oxidoreductase, acting on paired donors, with incorporation or reduction of molecular oxygen, 2-oxoglutarate as one donor, and incorporation of one atom each of oxygen into both donors [AT1G22950.1]	TC304630	AT1G22950.1
A_84_P14212	-1.9743			heavy-metal-associated domain-containing protein / copper chaperone (CCH)-related [AT1G22990.1]	TC296965	AT1G22990.1
A_84_P824548		1.04878		ubiquitin extension protein, putative / 40S ribosomal protein S27A (RPS27aA) [AT1G23410.1]	TC296688	AT1G23410.1
A_84_P17024		-1.02322		polygalacturonase [AT1G23460.1]	NP039357	AT1G23460.1
A_84_P790517		-1.14997		polygalacturonase [AT1G23460.1]	NP039357	AT1G23460.1
A_84_P23647		2.4765		similar to unknown protein [Arabidopsis thaliana] (TAIR:AT1G23520.1); similar to hypothetical protein [Oryza sativa (japonica cultivar-group)] (GB:BAD23602.1); contains InterPro domain Protein of unknown function DUF220 (InterPro:IPR003863) [AT1G23510.1]	NP221351	AT1G23510.1
A_84_P788686		2.44234		similar to unknown protein [Arabidopsis thaliana] (TAIR:AT1G23520.1); similar to hypothetical protein [Oryza sativa (japonica cultivar-group)] (GB:BAD23602.1); contains InterPro domain Protein of unknown function DUF220 (InterPro:IPR003863) [AT1G23510.2]	NP221351	AT1G23510.2
A_84_P22699	-1.4265			protein kinase family protein [AT1G23540.1]	NP221349	AT1G23540.1
A_84_P10406	1.18986	1.41244		similar to unknown protein [Arabidopsis thaliana] (TAIR:AT1G70480.2); similar to unknown protein [Arabidopsis thaliana] (TAIR:AT1G70480.1); similar to unnamed protein product [Vitis vinifera] (GB:CAO66084.1); contains InterPro domain Protein of unknown function DUF220 (InterPro:IPR003863) [AT1G23560.1]	NP1340019	AT1G23560.1
A_84_P818893		-1.41311		oxidoreductase, zinc-binding dehydrogenase family protein [AT1G23740.1]	TC286914	AT1G23740.1
A_84_P10407		-1.44962		oxidoreductase, zinc-binding dehydrogenase family protein [AT1G23740.1]	TC286914	AT1G23740.1
A_84_P848231		-1.29822		oxidoreductase, zinc-binding dehydrogenase family protein [AT1G23740.1]	TC300993	AT1G23740.1
A_84_P14672		1.39988		similar to unknown protein [Arabidopsis thaliana] (TAIR:AT1G23840.1); similar to hypothetical protein [Vitis vinifera] (GB:CAN74577.1) [AT1G23850.1]	TC286885	AT1G23850.1
A_84_P795998	-2.30114			MLP423 (MLP-LIKE PROTEIN 423) [AT1G24020.1]	NP227868	AT1G24020.1
A_84_P810593	-2.79635		-2.68467	MLP423 (MLP-LIKE PROTEIN 423) [AT1G24020.1]	NP227868	AT1G24020.1
A_84_P19409	-3.20805		-2.81757	MLP423 (MLP-LIKE PROTEIN 423) [AT1G24020.1]	NP227868	AT1G24020.1
A_84_P17520		-1.00174		ATCSLA10 (Cellulose synthase-like A10); transferase, transferring glycosyl groups [AT1G24070.1]	NP227865	AT1G24070.1
A_84_P524952		-1.33814		epsin N-terminal homology (ENTH) domain-containing protein / clathrin assembly protein-related [AT1G25240.1]	TC297628	AT1G25240.1
A_84_P10572			1.26399	protein kinase family protein [AT1G25390.1]	TC308844	AT1G25390.1
A_84_P149828	-1.01682			aspartyl protease family protein [AT1G25510.1]	TC284020	AT1G25510.1
A_84_P799245		-1.05322		GCN5-related N-acetyltransferase (GNAT) family protein [AT1G26220.1]	TC294007	AT1G26220.1
A_84_P73254		-1.15693		GCN5-related N-acetyltransferase (GNAT) family protein [AT1G26220.1]	TC294007	AT1G26220.1
A_84_P19294		1.67972		FAD-binding domain-containing protein [AT1G26380.1]	TC283866	AT1G26380.1
A_84_P12674		2.88018	3.73206	FAD-binding domain-containing protein [AT1G26400.1]	NP232560	AT1G26400.1
A_84_P16454		2.07353		FAD-binding domain-containing protein [AT1G26410.1]	TC283778	AT1G26410.1
A_84_P20237		1.47054		FAD-binding domain-containing protein [AT1G26420.1]	TC312515	AT1G26420.1
A_84_P243235		-1.28819		CLE9 (CLAVATA3/ESR-RELATED 9); receptor binding [AT1G26600.1]	TC292786	AT1G26600.1
A_84_P15526			1.63689	similar to unknown protein [Arabidopsis thaliana] (TAIR:AT1G26720.1) [AT1G26710.1]	TC292435	AT1G26710.1
A_84_P12696		-2.49759	-1.89578	Dof-type zinc finger domain-containing protein [AT1G26790.1]	TC292727	AT1G26790.1
A_84_P833445		-2.12284		Dof-type zinc finger domain-containing protein [AT1G26790.1]	TC292784	AT1G26790.1
A_84_P20802		-1.67405		similar to unknown protein [Arabidopsis thaliana] (TAIR:AT5G40720.1); similar to unknown [Populus trichocarpa] (GB:ABK95005.1); contains InterPro domain Protein of unknown function DUF23 (InterPro:IPR008166) [AT1G27200.1]	TC283233	AT1G27200.1
A_84_P846038		-1.77585		similar to unknown protein [Arabidopsis thaliana] (TAIR:AT5G40720.1); similar to unknown [Populus trichocarpa] (GB:ABK95005.1); contains InterPro domain Protein of unknown function DUF23 (InterPro:IPR008166) [AT1G27200.1]	TC294967	AT1G27200.1
A_84_P115172		-1.29772		RIC2 (ROP-INTERACTIVE CRIB MOTIF-CONTAINING PROTEIN 2) [AT1G27380.1]	NP424366	AT1G27380.1
A_84_P20849	-1.92637	-1.65708		lecithin:cholesterol acyltransferase family protein / LACT family protein [AT1G27480.1]	TC285026	AT1G27480.1
A_84_P12249			1.1202	PGP14 (P-GLYCOPROTEIN 14); ATPase, coupled to transmembrane movement of substances [AT1G28010.1]	TC309493	AT1G28010.1
A_84_P16032		1.61001		protein binding / zinc ion binding [AT1G28040.1]	NP305893	AT1G28040.1
A_84_P801378		-1.29335		PUP1 (PURINE PERMEASE 1); purine transmembrane transporter [AT1G28230.1]	TC287847	AT1G28230.1
A_84_P10363		-1.34678		PUP1 (PURINE PERMEASE 1); purine transmembrane transporter [AT1G28230.1]	TC287847	AT1G28230.1
A_84_P23823		1.80391		ATERF12/ERF12 (ERF domain protein 12); DNA binding / transcription factor/ transcription repressor [AT1G28360.1]	TC293150	AT1G28360.1
A_84_P579082		1.74981		unknown protein [AT1G28375.1]	TC296775	AT1G28375.1
A_84_P852475	1.50617	1.71897		protein kinase family protein [AT1G28390.1]	TC307564	AT1G28390.1
A_84_P812834		1.22731		GRX480; thiol-disulfide exchange intermediate [AT1G28480.1]	TC298595	AT1G28480.1
A_84_P200014			1.48464	lipase, putative [AT1G28660.1]	TC294875	AT1G28660.1
A_84_P21876		1.13873		transferase family protein [AT1G28680.1]	TC283898	AT1G28680.1
A_84_P785123		1.26122		transferase family protein [AT1G28680.1]	TC294001	AT1G28680.1
A_84_P752242	1.00875			pseudogene, hypothetical protein [AT1G29190.1]		AT1G29190.1
A_84_P23274		1.03248		similar to hypothetical protein [Vitis vinifera] (GB:CAN69942.1) [AT1G29290.1]	TC299243	AT1G29290.1
A_84_P219948		-1.17385		COR314-TM2 (cold regulated 314 thylakoid membrane 2) [AT1G29390.1]	NP305631	AT1G29390.1
A_84_P753711		1.15404		unknown protein [AT1G29418.1]	TC305060	AT1G29418.1
A_84_P537376		-2.70272		similar to SAUR68 (SMALL AUXIN UPREGULATED 68) [Arabidopsis thaliana] (TAIR:AT1G29510.1); similar to auxin-responsive protein [Brassica rapa] (GB:ABV89665.1); contains InterPro domain Auxin responsive SAUR protein (InterPro:IPR003676) [AT1G29420.1]		AT1G29420.1
A_84_P10257		-1.94655		auxin-responsive family protein [AT1G29430.1]	TC296228	AT1G29430.1
A_84_P182224		-1.5146		similar to unnamed protein product [Vitis vinifera] (GB:CAO42101.1); contains domain SSF56281 (SSF56281) [AT1G29700.1]	TC288295	AT1G29700.1
A_84_P750540		1.70222		pseudogene, putative receptor-related serine/threonine kinase, blastp match of 67% identity and 2.6e-98 P-value to GP [AT1G29715.1]	NP954433	AT1G29715.1
A_84_P210788		-1.74794		CAB2 (Chlorophyll a/b-binding protein 2); chlorophyll binding [AT1G29920.1]	TC305409	AT1G29920.1
A_84_P22822		1.29146	1.29436	diadenosine 5',5'''-P1,P4-tetraphosphate hydrolase, putative [AT1G30110.1]	TC291987	AT1G30110.1
A_84_P595141		1.8384		JAZ8/TIFY5A (JASMONATE-ZIM-DOMAIN PROTEIN 8) [AT1G30135.1]	TC297853	AT1G30135.1
A_84_P555983	-1.18585	-1.69005		similar to unknown protein [Arabidopsis thaliana] (TAIR:AT2G34610.1) [AT1G30190.1]	NP306451	AT1G30190.1
A_84_P10404		1.11966		protein binding / transcription activator/ transcription regulator/ translation initiation factor/ zinc ion binding [AT1G30455.1]	NP173314	AT1G30455.1
A_84_P16138	2.74381	2.81862	3.06922	FAD-binding domain-containing protein [AT1G30700.1]	TC302703	AT1G30700.1
A_84_P18030		2.34076	2.95216	FAD-binding domain-containing protein [AT1G30720.1]	TC284300	AT1G30720.1
A_84_P18976	1.69056	1.46481	2.51895	FAD-binding domain-containing protein [AT1G30730.1]	TC299155	AT1G30730.1
A_84_P20868		2.20361		FAD-binding domain-containing protein [AT1G30740.1]	TC297614	AT1G30740.1
A_84_P837705			2.46678	F-box family protein [AT1G30780.1]	NP035036	AT1G30780.1
A_84_P753286		-1.89862	-1.05024	MIR167D; miRNA [AT1G31173.1]	TC296758	AT1G31173.1
A_84_P821141		-1.03182		inositol monophosphatase family protein [AT1G31190.1]	NP037613	AT1G31190.1
A_84_P18026		-1.03431		inositol monophosphatase family protein [AT1G31190.1]	NP037613	AT1G31190.1
A_84_P867815		-1.09874		inositol monophosphatase family protein [AT1G31190.1]	NP037613	AT1G31190.1
A_84_P15840	-1.0825			PAZ domain-containing protein / piwi domain-containing protein [AT1G31290.1]	TC294455	AT1G31290.1
A_84_P15318		-1.33182		CYP97A3/LUT5 (CYTOCHROME P450-TYPE MONOOXYGENASE 97A3); carotene beta-ring hydroxylase/ oxygen binding [AT1G31800.1]	TC306062	AT1G31800.1
A_84_P591591		1.73222		unknown protein [AT1G31835.1]	TC296037	AT1G31835.1
A_84_P868344		1.7848	1.39301	XLG3 (EXTRA-LARGE GTP-BINDING PROTEIN 3); signal transducer [AT1G31930.1]	TC310613	AT1G31930.1
A_84_P832687		1.69486		XLG3 (EXTRA-LARGE GTP-BINDING PROTEIN 3); signal transducer [AT1G31930.1]	TC311677	AT1G31930.1
A_84_P23826		1.16283		XLG3 (EXTRA-LARGE GTP-BINDING PROTEIN 3); signal transducer [AT1G31930.1]	TC311677	AT1G31930.1
A_84_P754430		1.5085		unknown pseudogene [AT1G32049.1]		AT1G32049.1
A_84_P848652		-1.46216		PRK (PHOSPHORIBULOKINASE); ATP binding / phosphoribulokinase/ protein binding [AT1G32060.1]	TC301719	AT1G32060.1
A_84_P18150		-1.27762		PRK (PHOSPHORIBULOKINASE); ATP binding / phosphoribulokinase/ protein binding [AT1G32060.1]	TC304500	AT1G32060.1
A_84_P136215		-1.55094		membrane protein, putative [AT1G32080.1]	TC283353	AT1G32080.1
A_84_P10596		1.15546		similar to unknown protein [Arabidopsis thaliana] (TAIR:AT4G16050.1); similar to unknown protein [Arabidopsis thaliana] (TAIR:AT1G51538.1); similar to unnamed protein product [Vitis vinifera] (GB:CAO49973.1); similar to hypothetical protein [Vitis vinifera] (GB:CAN68559.1); contains InterPro domain Protein of unknown function DUF716 (InterPro:IPR006904); contains InterPro domain Protein of unknow…	TC303413	AT1G32120.1
A_84_P21943		1.07107		XTR4 (XYLOGLUCAN ENDOTRANSGLYCOSYLASE 4); hydrolase, acting on glycosyl bonds [AT1G32170.1]	TC287816	AT1G32170.1
A_84_P797717			3.00428	ATL1F; protein binding / zinc ion binding [AT1G32361.1]	TC290157	AT1G32361.1
A_84_P11949		-1.43945		glycine cleavage system H protein, mitochondrial, putative [AT1G32470.1]	TC294959	AT1G32470.1
A_84_P715787		1.03079		similar to unknown protein [Arabidopsis thaliana] (TAIR:AT1G32920.1) [AT1G32928.1]	TC299668	AT1G32928.1
A_84_P841696	-2.76868		-2.78456	dehydration-responsive family protein [AT1G33170.1]	NP228600	AT1G33170.1
A_84_P278270	-2.91105		-2.84995	dehydration-responsive family protein [AT1G33170.1]	TC282563	AT1G33170.1
A_84_P819038		-1.20761		AT-GTL1 (Arabidopsis thaliana GT2-like 1); transcription factor [AT1G33240.1]	TC283099	AT1G33240.1
A_84_P19069		1.2723		helicase domain-containing protein [AT1G33390.1]	NP306165	AT1G33390.1
A_84_P751709		-1.46322		protein binding / zinc ion binding [AT1G33480.1]	TC291178	AT1G33480.1
A_84_P10598		2.04849		leucine-rich repeat family protein [AT1G33600.1]	TC290505	AT1G33600.1
A_84_P828366		1.39228		leucine-rich repeat family protein [AT1G33610.1]	TC301853	AT1G33610.1
A_84_P10402		2.25475		leucine-rich repeat family protein [AT1G33670.1]	TC286225	AT1G33670.1
A_84_P18908	-1.87138	-1.64196	-1.85179	AP2 domain-containing transcription factor, putative [AT1G33760.1]	TC294217	AT1G33760.1
A_84_P97876			1.1068	unknown protein [AT1G33860.1]		AT1G33860.1
A_84_P10523		-1.54845		alliinase family protein [AT1G34040.1]	TC286169	AT1G34040.1
A_84_P23603		-3.14938		alliinase family protein [AT1G34060.1]	TC286023	AT1G34060.1
A_84_P20998		-1.91068		PHI-1 (PHOSPHATE-INDUCED 1) [AT1G35140.1]	TC288775	AT1G35140.1
A_84_P23829		-1.25034		dienelactone hydrolase family protein [AT1G35420.1]	TC289093	AT1G35420.1
A_84_P24079		2.29514		APUM9 (ARABIDOPSIS PUMILIO 9); RNA binding [AT1G35730.1]	NP221850	AT1G35730.1
A_84_P14249	1.26559			AP2 domain-containing transcription factor, putative [AT1G36060.1]	TC290413	AT1G36060.1
A_84_P737368		1.04891	1.30221	similar to unknown protein [Arabidopsis thaliana] (TAIR:AT1G36640.1) [AT1G36622.1]		AT1G36622.1
A_84_P750427		1.38456		transposable element gene [AT1G36630.1]	TC297953	AT1G36630.1
A_84_P750060		-1.64229		transposable element gene [AT1G36680.1]		AT1G36680.1
A_84_P852341		-1.87901		SKS6 (SKU5 Similar 6); pectinesterase [AT1G41830.1]	TC307440	AT1G41830.1
A_84_P15458		-1.55081		SKS6 (SKU5 Similar 6); pectinesterase [AT1G41830.1]	TC312493	AT1G41830.1
A_84_P750801		2.83846		pseudogene, glutamate dehydrogenase (fragment), blastp match of 78% identity and 1.6e-94 P-value to GP [AT1G42490.1]		AT1G42490.1
A_84_P811397		-1.15378		GAPB (GLYCERALDEHYDE-3-PHOSPHATE DEHYDROGENASE B SUBUNIT); glyceraldehyde-3-phosphate dehydrogenase [AT1G42970.1]	TC305174	AT1G42970.1
A_84_P21687		-1.15428		GAPB (GLYCERALDEHYDE-3-PHOSPHATE DEHYDROGENASE B SUBUNIT); glyceraldehyde-3-phosphate dehydrogenase [AT1G42970.1]	TC305174	AT1G42970.1
A_84_P811396		-1.20935		GAPB (GLYCERALDEHYDE-3-PHOSPHATE DEHYDROGENASE B SUBUNIT); glyceraldehyde-3-phosphate dehydrogenase [AT1G42970.1]	TC305174	AT1G42970.1
A_84_P11288	-1.07183			zinc-binding family protein [AT1G43000.1]	NP305861	AT1G43000.1
A_84_P752369		1.2134		transposable element gene [AT1G43675.1]	TC311780	AT1G43675.1
A_84_P750433		-1.4617		pseudogene, hypothetical protein [AT1G44150.1]		AT1G44150.1
A_84_P307130		-1.13725		NPQ4 (NONPHOTOCHEMICAL QUENCHING) [AT1G44575.1]	TC310521	AT1G44575.1
A_84_P750979		1.78968		pseudogene, putative H+-ATPase, blastp match of 60% identity and 7.2e-14 P-value to GP [AT1G44940.1]	NP281147	AT1G44940.1
A_84_P751365		-1.26337		similar to triacylglycerol lipase [Arabidopsis thaliana] (TAIR:AT5G42930.1); similar to lipase class 3 family protein [Arabidopsis thaliana] (TAIR:AT5G67050.1); similar to unnamed protein product [Vitis vinifera] (GB:CAO61357.1); contains InterPro domain Lipase, class 3; (InterPro:IPR002921) [AT1G45201.1]	TC285545	AT1G45201.1
A_84_P507242		-1.18137		similar to triacylglycerol lipase [Arabidopsis thaliana] (TAIR:AT5G42930.1); similar to lipase class 3 family protein [Arabidopsis thaliana] (TAIR:AT5G67050.1); similar to unnamed protein product [Vitis vinifera] (GB:CAO61357.1); contains InterPro domain Lipase, class 3; (InterPro:IPR002921) [AT1G45201.1]	TC305825	AT1G45201.1
A_84_P752549		-1.17196		LHCA5 (Photosystem I light harvesting complex gene 5) [AT1G45474.2]	TC291541	AT1G45474.2
A_84_P754167		-1.09578		other RNA [AT1G46554.1]	TC297304	AT1G46554.1
A_84_P786987	-1.1174	-1.05953		RAP2.1 (related to AP2 1); DNA binding / transcription factor [AT1G46768.1]	TC296179	AT1G46768.1
A_84_P842568			1.37971	Toll-Interleukin-Resistance (TIR) domain-containing protein [AT1G47370.1]	NP281095	AT1G47370.1
A_84_P751472			2.13329	pseudogene, putative S-locus-specific glyco protein SLR1 precursor, similar to S-locus-specific glycoprotein SLR1 precursor GB:S20489 GI:99660 from (Arabidopsis thaliana); blastp match of 55% identity and 1.4e-28 P-value to GP [AT1G47460.1]		AT1G47460.1
A_84_P19697		2.13916		disease resistance family protein [AT1G47890.1]	NP305597	AT1G47890.1
A_84_P750226		-1.31248		transposable element gene [AT1G47950.1]		AT1G47950.1
A_84_P16956		-1.24211		C/VIF1 (CELL WALL / VACUOLAR INHIBITOR OF FRUCTOSIDASE 1); pectinesterase inhibitor [AT1G47960.1]	TC293758	AT1G47960.1
A_84_P785871	-1.42322	-1.96023		C/VIF1 (CELL WALL / VACUOLAR INHIBITOR OF FRUCTOSIDASE 1); pectinesterase inhibitor [AT1G47960.1]		AT1G47960.1
A_84_P11283	-1.35542			similar to unknown protein [Arabidopsis thaliana] (TAIR:AT3G62730.1); similar to unnamed protein product [Vitis vinifera] (GB:CAO44946.1) [AT1G47980.1]	TC306533	AT1G47980.1
A_84_P19573		-1.96829		glycoside hydrolase family 28 protein / polygalacturonase (pectinase) family protein [AT1G48100.1]	NP221691	AT1G48100.1
A_84_P264160		-1.16567		similar to hypothetical protein [Vitis vinifera] (GB:CAN81152.1); contains InterPro domain Thioredoxin-like fold (InterPro:IPR012336) [AT1G48300.1]	TC291872	AT1G48300.1
A_84_P797922		-1.08623		similar to unnamed protein product [Vitis vinifera] (GB:CAO45274.1); similar to Os06g0171800 [Oryza sativa (japonica cultivar-group)] (GB:NP_001056937.1); contains InterPro domain HIRAN (InterPro:IPR014905); contains InterPro domain VRR-NUC (InterPro:IPR014883) [AT1G48360.2]	NP221220	AT1G48360.2
A_84_P840800		-1.10062		JAZ4/TIFY6A (JASMONATE-ZIM-DOMAIN PROTEIN 4) [AT1G48500.1]	NP221860	AT1G48500.1
A_84_P23161		-1.09139		phosphoethanolamine N-methyltransferase 2, putative (NMT2) [AT1G48600.1]	NP221868	AT1G48600.1
A_84_P533868			1.47433	similar to unknown protein [Arabidopsis thaliana] (TAIR:AT3G18560.1); similar to hypothetical protein [Vitis vinifera] (GB:CAN78728.1); similar to unnamed protein product [Vitis vinifera] (GB:CAO68009.1) [AT1G49000.1]	TC301273	AT1G49000.1
A_84_P586272		1.90382		unknown protein [AT1G49150.1]	NP251551	AT1G49150.1
A_84_P16258		-2.29254		zinc finger (C3HC4-type RING finger) family protein [AT1G49230.1]	TC293805	AT1G49230.1
A_84_P185004		-1.26089		cytochrome c biogenesis protein family [AT1G49380.1]	TC282204	AT1G49380.1
A_84_P126091			1.03089	LACS2 (LONG-CHAIN ACYL-COA SYNTHETASE 2) [AT1G49430.1]	TC297013	AT1G49430.1
A_84_P813787			1.19897	LACS2 (LONG-CHAIN ACYL-COA SYNTHETASE 2) [AT1G49430.1]	TC306396	AT1G49430.1
A_84_P585271		-1.23827		DNA binding / transcription factor [AT1G49475.1]	NP034006	AT1G49475.1
A_84_P17810	-1.19122			similar to unknown protein [Arabidopsis thaliana] (TAIR:AT3G19540.1); similar to unnamed protein product [Vitis vinifera] (GB:CAO70870.1); similar to hypothetical protein [Vitis vinifera] (GB:CAN68554.1); contains InterPro domain Protein of unknown function DUF620 (InterPro:IPR006873) [AT1G49840.1]	TC284873	AT1G49840.1
A_84_P729473		1.40173		TAS1B; other RNA [AT1G50055.1]	TC305453	AT1G50055.1
A_84_P17021		-1.00277		FTSH1 (FtsH protease 1); ATP-dependent peptidase/ ATPase/ metallopeptidase [AT1G50250.1]	TC300883	AT1G50250.1
A_84_P855921		-1.05099		FTSH1 (FtsH protease 1); ATP-dependent peptidase/ ATPase/ metallopeptidase [AT1G50250.1]	TC310155	AT1G50250.1
A_84_P15763		-1.13777		binding / catalytic [AT1G50450.1]	NP228270	AT1G50450.1
A_84_P21002		-1.57889		heavy-metal-associated domain-containing protein [AT1G51090.1]	TC308706	AT1G51090.1
A_84_P819611		-1.39996		plastid-lipid associated protein PAP / fibrillin family protein [AT1G51110.1]	NP306702	AT1G51110.1
A_84_P528550		-1.33288		plastid-lipid associated protein PAP / fibrillin family protein [AT1G51110.1]	TC285565	AT1G51110.1
A_84_P13436	-1.82945	-1.9336		basic helix-loop-helix (bHLH) family protein [AT1G51140.1]	TC288298	AT1G51140.1
A_84_P10418		-1.09007		lipase class 3 family protein [AT1G51440.1]	TC284280	AT1G51440.1
A_84_P18092		1.47116	1.36207	protein kinase family protein [AT1G51620.1]	NP306423	AT1G51620.1
A_84_P824506		1.44176		4CL1 (4-COUMARATE:COA LIGASE 1) [AT1G51680.3]	TC282766	AT1G51680.3
A_84_P753739		1.36929	1.14319	4CL1 (4-COUMARATE:COA LIGASE 1) [AT1G51680.3]	TC285272	AT1G51680.3
A_84_P22854		2.2598	2.0885	kinase [AT1G51790.1]	TC310582	AT1G51790.1
A_84_P10528		2.96678	2.56646	leucine-rich repeat protein kinase, putative [AT1G51800.1]	TC280931	AT1G51800.1
A_84_P752862	-1.97146	-2.24166		Encodes a defensin-like (DEFL) family protein. [AT1G51802.1]		AT1G51802.1
A_84_P16264	-2.43632	-2.33976		kinase [AT1G51810.1]	TC281650	AT1G51810.1
A_84_P13200		1.84564	2.28478	leucine-rich repeat protein kinase, putative [AT1G51820.1]	NP232362	AT1G51820.1
A_84_P21942		2.87822	3.69493	leucine-rich repeat protein kinase, putative [AT1G51850.1]	TC310718	AT1G51850.1
A_84_P20996		1.78913	1.53921	leucine-rich repeat protein kinase, putative [AT1G51860.1]	NP232365	AT1G51860.1
A_84_P17210		1.36896		leucine-rich repeat protein kinase, putative [AT1G51890.1]	TC311453	AT1G51890.1
A_84_P753747		2.82626		unknown protein [AT1G51913.1]		AT1G51913.1
A_84_P555128		2.42938		cryptdin protein-related [AT1G51915.1]	TC304220	AT1G51915.1
A_84_P541841		2.23306		unknown protein [AT1G51920.1]		AT1G51920.1
A_84_P152118		1.28649		similar to unknown protein [Arabidopsis thaliana] (TAIR:AT3G18470.1); similar to unnamed protein product [Vitis vinifera] (GB:CAO45876.1); contains InterPro domain Protein of unknown function Cys-rich (InterPro:IPR006461) [AT1G52200.1]	TC302231	AT1G52200.1
A_84_P754171			1.0484	unknown protein [AT1G52342.1]	TC305525	AT1G52342.1
A_84_P11439	-2.13648	-2.14733		26.5 kDa class I small heat shock protein-like (HSP26.5-P) [AT1G52560.1]	TC294222	AT1G52560.1
A_84_P859915			-1.23762	phospholipase/carboxylesterase family protein [AT1G52700.1]	TC312471	AT1G52700.1
A_84_P18107		1.14785	1.19062	esterase/lipase/thioesterase family protein [AT1G52760.1]	TC288129	AT1G52760.1
A_84_P13379		-1.3296		IAA6 (indoleacetic acid-induced protein 6); transcription factor [AT1G52830.1]	TC297689	AT1G52830.1
A_84_P241325		-1.47545		peroxisomal membrane protein-related [AT1G52870.1]	TC286549	AT1G52870.1
A_84_P19272	-1.13069			acetylglucosaminyltransferase [AT1G53100.1]	NP235801	AT1G53100.1
A_84_P825052		-1.00023		ATERF-8/ATERF8 (ETHYLENE RESPONSE ELEMENT BINDING FACTOR 4); DNA binding / transcription factor/ transcription repressor [AT1G53170.1]	TC295121	AT1G53170.1
A_84_P10507			1.0824	ATPPC1 (PHOSPHOENOLPYRUVATE CARBOXYLASE 1); phosphoenolpyruvate carboxylase [AT1G53310.1]	TC280718	AT1G53310.1
A_84_P816327			1.1119	ATPPC1 (PHOSPHOENOLPYRUVATE CARBOXYLASE 1); phosphoenolpyruvate carboxylase [AT1G53310.3]	TC280718	AT1G53310.3
A_84_P816338			1.32448	ATPPC1 (PHOSPHOENOLPYRUVATE CARBOXYLASE 1); phosphoenolpyruvate carboxylase [AT1G53310.3]	TC306831	AT1G53310.3
A_84_P816342			1.43214	ATPPC1 (PHOSPHOENOLPYRUVATE CARBOXYLASE 1); phosphoenolpyruvate carboxylase [AT1G53310.3]	TC306831	AT1G53310.3
A_84_P851823			1.47268	ATPPC1 (PHOSPHOENOLPYRUVATE CARBOXYLASE 1); phosphoenolpyruvate carboxylase [AT1G53310.3]	TC306831	AT1G53310.3
A_84_P816336	1.06523		1.70649	ATPPC1 (PHOSPHOENOLPYRUVATE CARBOXYLASE 1); phosphoenolpyruvate carboxylase [AT1G53310.3]	TC307817	AT1G53310.3
A_84_P856526			1.36243	ATPPC1 (PHOSPHOENOLPYRUVATE CARBOXYLASE 1); phosphoenolpyruvate carboxylase [AT1G53310.3]	TC310520	AT1G53310.3
A_84_P754007		1.15036		unknown protein [AT1G53543.1]		AT1G53543.1
A_84_P511702	1.49619	1.65944		unknown protein [AT1G53625.1]	TC306311	AT1G53625.1
A_84_P752060		1.77008		transposable element gene [AT1G53630.1]		AT1G53630.1
A_84_P753761		2.76376		unknown protein [AT1G53635.1]		AT1G53635.1
A_84_P807479	1.51388			myrosinase-associated protein, putative [AT1G54000.1]	TC304228	AT1G54000.1
A_84_P17086		-1.14631		ESP (EPITHIOSPECIFIER PROTEIN) [AT1G54040.1]	TC294364	AT1G54040.1
A_84_P204568		-1.05933		similar to unknown protein [Arabidopsis thaliana] (TAIR:AT3G14060.1); similar to unnamed protein product [Vitis vinifera] (GB:CAO45609.1) [AT1G54120.1]	TC301588	AT1G54120.1
A_84_P10469		-1.01278		CCAAT-binding transcription factor (CBF-B/NF-YA) family protein [AT1G54160.1]	TC290245	AT1G54160.1
A_84_P751343		1.27464		pseudogene, similar to vetispiradiene synthase, blastp match of 54% identity and 3.0e-79 P-value to GP [AT1G54660.1]	NP040167	AT1G54660.1
A_84_P259390		-1.38633		thylakoid lumen 18.3 kDa protein [AT1G54780.1]	TC287437	AT1G54780.1
A_84_P868614		-1.51668		thylakoid lumen 18.3 kDa protein [AT1G54780.1]	TC312842	AT1G54780.1
A_84_P23604		3.10793		late embryogenesis abundant protein-related / LEA protein-related [AT1G54890.1]	TC289665	AT1G54890.1
A_84_P833880		3.0453		late embryogenesis abundant protein-related / LEA protein-related [AT1G54890.1]	TC289665	AT1G54890.1
A_84_P856777		3.5459		late embryogenesis abundant protein-related / LEA protein-related [AT1G54890.1]	TC310672	AT1G54890.1
A_84_P19775		2.73054		similar to unknown protein [Arabidopsis thaliana] (TAIR:AT1G55240.1); similar to unnamed protein product [Vitis vinifera] (GB:CAO63741.1); contains InterPro domain Protein of unknown function DUF716 (InterPro:IPR006904) [AT1G55230.1]	TC291310	AT1G55230.1
A_84_P16933		-1.34281		oxidoreductase, 2OG-Fe(II) oxygenase family protein [AT1G55290.1]	TC289260	AT1G55290.1
A_84_P11522	-2.90503			DC1 domain-containing protein [AT1G55440.1]		AT1G55440.1
A_84_P15303		-1.65232		binding / protein binding [AT1G55480.1]	NP039120	AT1G55480.1
A_84_P753508		2.03317		other RNA [AT1G55525.1]	TC309961	AT1G55525.1
A_84_P22799		-1.413		BTB/POZ domain-containing protein [AT1G55760.1]	TC283996	AT1G55760.1
A_84_P11157	1.03999	1.7552		uracil phosphoribosyltransferase, putative / UMP pyrophosphorylase, putative / UPRTase, putative [AT1G55810.1]	NP221536	AT1G55810.1
A_84_P854939	1.04212	1.72237		uracil phosphoribosyltransferase, putative / UMP pyrophosphorylase, putative / UPRTase, putative [AT1G55810.2]	NP221536	AT1G55810.2
A_84_P21886		1.06907		AtSerat2;1 (SERINE ACETYLTRANSFERASE 1) [AT1G55920.1]	TC289978	AT1G55920.1
A_84_P23520		1.37664		leucine-rich repeat family protein / protein kinase family protein [AT1G56130.1]	NP168756	AT1G56130.1
A_84_P18118		-2.24163		nicotianamine synthase, putative [AT1G56430.1]	TC289655	AT1G56430.1
A_84_P750600		3.16197		pseudogene, pectinesterase, blastp match of 65% identity and 9.5e-47 P-value to GP [AT1G56480.1]		AT1G56480.1
A_84_P821828		-1.01581		haloacid dehalogenase-like hydrolase family protein [AT1G56500.1]	NP305870	AT1G56500.1
A_84_P788878	-1.11759			disease resistance protein (TIR-NBS-LRR class), putative [AT1G56510.1]	TC280651	AT1G56510.1
A_84_P700272	-1.2477			disease resistance protein (TIR-NBS-LRR class), putative [AT1G56510.1]		AT1G56510.1
A_84_P143829		1.12162	1.2353	similar to unknown protein [Arabidopsis thaliana] (TAIR:AT4G01220.1); similar to unnamed protein product [Vitis vinifera] (GB:CAO39698.1); similar to hypothetical protein [Vitis vinifera] (GB:CAN69309.1); contains InterPro domain Reticulon; (InterPro:IPR003388) [AT1G56550.1]	TC288165	AT1G56550.1
A_84_P17929		-1.68068		ATGOLS2 (ARABIDOPSIS THALIANA GALACTINOL SYNTHASE 2); transferase, transferring glycosyl groups / transferase, transferring hexosyl groups [AT1G56600.1]	TC286182	AT1G56600.1
A_84_P16037			1.21432	PAP1 (PRODUCTION OF ANTHOCYANIN PIGMENT 1); DNA binding / transcription factor [AT1G56650.1]	TC291247	AT1G56650.1
A_84_P121502		-1.05191		purine permease-related [AT1G57980.1]	TC287804	AT1G57980.1
A_84_P235603		1.1578		leucine-rich repeat family protein [AT1G58190.1]	NP306520	AT1G58190.1
A_84_P837084		-1.20432		similar to unknown protein [Arabidopsis thaliana] (TAIR:AT5G64460.6); similar to unknown protein [Arabidopsis thaliana] (TAIR:AT5G64460.4); similar to unknown protein [Arabidopsis thaliana] (TAIR:AT5G64460.3); similar to hypothetical protein [Vitis vinifera] (GB:CAN70041.1); contains InterPro domain Phosphoglycerate mutase (InterPro:IPR013078) [AT1G58280.1]	TC302073	AT1G58280.1
A_84_P585407		-1.34492		RXW8 [AT1G58520.1]	TC282351	AT1G58520.1
A_84_P15199	1.83082			aldo/keto reductase, putative [AT1G59950.1]	NP034681	AT1G59950.1
A_84_P831773		1.0335		similar to unknown protein [Arabidopsis thaliana] (TAIR:AT2G22795.1); similar to unnamed protein product [Vitis vinifera] (GB:CAO68771.1); similar to unknown [Populus trichocarpa] (GB:ABK93752.1); contains domain C2H2 and C2HC zinc fingers (SSF57667) [AT1G60640.2]	NP043254	AT1G60640.2
A_84_P585411		1.49302		peroxiredoxin type 2, putative [AT1G60740.1]		AT1G60740.1
A_84_P752720		-1.17431		SCRL7 (SCR-Like 7) [AT1G60989.1]		AT1G60989.1
A_84_P22715		2.29247		ANAC025 (Arabidopsis NAC domain containing protein 25); transcription factor [AT1G61110.1]	TC286621	AT1G61110.1
A_84_P21769	1.96715	1.19723		terpene synthase/cyclase family protein [AT1G61120.1]	NP043293	AT1G61120.1
A_84_P804005		1.10312		S-locus lectin protein kinase family protein [AT1G61360.1]	TC290910	AT1G61360.1
A_84_P23655		1.24077		MLO6 (MILDEW RESISTANCE LOCUS O 6); calmodulin binding [AT1G61560.1]	TC283253	AT1G61560.1
A_84_P231939		1.76051		GPT2 (glucose-6-phosphate/phosphate translocator 2); antiporter/ glucose-6-phosphate transmembrane transporter [AT1G61800.1]	TC287297	AT1G61800.1
A_84_P827147		1.76037		GPT2 (glucose-6-phosphate/phosphate translocator 2); antiporter/ glucose-6-phosphate transmembrane transporter [AT1G61800.1]	TC309257	AT1G61800.1
A_84_P551607		1.07267		BGLU45; hydrolase, hydrolyzing O-glycosyl compounds [AT1G61810.2]	NP041080	AT1G61810.2
A_84_P14235	2.32994	2.03064		BGLU46; hydrolase, hydrolyzing O-glycosyl compounds [AT1G61820.1]	TC286177	AT1G61820.1
A_84_P849757	2.13305	1.75963		BGLU46; hydrolase, hydrolyzing O-glycosyl compounds [AT1G61820.1]	TC303783	AT1G61820.1
A_84_P853675	2.17395	1.77275		BGLU46; hydrolase, hydrolyzing O-glycosyl compounds [AT1G61820.3]	TC308582	AT1G61820.3
A_84_P259470	-1.06002			MATE efflux family protein [AT1G61890.1]	TC282685	AT1G61890.1
A_84_P199334	-1.13846			similar to ankyrin repeat family protein [Arabidopsis thaliana] (TAIR:AT1G11740.1); similar to unnamed protein product [Vitis vinifera] (GB:CAO21232.1); contains InterPro domain Ankyrin (InterPro:IPR002110) [AT1G62050.1]	NP041101	AT1G62050.1
A_84_P592544		-1.14464		mitochondrial transcription termination factor-related / mTERF-related [AT1G62120.1]	NP043901	AT1G62120.1
A_84_P839263		-1.11165		aspartyl protease family protein [AT1G62290.1]	NP043914	AT1G62290.1
A_84_P846303		1.18652		WRKY6 (WRKY DNA-binding protein 6); transcription factor [AT1G62300.1]	TC296064	AT1G62300.1
A_84_P19888		1.01402		WRKY6 (WRKY DNA-binding protein 6); transcription factor [AT1G62300.1]	TC300790	AT1G62300.1
A_84_P19094		3.51436		STM (SHOOT MERISTEMLESS); transcription factor [AT1G62360.1]	TC304122	AT1G62360.1
A_84_P752326		1.62934		similar to unknown protein [Arabidopsis thaliana] (TAIR:AT1G12030.1); similar to Protein of unknown function DUF506, plant [Medicago truncatula] (GB:ABN05810.1); contains InterPro domain Protein of unknown function DUF506, plant (InterPro:IPR006502) [AT1G62420.1]	TC289766	AT1G62420.1
A_84_P11357		5.10505		protease inhibitor/seed storage/lipid transfer protein (LTP) family protein [AT1G62500.1]	TC306115	AT1G62500.1
A_84_P16082		-1.33775		flavin-containing monooxygenase family protein / FMO family protein [AT1G62540.1]	TC285865	AT1G62540.1
A_84_P829045		-1.36179		flavin-containing monooxygenase family protein / FMO family protein [AT1G62540.1]	TC312185	AT1G62540.1
A_84_P17974		-1.25144		flavin-containing monooxygenase family protein / FMO family protein [AT1G62570.1]	NP033988	AT1G62570.1
A_84_P18655		-1.28393		BETA-VPE (vacuolar processing enzyme beta); cysteine-type endopeptidase [AT1G62710.1]	NP173293	AT1G62710.1
A_84_P18892		1.62129	3.08592	invertase/pectin methylesterase inhibitor family protein [AT1G62760.1]	NP173290	AT1G62760.1
A_84_P16547		-1.01047		KNAT7 (Knotted-like Arabidopsis thaliana); DNA binding / transcription factor [AT1G62990.1]	TC311433	AT1G62990.1
A_84_P822062		-1.13187		ATRBL2 (ARABIDOPSIS THALIANA RHOMBOID-LIKE 2); serine-type endopeptidase [AT1G63120.1]	TC300214	AT1G63120.1
A_84_P859203		-1.07837		ATRBL2 (ARABIDOPSIS THALIANA RHOMBOID-LIKE 2); serine-type endopeptidase [AT1G63120.1]	TC312033	AT1G63120.1
A_84_P234129		1.21113	1.26291	CLE14 (CLAVATA3/ESR-RELATED 14); receptor binding [AT1G63245.1]		AT1G63245.1
A_84_P22903		1.92683		catalytic [AT1G63450.1]	NP184460	AT1G63450.1
A_84_P839984		1.44555		protein kinase-related [AT1G63580.1]	NP184469	AT1G63580.1
A_84_P20057			1.74257	protein kinase-related [AT1G63580.1]		AT1G63580.1
A_84_P23777		-1.12409		disease resistance protein (TIR-NBS-LRR class), putative [AT1G63880.1]	TC280629	AT1G63880.1
A_84_P503753	-1.42545			similar to unknown protein [Arabidopsis thaliana] (TAIR:AT4G23530.1); similar to hypothetical protein [Vitis vinifera] (GB:CAN64338.1); contains InterPro domain Protein of unknown function DUF793 (InterPro:IPR008511) [AT1G63930.1]	TC286096	AT1G63930.1
A_84_P23860	-2.29743			AAA-type ATPase family protein [AT1G64110.1]	NP173659	AT1G64110.1
A_84_P826232	-2.18758			AAA-type ATPase family protein [AT1G64110.2]	NP173659	AT1G64110.2
A_84_P21020		-1.18706		similar to unknown protein [Arabidopsis thaliana] (TAIR:AT4G13590.1); similar to unnamed protein product [Vitis vinifera] (GB:CAO65879.1); contains InterPro domain Protein of unknown function UPF0016; (InterPro:IPR001727) [AT1G64150.1]	NP173657	AT1G64150.1
A_84_P869560		-1.44743		similar to unknown protein [Arabidopsis thaliana] (TAIR:AT4G13590.1); similar to unnamed protein product [Vitis vinifera] (GB:CAO65879.1); contains InterPro domain Protein of unknown function UPF0016; (InterPro:IPR001727) [AT1G64150.1]	NP173657	AT1G64150.1
A_84_P11564		4.12142		disease resistance-responsive family protein / dirigent family protein [AT1G64160.1]	TC293668	AT1G64160.1
A_84_P11371		-1.8019		similar to unknown protein [Arabidopsis thaliana] (TAIR:AT1G03055.1); similar to unnamed protein product [Vitis vinifera] (GB:CAO62908.1) [AT1G64680.1]	TC293350	AT1G64680.1
A_84_P18984	-1.20081	-1.48138		glycosyl hydrolase family 17 protein [AT1G64760.1]	TC306537	AT1G64760.1
A_84_P751425		-1.51282		carbohydrate binding / catalytic [AT1G64770.1]	NP034740	AT1G64770.1
A_84_P820856		-1.56625		carbohydrate binding / catalytic [AT1G64770.2]	NP034740	AT1G64770.2
A_84_P20876		-1.30047		ATAMT1;2 (AMMONIUM TRANSPORTER 1;2); ammonium transmembrane transporter [AT1G64780.1]	TC283042	AT1G64780.1
A_84_P86019		-1.00916		integral membrane transporter family protein [AT1G64890.1]	TC284472	AT1G64890.1
A_84_P822038	-1.02203	-1.15363		integral membrane transporter family protein [AT1G64890.1]	TC311815	AT1G64890.1
A_84_P869509		-1.23699		integral membrane transporter family protein [AT1G64890.1]	TC311815	AT1G64890.1
A_84_P597003		-1.04161		similar to unnamed protein product [Vitis vinifera] (GB:CAO62125.1); contains domain SSF53448 (SSF53448) [AT1G64980.1]	TC292966	AT1G64980.1
A_84_P826969		1.0123		transducin family protein / WD-40 repeat family protein [AT1G65030.1]	TC313530	AT1G65030.1
A_84_P146418		-1.94455		similar to hypothetical protein [Vitis vinifera] (GB:CAN76393.1) [AT1G65230.1]	TC290492	AT1G65230.1
A_84_P297064	1.15919			ATXTH17 (XYLOGLUCAN ENDOTRANSGLUCOSYLASE/HYDROLASE 17); hydrolase, acting on glycosyl bonds [AT1G65310.1]	TC291995	AT1G65310.1
A_84_P754300	2.79943	3.69598	2.22016	other RNA [AT1G65481.1]	NP966021	AT1G65481.1
A_84_P754435			1.74896	similar to unknown protein [Arabidopsis thaliana] (TAIR:AT1G65500.1) [AT1G65486.1]		AT1G65486.1
A_84_P18947		1.10385		enoyl-CoA hydratase/isomerase family protein [AT1G65520.1]	TC293819	AT1G65520.1
A_84_P822127		-1.05315		ATHEX1/HEXO3 (BETA-HEXOSAMINIDASE 3); beta-N-acetylhexosaminidase/ hexosaminidase [AT1G65590.1]	NP043881	AT1G65590.1
A_84_P16072	1.52213	2.03058	1.87401	harpin-induced protein-related / HIN1-related / harpin-responsive protein-related [AT1G65690.1]	NP173446	AT1G65690.1
A_84_P18033		1.09818		similar to unknown protein [Arabidopsis thaliana] (TAIR:AT5G37010.1); similar to hypothetical protein [Vitis vinifera] (GB:CAN76723.1) [AT1G65710.1]	NP1337079	AT1G65710.1
A_84_P11417	1.96641	1.8279		YSL7 (YELLOW STRIPE LIKE 7); oligopeptide transporter [AT1G65730.1]	TC281586	AT1G65730.1
A_84_P586318			1.97741	unknown protein [AT1G65845.1]	TC307014	AT1G65845.1
A_84_P827867			1.67568	BZO1; benzoate-CoA ligase [AT1G65880.1]	TC308076	AT1G65880.1
A_84_P10495			1.63092	acyl-activating enzyme 12 (AAE12) [AT1G65890.1]	TC283339	AT1G65890.1
A_84_P169033	1.68127	1.96489	2.28272	TPX2 (THIOREDOXIN-DEPENDENT PEROXIDASE 2); antioxidant [AT1G65970.1]		AT1G65970.1
A_84_P20958		-1.14788		oxidoreductase N-terminal domain-containing protein [AT1G66130.1]	TC290237	AT1G66130.1
A_84_P810483			1.00837	ATGSR2 (Arabidopsis thaliana glutamine synthase clone R2); glutamate-ammonia ligase [AT1G66200.2]	TC301991	AT1G66200.2
A_84_P11390	3.22511			glycosyl hydrolase family 1 protein [AT1G66280.1]	TC284368	AT1G66280.1
A_84_P21851		2.64227		MYB113 (myb domain protein 113); DNA binding / transcription factor [AT1G66370.1]	TC293550	AT1G66370.1
A_84_P22817		1.19875		protein kinase family protein [AT1G66460.1]	TC308223	AT1G66460.1
A_84_P12282	-1.1623			seven in absentia (SINA) protein, putative [AT1G66650.1]	NP306799	AT1G66650.1
A_84_P14305	1.83512	1.91429		MATE efflux family protein [AT1G66780.1]	NP313576	AT1G66780.1
A_84_P20016			1.52361	leucine-rich repeat transmembrane protein kinase, putative [AT1G66830.1]	TC299472	AT1G66830.1
A_84_P23763		4.64851		protease inhibitor/seed storage/lipid transfer protein (LTP) family protein [AT1G66850.1]	TC302972	AT1G66850.1
A_84_P21944			2.10408	serine/threonine protein kinase family protein [AT1G66930.1]		AT1G66930.1
A_84_P310353	-1.40264			protein kinase-related [AT1G66940.1]	TC281770	AT1G66940.1
A_84_P838135	1.51152	1.271		ATPDR11/PDR11 (PLEIOTROPIC DRUG RESISTANCE 11); ATPase, coupled to transmembrane movement of substances [AT1G66950.1]	NP306648	AT1G66950.1
A_84_P17183		2.97338		DIN9 (DARK INDUCIBLE 9); mannose-6-phosphate isomerase [AT1G67070.1]	TC285495	AT1G67070.1
A_84_P842072	-1.73903		-1.3717	ASY1 (ASYNAPTIC 1); DNA binding [AT1G67370.1]	NP232384	AT1G67370.1
A_84_P164373	1.04827	1.27093		kelch repeat-containing F-box family protein [AT1G67480.1]	TC308785	AT1G67480.1
A_84_P837798	1.18587	1.22786		kelch repeat-containing F-box family protein [AT1G67480.1]	TC310996	AT1G67480.1
A_84_P287320			2.38256	similar to phosphatidylinositol 3- and 4-kinase family protein [Arabidopsis thaliana] (TAIR:AT1G27570.1); contains domain PTHR15245:SF11 (PTHR15245:SF11); contains domain PTHR15245 (PTHR15245) [AT1G67635.1]	NP1098034	AT1G67635.1
A_84_P752083	-1.63352			unknown protein [AT1G67855.1]		AT1G67855.1
A_84_P18111		1.69019		CCoAMT (caffeoyl-CoA 3-O-methyltransferase); caffeoyl-CoA O-methyltransferase [AT1G67980.1]	TC295178	AT1G67980.1
A_84_P15273		-1.39124		HPR (HYDROXYPYRUVATE REDUCTASE); glycerate dehydrogenase/ poly(U) binding [AT1G68010.1]	TC308697	AT1G68010.1
A_84_P854905		-1.27013		HPR (HYDROXYPYRUVATE REDUCTASE); glycerate dehydrogenase/ poly(U) binding [AT1G68010.1]	TC309558	AT1G68010.1
A_84_P19991		4.02432	3.70662	WRKY9 (WRKY DNA-binding protein 9); transcription factor [AT1G68150.1]	TC288834	AT1G68150.1
A_84_P754415		1.64536		unknown protein [AT1G68238.1]		AT1G68238.1
A_84_P772807		-1.36284		contains InterPro domain Basic helix-loop-helix dimerisation region bHLH; (InterPro:IPR001092); contains InterPro domain Helix-loop-helix DNA-binding; (InterPro:IPR011598) [AT1G68240.2]	NP1337075	AT1G68240.2
A_84_P16207		-1.20724	-1.23391	zinc finger protein-related [AT1G68360.1]	NP307444	AT1G68360.1
A_84_P249125		-1.23785		similar to hypothetical protein [Vitis vinifera] (GB:CAN66643.1) [AT1G68500.1]	TC306879	AT1G68500.1
A_84_P18751	-1.38313	-1.12877		proton-dependent oligopeptide transport (POT) family protein [AT1G68570.1]	TC283072	AT1G68570.1
A_84_P12113		-1.57531		similar to unknown protein [Arabidopsis thaliana] (TAIR:AT1G25480.1); similar to unknown protein [Arabidopsis thaliana] (TAIR:AT2G17470.1); similar to unnamed protein product [Vitis vinifera] (GB:CAO42118.1); contains InterPro domain Protein of unknown function UPF0005 (InterPro:IPR006214) [AT1G68600.1]	TC284044	AT1G68600.1
A_84_P848977		-1.90438		similar to unknown protein [Arabidopsis thaliana] (TAIR:AT1G25480.1); similar to unknown protein [Arabidopsis thaliana] (TAIR:AT2G17470.1); similar to unnamed protein product [Vitis vinifera] (GB:CAO42118.1); contains InterPro domain Protein of unknown function UPF0005 (InterPro:IPR006214) [AT1G68600.1]	TC302288	AT1G68600.1
A_84_P19990			-1.463	basic helix-loop-helix (bHLH) family protein [AT1G68810.1]	TC301141	AT1G68810.1
A_84_P753030			2.41353	DVL5/RTFL15 (ROTUNDIFOLIA LIKE 15) [AT1G68825.1]	TC302744	AT1G68825.1
A_84_P597910		-2.4365		similar to unknown protein [Arabidopsis thaliana] (TAIR:AT1G26210.1) [AT1G68870.1]	TC302663	AT1G68870.1
A_84_P17164		3.30876		ATBZIP (ARABIDOPSIS THALIANA BASIC LEUCINE-ZIPPER 8); DNA binding / transcription factor [AT1G68880.1]	TC304217	AT1G68880.1
A_84_P107092		2.09729		unknown protein [AT1G69050.1]	TC301520	AT1G69050.1
A_84_P14181		3.81867		AP1 (APETALA1); DNA binding / transcription factor [AT1G69120.1]	TC299670	AT1G69120.1
A_84_P839806		-1.05423		other RNA [AT1G69252.1]	NP173995	AT1G69252.1
A_84_P706132		-1.11638		other RNA [AT1G69252.1]	TC310106	AT1G69252.1
A_84_P560506	-1.0068			similar to unknown protein [Arabidopsis thaliana] (TAIR:AT1G26650.1); similar to unnamed protein product [Vitis vinifera] (GB:CAO68474.1) [AT1G69430.1]	TC289594	AT1G69430.1
A_84_P843261		1.71337		UbiE/COQ5 methyltransferase family protein [AT1G69523.1]	NP313571	AT1G69523.1
A_84_P593458		1.77318		UbiE/COQ5 methyltransferase family protein [AT1G69523.1]	TC290300	AT1G69523.1
A_84_P587219		1.72673	1.52613	UbiE/COQ5 methyltransferase family protein [AT1G69526.1]	TC286971	AT1G69526.1
A_84_P19046		1.82821		ATGSTU12 (Arabidopsis thaliana Glutathione S-transferase (class tau) 12); glutathione transferase [AT1G69920.1]	TC293176	AT1G69920.1
A_84_P754785		-1.05535		CLE26 (CLAVATA3/ESR-RELATED 26) [AT1G69970.2]	NP043799	AT1G69970.2
A_84_P16105	-1.4298			terpene synthase/cyclase family protein [AT1G70080.1]	NP043789	AT1G70080.1
A_84_P14214	-1.04282			similar to unknown protein [Arabidopsis thaliana] (TAIR:AT1G24160.1); similar to unnamed protein product [Vitis vinifera] (GB:CAO40971.1) [AT1G70100.1]	TC299563	AT1G70100.1
A_84_P10433	1.51084	1.70203	1.96224	ATFH8 (FORMIN 8); actin binding / actin filament binding / profilin binding [AT1G70140.1]	TC296895	AT1G70140.1
A_84_P830413	1.48904	1.78516	2.04056	ATFH8 (FORMIN 8); actin binding / actin filament binding / profilin binding [AT1G70140.1]	TC296895	AT1G70140.1
A_84_P22726			1.28252	MMP (MATRIX METALLOPROTEINASE); metalloendopeptidase [AT1G70170.1]	TC290768	AT1G70170.1
A_84_P14215	-1.05672			CYCD1;1 (CYCLIN D1;1); cyclin-dependent protein kinase regulator [AT1G70210.1]	TC305334	AT1G70210.1
A_84_P839203		-1.37636		nodulin MtN21 family protein [AT1G70260.1]	NP043774	AT1G70260.1
A_84_P739644		-2.44792		nodulin MtN21 family protein [AT1G70260.1]		AT1G70260.1
A_84_P18106		-1.12585		AOAT2 (GLUTAMATE:GLYOXYLATE AMINOTRANSFERASE 2); alanine transaminase [AT1G70580.1]	TC283102	AT1G70580.1
A_84_P810735	-1.01957	-1.04687		AOAT2 (GLUTAMATE:GLYOXYLATE AMINOTRANSFERASE 2); alanine transaminase [AT1G70580.2]	TC308018	AT1G70580.2
A_84_P810730		-1.15122		AOAT2 (GLUTAMATE:GLYOXYLATE AMINOTRANSFERASE 2); alanine transaminase [AT1G70580.2]	TC309626	AT1G70580.2
A_84_P14323		-1.57587		caleosin-related family protein [AT1G70680.1]	TC291436	AT1G70680.1
A_84_P849831		-2.06832		inorganic carbon transport protein-related [AT1G70760.1]	TC303881	AT1G70760.1
A_84_P750407		-2.02627		inorganic carbon transport protein-related [AT1G70760.1]		AT1G70760.1
A_84_P753793			-1.08305	MLP28 (MLP-LIKE PROTEIN 28) [AT1G70830.4]	TC297042	AT1G70830.4
A_84_P808187		-1.14427		MLP34 (MLP-LIKE PROTEIN 34) [AT1G70850.3]	TC304964	AT1G70850.3
A_84_P125241		1.09715		CLE17 (CLAVATA3/ESR-RELATED 17); receptor binding [AT1G70895.1]	TC293716	AT1G70895.1
A_84_P94079		-1.06399		similar to unknown protein [Arabidopsis thaliana] (TAIR:AT1G23110.3); similar to unknown protein [Arabidopsis thaliana] (TAIR:AT1G23110.1); similar to unknown protein [Arabidopsis thaliana] (TAIR:AT1G23110.2); similar to hypothetical protein [Vitis vinifera] (GB:CAN77015.1) [AT1G70900.1]	TC288721	AT1G70900.1
A_84_P845195		-1.26406		similar to unknown protein [Arabidopsis thaliana] (TAIR:AT1G23110.3); similar to unknown protein [Arabidopsis thaliana] (TAIR:AT1G23110.1); similar to unknown protein [Arabidopsis thaliana] (TAIR:AT1G23110.2); similar to hypothetical protein [Vitis vinifera] (GB:CAN77015.1) [AT1G70900.1]	TC288721	AT1G70900.1
A_84_P556074		-2.17821		hydroxyproline-rich glycoprotein family protein [AT1G70985.1]	TC296628	AT1G70985.1
A_84_P795468		1.14181		RSW10 (RADIAL SWELLING 10); ribose-5-phosphate isomerase [AT1G71100.1]	TC303512	AT1G71100.1
A_84_P513315	-1.33839			basic helix-loop-helix (bHLH) family protein [AT1G71200.1]	NP305677	AT1G71200.1
A_84_P20789		1.83583		disease resistance family protein / LRR family protein [AT1G71400.1]	TC298641	AT1G71400.1
A_84_P12472		-1.02118		inositol polyphosphate 5-phosphatase, putative [AT1G71710.1]	TC283761	AT1G71710.1
A_84_P19024		1.34979		SUC1 (SUCROSE-PROTON SYMPORTER 1); carbohydrate transmembrane transporter/ sucrose:hydrogen symporter/ sugar:hydrogen ion symporter [AT1G71880.1]	TC283775	AT1G71880.1
A_84_P12451	-1.96226	-1.77381		late embryogenesis abundant domain-containing protein / LEA domain-containing protein [AT1G72100.1]	TC285543	AT1G72100.1
A_84_P16227		-1.4284		zinc finger (C3HC4-type RING finger) family protein [AT1G72200.1]	TC286743	AT1G72200.1
A_84_P21584		-1.07811		basic helix-loop-helix (bHLH) family protein (bHLH096) [AT1G72210.1]	TC301894	AT1G72210.1
A_84_P11184	-1.19845			similar to unknown protein [Arabidopsis thaliana] (TAIR:AT1G22470.1) [AT1G72240.1]	TC306540	AT1G72240.1
A_84_P789698	-2.13041			heat shock protein binding [AT1G72416.1]	TC296160	AT1G72416.1
A_84_P802561		-1.3358		GLP1 (GERMIN-LIKE PROTEIN 1); manganese ion binding / metal ion binding / nutrient reservoir [AT1G72610.1]	TC291847	AT1G72610.1
A_84_P20950		-1.20707		GLP1 (GERMIN-LIKE PROTEIN 1); manganese ion binding / metal ion binding / nutrient reservoir [AT1G72610.1]	TC306885	AT1G72610.1
A_84_P529493	-2.00648	-1.52495		hydrolase, alpha/beta fold family protein [AT1G72620.1]	NP305520	AT1G72620.1
A_84_P517092		-1.25721		binding / catalytic [AT1G72640.1]	TC291020	AT1G72640.1
A_84_P542792		-1.0156		IQD8 (IQ-domain 8); calmodulin binding [AT1G72670.1]	TC287480	AT1G72670.1
A_84_P12440	-1.08977			HAB1 (HOMOLOGY TO ABI1); protein serine/threonine phosphatase [AT1G72770.1]	TC284691	AT1G72770.1
A_84_P856377		1.72277		disease resistance protein (TIR-NBS class), putative [AT1G72900.1]	TC310448	AT1G72900.1
A_84_P751526		1.772		disease resistance protein (TIR-NBS class), putative [AT1G72920.1]	TC294166	AT1G72920.1
A_84_P20890		1.64246		disease resistance protein (TIR-NBS class), putative [AT1G72920.1]	TC294166	AT1G72920.1
A_84_P819483		1.19213		disease resistance protein (TIR-NBS class), putative [AT1G72920.1]	TC294166	AT1G72920.1
A_84_P21836		1.15014		disease resistance protein (TIR-NBS class), putative [AT1G72940.1]	TC309229	AT1G72940.1
A_84_P11435	-1.09049			HTH (HOTHEAD); aldehyde-lyase [AT1G72970.1]	TC306353	AT1G72970.1
A_84_P173571			2.31209	CLE1 (CLAVATA3/ESR-RELATED 1); receptor binding [AT1G73165.1]		AT1G73165.1
A_84_P14326	-1.92868			ATOCT1 (ARABIDOPSIS THALIANA ORGANIC CATION/CARNITINE TRANSPORTER1); carbohydrate transmembrane transporter/ carnitine transporter/ transporter [AT1G73220.1]	TC284002	AT1G73220.1
A_84_P22839		2.31152	2.79877	trypsin and protease inhibitor family protein / Kunitz family protein [AT1G73260.1]	TC293609	AT1G73260.1
A_84_P16271		-1.72597		ATDR4 (Arabidopsis thaliana drought-repressed 4) [AT1G73330.1]	TC306038	AT1G73330.1
A_84_P856876		-2.16753		ATDR4 (Arabidopsis thaliana drought-repressed 4) [AT1G73330.1]	TC310727	AT1G73330.1
A_84_P797654	-2.46863	-1.49575		unknown protein [AT1G73510.1]	TC301429	AT1G73510.1
A_84_P602371	-2.56695	-1.50539		unknown protein [AT1G73510.1]	TC301429	AT1G73510.1
A_84_P14954		-2.27508		phosphoethanolamine N-methyltransferase [AT1G73600.1]	TC298622	AT1G73600.1
A_84_P274730		1.97089	1.0706	CLE13 (CLAVATA3/ESR-RELATED 13); receptor binding [AT1G73965.1]	TC295501	AT1G73965.1
A_84_P13373	2.62731	2.00343		SS3 (STRICTOSIDINE SYNTHASE 3) [AT1G74000.1]	TC290574	AT1G74000.1
A_84_P830941		1.72173		SS3 (STRICTOSIDINE SYNTHASE 3) [AT1G74000.1]	TC301106	AT1G74000.1
A_84_P12428	2.29094	1.8067		strictosidine synthase family protein [AT1G74010.1]	TC287416	AT1G74010.1
A_84_P11483		1.01375		SS2 (STRICTOSIDINE SYNTHASE 2); strictosidine synthase [AT1G74020.1]	TC289716	AT1G74020.1
A_84_P850462			1.06173	SS2 (STRICTOSIDINE SYNTHASE 2); strictosidine synthase [AT1G74020.1]	TC305085	AT1G74020.1
A_84_P19047		1.16879		sulfotransferase family protein [AT1G74100.1]	TC286420	AT1G74100.1
A_84_P12432		1.51974		ATGSTU10 (Arabidopsis thaliana Glutathione S-transferase (class tau) 10); glutathione transferase [AT1G74590.1]	TC290926	AT1G74590.1
A_84_P19997		-3.3677		gibberellin-responsive protein, putative [AT1G74670.1]	TC299095	AT1G74670.1
A_84_P151108		-1.20078		NDH-O (NAD(P)H:PLASTOQUINONE DEHYDROGENASE COMPLEX SUBUNIT O) [AT1G74880.1]	TC297945	AT1G74880.1
A_84_P812143		-1.53348	-1.14191	NDH-O (NAD(P)H:PLASTOQUINONE DEHYDROGENASE COMPLEX SUBUNIT O) [AT1G74880.1]	TC297945	AT1G74880.1
A_84_P820520		-1.03211		senescence-associated protein-related [AT1G74940.1]	TC308245	AT1G74940.1
A_84_P103346		-1.19098		senescence-associated protein-related [AT1G74940.1]	TC308245	AT1G74940.1
A_84_P206918		-1.16981		JAC1 (J-DOMAIN PROTEIN REQUIRED FOR CHLOROPLAST ACCUMULATION RESPONSE 1); heat shock protein binding [AT1G75100.1]	TC282088	AT1G75100.1
A_84_P18125		-1.09784		isoflavone reductase, putative [AT1G75280.1]	TC300157	AT1G75280.1
A_84_P258120		-2.00998	-2.13469	LCR67/PDF1.1 (Low-molecular-weight cysteine-rich 67) [AT1G75830.1]	TC303895	AT1G75830.1
A_84_P309203		1.00912		Identical to Uncharacterized protein At1g76070 [Arabidopsis Thaliana] (GB:Q9SGS5;GB:Q8LAC9;GB:Q9LQR1); similar to unknown protein [Arabidopsis thaliana] (TAIR:AT1G20310.1); similar to hypothetical protein [Vitis vinifera] (GB:CAN83887.1) [AT1G76070.1]	TC292405	AT1G76070.1
A_84_P584570	-2.13438	-2.16928		similar to unknown protein [Arabidopsis thaliana] (TAIR:AT1G20520.1); similar to hypothetical protein [Vitis vinifera] (GB:CAN69930.1); contains InterPro domain Protein of unknown function DUF241, plant (InterPro:IPR004320) [AT1G76210.1]	TC294597	AT1G76210.1
A_84_P20919		1.27461		pyrophosphate--fructose-6-phosphate 1-phosphotransferase alpha subunit, putative / pyrophosphate-dependent 6-phosphofructose-1-kinase, putative [AT1G76550.1]	TC290933	AT1G76550.1
A_84_P194124		1.1437		CP12-3 [AT1G76560.1]	TC296958	AT1G76560.1
A_84_P18113	2.58186	1.76382		calmodulin-related protein, putative [AT1G76640.1]	TC301077	AT1G76640.1
A_84_P19059		-1.11129		5-formyltetrahydrofolate cyclo-ligase family protein [AT1G76730.1]	TC287587	AT1G76730.1
A_84_P22843	1.98961			O-methyltransferase family 2 protein [AT1G76790.1]	TC287776	AT1G76790.1
A_84_P830829		-1.25959		DNAJ heat shock N-terminal domain-containing protein [AT1G77020.1]	TC298611	AT1G77020.1
A_84_P556095		1.06093		glycine-rich protein [AT1G77030.1]		AT1G77030.1
A_84_P22712		-1.04998		thylakoid lumenal 29.8 kDa protein [AT1G77090.1]	TC311242	AT1G77090.1
A_84_P753635		1.30308		MIR402; miRNA [AT1G77235.1]		AT1G77235.1
A_84_P512655		-1.74806		AP2 domain-containing transcription factor, putative [AT1G77640.1]	TC293649	AT1G77640.1
A_84_P754792			1.03661	unknown protein [AT1G77765.4]	NP1097990	AT1G77765.4
A_84_P11438		1.83937		SULTR1;2 (SULFATE TRANSPORTER 1;2); sulfate transmembrane transporter [AT1G78000.1]	NP169028	AT1G78000.1
A_84_P853815		1.66869		SULTR1;2 (SULFATE TRANSPORTER 1;2); sulfate transmembrane transporter [AT1G78000.1]	NP169028	AT1G78000.1
A_84_P785283	-1.17385			WD-40 repeat family protein [AT1G78070.1]	NP169033	AT1G78070.1
A_84_P806824		1.14408		hydrolase, alpha/beta fold family protein [AT1G78210.1]	NP305301	AT1G78210.1
A_84_P147748		1.09894		hydrolase, alpha/beta fold family protein [AT1G78210.1]	TC290448	AT1G78210.1
A_84_P10505	-1.49952			serine/threonine protein kinase, putative [AT1G78290.2]	TC298065	AT1G78290.2
A_84_P852521	-1.45242			serine/threonine protein kinase, putative [AT1G78290.2]	TC307599	AT1G78290.2
A_84_P260410		-2.978		SOUL heme-binding family protein [AT1G78450.1]	TC293084	AT1G78450.1
A_84_P21802			1.68683	pathogenesis-related family protein [AT1G78780.1]	NP039521	AT1G78780.1
A_84_P824861	-1.58906			GA2 (GA REQUIRING 2); ent-kaurene synthase [AT1G79460.1]	TC298555	AT1G79460.1
A_84_P10472	-1.64756			GA2 (GA REQUIRING 2); ent-kaurene synthase [AT1G79460.1]	TC298555	AT1G79460.1
A_84_P12477	1.31687	1.92717		wall-associated kinase, putative [AT1G79680.1]	TC281285	AT1G79680.1
A_84_P810381		1.04742		HSP91 (Heat shock protein 91) [AT1G79930.1]	TC303663	AT1G79930.1
A_84_P857022	1.26034			kelch repeat-containing F-box family protein [AT1G80440.1]	TC310802	AT1G80440.1
A_84_P582789		1.53347		VQ motif-containing protein [AT1G80450.1]	TC298683	AT1G80450.1
A_84_P814542	1.31081	1.30851	1.3424	NHO1 (NONHOST RESISTANCE TO P. S. PHASEOLICOLA 1); carbohydrate kinase [AT1G80460.2]	TC305949	AT1G80460.2
A_84_P17170		3.50231		WRKY66 (WRKY DNA-binding protein 66); transcription factor [AT1G80590.1]	NP173959	AT1G80590.1
A_84_P751739		1.43837		transducin family protein / WD-40 repeat family protein [AT1G80710.1]	NP184164	AT1G80710.1
A_84_P147538		2.12014		unknown protein [AT1G80865.1]	TC295515	AT1G80865.1
A_84_P17337		-1.18938		RHA2B (RING-H2 FINGER PROTEIN 2B); protein binding / zinc ion binding [AT2G01150.1]	TC313806	AT2G01150.1
A_84_P799971	1.11958	1.24508		similar to unknown protein [Arabidopsis thaliana] (TAIR:AT1G71015.1); similar to unknown [Glycine max] (GB:AAG38147.1); contains InterPro domain Trigger factor, C-terminal, bacterial; (InterPro:IPR008880) [AT2G01340.1]	NP454716	AT2G01340.1
A_84_P843544		1.01948		similar to unknown protein [Arabidopsis thaliana] (TAIR:AT1G71015.1); similar to unknown [Glycine max] (GB:AAG38147.1); contains InterPro domain Trigger factor, C-terminal, bacterial; (InterPro:IPR008880) [AT2G01340.1]	NP454716	AT2G01340.1
A_84_P756116		1.06218		similar to unknown protein [Arabidopsis thaliana] (TAIR:AT1G71015.1); similar to unknown [Glycine max] (GB:AAG38147.1); contains InterPro domain Trigger factor, C-terminal, bacterial; (InterPro:IPR008880) [AT2G01340.1]	TC300082	AT2G01340.1
A_84_P17272		-1.45413		PIN4 (PIN-FORMED 4); auxin:hydrogen symporter/ transporter [AT2G01420.1]	TC281429	AT2G01420.1
A_84_P126931	-1.2043			CLE16 (CLAVATA3/ESR-RELATED 16); receptor binding [AT2G01505.1]	TC309748	AT2G01505.1
A_84_P218248		-2.51667		similar to unnamed protein product [Vitis vinifera] (GB:CAO42320.1) [AT2G01590.1]	TC294044	AT2G01590.1
A_84_P784848		-1.12599		WOL (WOODEN LEG) [AT2G01830.1]	NP299382	AT2G01830.1
A_84_P116602			-1.13315	WOL (WOODEN LEG) [AT2G01830.1]	NP299382	AT2G01830.1
A_84_P707913		-1.05475		calcium ion binding [AT2G01918.1]		AT2G01918.1
A_84_P523321		1.41518		epsin N-terminal homology (ENTH) domain-containing protein / clathrin assembly protein-related [AT2G01920.1]	TC290869	AT2G01920.1
A_84_P757250		-1.6776		Encodes a member of a family of small,secreted, cysteine rich protein with sequence similarity to the PCP (pollen coat protein) gene family. [AT2G02135.1]		AT2G02135.1
A_84_P18234	2.09442	2.47503		ATPP2-B6 (Phloem protein 2-B6); carbohydrate binding [AT2G02310.1]	NP455580	AT2G02310.1
A_84_P755439		1.11977		pseudogene, similar to P0443G08.20, blastp match of 37% identity and 7.2e-16 P-value to GP [AT2G02330.1]		AT2G02330.1
A_84_P88649		1.19902	1.46868	ARPN (PLANTACYANIN); copper ion binding [AT2G02850.1]	TC300377	AT2G02850.1
A_84_P288954	-1.29114			heat shock protein-related [AT2G03020.1]	NP456401	AT2G03020.1
A_84_P14510			-1.54789	ATEXPA15 (ARABIDOPSIS THALIANA EXPANSIN A15) [AT2G03090.1]	TC292775	AT2G03090.1
A_84_P827084	-1.14561			similar to expressed protein [Oryza sativa (japonica cultivar-group)] (GB:ABF94594.1); similar to hypothetical protein OsI_010237 [Oryza sativa (indica cultivar-group)] (GB:EAY89004.1) [AT2G03420.1]	TC296413	AT2G03420.1
A_84_P61170	-1.22067			similar to expressed protein [Oryza sativa (japonica cultivar-group)] (GB:ABF94594.1); similar to hypothetical protein OsI_010237 [Oryza sativa (indica cultivar-group)] (GB:EAY89004.1) [AT2G03420.1]	TC296413	AT2G03420.1
A_84_P585488		1.38377		18S pre-ribosomal assembly protein gar2-related [AT2G03810.1]	TC286774	AT2G03810.1
A_84_P804686		1.19831		18S pre-ribosomal assembly protein gar2-related [AT2G03810.2]	TC286944	AT2G03810.2
A_84_P58520		-1.31666		similar to unnamed protein product [Vitis vinifera] (GB:CAO41070.1) [AT2G04039.1]	TC296833	AT2G04039.1
A_84_P813108		-1.35626		similar to unnamed protein product [Vitis vinifera] (GB:CAO41070.1) [AT2G04039.2]	TC296833	AT2G04039.2
A_84_P120372		2.52986		ATDTX1; antiporter/ multidrug efflux pump/ multidrug transporter/ transporter [AT2G04040.1]	TC285647	AT2G04040.1
A_84_P600633		1.2481		MATE efflux family protein [AT2G04050.1]	TC303235	AT2G04050.1
A_84_P756195		1.9067		transporter [AT2G04070.1]		AT2G04070.1
A_84_P796985		1.09975		meprin and TRAF homology domain-containing protein / MATH domain-containing protein [AT2G04170.2]	TC287308	AT2G04170.2
A_84_P15419		1.10225		NUDIX/mutT hydrolase family protein [AT2G04440.1]	NP453612	AT2G04440.1
A_84_P118982		-1.28576		auxin-responsive protein-related [AT2G04850.1]	TC286505	AT2G04850.1
A_84_P808696		-1.07755		LHCB2.2 (Photosystem II light harvesting complex gene 2.2); chlorophyll binding [AT2G05070.1]	TC306821	AT2G05070.1
A_84_P288490		-1.14223		LHCB2.2 (Photosystem II light harvesting complex gene 2.2); chlorophyll binding [AT2G05070.1]	TC309781	AT2G05070.1
A_84_P803298		-1.03765		LHCB2.2 (Photosystem II light harvesting complex gene 2.2); chlorophyll binding [AT2G05070.1]		AT2G05070.1
A_84_P240805		-1.18622		LHCB2.1 (Photosystem II light harvesting complex gene 2.1); chlorophyll binding [AT2G05100.1]	TC306821	AT2G05100.1
A_84_P88889		-1.11903		pseudogene, glycine-rich protein [AT2G05580.1]	TC312064	AT2G05580.1
A_84_P756318		1.00575		transposable element gene [AT2G07693.1]		AT2G07693.1
A_84_P23614		1.57705		unknown protein [AT2G07738.1]	TC310946	AT2G07738.1
A_84_P561436		1.19641		Identical to Uncharacterized mitochondrial protein AtMg01110 [Arabidopsis Thaliana] (GB:P92543;GB:Q1ZXX1); similar to hypothetical protein BrnapMp064 [Brassica napus] (GB:YP_717161.1); contains InterPro domain RNA-dependent RNA polymerase, mitoviral (InterPro:IPR008686) [AT2G07749.1]		AT2G07749.1
A_84_P756441			1.19928	transposable element gene [AT2G07769.1]		AT2G07769.1
A_84_P583713		1.36282		unknown protein [AT2G07775.1]		AT2G07775.1
A_84_P720542		1.23035		pseudogene, similar to Ccl1, blastp match of 86% identity and 6.4e-177 P-value to GP [AT2G07783.1]		AT2G07783.1
A_84_P796826		1.612		unknown protein [AT2G07787.1]		AT2G07787.1
A_84_P597072		1.0271		unknown protein [AT2G07787.1]		AT2G07787.1
A_84_P758251		1.31651		unknown protein [AT2G07820.1]		AT2G07820.1
A_84_P837209			1.54201	similar to unknown protein [Arabidopsis thaliana] (TAIR:AT5G04860.1); similar to expressed protein [Oryza sativa (japonica cultivar-group)] (GB:ABF97907.1); similar to hypothetical protein OsJ_011438 [Oryza sativa (japonica cultivar-group)] (GB:EAZ27955.1); similar to Os03g0649000 [Oryza sativa (japonica cultivar-group)] (GB:NP_001050782.1) [AT2G10560.1]	TC292306	AT2G10560.1
A_84_P758615			1.47783	unknown pseudogene [AT2G10589.1]	TC292306	AT2G10589.1
A_84_P83479		-2.63935		protease inhibitor/seed storage/lipid transfer protein (LTP) family protein [AT2G10940.1]	TC297970	AT2G10940.1
A_84_P854454		-2.68914		protease inhibitor/seed storage/lipid transfer protein (LTP) family protein [AT2G10940.1]	TC309140	AT2G10940.1
A_84_P756691		1.54756		pseudogene, hypothetical protein [AT2G11280.1]		AT2G11280.1
A_84_P822795		-1.39266		similar to unknown protein [Arabidopsis thaliana] (TAIR:AT2G25270.1); similar to hypothetical protein OsJ_008445 [Oryza sativa (japonica cultivar-group)] (GB:EAZ24962.1) [AT2G12400.1]	TC310475	AT2G12400.1
A_84_P555238	-1.08844	-1.40156		similar to unknown protein [Arabidopsis thaliana] (TAIR:AT2G25270.1); similar to hypothetical protein OsJ_008445 [Oryza sativa (japonica cultivar-group)] (GB:EAZ24962.1) [AT2G12400.1]		AT2G12400.1
A_84_P809992		-1.00032		AGT (ALANINE:GLYOXYLATE AMINOTRANSFERASE) [AT2G13360.1]	TC299418	AT2G13360.1
A_84_P855812		-1.02105		AGT (ALANINE:GLYOXYLATE AMINOTRANSFERASE) [AT2G13360.1]	TC310055	AT2G13360.1
A_84_P788594		1.85253	2.23912	pseudogene of unknown protein [AT2G13410.1]	NP663141	AT2G13410.1
A_84_P757637	1.90593	1.83729		Encodes a ECA1 gametogenesis related family protein [AT2G14378.1]	NP1421681	AT2G14378.1
A_84_P19160		1.62441		ATPRB1 (Arabidopsis thaliana basic pathogenesis-related protein 1) [AT2G14580.1]	TC300499	AT2G14580.1
A_84_P755889		2.8432		transposable element gene [AT2G14970.1]		AT2G14970.1
A_84_P305070		-2.37945		similar to unknown protein [Arabidopsis thaliana] (TAIR:AT5G64190.1); similar to hypothetical protein [Vitis vinifera] (GB:CAN67723.1) [AT2G15020.1]	TC284320	AT2G15020.1
A_84_P13541		1.22231		disease resistance family protein [AT2G15080.1]	TC280696	AT2G15080.1
A_84_P203538	-1.48041			fatty acid elongase, putative [AT2G15090.1]	TC285641	AT2G15090.1
A_84_P166983		1.53074		glycine-rich protein [AT2G15340.1]	TC298792	AT2G15340.1
A_84_P22914		1.47174		UGT73B4; UDP-glycosyltransferase/ transferase, transferring glycosyl groups [AT2G15490.1]	TC286092	AT2G15490.1
A_84_P816791		-1.08859		zinc finger (C3HC4-type RING finger) family protein [AT2G15580.1]	TC297084	AT2G15580.1
A_84_P51740		1.62035		calmodulin-binding protein [AT2G15760.1]	TC287228	AT2G15760.1
A_84_P13454		1.95348		glycine-rich protein [AT2G15780.1]	TC293048	AT2G15780.1
A_84_P16290		-1.12713		COR413-PM1 (cold regulated 413 plasma membrane 1) [AT2G15970.1]	TC307506	AT2G15970.1
A_84_P757222		-2.9071		Encodes a defensin-like (DEFL) family protein. [AT2G16367.1]		AT2G16367.1
A_84_P21729		1.15417		similar to translocon-associated protein alpha (TRAP alpha) family protein [Arabidopsis thaliana] (TAIR:AT2G21160.1); similar to hypothetical protein [Vitis vinifera] (GB:CAN77171.1); contains domain PTHR12924 (PTHR12924) [AT2G16595.1]	TC293327	AT2G16595.1
A_84_P755447		-1.53082		a pseudogene whose sequence is similar to plasma membrane intrinsic protein 3 (PIP3) [AT2G16830.1]		AT2G16830.1
A_84_P529548		-1.37558		UDP-glucoronosyl/UDP-glucosyl transferase family protein [AT2G16890.2]	TC305194	AT2G16890.2
A_84_P801733		-1.60285		pseudogene, similar to unnamed protein product, blastp match of 40% identity and 5.7e-21 P-value to GP [AT2G16895.1]	TC302986	AT2G16895.1
A_84_P14408		-1.9373		tetracycline transporter [AT2G16990.1]	TC306456	AT2G16990.1
A_84_P855563		-2.32707		similar to unknown protein [Arabidopsis thaliana] (TAIR:AT2G16980.2); similar to unnamed protein product [Vitis vinifera] (GB:CAO61976.1); contains InterPro domain Major facilitator superfamily MFS-1 (InterPro:IPR011701); contains InterPro domain MFS general substrate transporter (InterPro:IPR016196) [AT2G16990.2]	TC309894	AT2G16990.2
A_84_P13202	-1.38318	-1.48717		ANAC036 (Arabidopsis NAC domain containing protein 36); transcription factor [AT2G17040.1]	TC292383	AT2G17040.1
A_84_P505607		1.86924		disease resistance protein-related [AT2G17055.1]		AT2G17055.1
A_84_P526889		-1.68803		similar to unknown protein [Arabidopsis thaliana] (TAIR:AT4G35320.1) [AT2G17300.1]	TC298357	AT2G17300.1
A_84_P220868		4.18406	3.63385	DC1 domain-containing protein [AT2G17740.1]	TC290555	AT2G17740.1
A_84_P820158		-1.12806		HIS1-3 (HISTONE H1-3); DNA binding [AT2G18050.1]	TC293473	AT2G18050.1
A_84_P15441		-1.20374		HIS1-3 (HISTONE H1-3); DNA binding [AT2G18050.1]	TC293473	AT2G18050.1
A_84_P855665	1.6974			similar to unknown protein [Arabidopsis thaliana] (TAIR:AT2G18210.1) [AT2G18200.1]	TC309954	AT2G18200.1
A_84_P549947	1.81048			similar to unknown protein [Arabidopsis thaliana] (TAIR:AT4G36500.1); similar to hypothetical protein [Thellungiella halophila] (GB:ABB45855.1) [AT2G18210.1]	TC299168	AT2G18210.1
A_84_P847323	1.78849			similar to unknown protein [Arabidopsis thaliana] (TAIR:AT4G36500.1); similar to hypothetical protein [Thellungiella halophila] (GB:ABB45855.1) [AT2G18210.1]	TC299168	AT2G18210.1
A_84_P849804	1.99538			similar to unknown protein [Arabidopsis thaliana] (TAIR:AT4G36500.1); similar to hypothetical protein [Thellungiella halophila] (GB:ABB45855.1) [AT2G18210.1]	TC303831	AT2G18210.1
A_84_P838155		1.03082		Identical to Nucleolar complex protein 2 homolog [Arabidopsis Thaliana] (GB:Q9ZPV5); similar to unknown protein [Arabidopsis thaliana] (TAIR:AT3G55510.1); similar to hypothetical protein [Vitis vinifera] (GB:CAN81729.1); contains InterPro domain Protein of unknown function UPF0120 (InterPro:IPR005343) [AT2G18220.1]	TC301601	AT2G18220.1
A_84_P13476		-1.33453		ATPPA2 (ARABIDOPSIS THALIANA PYROPHOSPHORYLASE 2); inorganic diphosphatase/ pyrophosphatase [AT2G18230.1]	TC311275	AT2G18230.1
A_84_P79415		-1.91282		basic helix-loop-helix (bHLH) family protein [AT2G18300.1]	TC290061	AT2G18300.1
A_84_P14446		2.19764	2.67152	FRK1 (FLG22-INDUCED RECEPTOR-LIKE KINASE 1); kinase [AT2G19190.1]	TC280994	AT2G19190.1
A_84_P237633		1.06333		ASHR2 (ASH1-RELATED PROTEIN 2) [AT2G19640.1]	TC289544	AT2G19640.1
A_84_P797000		-1.06253		leucine-rich repeat family protein / extensin family protein [AT2G19780.1]	TC287527	AT2G19780.1
A_84_P17227	1.09635			ATNADP-ME1 (NADP-MALIC ENZYME 1); malate dehydrogenase (oxaloacetate-decarboxylating) (NADP+)/ malic enzyme/ oxidoreductase, acting on NADH or NADPH, NAD or NADP as acceptor [AT2G19900.1]	TC283051	AT2G19900.1
A_84_P606882	-2.70918	-3.44128		similar to unknown protein [Arabidopsis thaliana] (TAIR:AT4G23390.1); similar to unnamed protein product [Vitis vinifera] (GB:CAO22094.1); similar to hypothetical protein [Vitis vinifera] (GB:CAN72570.1); contains InterPro domain Protein of unknown function DUF239, plant (InterPro:IPR004314) [AT2G20170.1]	NP454790	AT2G20170.1
A_84_P20092		-1.95648		kinase [AT2G20470.1]	NP453286	AT2G20470.1
A_84_P757998	1.17881	1.33513		similar to unknown protein [Arabidopsis thaliana] (TAIR:AT2G31090.1); similar to unnamed protein product [Vitis vinifera] (GB:CAO39329.1) [AT2G20562.1]		AT2G20562.1
A_84_P517162		-1.2408		protein phosphatase 2C, putative / PP2C, putative [AT2G20630.2]	NP965755	AT2G20630.2
A_84_P755255		-1.35172		pseudogene, MAP protein kinase, blastp match of 58% identity and 2.3e-83 P-value to GP [AT2G20640.1]		AT2G20640.1
A_84_P132645	1.49977	1.67762		similar to unknown protein [Arabidopsis thaliana] (TAIR:AT4G32480.1); similar to unnamed protein product [Vitis vinifera] (GB:CAO69754.1); contains InterPro domain Protein of unknown function DUF506, plant (InterPro:IPR006502) [AT2G20670.1]	TC291529	AT2G20670.1
A_84_P10627		-1.45838		AP2 domain-containing transcription factor, putative [AT2G20880.1]	TC289180	AT2G20880.1
A_84_P12567		2.56759		pseudogene, major intrinsic protein (MIP) family, contains Pfam profile: MIP PF00230; blastp match of 61% identity and 1.8e-40 P-value to PIR [AT2G21020.1]	TC292836	AT2G21020.1
A_84_P23915			1.20905	ATGRP2B (GLYCINE-RICH PROTEIN 2B); nucleic acid binding [AT2G21060.1]	TC296012	AT2G21060.1
A_84_P20132		-2.33282		auxin-responsive protein, putative [AT2G21210.1]	TC297890	AT2G21210.1
A_84_P19216		-1.1573		fructose-bisphosphate aldolase, putative [AT2G21330.1]	TC309354	AT2G21330.1
A_84_P286880		-1.08158		enhanced disease susceptibility protein, putative / salicylic acid induction deficient protein, putative [AT2G21340.1]	TC304749	AT2G21340.1
A_84_P826179		-1.31396		forkhead-associated domain-containing protein / FHA domain-containing protein [AT2G21530.1]	NP453775	AT2G21530.1
A_84_P233069		-1.27847		forkhead-associated domain-containing protein / FHA domain-containing protein [AT2G21530.1]	TC295553	AT2G21530.1
A_84_P13523		1.36657		R1/RNR1 (RIBONUCLEOTIDE REDUCTASE 1); ribonucleoside-diphosphate reductase [AT2G21790.1]	TC280996	AT2G21790.1
A_84_P234169		1.37867	1.35176	protein binding / zinc ion binding [AT2G21840.1]	TC305967	AT2G21840.1
A_84_P22981		-1.37103		AtRABG2/AtRab7A (Arabidopsis Rab GTPase homolog G2); GTP binding [AT2G21880.1]	TC290799	AT2G21880.1
A_84_P96316		-1.08844		similar to unknown protein [Arabidopsis thaliana] (TAIR:AT1G56180.1); similar to unnamed protein product [Vitis vinifera] (GB:CAO71767.1) [AT2G21960.1]	TC293190	AT2G21960.1
A_84_P853454		-1.14391		similar to unknown protein [Arabidopsis thaliana] (TAIR:AT1G56180.1); similar to unnamed protein product [Vitis vinifera] (GB:CAO71767.1) [AT2G21960.1]	TC308408	AT2G21960.1
A_84_P545535		-1.18428		similar to unknown protein [Arabidopsis thaliana] (TAIR:AT4G39610.1); similar to unnamed protein product [Vitis vinifera] (GB:CAO71771.1); contains InterPro domain Protein of unknown function DUF617, plant (InterPro:IPR006460) [AT2G21990.1]	TC293251	AT2G21990.1
A_84_P21995		1.10705		RNA recognition motif (RRM)-containing protein [AT2G22100.1]	TC286375	AT2G22100.1
A_84_P22916		-1.12147		trehalose-phosphatase [AT2G22190.1]	TC292536	AT2G22190.1
A_84_P12513		-1.74348		inositol-3-phosphate synthase isozyme 2 / myo-inositol-1-phosphate synthase 2 / MI-1-P synthase 2 / IPS 2 [AT2G22240.1]	TC309043	AT2G22240.1
A_84_P586414		2.51822		unknown protein [AT2G22320.1]	NP453142	AT2G22320.1
A_84_P18238		-1.02526		peroxidase 17 (PER17) (P17) [AT2G22420.1]	TC288849	AT2G22420.1
A_84_P22932	1.70678	1.65987	1.5991	NAI1; DNA binding / transcription factor [AT2G22770.1]	TC291571	AT2G22770.1
A_84_P611334		1.15497		VQ motif-containing protein [AT2G22880.1]	TC301095	AT2G22880.1
A_84_P598005		1.32992		small conjugating protein ligase [AT2G22890.1]	TC292154	AT2G22890.1
A_84_P13519		1.55502		similar to unknown protein [Arabidopsis thaliana] (TAIR:AT2G23120.1); similar to seed maturation protein PM35 [Glycine max] (GB:AAD51623.1) [AT2G23110.1]	TC300322	AT2G23110.1
A_84_P837280		1.06597		hydrolase, alpha/beta fold family protein [AT2G23560.1]	TC314090	AT2G23560.1
A_84_P11643	-1.31038			hydrolase, alpha/beta fold family protein [AT2G23590.1]	NP456675	AT2G23590.1
A_84_P13569		1.70264		protein kinase family protein / peptidoglycan-binding LysM domain-containing protein [AT2G23770.1]	TC311139	AT2G23770.1
A_84_P755691		1.50117		pseudogene, similar to VAP27, blastp match of 56% identity and 1.3e-25 P-value to GP [AT2G23860.1]	NP455687	AT2G23860.1
A_84_P808823			-1.09467	ALDH11A3 (Aldehyde dehydrogenase 11A3); 3-chloroallyl aldehyde dehydrogenase/ glyceraldehyde-3-phosphate dehydrogenase (NADP+) [AT2G24270.1]	TC302229	AT2G24270.1
A_84_P861214			-1.06518	ALDH11A3 (Aldehyde dehydrogenase 11A3); 3-chloroallyl aldehyde dehydrogenase/ glyceraldehyde-3-phosphate dehydrogenase (NADP+) [AT2G24270.1]	TC313268	AT2G24270.1
A_84_P606010	-2.06836			similar to unknown protein [Arabidopsis thaliana] (TAIR:AT4G31020.2); similar to unknown protein [Arabidopsis thaliana] (TAIR:AT4G31020.1); similar to unnamed protein product [Vitis vinifera] (GB:CAO22751.1); contains domain PTHR12277:SF8 (PTHR12277:SF8); contains domain PTHR12277 (PTHR12277); contains domain SSF53474 (SSF53474); contains domain G3DSA:3.40.50.1820 (G3DSA:3.40.50.1820) [AT2G24320.…	NP454219	AT2G24320.1
A_84_P832744			1.45499	RNA recognition motif (RRM)-containing protein [AT2G24350.1]	NP454226	AT2G24350.1
A_84_P272230		-1.81308		AFR (ATTENUATED FAR-RED RESPONSE) [AT2G24540.1]	TC287622	AT2G24540.1
A_84_P812850		1.62134	1.45842	WRKY17 (WRKY DNA-binding protein 17); transcription factor [AT2G24570.1]	TC312686	AT2G24570.1
A_84_P13537		1.54718	1.4327	WRKY17 (WRKY DNA-binding protein 17); transcription factor [AT2G24570.1]	TC312686	AT2G24570.1
A_84_P12592			1.28357	sarcosine oxidase family protein [AT2G24580.1]	TC300428	AT2G24580.1
A_84_P756849		-1.81152		60S ribosomal protein L4/L1 (RPL4C), pseudogene, blastp match of 68% identity and 7.9e-28 P-value to SP [AT2G24730.1]		AT2G24730.1
A_84_P592665			-1.66634	ATGDU4 (ARABIDOPSIS THALIANA GLUTAMINE DUMPER 4) [AT2G24762.1]		AT2G24762.1
A_84_P199154		1.06728		60S ribosomal protein L39 (RPL39A) [AT2G25210.1]	TC312600	AT2G25210.1
A_84_P502971		-1.19257		octicosapeptide/Phox/Bem1p (PB1) domain-containing protein / tetratricopeptide repeat (TPR)-containing protein [AT2G25290.1]	TC285317	AT2G25290.1
A_84_P757627	-1.47319	-1.20436		transcription factor [AT2G25312.1]		AT2G25312.1
A_84_P16401		2.09013		leucine-rich repeat family protein [AT2G25440.1]	NP454270	AT2G25440.1
A_84_P539348	1.12272	1.30379		unknown protein [AT2G25735.1]	TC308099	AT2G25735.1
A_84_P558814			1.76977	similar to unknown protein [Arabidopsis thaliana] (TAIR:AT1G79770.1); similar to unnamed protein product [Vitis vinifera] (GB:CAO45838.1); contains InterPro domain Protein of unknown function DUF1677, plant (InterPro:IPR012876) [AT2G25780.1]	NP455504	AT2G25780.1
A_84_P11557	-1.53395	-2.01948		transcription factor [AT2G25820.1]	TC294238	AT2G25820.1
A_84_P14393	-1.31718			ATAUR2 (ATAURORA2); histone serine kinase(H3-S10 specific) / kinase [AT2G25880.1]	TC292002	AT2G25880.1
A_84_P21049		1.03196		PLP2 (PHOSPHOLIPASE A 2A); nutrient reservoir [AT2G26560.1]	TC285860	AT2G26560.1
A_84_P820040		1.12662		PLP2 (PHOSPHOLIPASE A 2A); nutrient reservoir [AT2G26560.1]	TC312229	AT2G26560.1
A_84_P584647		1.58796		similar to transducin family protein / WD-40 repeat family protein [Arabidopsis thaliana] (TAIR:AT3G33530.1); similar to hypothetical protein OsJ_005152 [Oryza sativa (japonica cultivar-group)] (GB:EAZ21669.1); similar to unnamed protein product [Vitis vinifera] (GB:CAO65690.1); similar to hypothetical protein OsI_005626 [Oryza sativa (indica cultivar-group)] (GB:EAY84393.1); contains InterPro do…		AT2G26610.1
A_84_P591780		-1.53259		binding [AT2G26695.1]	TC298533	AT2G26695.1
A_84_P18220		2.53463		POL2B/TIL2 (TILTED2); DNA-directed DNA polymerase [AT2G27120.1]	NP455312	AT2G27120.1
A_84_P758014	-1.48788			AAO3 (ABSCISIC ALDEHYDE OXIDASE 3) [AT2G27150.2]		AT2G27150.2
A_84_P541993		1.10272		F-box family protein [AT2G27310.1]	TC289997	AT2G27310.1
A_84_P569474			-1.57833	similar to unknown protein [Arabidopsis thaliana] (TAIR:AT5G22430.1); similar to hypothetical protein [Vitis vinifera] (GB:CAN68427.1) [AT2G27385.1]	TC294365	AT2G27385.1
A_84_P805001			-1.75976	similar to unknown protein [Arabidopsis thaliana] (TAIR:AT5G22430.1); similar to hypothetical protein [Vitis vinifera] (GB:CAN68427.1) [AT2G27385.1]	TC298275	AT2G27385.1
A_84_P756150		1.7884		proline-rich family protein [AT2G27390.1]	TC308269	AT2G27390.1
A_84_P757317		1.28263		TAS1A; other RNA [AT2G27400.1]		AT2G27400.1
A_84_P602463		1.20182		binding [AT2G27430.1]	TC286714	AT2G27430.1
A_84_P503876		2.97721	2.52623	DC1 domain-containing protein [AT2G27660.1]		AT2G27660.1
A_84_P20120		1.53317		CYP94C1 (cytochrome P450, family 94, subfamily C, polypeptide 1); oxygen binding [AT2G27690.1]	TC285114	AT2G27690.1
A_84_P240205		1.00506		HDT4 (histone deacetylase 13) [AT2G27840.1]	TC295504	AT2G27840.1
A_84_P81579		1.4014		FRA8 (FRAGILE FIBER8); transferase [AT2G28110.1]	TC286424	AT2G28110.1
A_84_P788311		1.3797		FRA8 (FRAGILE FIBER8); transferase [AT2G28110.1]	TC286424	AT2G28110.1
A_84_P573065	2.83148			carbonic anhydrase family protein [AT2G28210.1]	NP454661	AT2G28210.1
A_84_P255150			-1.90515	similar to unknown protein [Arabidopsis thaliana] (TAIR:AT5G60650.1) [AT2G28410.1]	TC294408	AT2G28410.1
A_84_P10670		-1.17116		RAP2.7/TOE1 (TARGET OF EAT1 1); DNA binding / transcription factor [AT2G28550.1]	TC306667	AT2G28550.1
A_84_P757473	-1.18385			ATRAD51B/RAD51B [AT2G28560.2]	NP1395580	AT2G28560.2
A_84_P12522		2.66545		zinc finger (C2H2 type) family protein [AT2G28710.1]	NP453090	AT2G28710.1
A_84_P172261		1.82664	1.3533	PLL4 (POLTERGEIST LIKE 4); protein serine/threonine phosphatase [AT2G28890.1]	TC304901	AT2G28890.1
A_84_P13563		1.80783		APK1B (Arabidopsis protein kinase 1B); kinase [AT2G28930.1]	TC287553	AT2G28930.1
A_84_P789454		1.81375	1.63098	APK1B (Arabidopsis protein kinase 1B); kinase [AT2G28930.3]	TC287553	AT2G28930.3
A_84_P851110		1.6936		APK1B (Arabidopsis protein kinase 1B); kinase [AT2G28930.3]	TC305961	AT2G28930.3
A_84_P20183		1.07397		scarecrow transcription factor family protein [AT2G29060.1]	TC291814	AT2G29060.1
A_84_P16334		-2.10761		tropinone reductase, putative / tropine dehydrogenase, putative [AT2G29290.1]	TC292852	AT2G29290.1
A_84_P756013		1.47478		pseudogene, similar to LD32459p, contains Pfam profile PF04502: Family of unknown function (DUF572); blastp match of 50% identity and 4.6e-16 P-value to GP [AT2G29430.1]	NP456064	AT2G29430.1
A_84_P22907	-1.09939	-1.18409		thiamine biosynthesis family protein / thiC family protein [AT2G29630.1]	TC308079	AT2G29630.1
A_84_P819117		-1.19606		thiamine biosynthesis family protein / thiC family protein [AT2G29630.1]	TC309555	AT2G29630.1
A_84_P515410		1.04525		similar to unknown protein [Arabidopsis thaliana] (TAIR:AT1G07175.1) [AT2G29995.1]	TC299143	AT2G29995.1
A_84_P251865		-1.03643		catalytic [AT2G30170.1]	TC290998	AT2G30170.1
A_84_P785326		-1.02981		catalytic [AT2G30170.2]	TC290998	AT2G30170.2
A_84_P13438		1.10192	1.10919	ATC4H/C4H/CYP73A5 (CINNAMATE 4-HYDROXYLASE, CINNAMATE-4-HYDROXYLASE); trans-cinnamate 4-monooxygenase [AT2G30490.1]	TC309809	AT2G30490.1
A_84_P12547		2.0329		CYP71A12 (CYTOCHROME P450, FAMILY 71, SUBFAMILY A, POLYPEPTIDE 12); oxygen binding [AT2G30750.1]	TC284119	AT2G30750.1
A_84_P758588			-1.81502	unknown protein [AT2G30766.1]	TC305259	AT2G30766.1
A_84_P17274		-1.17521		PSBP-2 (photosystem II subunit P-2); calcium ion binding [AT2G30790.1]	NP457006	AT2G30790.1
A_84_P18256		1.62558		2-oxoglutarate-dependent dioxygenase, putative [AT2G30840.1]	TC289263	AT2G30840.1
A_84_P23931		1.24179		oxysterol-binding family protein [AT2G31020.1]	TC311909	AT2G31020.1
A_84_P231679		-1.25533		ATP synthase protein I -related [AT2G31040.1]	TC304683	AT2G31040.1
A_84_P598030		1.17387		ATCDT1A/CDT1/CDT1A (ARABIDOPSIS HOMOLOG OF YEAST CDT1 A); cyclin-dependent protein kinase/ protein binding [AT2G31270.1]	TC283376	AT2G31270.1
A_84_P757951		3.73629	4.58648	similar to unknown protein [Arabidopsis thaliana] (TAIR:AT1G06137.1) [AT2G31335.1]	TC290353	AT2G31335.1
A_84_P546454		-1.53435		ethylene-responsive protein, putative [AT2G31730.1]	TC303303	AT2G31730.1
A_84_P826867		-1.40679		ethylene-responsive protein, putative [AT2G31730.1]	TC303605	AT2G31730.1
A_84_P857143		-1.42319		ethylene-responsive protein, putative [AT2G31730.1]	TC310870	AT2G31730.1
A_84_P839424		-1.36434		endonuclease/exonuclease/phosphatase family protein [AT2G32010.1]	NP1339063	AT2G32010.1
A_84_P811686		1.09662		40S ribosomal protein S12 (RPS12C) [AT2G32060.3]	TC302494	AT2G32060.3
A_84_P12616		1.20709		60S ribosomal protein L27 (RPL27A) [AT2G32220.1]	TC312525	AT2G32220.1
A_84_P17269	1.27538	1.51926		UCC1 (UCLACYANIN 1); copper ion binding [AT2G32300.1]	TC292893	AT2G32300.1
A_84_P16324		1.46996		GLR5 (Glutamate receptor 5) [AT2G32400.1]	TC280864	AT2G32400.1
A_84_P201138		2.45384		F-box family protein-related [AT2G32470.1]		AT2G32470.1
A_84_P19214		-1.61127		MAPKKK17 (Mitogen-activated protein kinase kinase kinase 17); kinase [AT2G32510.1]	NP455916	AT2G32510.1
A_84_P518964		-1.36251		similar to Os08g0422000 [Oryza sativa (japonica cultivar-group)] (GB:NP_001061825.1); similar to unnamed protein product [Vitis vinifera] (GB:CAO24043.1); similar to CM0545.530.nc [Lotus japonicus] (GB:BAF98233.1); contains domain G3DSA:3.50.50.60 (G3DSA:3.50.50.60); contains domain SSF51905 (SSF51905) [AT2G32640.1]	TC307478	AT2G32640.1
A_84_P12550	2.25749	3.5301	2.65748	disease resistance family protein / LRR family protein [AT2G32660.1]	TC281474	AT2G32660.1
A_84_P22006		1.9413		ATVAMP725 (Arabidopsis thaliana vesicle-associated membrane protein 725) [AT2G32670.1]	TC291474	AT2G32670.1
A_84_P19168		1.03435		B5 #4 (cytochrome b5 family protein #4); heme binding / transition metal ion binding [AT2G32720.1]	TC308434	AT2G32720.1
A_84_P23890			1.10954	tyrosine specific protein phosphatase family protein [AT2G32960.1]	TC304470	AT2G32960.1
A_84_P22923	1.48357			leucine-rich repeat family protein [AT2G33020.1]	TC281031	AT2G33020.1
A_84_P143149	-1.39155			33 kDa secretory protein-related [AT2G33330.1]	TC287095	AT2G33330.1
A_84_P180484		-1.47511		similar to unknown protein [Arabidopsis thaliana] (TAIR:AT5G44670.1); similar to unnamed protein product [Vitis vinifera] (GB:CAO66312.1); similar to hypothetical protein [Vitis vinifera] (GB:CAN76802.1); contains InterPro domain Protein of unknown function DUF23 (InterPro:IPR008166) [AT2G33570.1]	TC282928	AT2G33570.1
A_84_P73494	-1.00507			MEE18 (maternal effect embryo arrest 18) [AT2G34090.2]	TC307196	AT2G34090.2
A_84_P149348	-1.06922			similar to unknown protein [Arabidopsis thaliana] (TAIR:AT1G29240.1); similar to unnamed protein product [Vitis vinifera] (GB:CAO48048.1); contains InterPro domain Protein of unknown function DUF688 (InterPro:IPR007789) [AT2G34170.1]	TC284411	AT2G34170.1
A_84_P14490		3.69226		CIPK13 (SNF1-RELATED PROTEIN KINASE 3.7); kinase [AT2G34180.1]	TC284975	AT2G34180.1
A_84_P565621	-1.40313	-1.27223		pseudogene of unknown protein [AT2G34240.1]	TC296224	AT2G34240.1
A_84_P207958		-1.01396		LHB1B2 (Photosystem II light harvesting complex gene 1.5); chlorophyll binding [AT2G34420.1]	TC301637	AT2G34420.1
A_84_P807070		-1.3836		LHB1B2 (Photosystem II light harvesting complex gene 1.5); chlorophyll binding [AT2G34420.1]	TC312540	AT2G34420.1
A_84_P862752		-1.00122		LHB1B2 (Photosystem II light harvesting complex gene 1.5); chlorophyll binding [AT2G34420.1]	TC314055	AT2G34420.1
A_84_P17286		-2.48633		MEE25 (maternal effect embryo arrest 25); catalytic [AT2G34850.1]	TC294032	AT2G34850.1
A_84_P53500		3.08082		transcriptional factor B3 family protein [AT2G35310.1]	NP455990	AT2G35310.1
A_84_P23855		-1.29602		GDCH (Glycine decarboxylase complex H) [AT2G35370.1]	TC292626	AT2G35370.1
A_84_P281110		1.22273		heavy-metal-associated domain-containing protein [AT2G35730.1]	TC300388	AT2G35730.1
A_84_P54670		-2.08729		integral membrane family protein [AT2G35760.1]	TC301509	AT2G35760.1
A_84_P786781		-2.13275		integral membrane family protein [AT2G35760.1]	TC301509	AT2G35760.1
A_84_P510106		1.72104		similar to unknown protein [Arabidopsis thaliana] (TAIR:AT3G52360.1); similar to unnamed protein product [Vitis vinifera] (GB:CAO39911.1) [AT2G35850.1]	TC292997	AT2G35850.1
A_84_P18244		2.28441	2.04233	zinc finger (C3HC4-type RING finger) family protein [AT2G35910.1]	TC296973	AT2G35910.1
A_84_P89769		1.68052	1.58156	U-box domain-containing protein [AT2G35930.1]	TC287751	AT2G35930.1
A_84_P23919		1.09154		YLS9 (YELLOW-LEAF-SPECIFIC GENE 9) [AT2G35980.1]	TC291659	AT2G35980.1
A_84_P544696		-1.15812		3'-5' exonuclease domain-containing protein [AT2G36110.1]	TC293881	AT2G36110.1
A_84_P143889		-2.03823		similar to unnamed protein product [Vitis vinifera] (GB:CAO15876.1); similar to hypothetical protein [Vitis vinifera] (GB:CAN74693.1) [AT2G36145.1]	TC293798	AT2G36145.1
A_84_P834955	1.08264			ATPDR6/PDR6 (PLEIOTROPIC DRUG RESISTANCE 6); ATPase, coupled to transmembrane movement of substances [AT2G36380.1]	TC311998	AT2G36380.1
A_84_P586462		1.22322		similar to pre-mRNA cleavage complex-related [Arabidopsis thaliana] (TAIR:AT4G04885.1); similar to unnamed protein product [Vitis vinifera] (GB:CAO15965.1); contains InterPro domain ENTH/VHS (InterPro:IPR008942) [AT2G36485.1]	TC292345	AT2G36485.1
A_84_P561511	-1.0488			NLI interacting factor (NIF) family protein [AT2G36540.1]	NP453745	AT2G36540.1
A_84_P599827		1.0083		pyruvate kinase, putative [AT2G36580.1]	TC297442	AT2G36580.1
A_84_P18221		-2.64201		ATECP63 (EMBRYONIC CELL PROTEIN 63) [AT2G36640.1]	TC286496	AT2G36640.1
A_84_P13494		4.18563	5.88194	oxidoreductase, 2OG-Fe(II) oxygenase family protein [AT2G36690.1]	NP454352	AT2G36690.1
A_84_P19166	-2.72701			UGT72C1 (UDP-GLUCOSYL TRANSFERASE 72C1); UDP-glycosyltransferase/ transferase, transferring glycosyl groups [AT2G36750.1]	TC285207	AT2G36750.1
A_84_P13526		-1.33892		GAMMA-TIP (Tonoplast intrinsic protein (TIP) gamma); water channel [AT2G36830.1]	TC297546	AT2G36830.1
A_84_P807555		-1.77907		GAMMA-TIP (Tonoplast intrinsic protein (TIP) gamma); water channel [AT2G36830.1]	TC299869	AT2G36830.1
A_84_P807532		-1.26613		GAMMA-TIP (Tonoplast intrinsic protein (TIP) gamma); water channel [AT2G36830.1]	TC309787	AT2G36830.1
A_84_P807528		-1.32626		GAMMA-TIP (Tonoplast intrinsic protein (TIP) gamma); water channel [AT2G36830.1]	TC309852	AT2G36830.1
A_84_P14471	1.44606	1.62957	1.39385	heavy-metal-associated domain-containing protein [AT2G36950.1]	TC286519	AT2G36950.1
A_84_P809207	1.2859	1.42773	1.19262	PAL1 (PHE AMMONIA LYASE 1); phenylalanine ammonia-lyase [AT2G37040.1]	TC297643	AT2G37040.1
A_84_P12515	-1.0919			myosin heavy chain-related [AT2G37080.1]	TC283255	AT2G37080.1
A_84_P788108		-1.54639		Encodes a protein of unknown function. It has been crystallized and shown to be structurally almost identical to the protein encoded by At5g11950. [AT2G37210.1]	NP454400	AT2G37210.1
A_84_P531393	-2.13857	-1.73222		Encodes a protein of unknown function. It has been crystallized and shown to be structurally almost identical to the protein encoded by At5g11950. [AT2G37210.1]	TC295352	AT2G37210.1
A_84_P130216		2.07005		unknown protein [AT2G37750.1]	TC299518	AT2G37750.1
A_84_P302850		-2.33336		protease inhibitor/seed storage/lipid transfer protein (LTP) family protein [AT2G37870.1]	TC297604	AT2G37870.1
A_84_P576643		-1.18507		zinc finger (C3HC4-type RING finger) family protein [AT2G37950.1]	TC296125	AT2G37950.1
A_84_P18263		-1.05542		myb family transcription factor [AT2G38090.1]	TC297292	AT2G38090.1
A_84_P11645		-1.52089		CAX1 (CATION EXCHANGER 1); calcium ion transmembrane transporter/ calcium:hydrogen antiporter [AT2G38170.1]	TC283758	AT2G38170.1
A_84_P757039		-1.50962		CAX1 (CATION EXCHANGER 1); calcium:hydrogen antiporter [AT2G38170.2]	TC283758	AT2G38170.2
A_84_P837722		-1.37638		similar to unknown protein [Arabidopsis thaliana] (TAIR:AT2G27320.1); similar to hypothetical protein 25.t00048 [Brassica oleracea] (GB:ABD64955.1); contains InterPro domain Protein of unknown function DUF239, plant (InterPro:IPR004314) [AT2G38255.1]	TC296830	AT2G38255.1
A_84_P225529		-1.31922		integral membrane protein, putative [AT2G38480.1]	TC291400	AT2G38480.1
A_84_P809041	1.23355		1.09672	LTP2 (LIPID TRANSFER PROTEIN 2); lipid binding [AT2G38530.1]	TC311206	AT2G38530.1
A_84_P21047	1.30698		1.18663	LTP2 (LIPID TRANSFER PROTEIN 2); lipid binding [AT2G38530.1]	TC313098	AT2G38530.1
A_84_P568618		2.76394		similar to unknown protein [Arabidopsis thaliana] (TAIR:AT3G54520.1) [AT2G38823.1]	TC293035	AT2G38823.1
A_84_P194694		2.42197		YLS5 (yellow-leaf-specific gene 5) [AT2G38860.1]	TC286088	AT2G38860.1
A_84_P23913	1.93715	2.15455	2.22467	protease inhibitor, putative [AT2G38870.1]	TC296599	AT2G38870.1
A_84_P301370		-1.44665		similar to hypothetical protein [Vitis vinifera] (GB:CAN75604.1) [AT2G38890.1]	TC298613	AT2G38890.1
A_84_P793199	3.10147		3.28448	ATPT2 (PHOSPHATE TRANSPORTER 2); carbohydrate transmembrane transporter/ phosphate transmembrane transporter/ sugar:hydrogen ion symporter [AT2G38940.1]	TC284116	AT2G38940.1
A_84_P23912	2.38249		2.60256	ATPT2 (PHOSPHATE TRANSPORTER 2); carbohydrate transmembrane transporter/ phosphate transmembrane transporter/ sugar:hydrogen ion symporter [AT2G38940.1]	TC284116	AT2G38940.1
A_84_P14454			2.76621	peroxidase, putative [AT2G39040.1]	TC289601	AT2G39040.1
A_84_P597160		1.65024		similar to unknown protein [Arabidopsis thaliana] (TAIR:AT3G58520.1); similar to unnamed protein product [Vitis vinifera] (GB:CAO68916.1); contains InterPro domain Protein of unknown function DUF860, plant (InterPro:IPR008578) [AT2G39120.1]	TC299160	AT2G39120.1
A_84_P836887		1.78444	2.12807	MLO12 (MILDEW RESISTANCE LOCUS O 12); calmodulin binding [AT2G39200.1]	TC283383	AT2G39200.1
A_84_P20166		1.78423	2.11043	MLO12 (MILDEW RESISTANCE LOCUS O 12); calmodulin binding [AT2G39200.1]	TC283383	AT2G39200.1
A_84_P19220		1.8633	1.92806	nodulin family protein [AT2G39210.1]	TC282996	AT2G39210.1
A_84_P10711	1.11794			jacalin lectin family protein [AT2G39330.1]	TC284354	AT2G39330.1
A_84_P817628	1.15834			jacalin lectin family protein [AT2G39330.1]	TC312794	AT2G39330.1
A_84_P17328		1.73703		ABC transporter family protein [AT2G39350.1]	TC281670	AT2G39350.1
A_84_P267240		3.93532	4.33411	ATEXO70H2 (EXOCYST SUBUNIT EXO70 FAMILY PROTEIN H2); protein binding [AT2G39380.1]	TC290654	AT2G39380.1
A_84_P22060		1.37891		60S ribosomal protein L35 (RPL35B) [AT2G39390.1]	TC296708	AT2G39390.1
A_84_P171963		3.35715		hydrolase, alpha/beta fold family protein [AT2G39410.1]	NP456357	AT2G39410.1
A_84_P308593		-1.77796		PPL2 (PSBP-LIKE PROTEIN 2); calcium ion binding [AT2G39470.1]	TC291246	AT2G39470.1
A_84_P788076		-2.03464		PPL2 (PSBP-LIKE PROTEIN 2); calcium ion binding [AT2G39470.1]	TC314266	AT2G39470.1
A_84_P853457		-1.92809		PPL2 (PSBP-LIKE PROTEIN 2); calcium ion binding [AT2G39470.3]	TC308410	AT2G39470.3
A_84_P836767		-1.64859		PPL2 (PSBP-LIKE PROTEIN 2); calcium ion binding [AT2G39470.3]	TC312246	AT2G39470.3
A_84_P834270		1.57496		F-box family protein [AT2G39490.1]	NP456343	AT2G39490.1
A_84_P53100		1.41248		F-box family protein [AT2G39490.1]	TC288410	AT2G39490.1
A_84_P868076	1.62782	2.02594	1.9136	Identical to UPF0497 membrane protein At2g39518 [Arabidopsis Thaliana] (GB:Q56X75); similar to integral membrane protein, putative [Arabidopsis thaliana] (TAIR:AT2G39530.1); similar to hypothetical protein [Vitis vinifera] (GB:CAN64094.1); contains InterPro domain Conserved hypothetical protein CHP01569, trans-membrane plant (InterPro:IPR006459); contains InterPro domain Protein of unknown functi…	TC307202	AT2G39518.1
A_84_P757847	1.57297	1.99577	1.97912	Identical to UPF0497 membrane protein At2g39518 [Arabidopsis Thaliana] (GB:Q56X75); similar to integral membrane protein, putative [Arabidopsis thaliana] (TAIR:AT2G39530.1); similar to hypothetical protein [Vitis vinifera] (GB:CAN64094.1); contains InterPro domain Conserved hypothetical protein CHP01569, trans-membrane plant (InterPro:IPR006459); contains InterPro domain Protein of unknown functi…	TC307202	AT2G39518.1
A_84_P557103	2.23781	2.11076	2.64794	integral membrane protein, putative [AT2G39530.1]	TC297749	AT2G39530.1
A_84_P834687		-1.08314		subtilase [AT2G39850.1]	TC301209	AT2G39850.1
A_84_P10642		-1.24591		subtilase [AT2G39850.1]	TC309448	AT2G39850.1
A_84_P507460		1.62769		similar to unknown protein [Arabidopsis thaliana] (TAIR:AT5G47635.1); similar to hypothetical protein 31.t00008 [Brassica oleracea] (GB:ABD65108.1) [AT2G40113.1]	NP1422516	AT2G40113.1
A_84_P97886		-1.4834		heat shock protein-related [AT2G40130.1]	NP1098415	AT2G40130.1
A_84_P10637			2.11314	ATEM6/GEA6 (ARABIDOPSIS EARLY METHIONINE-LABELLED 6) [AT2G40170.1]	TC310663	AT2G40170.1
A_84_P524320		-1.13137		unknown protein [AT2G40475.1]	TC289335	AT2G40475.1
A_84_P196604		-1.37856		unknown protein [AT2G40530.1]	TC294064	AT2G40530.1
A_84_P11569		-3.58174		ATEXPA8 (ARABIDOPSIS THALIANA EXPANSIN A8) [AT2G40610.1]	TC306683	AT2G40610.1
A_84_P21088		-1.07868		ARR16 (response regulator 16); transcription regulator/ two-component response regulator [AT2G40670.1]	TC300059	AT2G40670.1
A_84_P17305		1.74135		WRKY55 (WRKY DNA-binding protein 55); transcription factor [AT2G40740.1]	NP1422031	AT2G40740.1
A_84_P547370		-1.09746		protein kinase family protein / protein phosphatase 2C ( PP2C) family protein [AT2G40860.1]	TC282234	AT2G40860.1
A_84_P16310		1.16039		CYP98A3 (CYTOCHROME P450, FAMILY 98, SUBFAMILY A, POLYPEPTIDE 3); monooxygenase/ p-coumarate 3-hydroxylase [AT2G40890.1]	TC289337	AT2G40890.1
A_84_P813707	1.14157	1.3356	1.09263	CYP98A3 (CYTOCHROME P450, FAMILY 98, SUBFAMILY A, POLYPEPTIDE 3); monooxygenase/ p-coumarate 3-hydroxylase [AT2G40890.1]	TC297026	AT2G40890.1
A_84_P846994		-1.03117		nodulin MtN21 family protein [AT2G40900.1]	NP456866	AT2G40900.1
A_84_P19147		-1.04635		myb family transcription factor [AT2G40970.1]	TC292099	AT2G40970.1
A_84_P124252		1.35439		ATCAMBP25 (ARABIDOPSIS THALIANA CALMODULIN (CAM)-BINDING PROTEIN OF 25 KDA); calmodulin binding [AT2G41010.1]	TC291327	AT2G41010.1
A_84_P173611		1.02485		F-box family protein [AT2G41170.1]	TC288938	AT2G41170.1
A_84_P108542		1.11839		sigA-binding protein-related [AT2G41180.1]	TC293513	AT2G41180.1
A_84_P21050		-1.15309		M10 [AT2G41280.1]	TC309397	AT2G41280.1
A_84_P758412		1.34817		similar to unknown [Picea sitchensis] (GB:ABK27016.1) [AT2G41342.1]		AT2G41342.1
A_84_P755266	-1.11594			N-acetyltransferase [AT2G41450.1]	NP965893	AT2G41450.1
A_84_P826049	-3.17267			similar to unknown protein [Arabidopsis thaliana] (TAIR:AT4G35170.1); similar to hypothetical protein [Vitis vinifera] (GB:CAN73167.1) [AT2G41990.1]	TC291440	AT2G41990.1
A_84_P231139		5.06483	4.78276	CHP-rich zinc finger protein, putative [AT2G42060.1]	TC292575	AT2G42060.1
A_84_P19111		-1.37204		ACT9 (ACTIN 9); structural constituent of cytoskeleton [AT2G42090.1]	NP452792	AT2G42090.1
A_84_P581112	-1.05803			DNA-binding bromodomain-containing protein [AT2G42150.1]	TC282776	AT2G42150.1
A_84_P55980		1.05589		basic helix-loop-helix (bHLH) family protein [AT2G42280.1]	NP456752	AT2G42280.1
A_84_P829746			1.40482	zinc finger (C3HC4-type RING finger) family protein [AT2G42360.1]	TC293174	AT2G42360.1
A_84_P13546		1.44425	1.46724	zinc finger (C3HC4-type RING finger) family protein [AT2G42360.1]	TC304413	AT2G42360.1
A_84_P257180		-1.88986		bZIP transcription factor family protein [AT2G42380.1]	TC291315	AT2G42380.1
A_84_P23852		-1.57199		COR15A (COLD-REGULATED 15A) [AT2G42540.1]	TC306641	AT2G42540.1
A_84_P21080	-2.31632	4.30201		PDF1 (PROTODERMAL FACTOR 1) [AT2G42840.1]	TC288780	AT2G42840.1
A_84_P805813	-2.96834	4.40144	-2.41233	PDF1 (PROTODERMAL FACTOR 1) [AT2G42840.1]	TC288780	AT2G42840.1
A_84_P859818		4.41088		PDF1 (PROTODERMAL FACTOR 1) [AT2G42840.1]	TC312410	AT2G42840.1
A_84_P164223	-1.99615			HLH1/PAR1 (PHY RAPIDLY REGULATED 1); transcription regulator [AT2G42870.1]	TC297375	AT2G42870.1
A_84_P22670	-1.42895			similar to unknown protein [Arabidopsis thaliana] (TAIR:AT2G30615.1); similar to F-box domain containing protein [Brassica oleracea] (GB:ABD65166.1) [AT2G42955.1]	TC307173	AT2G42955.1
A_84_P838362		1.64363		DNA binding / transcription factor [AT2G43140.1]	TC302189	AT2G43140.1
A_84_P150068		1.49409		DNA binding / transcription factor [AT2G43140.1]	TC302189	AT2G43140.1
A_84_P722142		1.39563		other RNA [AT2G43375.1]	TC294631	AT2G43375.1
A_84_P21958	1.43066	1.39266		ATTI1 (ARABIDOPSIS THALIANA TRYPSIN INHIBITOR PROTEIN 1) [AT2G43510.1]	TC310869	AT2G43510.1
A_84_P20061			1.31551	chitinase, putative [AT2G43580.1]	TC292701	AT2G43580.1
A_84_P16277	1.15265		2.45254	glycoside hydrolase family 19 protein [AT2G43610.1]	TC289908	AT2G43610.1
A_84_P15331			2.18847	chitinase, putative [AT2G43620.1]	TC310159	AT2G43620.1
A_84_P787961			1.32892	lectin-related [AT2G43730.1]	NP457184	AT2G43730.1
A_84_P23844		1.7212		polygalacturonase, putative / pectinase, putative [AT2G43870.1]	NP457172	AT2G43870.1
A_84_P830520		1.2973		similar to unknown protein [Arabidopsis thaliana] (TAIR:AT3G59880.1) [AT2G44010.1]	TC309960	AT2G44010.1
A_84_P512786		1.48946		similar to unknown protein [Arabidopsis thaliana] (TAIR:AT3G59880.1) [AT2G44010.1]		AT2G44010.1
A_84_P22035		2.32684		GTP binding / translation initiation factor [AT2G44070.1]	TC291046	AT2G44070.1
A_84_P77129		3.01737	3.62761	DC1 domain-containing protein [AT2G44370.1]	TC293345	AT2G44370.1
A_84_P824802		3.00101	3.5905	DC1 domain-containing protein [AT2G44370.1]	TC293345	AT2G44370.1
A_84_P832916		3.43607	3.36022	DC1 domain-containing protein [AT2G44380.1]	TC293491	AT2G44380.1
A_84_P139609		3.11397	3.28856	DC1 domain-containing protein [AT2G44380.1]		AT2G44380.1
A_84_P22019		3.35621	3.33646	DC1 domain-containing protein [AT2G44390.1]	NP456085	AT2G44390.1
A_84_P223829		1.23979		senescence-associated protein-related [AT2G44670.1]	TC293301	AT2G44670.1
A_84_P20176		3.16353		UCC2 (UCLACYANIN 2); copper ion binding [AT2G44790.1]	TC296562	AT2G44790.1
A_84_P17343		-1.46766		ATERF13/EREBP (ETHYLENE-RESPONSIVE ELEMENT BINDING FACTOR 13); DNA binding / transcription factor [AT2G44840.1]	TC293511	AT2G44840.1
A_84_P11627			1.26638	matrix metalloproteinase [AT2G45040.1]	TC287965	AT2G45040.1
A_84_P15361	2.56758	2.62824	2.56614	pectinesterase family protein [AT2G45220.1]	TC284686	AT2G45220.1
A_84_P176164		1.42766	1.03167	3-phosphoshikimate 1-carboxyvinyltransferase / 5-enolpyruvylshikimate-3-phosphate / EPSP synthase [AT2G45300.1]	TC308311	AT2G45300.1
A_84_P88159		3.39187	3.0758	similar to unknown protein [Arabidopsis thaliana] (TAIR:AT3G60780.1); similar to unnamed protein product [Vitis vinifera] (GB:CAO24498.1); contains InterPro domain Protein of unknown function DUF1442 (InterPro:IPR009902) [AT2G45360.1]	TC295369	AT2G45360.1
A_84_P16308		-1.25431		BEN1; oxidoreductase, acting on CH-OH group of donors [AT2G45400.1]	TC292814	AT2G45400.1
A_84_P22955	-1.07418			ATAUR3 (ATAURORA3); ATP binding / histone serine kinase(H3-S10 specific) / protein kinase [AT2G45490.1]	TC291756	AT2G45490.1
A_84_P561544		-1.10593		CYP76C1 (cytochrome P450, family 76, subfamily C, polypeptide 1); heme binding / iron ion binding / monooxygenase [AT2G45560.1]	TC283598	AT2G45560.1
A_84_P69244		-1.61774		CYP76C1 (cytochrome P450, family 76, subfamily C, polypeptide 1); heme binding / iron ion binding / monooxygenase [AT2G45560.2]	TC290112	AT2G45560.2
A_84_P120202	-1.20806			hydrolase [AT2G45600.1]	TC286256	AT2G45600.1
A_84_P581125	-2.05933			hydrolase [AT2G45610.1]	TC313051	AT2G45610.1
A_84_P846147		-1.00502		armadillo/beta-catenin repeat family protein [AT2G45720.1]	TC295467	AT2G45720.1
A_84_P15445		-1.10145		PIP1B (plasma membrane intrinsic protein 1;2); water channel [AT2G45960.1]	TC303638	AT2G45960.1
A_84_P808926		-1.12578		PIP1B (plasma membrane intrinsic protein 1;2); water channel [AT2G45960.1]	TC303638	AT2G45960.1
A_84_P801042		-1.1397		PIP1B (plasma membrane intrinsic protein 1;2); water channel [AT2G45960.1]	TC303956	AT2G45960.1
A_84_P808952		-1.20539		PIP1B (plasma membrane intrinsic protein 1;2); water channel [AT2G45960.1]	TC303956	AT2G45960.1
A_84_P12510		-1.00755		ATMPK12 (Arabidopsis thaliana MAP kinase 12); MAP kinase/ kinase [AT2G46070.1]	TC288460	AT2G46070.1
A_84_P542948		1.35575		similar to unknown protein [Arabidopsis thaliana] (TAIR:AT3G54200.1); similar to plant cell wall protein SlTFR88 [Lycopersicon esculentum] (GB:ABF39005.1); contains InterPro domain Harpin-induced 1 (InterPro:IPR010847) [AT2G46150.1]	TC294908	AT2G46150.1
A_84_P787949		1.32472		similar to unknown protein [Arabidopsis thaliana] (TAIR:AT3G54200.1); similar to plant cell wall protein SlTFR88 [Lycopersicon esculentum] (GB:ABF39005.1); contains InterPro domain Harpin-induced 1 (InterPro:IPR010847) [AT2G46150.1]	TC294908	AT2G46150.1
A_84_P17238	-1.07947			eukaryotic translation initiation factor 3 subunit 2, putative / eIF-3 beta, putative / eIF3i, putative [AT2G46290.1]	TC290305	AT2G46290.1
A_84_P23898		-1.57242		CYP78A6 (cytochrome P450, family 78, subfamily A, polypeptide 6); oxygen binding [AT2G46660.1]	TC284225	AT2G46660.1
A_84_P81599		1.45164		FAD-binding domain-containing protein [AT2G46750.1]	TC283473	AT2G46750.1
A_84_P807767		-1.41767		PSAP/PSI-P/PTAC8/TMP14 (THYLAKOID MEMBRANE PHOSPHOPROTEIN OF 14 KDA); DNA binding [AT2G46820.1]	TC300833	AT2G46820.1
A_84_P19241		-1.02714		CCA1 (CIRCADIAN CLOCK ASSOCIATED 1); transcription factor [AT2G46830.1]	TC284054	AT2G46830.1
A_84_P21132	-1.27171	-1.20967		CYP709B2 (cytochrome P450, family 709, subfamily B, polypeptide 2); oxygen binding [AT2G46950.1]	TC284534	AT2G46950.1
A_84_P521683		-1.52575		PIL1 (PHYTOCHROME INTERACTING FACTOR 3-LIKE 1); transcription factor [AT2G46970.1]	TC287421	AT2G46970.1
A_84_P17348		1.12868		MDR4/PGP4 (P-GLYCOPROTEIN4); ATPase, coupled to transmembrane movement of substances / xenobiotic-transporting ATPase [AT2G47000.1]	TC300521	AT2G47000.1
A_84_P12621		-1.09239		serine/threonine protein kinase, putative [AT2G47060.1]	TC288744	AT2G47060.1
A_84_P848564		-1.32118		serine/threonine protein kinase, putative [AT2G47060.1]	TC301551	AT2G47060.1
A_84_P23024		1.59031	1.42008	short-chain dehydrogenase/reductase (SDR) family protein [AT2G47140.1]	TC292604	AT2G47140.1
A_84_P19116		-1.2939		WRKY23 (WRKY DNA-binding protein 23); transcription factor [AT2G47260.1]	TC286886	AT2G47260.1
A_84_P15357		-1.39969		microtubule motor [AT2G47500.1]	NP456773	AT2G47500.1
A_84_P22924	1.96876	1.42523	1.76749	pectinesterase family protein [AT2G47550.1]	TC293995	AT2G47550.1
A_84_P15359			1.68987	esterase/lipase/thioesterase family protein [AT2G47630.1]	TC287181	AT2G47630.1
A_84_P809187		1.03872	2.0496	esterase/lipase/thioesterase family protein [AT2G47630.1]	TC304592	AT2G47630.1
A_84_P10636	-1.13727	-1.04413		invertase/pectin methylesterase inhibitor family protein [AT2G47670.1]	TC292525	AT2G47670.1
A_84_P855789		1.05964		ATGSTF8 (GLUTATHIONE S-TRANSFERASE 8); glutathione transferase [AT2G47730.1]	NP044134	AT2G47730.1
A_84_P18196		1.05052		ATGSTF8 (GLUTATHIONE S-TRANSFERASE 8); glutathione transferase [AT2G47730.1]	NP044134	AT2G47730.1
A_84_P257260		-2.43915		rubber elongation factor (REF) protein-related [AT2G47780.1]	TC293605	AT2G47780.1
A_84_P11580		-1.82095		glutaredoxin family protein [AT2G47870.1]	TC309744	AT2G47870.1
A_84_P13470	-1.09627			zinc finger (B-box type) family protein [AT2G47890.1]	TC298710	AT2G47890.1
A_84_P514578		-1.02425		similar to unnamed protein product [Vitis vinifera] (GB:CAO22459.1); contains domain PTHR13167:SF2 (PTHR13167:SF2); contains domain PTHR13167 (PTHR13167) [AT2G48040.1]	TC308515	AT2G48040.1
A_84_P23975		1.08325		WRKY58 (WRKY DNA-binding protein 58); transcription factor [AT3G01080.1]	NP332187	AT3G01080.1
A_84_P226169		-1.91263		oxygen evolving enhancer 3 (PsbQ) family protein [AT3G01440.1]	TC292522	AT3G01440.1
A_84_P809506		-1.41287		CA1 (CARBONIC ANHYDRASE 1); carbonate dehydratase/ zinc ion binding [AT3G01500.2]	TC287994	AT3G01500.2
A_84_P809517		-1.53369		CA1 (CARBONIC ANHYDRASE 1); carbonate dehydratase/ zinc ion binding [AT3G01500.2]	TC287994	AT3G01500.2
A_84_P809513		-1.54373		CA1 (CARBONIC ANHYDRASE 1); carbonate dehydratase/ zinc ion binding [AT3G01500.2]	TC287994	AT3G01500.2
A_84_P809499		-1.71166		CA1 (CARBONIC ANHYDRASE 1); carbonate dehydratase/ zinc ion binding [AT3G01500.2]	TC287994	AT3G01500.2
A_84_P850677		-1.07335		CA1 (CARBONIC ANHYDRASE 1); carbonate dehydratase/ zinc ion binding [AT3G01500.2]	TC305362	AT3G01500.2
A_84_P856078		-1.63992		CA1 (CARBONIC ANHYDRASE 1); carbonate dehydratase/ zinc ion binding [AT3G01500.2]	TC310247	AT3G01500.2
A_84_P585620		1.47826	1.67962	similar to unknown protein [Arabidopsis thaliana] (TAIR:AT5G14730.1); similar to hypothetical protein [Vitis vinifera] (GB:CAN65788.1) [AT3G01513.1]	TC295277	AT3G01513.1
A_84_P19248		-1.13857		triose phosphate/phosphate translocator, putative [AT3G01550.1]	NP332299	AT3G01550.1
A_84_P603421		-2.2049		unknown protein [AT3G01960.1]	TC304235	AT3G01960.1
A_84_P843286			1.12896	ACR6 (ACT Domain Repeat 6) [AT3G01990.1]	NP332359	AT3G01990.1
A_84_P610533	1.39756			hydrolase, alpha/beta fold family protein [AT3G02030.1]		AT3G02030.1
A_84_P181994	1.61155	1.25872	1.55829	SRG3 (SENESCENCE-RELATED GENE 3); glycerophosphodiester phosphodiesterase [AT3G02040.1]	TC304493	AT3G02040.1
A_84_P856982	2.17136		1.9946	SRG3 (SENESCENCE-RELATED GENE 3); glycerophosphodiester phosphodiesterase [AT3G02040.1]	TC310783	AT3G02040.1
A_84_P20197		1.05033		60S ribosomal protein L39 (RPL39B) [AT3G02190.1]	TC308798	AT3G02190.1
A_84_P18305		1.54517	1.12784	RGP1 (REVERSIBLY GLYCOSYLATED POLYPEPTIDE 1) [AT3G02230.1]	TC286442	AT3G02230.1
A_84_P550058		4.32466		similar to unknown protein [Arabidopsis thaliana] (TAIR:AT3G02242.1) [AT3G02240.1]	TC308890	AT3G02240.1
A_84_P762727		3.84565		similar to unknown protein [Arabidopsis thaliana] (TAIR:AT3G02240.1) [AT3G02242.1]		AT3G02242.1
A_84_P12633		2.88735	1.98681	eIF4-gamma/eIF5/eIF2-epsilon domain-containing protein [AT3G02270.1]	NP502466	AT3G02270.1
A_84_P20292		-2.18531		COL2 (CONSTANS-LIKE 2); transcription factor/ zinc ion binding [AT3G02380.1]	TC293154	AT3G02380.1
A_84_P809488		1.19388		SAMDC (S-ADENOSYLMETHIONINE DECARBOXYLASE) [AT3G02470.3]	TC282991	AT3G02470.3
A_84_P546516		1.17626		pentatricopeptide (PPR) repeat-containing protein [AT3G02490.1]	TC282258	AT3G02490.1
A_84_P540304		-1.11004		similar to unknown protein [Arabidopsis thaliana] (TAIR:AT5G16030.1); similar to hypothetical protein [Cleome spinosa] (GB:ABD96956.1) [AT3G02500.1]		AT3G02500.1
A_84_P843312		-1.17292		integral membrane family protein [AT3G02690.1]	NP332606	AT3G02690.1
A_84_P245345		-1.0586		integral membrane family protein [AT3G02690.1]	TC289864	AT3G02690.1
A_84_P18330		-1.4069		ATF1/TRXF1 (THIOREDOXIN F-TYPE 1); thiol-disulfide exchange intermediate [AT3G02730.1]	TC293025	AT3G02730.1
A_84_P23059	-1.0689			SKOR (stelar K+ outward rectifier); cyclic nucleotide binding / outward rectifier potassium channel [AT3G02850.1]	TC281186	AT3G02850.1
A_84_P21167			1.10876	ILR1 (IAA-LEUCINE RESISTANT 1); metallopeptidase [AT3G02875.1]	TC307020	AT3G02875.1
A_84_P820912			1.13052	ILR1 (IAA-LEUCINE RESISTANT 1); metallopeptidase [AT3G02875.1]	TC307020	AT3G02875.1
A_84_P10767	-1.12553			ATHSFA1E (Arabidopsis thaliana heat shock transcription factor A1E); DNA binding / transcription factor [AT3G02990.1]	TC285867	AT3G02990.1
A_84_P762197		-1.20407		similar to Os01g0644200 [Oryza sativa (japonica cultivar-group)] (GB:NP_001043697.1); similar to unknown [Picea sitchensis] (GB:ABK22613.1) [AT3G03341.1]	TC301957	AT3G03341.1
A_84_P113792		-1.17764		leucine-rich repeat transmembrane protein kinase, putative [AT3G03770.1]	TC280971	AT3G03770.1
A_84_P788639		-1.16418		leucine-rich repeat transmembrane protein kinase, putative [AT3G03770.1]	TC313698	AT3G03770.1
A_84_P10758		1.52538		ANAC047 (Arabidopsis NAC domain containing protein 47); transcription factor [AT3G04070.1]	TC291904	AT3G04070.1
A_84_P820193		1.69257		ANAC047 (Arabidopsis NAC domain containing protein 47) [AT3G04070.2]	TC299814	AT3G04070.2
A_84_P16440		-1.01506		ankyrin repeat family protein [AT3G04140.1]	TC282229	AT3G04140.1
A_84_P12659	-1.67578			germin-like protein, putative [AT3G04200.1]	TC293958	AT3G04200.1
A_84_P86799	-1.00231	-1.23504		SUVR4; histone-lysine N-methyltransferase [AT3G04380.1]	TC287526	AT3G04380.1
A_84_P522586		-1.16121	-1.00364	SUVR4 [AT3G04380.2]	TC287526	AT3G04380.2
A_84_P18331			1.692	PPCK2 (PHOSPHOENOLPYRUVATE CARBOXYLASE KINASE 2); kinase [AT3G04530.1]	NP332390	AT3G04530.1
A_84_P20212		1.02994		ankyrin repeat family protein [AT3G04710.1]	TC283634	AT3G04710.1
A_84_P825740		1.17131		RPSAB (40S RIBOSOMAL PROTEIN SA B); structural constituent of ribosome [AT3G04770.1]	TC289851	AT3G04770.1
A_84_P551820		1.16938		RPSAB (40S RIBOSOMAL PROTEIN SA B); structural constituent of ribosome [AT3G04770.1]	TC289851	AT3G04770.1
A_84_P761256		2.26191	1.27759	LCR18 (Low-molecular-weight cysteine-rich 18) [AT3G04945.1]		AT3G04945.1
A_84_P10735		1.03563		SAR DNA-binding protein, putative [AT3G05060.1]	TC309195	AT3G05060.1
A_84_P14516		2.2165		disease resistance family protein / LRR family protein [AT3G05360.1]	TC281338	AT3G05360.1
A_84_P502161		1.17087		similar to unknown protein [Arabidopsis thaliana] (TAIR:AT4G01240.1); similar to unnamed protein product [Vitis vinifera] (GB:CAO17562.1); similar to hypothetical protein [Vitis vinifera] (GB:CAN77378.1); contains domain SSF53335 (SSF53335); contains domain PROKAR_LIPOPROTEIN (PS51257) [AT3G05390.1]	TC285979	AT3G05390.1
A_84_P23992		-1.75628		protein phosphatase 2C, putative / PP2C, putative [AT3G05640.1]	TC289351	AT3G05640.1
A_84_P799914		-1.52748		protein phosphatase 2C, putative / PP2C, putative [AT3G05640.2]	TC297224	AT3G05640.2
A_84_P22100		1.36255		kinase/ protein binding [AT3G05660.1]	NP502526	AT3G05660.1
A_84_P852482		1.4003		kinase/ protein binding [AT3G05660.1]	TC307573	AT3G05660.1
A_84_P90109		-1.70233		transcription factor [AT3G05800.1]	TC291344	AT3G05800.1
A_84_P117182		-1.32068		RCI2B (RARE-COLD-INDUCIBLE 2B) [AT3G05890.1]	TC300616	AT3G05890.1
A_84_P599886	-1.8247			similar to unnamed protein product [Vitis vinifera] (GB:CAO71096.1) [AT3G06145.1]	TC300807	AT3G06145.1
A_84_P788572		-1.07143		similar to unknown protein [Arabidopsis thaliana] (TAIR:AT5G19060.1); similar to unnamed protein product [Vitis vinifera] (GB:CAO71094.1); contains InterPro domain Immunoglobulin E-set (InterPro:IPR014756) [AT3G06150.1]	TC289683	AT3G06150.1
A_84_P562958		3.88997		DNA binding / transcription factor [AT3G06220.1]	TC295522	AT3G06220.1
A_84_P18334		1.19008		MYB108 (MYB DOMAIN PROTEIN 108); DNA binding / transcription factor [AT3G06490.1]	TC290478	AT3G06490.1
A_84_P87399		-1.24787		agenet domain-containing protein [AT3G06520.1]	TC282175	AT3G06520.1
A_84_P761249		-1.28977		LCR44 (Low-molecular-weight cysteine-rich 44) [AT3G06985.1]		AT3G06985.1
A_84_P761578		-1.27759		Encodes a Defensin-like (DEFL) family protein [pseudogene] [AT3G06995.1]		AT3G06995.1
A_84_P18319	-1.06933			zinc finger (C3HC4-type RING finger) family protein [AT3G07200.1]	TC298259	AT3G07200.1
A_84_P575806		-1.10676		similar to unknown protein [Arabidopsis thaliana] (TAIR:AT3G60990.1); similar to unknown protein [Arabidopsis thaliana] (TAIR:AT5G48190.1); similar to unknown [Populus trichocarpa] (GB:ABK94817.1); contains InterPro domain Protein of unknown function DUF23 (InterPro:IPR008166) [AT3G07380.1]	TC309841	AT3G07380.1
A_84_P804807		2.31831	1.88273	AIR12 (Auxin-Induced in Root cultures 12); extracellular matrix structural constituent [AT3G07390.1]	TC298957	AT3G07390.1
A_84_P804827		2.36142	1.92728	AIR12 (Auxin-Induced in Root cultures 12); extracellular matrix structural constituent [AT3G07390.1]	TC310823	AT3G07390.1
A_84_P803220		2.23514	1.81902	AIR12 (Auxin-Induced in Root cultures 12); extracellular matrix structural constituent [AT3G07390.1]	TC310823	AT3G07390.1
A_84_P155785		2.03228	1.73288	AIR12 (Auxin-Induced in Root cultures 12); extracellular matrix structural constituent [AT3G07390.1]	TC310823	AT3G07390.1
A_84_P12654	-1.03725			SET domain-containing protein [AT3G07670.1]	TC283169	AT3G07670.1
A_84_P831886		1.09756	1.12185	ATP binding [AT3G07770.1]	TC281307	AT3G07770.1
A_84_P12655		2.42834		polygalacturonase, putative / pectinase, putative [AT3G07970.1]	TC309658	AT3G07970.1
A_84_P22110		5.18493		LTP6 (Lipid transfer protein 6); lipid binding [AT3G08770.1]	TC298716	AT3G08770.1
A_84_P813812		4.35031		LTP6 (Lipid transfer protein 6); lipid binding [AT3G08770.1]	TC313047	AT3G08770.1
A_84_P860810		3.8631		LTP6 (Lipid transfer protein 6); lipid binding [AT3G08770.1]	TC313047	AT3G08770.1
A_84_P574921		1.01824		kelch repeat-containing F-box family protein [AT3G08810.1]	TC299825	AT3G08810.1
A_84_P176534		-1.17489		rhodanese-like domain-containing protein [AT3G08920.1]	TC293477	AT3G08920.1
A_84_P822010		-1.23541		rhodanese-like domain-containing protein [AT3G08920.1]	TC293477	AT3G08920.1
A_84_P23977		1.07017		protein kinase family protein [AT3G09010.1]	NP332461	AT3G09010.1
A_84_P509282		1.33959		mRNA capping enzyme family protein [AT3G09100.1]	TC295830	AT3G09100.1
A_84_P760525		2.91133		amino acid transporter family protein [AT3G09330.1]		AT3G09330.1
A_84_P843805		3.18444		amino acid transporter family protein [AT3G09340.1]	NP502553	AT3G09340.1
A_84_P530576		3.48287		amino acid transporter family protein [AT3G09340.1]		AT3G09340.1
A_84_P271340		1.31831		armadillo/beta-catenin repeat family protein [AT3G09350.1]	TC285310	AT3G09350.1
A_84_P821119		1.29814		armadillo/beta-catenin repeat family protein [AT3G09350.2]	NP502554	AT3G09350.2
A_84_P532349		1.02407		ATEXO70H4 (exocyst subunit EXO70 family protein H4); protein binding [AT3G09520.1]	TC303896	AT3G09520.1
A_84_P11707		-1.28988		amine oxidase family protein [AT3G09580.1]	TC284552	AT3G09580.1
A_84_P17379	-1.88153			APX2 (ASCORBATE PEROXIDASE 2); L-ascorbate peroxidase [AT3G09640.1]	TC307593	AT3G09640.1
A_84_P16437		-1.97479		auxin-responsive family protein [AT3G09870.1]	TC309031	AT3G09870.1
A_84_P18315		1.97584		ATMDAR3/MDHAR (MONODEHYDROASCORBATE REDUCTASE); monodehydroascorbate reductase (NADH) [AT3G09940.1]	TC285098	AT3G09940.1
A_84_P856766		4.29324	4.66889	similar to unknown protein [Arabidopsis thaliana] (TAIR:AT5G55620.1); similar to unknown protein [Arabidopsis thaliana] (TAIR:AT3G55570.1); similar to unnamed protein product [Vitis vinifera] (GB:CAO39940.1) [AT3G09950.1]	TC310665	AT3G09950.1
A_84_P555382		4.3994	4.7506	similar to unknown protein [Arabidopsis thaliana] (TAIR:AT5G55620.1); similar to unknown protein [Arabidopsis thaliana] (TAIR:AT3G55570.1); similar to unnamed protein product [Vitis vinifera] (GB:CAO39940.1) [AT3G09950.1]		AT3G09950.1
A_84_P17369	1.25809	2.02682		calcineurin-like phosphoesterase family protein [AT3G09960.1]	TC288961	AT3G09960.1
A_84_P21141	-1.56819			dehydration-responsive protein-related [AT3G10200.1]	TC284467	AT3G10200.1
A_84_P856887	1.01569			SAG20 (WOUND-INDUCED PROTEIN 12) [AT3G10985.1]	TC310741	AT3G10985.1
A_84_P760741		1.10719		disease resistance family protein / LRR family protein [AT3G11010.1]	TC280921	AT3G11010.1
A_84_P822840		2.16827		UDP-glucoronosyl/UDP-glucosyl transferase family protein [AT3G11340.1]	TC297576	AT3G11340.1
A_84_P74014		1.81304		UDP-glucoronosyl/UDP-glucosyl transferase family protein [AT3G11340.1]	TC297576	AT3G11340.1
A_84_P312153		1.30635		ATGPAT5/GPAT5 (GLYCEROL-3-PHOSPHATE ACYLTRANSFERASE 5); 1-acylglycerol-3-phosphate O-acyltransferase/ acyltransferase/ organic anion transmembrane transporter [AT3G11430.1]	TC284644	AT3G11430.1
A_84_P234289		1.35219		similar to unknown protein [Arabidopsis thaliana] (TAIR:AT5G06220.1); similar to unnamed protein product [Vitis vinifera] (GB:CAO15863.1) [AT3G11560.1]	TC299698	AT3G11560.1
A_84_P18401		1.36942		HSP70 (heat shock protein 70); ATP binding [AT3G12580.1]	TC281774	AT3G12580.1
A_84_P17455		-1.77626		DRT100 (DNA-DAMAGE REPAIR/TOLERATION 100); protein binding [AT3G12610.1]	TC301915	AT3G12610.1
A_84_P23094		1.49031		nucleolar protein Nop56, putative [AT3G12860.1]	TC305289	AT3G12860.1
A_84_P21737		-1.02104		SRF4 (STRUBBELIG-RECEPTOR FAMILY 4); ATP binding / kinase/ protein serine/threonine kinase [AT3G13065.1]	TC299310	AT3G13065.1
A_84_P245905		1.16688		RNA binding [AT3G13230.1]	TC291746	AT3G13230.1
A_84_P761767	1.71806	2.15305		unknown protein [AT3G13432.1]	TC309266	AT3G13432.1
A_84_P535912	1.52506	2.35507	1.92969	similar to unknown protein [Arabidopsis thaliana] (TAIR:AT1G55365.1) [AT3G13500.1]	NP226389	AT3G13500.1
A_84_P19339		-1.56906		disease resistance response [AT3G13650.1]	TC296542	AT3G13650.1
A_84_P14610		1.07387		NAP1;4 (NUCLEOSOME ASSEMBLY PROTEIN1;4); DNA binding [AT3G13782.1]	TC298728	AT3G13782.1
A_84_P17447		1.95055		ATBFRUCT1/ATCWINV1 (ARABIDOPSIS THALIANA CELL WALL INVERTASE 1); beta-fructofuranosidase/ hydrolase, hydrolyzing O-glycosyl compounds [AT3G13790.1]	NP226898	AT3G13790.1
A_84_P111702		1.13856		DNA binding / DNA-directed RNA polymerase [AT3G13940.1]	TC286610	AT3G13940.1
A_84_P786301		1.0288		DNA binding / DNA-directed RNA polymerase [AT3G13940.1]	TC286610	AT3G13940.1
A_84_P831744		-1.07747		ATBRXL2/BRX-LIKE2 [AT3G14000.2]	NP301788	AT3G14000.2
A_84_P119322		1.32786		similar to unknown protein [Arabidopsis thaliana] (TAIR:AT1G54120.1); similar to unnamed protein product [Vitis vinifera] (GB:CAO45609.1) [AT3G14060.1]	TC298041	AT3G14060.1
A_84_P12281			2.16359	GLIP4; carboxylesterase [AT3G14225.1]		AT3G14225.1
A_84_P14557		-1.16314		SRF7 (STRUBBELIG-RECEPTOR FAMILY 7); ATP binding / protein serine/threonine kinase [AT3G14350.1]	TC281843	AT3G14350.1
A_84_P828773		-1.62195		lipase class 3 family protein [AT3G14360.1]	TC296163	AT3G14360.1
A_84_P17007	-1.00558	-1.12819		(S)-2-hydroxy-acid oxidase, peroxisomal, putative / glycolate oxidase, putative / short chain alpha-hydroxy acid oxidase, putative [AT3G14415.1]	TC311356	AT3G14415.1
A_84_P167863		-1.22472		(S)-2-hydroxy-acid oxidase, peroxisomal, putative / glycolate oxidase, putative / short chain alpha-hydroxy acid oxidase, putative [AT3G14420.1]	TC312313	AT3G14420.1
A_84_P810869		-1.14518		(S)-2-hydroxy-acid oxidase, peroxisomal, putative / glycolate oxidase, putative / short chain alpha-hydroxy acid oxidase, putative [AT3G14420.2]	TC311509	AT3G14420.2
A_84_P810878		-1.30422		(S)-2-hydroxy-acid oxidase, peroxisomal, putative / glycolate oxidase, putative / short chain alpha-hydroxy acid oxidase, putative [AT3G14420.3]	TC311509	AT3G14420.3
A_84_P810875		-1.14732		(S)-2-hydroxy-acid oxidase, peroxisomal, putative / glycolate oxidase, putative / short chain alpha-hydroxy acid oxidase, putative [AT3G14420.6]	TC313467	AT3G14420.6
A_84_P260570		1.22479		similar to SART-1 family protein [Arabidopsis thaliana] (TAIR:AT5G16780.1); similar to hypothetical protein OsJ_006675 [Oryza sativa (japonica cultivar-group)] (GB:EAZ23192.1); similar to Os02g0511500 [Oryza sativa (japonica cultivar-group)] (GB:NP_001046936.1); similar to hypothetical protein OsI_007241 [Oryza sativa (indica cultivar-group)] (GB:EAY86008.1); contains InterPro domain SART-1 prote…	TC313842	AT3G14700.1
A_84_P503581		-1.7027		similar to DOG1 (DELAY OF GERMINATION 1) [Arabidopsis thaliana] (TAIR:AT5G45830.1); similar to tumor-related protein-like, putative [Medicago truncatula] (GB:ABD32966.1) [AT3G14880.1]	NP225063	AT3G14880.1
A_84_P594570	-1.56619			similar to unknown protein [Arabidopsis thaliana] (TAIR:AT5G53900.2); similar to unnamed protein product [Vitis vinifera] (GB:CAO39314.1); contains domain gb def: At3g15240 (PTHR13902:SF3); contains domain SERINE/THREONINE-PROTEIN KINASE WNK (WITH NO LYSINE)-RELATED (PTHR13902) [AT3G15240.2]	TC292764	AT3G15240.2
A_84_P102366		-2.18903		similar to unnamed protein product [Vitis vinifera] (GB:CAO66421.1) [AT3G15280.1]	TC302203	AT3G15280.1
A_84_P834058		1.72754		PPI2 (PROTON PUMP INTERACTOR 2) [AT3G15340.1]	NP227117	AT3G15340.1
A_84_P582979		1.70932		PPI2 (PROTON PUMP INTERACTOR 2) [AT3G15340.1]		AT3G15340.1
A_84_P762419		1.03724		similar to hypothetical protein [Nicotiana benthamiana] (GB:BAF02554.1) [AT3G15518.1]	TC295801	AT3G15518.1
A_84_P81409	1.44319			similar to unknown protein [Arabidopsis thaliana] (TAIR:AT1G52720.1); similar to unnamed protein product [Vitis vinifera] (GB:CAO46032.1); similar to hypothetical protein [Vitis vinifera] (GB:CAN71657.1) [AT3G15630.1]	TC298954	AT3G15630.1
A_84_P818968	1.52979			similar to unknown protein [Arabidopsis thaliana] (TAIR:AT1G52720.1); similar to unnamed protein product [Vitis vinifera] (GB:CAO46032.1); similar to hypothetical protein [Vitis vinifera] (GB:CAN71657.1) [AT3G15630.1]	TC300351	AT3G15630.1
A_84_P11727	-3.65884	-4.15111		late embryogenesis abundant protein, putative / LEA protein, putative [AT3G15670.1]	TC290056	AT3G15670.1
A_84_P112392		1.06801		(TSA1-LIKE); protein binding [AT3G15950.1]	TC281263	AT3G15950.1
A_84_P19307		2.52093		DNA mismatch repair MutS family protein [AT3G15960.1]	NP227306	AT3G15960.1
A_84_P11724		1.15398		L-asparaginase, putative / L-asparagine amidohydrolase, putative [AT3G16150.1]	TC290404	AT3G16150.1
A_84_P809662		-1.02921		ferredoxin-related [AT3G16250.1]	TC305049	AT3G16250.1
A_84_P10789		-1.02169		ferredoxin-related [AT3G16250.1]		AT3G16250.1
A_84_P201258		2.28409		DNA binding / transcription factor [AT3G16280.1]	TC293646	AT3G16280.1
A_84_P845859		-1.13173		GDSL-motif lipase/hydrolase family protein [AT3G16370.1]	TC293886	AT3G16370.1
A_84_P582082		-1.51467		GDSL-motif lipase/hydrolase family protein [AT3G16370.1]	TC309916	AT3G16370.1
A_84_P801437		-1.09212		GDSL-motif lipase/hydrolase family protein [AT3G16370.1]	TC310903	AT3G16370.1
A_84_P858659		-1.11024		GDSL-motif lipase/hydrolase family protein [AT3G16370.1]	TC311727	AT3G16370.1
A_84_P812126	1.17862			ATMLP-470 (MYROSINASE-BINDING PROTEIN-LIKE PROTEIN-470) [AT3G16400.1]	TC300401	AT3G16400.1
A_84_P105636	1.04109			ATMLP-470 (MYROSINASE-BINDING PROTEIN-LIKE PROTEIN-470) [AT3G16400.1]	TC308574	AT3G16400.1
A_84_P812128	1.05534			ATMLP-470 (MYROSINASE-BINDING PROTEIN-LIKE PROTEIN-470) [AT3G16400.1]	TC312470	AT3G16400.1
A_84_P152498		-1.26324		RALFL23 (RALF-LIKE 23) [AT3G16570.1]	TC303639	AT3G16570.1
A_84_P19303		-1.02104		peroxidase, putative [AT3G17070.1]	TC288628	AT3G17070.1
A_84_P558950		-1.97152		invertase/pectin methylesterase inhibitor family protein [AT3G17130.1]	NP210797	AT3G17130.1
A_84_P21196		-1.6792		pyridoxal-dependent decarboxylase family protein [AT3G17720.1]	NP227331	AT3G17720.1
A_84_P613251		2.69016		contains domain PROKAR_LIPOPROTEIN (PS51257) [AT3G18250.1]		AT3G18250.1
A_84_P16471		1.34379		similar to unknown protein [Arabidopsis thaliana] (TAIR:AT3G18460.1); similar to unnamed protein product [Vitis vinifera] (GB:CAO68031.1); contains InterPro domain Protein of unknown function Cys-rich (InterPro:IPR006461) [AT3G18450.1]	TC298092	AT3G18450.1
A_84_P17417	1.42348	1.60235		similar to unknown protein [Arabidopsis thaliana] (TAIR:AT3G18450.1); similar to unnamed protein product [Vitis vinifera] (GB:CAO68031.1); contains InterPro domain Protein of unknown function Cys-rich (InterPro:IPR006461) [AT3G18460.1]	NP301550	AT3G18460.1
A_84_P24037		1.1897		ATPLT5 (POLYOL TRANSPORTER 5); D-ribose transmembrane transporter/ D-xylose transmembrane transporter/ carbohydrate transmembrane transporter/ galactose transmembrane transporter/ glucose transmembrane transporter/ glycerol transmembrane transporter/ hydr [AT3G18830.1]	TC291684	AT3G18830.1
A_84_P821587	-1.84018			LPAT5 [AT3G18850.4]	TC300909	AT3G18850.4
A_84_P143099			-1.68425	binding / catalytic/ coenzyme binding [AT3G18890.1]	NP226838	AT3G18890.1
A_84_P301400		1.07151		transducin family protein / WD-40 repeat family protein [AT3G18950.1]	TC285435	AT3G18950.1
A_84_P836351		-1.31186		leucine-rich repeat family protein [AT3G19230.1]	NP227074	AT3G19230.1
A_84_P120712		1.0621		zinc finger (CCCH-type) family protein [AT3G19360.1]	TC312672	AT3G19360.1
A_84_P18353			1.10884	CAD4 (CINNAMYL ALCOHOL DEHYDROGENASE 4); cinnamyl-alcohol dehydrogenase [AT3G19450.1]	TC286019	AT3G19450.1
A_84_P816246			1.23318	CAD4 (CINNAMYL ALCOHOL DEHYDROGENASE 4); cinnamyl-alcohol dehydrogenase [AT3G19450.1]	TC286019	AT3G19450.1
A_84_P792060	1.60604	2.5045		unknown protein [AT3G19615.1]	NP227087	AT3G19615.1
A_84_P761897	1.601	2.42793		unknown protein [AT3G19615.1]	NP227087	AT3G19615.1
A_84_P50620		-1.00513		ARC5 (ACCUMULATION AND REPLICATION OF CHLOROPLAST 5); GTP binding / GTPase [AT3G19720.1]	NP227099	AT3G19720.1
A_84_P293484		-1.31387		similar to unnamed protein product [Vitis vinifera] (GB:CAO15360.1) [AT3G19800.1]	TC311708	AT3G19800.1
A_84_P587454		-1.603		phototropic-responsive NPH3 family protein [AT3G19850.1]	TC282744	AT3G19850.1
A_84_P304550		2.64128		similar to unknown protein [Arabidopsis thaliana] (TAIR:AT5G64230.1); similar to unnamed protein product [Vitis vinifera] (GB:CAO44392.1) [AT3G19920.1]	TC287429	AT3G19920.1
A_84_P202108			-1.00939	pepsin A [AT3G20015.1]	TC304760	AT3G20015.1
A_84_P14595		2.59775		CYP705A20 (cytochrome P450, family 705, subfamily A, polypeptide 20); oxygen binding [AT3G20110.1]	TC284451	AT3G20110.1
A_84_P841569	-1.40335	-1.70735		extracellular ligand-gated ion channel [AT3G20300.1]	NP227414	AT3G20300.1
A_84_P18366	1.50867	1.27653	1.47755	encodes a glycine-rich protein that is expressed more abundantly in immature seed pods than in stems and leaves. Expression is not detected in roots or flowers. [AT3G20470.1]	TC304931	AT3G20470.1
A_84_P808228	1.02596			encodes a glycine-rich protein that is expressed more abundantly in immature seed pods than in stems and leaves. Expression is not detected in roots or flowers. [AT3G20470.1]	TC310720	AT3G20470.1
A_84_P16492	-1.12553			zinc finger (B-box type) family protein [AT3G21150.1]	TC294669	AT3G21150.1
A_84_P18352		1.39455		4CL5 (4-COUMARATE:COA LIGASE 5); 4-coumarate-CoA ligase [AT3G21230.1]	TC283471	AT3G21230.1
A_84_P761907		3.19829		unknown protein [AT3G21352.1]		AT3G21352.1
A_84_P841311		-1.52822		electron carrier/ protein disulfide oxidoreductase [AT3G21460.1]	NP226911	AT3G21460.1
A_84_P761404		-1.49864		electron carrier/ protein disulfide oxidoreductase [AT3G21460.1]		AT3G21460.1
A_84_P521758		1.25356		similar to BRCT domain-containing protein [Arabidopsis thaliana] (TAIR:AT4G03130.1); similar to unnamed protein product [Vitis vinifera] (GB:CAO71038.1); contains InterPro domain BRCT; (InterPro:IPR001357) [AT3G21480.1]	TC280572	AT3G21480.1
A_84_P591022	1.53718	1.45884	1.49358	endonuclease/exonuclease/phosphatase family protein [AT3G21530.1]		AT3G21530.1
A_84_P761848		-1.44281		other RNA [AT3G21755.1]		AT3G21755.1
A_84_P18355		-1.27662		UDP-glucoronosyl/UDP-glucosyl transferase family protein [AT3G21760.1]	TC283850	AT3G21760.1
A_84_P854492		-1.7928		UDP-glucoronosyl/UDP-glucosyl transferase family protein [AT3G21760.1]	TC309173	AT3G21760.1
A_84_P15534	1.87791	2.13542		receptor-like protein kinase-related [AT3G21900.1]	NP226436	AT3G21900.1
A_84_P168633	2.09598	2.29621		pollen coat receptor kinase, putative [AT3G21920.1]	TC292161	AT3G21920.1
A_84_P311453	1.87603	2.08684		receptor-like protein kinase-related [AT3G21930.1]		AT3G21930.1
A_84_P19318	1.5707	1.71737	1.97943	receptor protein kinase-related [AT3G22060.1]	TC296713	AT3G22060.1
A_84_P600829		1.0375		similar to unknown protein [Arabidopsis thaliana] (TAIR:AT1G05370.1); similar to unnamed protein product [Vitis vinifera] (GB:CAO71162.1); contains InterPro domain Cellular retinaldehyde-binding/triple function, C-terminal (InterPro:IPR001251); contains InterPro domain Phosphatidylinositol transfer protein-like, N-terminal (InterPro:IPR011074) [AT3G22410.1]	TC308845	AT3G22410.1
A_84_P608809		1.27374		similar to unknown protein [Arabidopsis thaliana] (TAIR:AT5G27990.1); similar to unnamed protein product [Vitis vinifera] (GB:CAO71182.1); contains domain PTHR21250 (PTHR21250) [AT3G22510.1]	TC307162	AT3G22510.1
A_84_P230859	-1.27405			senescence-associated protein-related [AT3G22550.1]	TC291477	AT3G22550.1
A_84_P784627		1.08996	1.12524	protein kinase, putative [AT3G22750.1]	TC304169	AT3G22750.1
A_84_P24016		1.0651	1.07511	protein kinase, putative [AT3G22750.1]	TC304169	AT3G22750.1
A_84_P16449		-1.7812		ELIP1 (EARLY LIGHT-INDUCABLE PROTEIN); chlorophyll binding [AT3G22840.1]	TC291920	AT3G22840.1
A_84_P761148	1.01653			MIR167A; miRNA [AT3G22886.1]		AT3G22886.1
A_84_P20248			1.67608	ethylene-responsive factor, putative [AT3G23230.1]	TC304024	AT3G23230.1
A_84_P304480		1.22798		cyclopropane fatty acid synthase, putative / CPA-FA synthase, putative [AT3G23510.1]	NP301446	AT3G23510.1
A_84_P841591		1.25012		cyclopropane fatty acid synthase, putative / CPA-FA synthase, putative [AT3G23530.1]	NP227478	AT3G23530.1
A_84_P197124		1.28373		cyclopropane fatty acid synthase, putative / CPA-FA synthase, putative [AT3G23530.1]	TC280621	AT3G23530.1
A_84_P292144		1.23206		MATE efflux family protein [AT3G23550.1]	TC305936	AT3G23550.1
A_84_P16484		-1.29527		S1 RNA-binding domain-containing protein [AT3G23700.1]	TC300529	AT3G23700.1
A_84_P64294			1.16233	AMP-binding protein, putative [AT3G23790.1]	TC281813	AT3G23790.1
A_84_P19333		-1.0501		transferase family protein [AT3G23840.1]	TC305625	AT3G23840.1
A_84_P11769		1.54231		HSP60 (Heat shock protein 60); ATP binding / protein binding / unfolded protein binding [AT3G23990.1]	TC310180	AT3G23990.1
A_84_P760818		1.42332		pseudogene, chaperonin hsp60 (fragment), blastp match of 100% identity and 8.1e-06 P-value to GP [AT3G24005.1]		AT3G24005.1
A_84_P830397		1.00059		KRR1 family protein [AT3G24080.1]	TC304066	AT3G24080.1
A_84_P20269		-1.01691		HCF101 (HIGH-CHLOROPHYLL-FLUORESCENCE 101); ATP binding [AT3G24430.1]	NP301441	AT3G24430.1
A_84_P12676	-1.82705	-1.85069		AT-HSFC1 (Arabidopsis thaliana heat shock transcription factor C1); DNA binding / transcription factor [AT3G24520.1]	TC290210	AT3G24520.1
A_84_P827833	-1.9888			AT-HSFC1 (Arabidopsis thaliana heat shock transcription factor C1); DNA binding / transcription factor [AT3G24520.1]	TC290210	AT3G24520.1
A_84_P19314		-1.10351		ATP binding / protein kinase/ protein-tyrosine kinase [AT3G24715.1]		AT3G24715.1
A_84_P601724		1.17585		RIN4 (RPM1 INTERACTING PROTEIN 4); protein binding [AT3G25070.1]	TC294381	AT3G25070.1
A_84_P507571		2.32046		similar to unnamed protein product [Vitis vinifera] (GB:CAO15235.1) [AT3G25130.1]	TC311775	AT3G25130.1
A_84_P17413		1.268		ROF1 (ROTAMASE FKBP 1); FK506 binding / calmodulin binding / peptidyl-prolyl cis-trans isomerase [AT3G25230.1]	TC283793	AT3G25230.1
A_84_P597276		1.46431		similar to unknown protein [Arabidopsis thaliana] (TAIR:AT3G07350.1); similar to unnamed protein product [Vitis vinifera] (GB:CAO39951.1); contains InterPro domain Protein of unknown function DUF506, plant (InterPro:IPR006502) [AT3G25240.1]	TC297796	AT3G25240.1
A_84_P702276		1.237		similar to unknown protein [Arabidopsis thaliana] (TAIR:AT1G26140.1) [AT3G25597.1]	TC295986	AT3G25597.1
A_84_P612395	1.27521			unknown protein [AT3G25655.1]	TC298632	AT3G25655.1
A_84_P286390		1.52547		AOC3 (ALLENE OXIDE CYCLASE 3) [AT3G25780.1]	TC290740	AT3G25780.1
A_84_P762464			1.15261	other RNA [AT3G25795.1]		AT3G25795.1
A_84_P565178		1.61652		NIMIN-2 (NIM1-INTERACTING 2) [AT3G25882.1]	TC307461	AT3G25882.1
A_84_P72004		1.33753		AP2 domain-containing transcription factor, putative [AT3G25890.1]	TC307669	AT3G25890.1
A_84_P291194		-1.02858		plastid-lipid associated protein PAP / fibrillin family protein [AT3G26070.1]	TC295571	AT3G26070.1
A_84_P14560		1.17482		PAD3 (PHYTOALEXIN DEFICIENT 3); oxygen binding [AT3G26830.1]	TC285253	AT3G26830.1
A_84_P276620		-1.2009		similar to unknown protein [Arabidopsis thaliana] (TAIR:AT5G41050.1); similar to unnamed protein product [Vitis vinifera] (GB:CAO49052.1) [AT3G26960.1]	TC292191	AT3G26960.1
A_84_P24036	-1.32657			TOM20-1 (TRANSLOCASE OUTER MEMBRANE 20-1) [AT3G27070.1]	TC297772	AT3G27070.1
A_84_P868030		1.51756	1.52364	unknown protein [AT3G27415.1]	TC306571	AT3G27415.1
A_84_P712636		1.44085	1.2466	unknown protein [AT3G27415.1]	TC312656	AT3G27415.1
A_84_P24021	-1.56053		-1.1127	LHCB2:4 (Photosystem II light harvesting complex gene 2.3); chlorophyll binding [AT3G27690.1]	TC298404	AT3G27690.1
A_84_P808706			-1.19771	LHCB2:4 (Photosystem II light harvesting complex gene 2.3); chlorophyll binding [AT3G27690.1]	TC309238	AT3G27690.1
A_84_P606188		-1.58038		nodulin MtN3 family protein [AT3G28007.1]	NP301512	AT3G28007.1
A_84_P803335		-1.44631		nodulin MtN3 family protein [AT3G28007.1]	TC290887	AT3G28007.1
A_84_P100746		-2.0144		meprin and TRAF homology domain-containing protein / MATH domain-containing protein [AT3G28220.1]	TC305004	AT3G28220.1
A_84_P20289		-2.56073		Identical to UPF0496 protein At3g28270 [Arabidopsis Thaliana] (GB:Q9LHD9;GB:Q8H7D0;GB:Q8H7E9;GB:Q944H3); similar to AT14A [Arabidopsis thaliana] (TAIR:AT3G28290.1); similar to AT14A [Arabidopsis thaliana] (TAIR:AT3G28300.1); similar to unnamed protein product [Vitis vinifera] (GB:CAO22906.1); contains InterPro domain Protein of unknown function DUF677 (InterPro:IPR007749) [AT3G28270.1]	TC287627	AT3G28270.1
A_84_P822379		-2.41344		Identical to UPF0496 protein At3g28270 [Arabidopsis Thaliana] (GB:Q9LHD9;GB:Q8H7D0;GB:Q8H7E9;GB:Q944H3); similar to AT14A [Arabidopsis thaliana] (TAIR:AT3G28290.1); similar to AT14A [Arabidopsis thaliana] (TAIR:AT3G28300.1); similar to unnamed protein product [Vitis vinifera] (GB:CAO22906.1); contains InterPro domain Protein of unknown function DUF677 (InterPro:IPR007749) [AT3G28270.1]	TC297363	AT3G28270.1
A_84_P12725		2.31104		AAA-type ATPase family protein [AT3G28510.1]	TC284229	AT3G28510.1
A_84_P594615		4.35228		proline-rich extensin-like family protein [AT3G28550.1]	TC309305	AT3G28550.1
A_84_P203368		-1.50695		similar to unknown protein [Arabidopsis thaliana] (TAIR:AT3G28780.1); contains InterPro domain Protein of unknown function DUF1216 (InterPro:IPR009605) [AT3G28840.1]	TC289855	AT3G28840.1
A_84_P12680			-1.31419	ATEXPA5 (ARABIDOPSIS THALIANA EXPANSIN A5) [AT3G29030.1]	TC310549	AT3G29030.1
A_84_P536862	1.12935	1.13383		unknown protein [AT3G29034.1]	TC300297	AT3G29034.1
A_84_P762490	1.12176	1.68595		pseudogene of short-chain dehydrogenase/reductase (SDR) family [AT3G29252.1]	NP227251	AT3G29252.1
A_84_P842207		1.04567		pseudogene, similar to CTV.22, blastp match of 29% identity and 4.9e-74 P-value to GP [AT3G30120.1]	NP235465	AT3G30120.1
A_84_P14597		-2.81937		zinc finger (C3HC4-type RING finger) family protein [AT3G30460.1]	TC300266	AT3G30460.1
A_84_P812380	1.20389	2.78934		ERD5 (EARLY RESPONSIVE TO DEHYDRATION 5); proline dehydrogenase [AT3G30775.1]	TC301987	AT3G30775.1
A_84_P22153		2.64936		ERD5 (EARLY RESPONSIVE TO DEHYDRATION 5); proline dehydrogenase [AT3G30775.1]	TC301987	AT3G30775.1
A_84_P803506	1.46733	3.01457		ERD5 (EARLY RESPONSIVE TO DEHYDRATION 5); proline dehydrogenase [AT3G30775.1]	TC305173	AT3G30775.1
A_84_P803062		2.9742		ERD5 (EARLY RESPONSIVE TO DEHYDRATION 5); proline dehydrogenase [AT3G30775.1]	TC305173	AT3G30775.1
A_84_P53310		2.93487		catalytic/ transferase, transferring glycosyl groups [AT3G42180.1]	TC311794	AT3G42180.1
A_84_P761862		2.22869		similar to exostosin family protein [Capsella rubella] (GB:ABA18105.1) [AT3G42180.3]	TC301774	AT3G42180.3
A_84_P869953			1.41771	oxidoreductase, acting on the CH-CH group of donors [AT3G44540.2]	TC297155	AT3G44540.2
A_84_P808430		1.07592		HD2A (HISTONE DEACETYLASE 2A); nucleic acid binding / zinc ion binding [AT3G44750.1]	NP034604	AT3G44750.1
A_84_P160413		1.08864		HD2A (HISTONE DEACETYLASE 2A); nucleic acid binding / zinc ion binding [AT3G44750.1]	TC291329	AT3G44750.1
A_84_P17465		2.16799		similar to unknown protein [Arabidopsis thaliana] (TAIR:AT3G44770.1) [AT3G44760.1]	TC297692	AT3G44760.1
A_84_P13764		2.16659		lecithin:cholesterol acyltransferase family protein / LACT family protein [AT3G44830.1]	TC311296	AT3G44830.1
A_84_P17546		1.25097		FAMT (FARNESOIC ACID CARBOXYL-O-METHYLTRANSFERASE); S-adenosylmethionine-dependent methyltransferase/ farnesoic acid O-methyltransferase [AT3G44860.1]	TC289360	AT3G44860.1
A_84_P813757		1.17091		FAMT (FARNESOIC ACID CARBOXYL-O-METHYLTRANSFERASE); S-adenosylmethionine-dependent methyltransferase/ farnesoic acid O-methyltransferase [AT3G44860.1]	TC289360	AT3G44860.1
A_84_P18492		1.25825		S-adenosyl-L-methionine:carboxyl methyltransferase family protein [AT3G44870.1]	TC299726	AT3G44870.1
A_84_P832235		1.16247		S-adenosyl-L-methionine:carboxyl methyltransferase family protein [AT3G44870.1]	TC299726	AT3G44870.1
A_84_P24087	1.73267	1.38148	1.05483	ATNRT2.6 (Arabidopsis thaliana high affinity nitrate transporter 2.6); nitrate transmembrane transporter [AT3G45060.1]	TC283938	AT3G45060.1
A_84_P759080		1.29062		transposable element gene [AT3G45095.1]		AT3G45095.1
A_84_P14630		2.13829		lectin protein kinase family protein [AT3G45330.1]	NP175584	AT3G45330.1
A_84_P17468	-1.53952	-1.71097		NAXT1 (NITRATE EXCRETION TRANSPORTER1); nitrate efflux transmembrane transporter/ transporter [AT3G45650.1]	TC290709	AT3G45650.1
A_84_P784314	-1.54542	-1.63296		NAXT1 (NITRATE EXCRETION TRANSPORTER1); nitrate efflux transmembrane transporter/ transporter [AT3G45650.1]	TC290709	AT3G45650.1
A_84_P19360	-2.94195			proton-dependent oligopeptide transport (POT) family protein [AT3G45660.1]	NP180444	AT3G45660.1
A_84_P803603	-1.59065	-1.63089		proton-dependent oligopeptide transport (POT) family protein [AT3G45710.1]	TC310329	AT3G45710.1
A_84_P837793		1.97029		receptor protein kinase-related [AT3G45920.1]	TC297991	AT3G45920.1
A_84_P787902	2.6201	3.94616	3.54567	receptor protein kinase-related [AT3G46270.1]	NP214047	AT3G46270.1
A_84_P23147		3.48267	3.08951	protein kinase-related [AT3G46280.1]	TC288940	AT3G46280.1
A_84_P514686	1.29939	2.80034		similar to unknown protein [Arabidopsis thaliana] (TAIR:AT3G46310.1); similar to hypothetical protein [Vitis vinifera] (GB:CAN66779.1) [AT3G46300.1]		AT3G46300.1
A_84_P22203	1.59366	2.26906	1.89219	UDP-glucoronosyl/UDP-glucosyl transferase family protein [AT3G46650.1]	NP162728	AT3G46650.1
A_84_P10856		1.86023		UDP-glucoronosyl/UDP-glucosyl transferase family protein [AT3G46680.1]	TC292503	AT3G46680.1
A_84_P11802		2.84318	2.14028	UDP-glucoronosyl/UDP-glucosyl transferase family protein [AT3G46690.1]	TC286298	AT3G46690.1
A_84_P12747		2.65717	2.17261	UDP-glycosyltransferase/ transferase, transferring glycosyl groups [AT3G46700.1]	NP033924	AT3G46700.1
A_84_P14637		2.62349		UDP-glucoronosyl/UDP-glucosyl transferase family protein [AT3G46720.1]	TC307283	AT3G46720.1
A_84_P526212	-1.90981	-2.7335	-2.64257	similar to unknown protein [Arabidopsis thaliana] (TAIR:AT5G59080.1) [AT3G46880.1]	NP033906	AT3G46880.1
A_84_P15583	-1.19508			ATPHS2/PHS2 (ALPHA-GLUCAN PHOSPHORYLASE 2); phosphorylase/ transferase, transferring glycosyl groups [AT3G46970.1]	TC280735	AT3G46970.1
A_84_P195914	-2.30578	-1.87885		F-box family protein [AT3G47030.1]	TC287487	AT3G47030.1
A_84_P19367		1.96928		glycosyl hydrolase family 3 protein [AT3G47050.1]	TC302337	AT3G47050.1
A_84_P154325		-1.23232		similar to unknown [Populus trichocarpa] (GB:ABK95428.1) [AT3G47070.1]	TC303468	AT3G47070.1
A_84_P845406	1.60944	1.59525		ASN1 (DARK INDUCIBLE 6) [AT3G47340.1]	TC290715	AT3G47340.1
A_84_P19368	1.67142	1.74218		ASN1 (DARK INDUCIBLE 6) [AT3G47340.1]	TC313901	AT3G47340.1
A_84_P852295	1.60779	1.60475		ASN1 (DARK INDUCIBLE 6) [AT3G47340.3]	TC307389	AT3G47340.3
A_84_P23152		2.20813		invertase/pectin methylesterase inhibitor family protein [AT3G47380.1]	TC299911	AT3G47380.1
A_84_P12750		-1.21944		PEX11B [AT3G47430.1]	TC301544	AT3G47430.1
A_84_P18423		1.38859		calcium-binding EF hand family protein [AT3G47480.1]	TC298177	AT3G47480.1
A_84_P860746		-1.30091		unknown protein [AT3G47510.1]	TC312991	AT3G47510.1
A_84_P69514		-1.25022		similar to hypothetical protein OsI_020499 [Oryza sativa (indica cultivar-group)] (GB:EAY99266.1); similar to hypothetical protein OsJ_018975 [Oryza sativa (japonica cultivar-group)] (GB:EAZ35492.1); similar to unnamed protein product [Vitis vinifera] (GB:CAO64300.1) [AT3G48200.1]	TC303342	AT3G48200.1
A_84_P181494		-1.47572		CYP71A25 (cytochrome P450, family 71, subfamily A, polypeptide 25); oxygen binding [AT3G48280.1]	TC301584	AT3G48280.1
A_84_P257990		-1.29554		cysteine proteinase, putative [AT3G48350.1]	TC286864	AT3G48350.1
A_84_P139809		-1.76259		haloacid dehalogenase-like hydrolase family protein [AT3G48420.1]	TC288287	AT3G48420.1
A_84_P855892		-1.89804		haloacid dehalogenase-like hydrolase family protein [AT3G48420.1]	TC310143	AT3G48420.1
A_84_P286640		-2.12597		similar to unknown protein [Arabidopsis thaliana] (TAIR:AT5G63350.1); similar to unnamed protein product [Vitis vinifera] (GB:CAO68256.1) [AT3G48510.1]	TC308801	AT3G48510.1
A_84_P147408		1.31041		protein transport protein SEC61 gamma subunit, putative [AT3G48570.1]	TC300286	AT3G48570.1
A_84_P868259		1.13211		protein transport protein SEC61 gamma subunit, putative [AT3G48570.1]	TC309638	AT3G48570.1
A_84_P17481		1.60261		xyloglucan:xyloglucosyl transferase, putative / xyloglucan endotransglycosylase, putative / endo-xyloglucan transferase, putative [AT3G48580.1]	TC289747	AT3G48580.1
A_84_P569671		2.31334		similar to unknown protein [Arabidopsis thaliana] (TAIR:AT5G66670.2); similar to unknown protein [Arabidopsis thaliana] (TAIR:AT5G66670.1) [AT3G48640.1]	TC308930	AT3G48640.1
A_84_P787864		2.30214		similar to unknown protein [Arabidopsis thaliana] (TAIR:AT5G66670.2); similar to unknown protein [Arabidopsis thaliana] (TAIR:AT5G66670.1) [AT3G48640.1]	TC308930	AT3G48640.1
A_84_P22213		1.21603		pyruvate kinase family protein [AT3G49160.1]	TC281816	AT3G49160.1
A_84_P12757	-1.72632	-1.48015		pectinesterase family protein [AT3G49220.1]	TC283041	AT3G49220.1
A_84_P538662	-1.48161			unknown protein [AT3G49230.1]	NP173874	AT3G49230.1
A_84_P288904	1.59128			similar to unknown protein [Arabidopsis thaliana] (TAIR:AT5G24660.1); similar to unknown protein [Brassica rapa subsp. pekinensis] (GB:AAQ92331.1) [AT3G49570.1]	TC301173	AT3G49570.1
A_84_P169853	1.99224			similar to unknown protein [Arabidopsis thaliana] (TAIR:AT3G49570.1); similar to unknown protein [Brassica rapa subsp. pekinensis] (GB:AAQ92331.1) [AT3G49580.1]	TC299227	AT3G49580.1
A_84_P787853	1.80332		1.98958	similar to unknown protein [Arabidopsis thaliana] (TAIR:AT3G49570.1); similar to unknown protein [Brassica rapa subsp. pekinensis] (GB:AAQ92331.1) [AT3G49580.1]	TC302058	AT3G49580.1
A_84_P12759	-2.11568			BAM2 (big apical meristem 2); ATP binding / protein serine/threonine kinase [AT3G49670.1]	TC280635	AT3G49670.1
A_84_P815691	-1.92071			BAM2 (big apical meristem 2); ATP binding / protein serine/threonine kinase [AT3G49670.1]	TC311592	AT3G49670.1
A_84_P14649		-1.72782		ATMYB84/MYB84/RAX3 (myb domain protein 84); DNA binding / transcription factor [AT3G49690.1]	TC301160	AT3G49690.1
A_84_P803776	-1.19335			leucine-rich repeat family protein [AT3G49750.1]	TC304133	AT3G49750.1
A_84_P17486	-2.73322	-2.1586		ATBZIP5 (ARABIDOPSIS THALIANA BASIC LEUCINE-ZIPPER 5); DNA binding / transcription factor [AT3G49760.1]	NP166262	AT3G49760.1
A_84_P549287	-1.28173			similar to unknown protein [Arabidopsis thaliana] (TAIR:AT5G65925.1) [AT3G49820.1]	NP166268	AT3G49820.1
A_84_P14650		2.17931		peroxidase, putative [AT3G49960.1]	TC290281	AT3G49960.1
A_84_P846796		2.73575		binding [AT3G50030.1]	TC297922	AT3G50030.1
A_84_P609756		1.8202		binding [AT3G50030.1]		AT3G50030.1
A_84_P20325		-1.25213		MYB77; DNA binding / transcription factor [AT3G50060.1]	TC291266	AT3G50060.1
A_84_P22218	-1.42069			KICP-02; microtubule motor [AT3G50240.1]	NP209146	AT3G50240.1
A_84_P10871		1.39717		transferase family protein [AT3G50280.1]	NP209150	AT3G50280.1
A_84_P606215		1.05432		HR3 (HOMOLOG OF RPW8 3) [AT3G50470.1]	TC295534	AT3G50470.1
A_84_P16544		-1.03178		ICK2/KRP2 (KIP-RELATED PROTEIN 2); cyclin-dependent protein kinase inhibitor/ kinase inhibitor/ protein binding [AT3G50630.1]	NP182805	AT3G50630.1
A_84_P15599		-1.1104		PSBO-2/PSBO2 (PHOTOSYSTEM II SUBUNIT O-2); oxygen evolving/ poly(U) binding [AT3G50820.1]	TC288098	AT3G50820.1
A_84_P819509		-1.1524		COR413-PM2 (cold regulated 413 plasma membrane 2) [AT3G50830.1]	TC292221	AT3G50830.1
A_84_P243315		1.0569		similar to unknown protein [Arabidopsis thaliana] (TAIR:AT5G66490.1); similar to hypothetical protein [Thellungiella halophila] (GB:ABB45855.1) [AT3G50900.1]	TC300906	AT3G50900.1
A_84_P12765	-1.6643	-1.65997		XERO1 (DEHYDRIN XERO 1) [AT3G50980.1]	TC300585	AT3G50980.1
A_84_P514702	-1.91664			proline-rich family protein [AT3G51290.1]	TC297869	AT3G51290.1
A_84_P603549		1.06078		zinc finger (C3HC4-type RING finger) family protein [AT3G51325.1]	TC307878	AT3G51325.1
A_84_P583961		3.33845	3.39157	pepsin A [AT3G51340.1]	NP174130	AT3G51340.1
A_84_P845665		1.65698	2.35818	aspartyl protease family protein [AT3G51350.1]	TC292510	AT3G51350.1
A_84_P570578		1.42501		aspartyl protease family protein [AT3G51350.1]		AT3G51350.1
A_84_P839837		4.47059	4.0868	aspartyl protease family protein [AT3G51360.1]	NP174132	AT3G51360.1
A_84_P521818		3.96349	3.83818	aspartyl protease family protein [AT3G51360.1]		AT3G51360.1
A_84_P75354		-1.43934		similar to unnamed protein product [Vitis vinifera] (GB:CAO14460.1) [AT3G51510.1]	TC293669	AT3G51510.1
A_84_P13713		1.04637		macrophage migration inhibitory factor family protein / MIF family protein [AT3G51660.1]	NP163755	AT3G51660.1
A_84_P285270		-1.21034		unknown protein [AT3G51750.1]	TC301358	AT3G51750.1
A_84_P758797		-1.00572		unknown protein [AT3G51760.1]	NP042164	AT3G51760.1
A_84_P15656			-1.08296	ATG4/CHLG/G4 (CHLOROPHYLL SYNTHASE); chlorophyll synthetase [AT3G51820.1]	TC287941	AT3G51820.1
A_84_P23171		1.93936	1.48896	AT-HSFA7A (Arabidopsis thaliana heat shock transcription factor A7A); DNA binding / transcription factor [AT3G51910.1]	TC306175	AT3G51910.1
A_84_P10878		-1.63965		transducin family protein / WD-40 repeat family protein [AT3G51930.1]	TC287460	AT3G51930.1
A_84_P819980	-1.18931			ATPTPKIS1/DSP4/SEX4 (STARCH-EXCESS 4); protein tyrosine/serine/threonine phosphatase [AT3G52180.2]	NP174175	AT3G52180.2
A_84_P12770		1.32655	1.35424	PHF1 (PHOSPHATE TRANSPORTER TRAFFIC FACILITATOR1); nucleotide binding [AT3G52190.1]	TC285731	AT3G52190.1
A_84_P785574	-1.0646			SPP2; sucrose-phosphatase [AT3G52340.1]	NP234902	AT3G52340.1
A_84_P222439		-1.58908		FLA15 (FASCICLIN-LIKE ARABINOGALACTAN PROTEIN 15 PRECURSOR) [AT3G52370.1]	TC298307	AT3G52370.1
A_84_P19389		2.27937	2.13079	U-box domain-containing protein [AT3G52450.1]	TC300013	AT3G52450.1
A_84_P826034		2.15864	2.03643	U-box domain-containing protein [AT3G52450.1]	TC300013	AT3G52450.1
A_84_P21281		1.366		harpin-induced family protein / HIN1 family protein / harpin-responsive family protein [AT3G52470.1]	TC291270	AT3G52470.1
A_84_P509388		1.00972		similar to unknown protein [Arabidopsis thaliana] (TAIR:AT5G06280.3); similar to unknown protein [Arabidopsis thaliana] (TAIR:AT5G06280.1) [AT3G52520.1]	TC305951	AT3G52520.1
A_84_P228559		1.19541		ATOFP18/OFP18 (Arabidopsis thaliana ovate family protein 18) [AT3G52540.1]	TC288258	AT3G52540.1
A_84_P761052		-2.39297		carbonic anhydrase family protein [AT3G52720.2]	TC298947	AT3G52720.2
A_84_P19392	-2.16742	-2.15175		late embryogenesis abundant protein, putative / LEA protein, putative [AT3G53040.1]	TC285269	AT3G53040.1
A_84_P13719		2.38034		UGT73D1 (UDP-GLUCOSYL TRANSFERASE 73D1); UDP-glycosyltransferase [AT3G53150.1]	NP184309	AT3G53150.1
A_84_P10884		1.27677		PAL2 (phenylalanine ammonia-lyase 2); phenylalanine ammonia-lyase [AT3G53260.1]	TC296446	AT3G53260.1
A_84_P24124		-1.24457		PIP2A (PLASMA MEMBRANE INTRINSIC PROTEIN 2A); water channel [AT3G53420.1]	TC297110	AT3G53420.1
A_84_P809159		-1.28851		PIP2A (PLASMA MEMBRANE INTRINSIC PROTEIN 2A) [AT3G53420.2]	TC297110	AT3G53420.2
A_84_P809147		-1.0328		PIP2A (PLASMA MEMBRANE INTRINSIC PROTEIN 2A) [AT3G53420.2]	TC307437	AT3G53420.2
A_84_P809145		-1.08394		PIP2A (PLASMA MEMBRANE INTRINSIC PROTEIN 2A) [AT3G53420.2]	TC307437	AT3G53420.2
A_84_P853245		-1.011		PIP2A (PLASMA MEMBRANE INTRINSIC PROTEIN 2A) [AT3G53420.2]	TC308254	AT3G53420.2
A_84_P858176		-1.25369		PIP2A (PLASMA MEMBRANE INTRINSIC PROTEIN 2A) [AT3G53420.2]	TC311451	AT3G53420.2
A_84_P14666		2.73653		ATPDR9/PDR9 (PLEIOTROPIC DRUG RESISTANCE 9); ATPase, coupled to transmembrane movement of substances [AT3G53480.1]	TC292996	AT3G53480.1
A_84_P22233		1.50609		leucine-rich repeat transmembrane protein kinase, putative [AT3G53590.1]	NP166460	AT3G53590.1
A_84_P16558			1.25452	ATCHX20 (CATION/H+ EXCHANGER 20); monovalent cation:proton antiporter [AT3G53720.1]	TC281115	AT3G53720.1
A_84_P21289		1.01573		mitochondrial substrate carrier family protein [AT3G53940.1]	NP209187	AT3G53940.1
A_84_P13724		-1.56143		fructose-1,6-bisphosphatase, putative / D-fructose-1,6-bisphosphate 1-phosphohydrolase, putative / FBPase, putative [AT3G54050.1]	TC285946	AT3G54050.1
A_84_P813598		-1.54203		fructose-1,6-bisphosphatase, putative / D-fructose-1,6-bisphosphate 1-phosphohydrolase, putative / FBPase, putative [AT3G54050.1]	TC308053	AT3G54050.1
A_84_P21290		1.16496		reticulon family protein (RTNLB12) [AT3G54120.1]		AT3G54120.1
A_84_P24128		1.31539		embryo-abundant protein-related [AT3G54150.1]	TC288392	AT3G54150.1
A_84_P152088	-1.08262	-1.4295		transcription factor [AT3G54390.1]	TC286485	AT3G54390.1
A_84_P593776		1.92936		similar to unknown protein [Arabidopsis thaliana] (TAIR:AT1G70040.1); contains InterPro domain Protein of unknown function DUF1163 (InterPro:IPR009544) [AT3G54410.1]	TC309517	AT3G54410.1
A_84_P13726		2.03751		ATEP3 (Arabidopsis thaliana chitinase class IV); chitinase [AT3G54420.1]	TC292358	AT3G54420.1
A_84_P549304		2.40978		similar to unknown protein [Arabidopsis thaliana] (TAIR:AT3G54520.1) [AT3G54530.1]	NP214059	AT3G54530.1
A_84_P188054	1.31754	1.6197		TSA1 (TRYPTOPHAN SYNTHASE ALPHA CHAIN); tryptophan synthase [AT3G54640.1]	TC290859	AT3G54640.1
A_84_P522715	-1.42215	-1.58866		amino acid transporter family protein [AT3G54830.1]		AT3G54830.1
A_84_P19401		1.97434		similar to unknown protein [Arabidopsis thaliana] (TAIR:AT5G25360.1); similar to unnamed protein product [Vitis vinifera] (GB:CAO68874.1) [AT3G54880.1]	TC308183	AT3G54880.1
A_84_P817510	-1.8151			PMR6 (POWDERY MILDEW RESISTANT 6); lyase/ pectate lyase [AT3G54920.1]	TC310787	AT3G54920.1
A_84_P12784		4.21559	3.69109	ATEXO70H1 (exocyst subunit EXO70 family protein H1); protein binding [AT3G55150.1]	TC282474	AT3G55150.1
A_84_P12785		-1.13561		PPL1 (PSBP-LIKE PROTEIN 1); calcium ion binding [AT3G55330.1]	TC292100	AT3G55330.1
A_84_P13730		1.14224		RNA recognition motif (RRM)-containing protein [AT3G55340.1]	TC282170	AT3G55340.1
A_84_P17513		-1.05797		regulator of chromosome condensation (RCC1) family protein [AT3G55580.1]	TC297761	AT3G55580.1
A_84_P760385	-1.01595			P5CS2 (DELTA 1-PYRROLINE-5-CARBOXYLATE SYNTHASE 2); catalytic/ glutamate 5-kinase/ glutamate-5-semialdehyde dehydrogenase/ oxidoreductase [AT3G55610.1]	TC296742	AT3G55610.1
A_84_P19405	-1.04614			P5CS2 (DELTA 1-PYRROLINE-5-CARBOXYLATE SYNTHASE 2); catalytic/ glutamate 5-kinase/ glutamate-5-semialdehyde dehydrogenase/ oxidoreductase [AT3G55610.1]	TC296742	AT3G55610.1
A_84_P761076		-1.00567		similar to unknown protein [Arabidopsis thaliana] (TAIR:AT2G39855.2) [AT3G55646.1]		AT3G55646.1
A_84_P24135	-1.5404			UDP-glucoronosyl/UDP-glucosyl transferase family protein [AT3G55710.1]	TC307538	AT3G55710.1
A_84_P242693		4.05196	3.73891	unknown protein [AT3G55790.1]	NP209544	AT3G55790.1
A_84_P813537		-1.34802		SBPASE (SEDOHEPTULOSE-BISPHOSPHATASE); phosphoric ester hydrolase/ sedoheptulose-bisphosphatase [AT3G55800.1]	TC302586	AT3G55800.1
A_84_P14677		-1.36507		SBPASE (SEDOHEPTULOSE-BISPHOSPHATASE); phosphoric ester hydrolase/ sedoheptulose-bisphosphatase [AT3G55800.1]	TC302586	AT3G55800.1
A_84_P18460	1.26108	1.08916		anthranilate synthase, alpha subunit, putative [AT3G55870.1]	NP207761	AT3G55870.1
A_84_P24136		-1.40205		phosphoinositide-specific phospholipase C, putative [AT3G55940.1]	NP207768	AT3G55940.1
A_84_P12788	1.05057			oxidoreductase, 2OG-Fe(II) oxygenase family protein [AT3G55970.1]	TC289178	AT3G55970.1
A_84_P20353		-1.22876		dehydration-responsive protein-related [AT3G56080.1]	TC302484	AT3G56080.1
A_84_P849984		-1.05061		dehydration-responsive protein-related [AT3G56080.1]	TC304191	AT3G56080.1
A_84_P21299		1.56377		ATFER3 (FERRITIN 3); ferric iron binding [AT3G56090.1]	NP424365	AT3G56090.1
A_84_P14679			1.36333	amino acid transporter family protein [AT3G56200.1]	TC286809	AT3G56200.1
A_84_P856333	1.01699			amino acid transporter family protein [AT3G56200.1]	TC310426	AT3G56200.1
A_84_P789317		-2.92981		pseudogene of unknown protein [AT3G56275.1]	TC295589	AT3G56275.1
A_84_P760622		-3.06032		pseudogene of unknown protein [AT3G56275.1]	TC295589	AT3G56275.1
A_84_P535125	-1.99066			RNA splicing factor-related [AT3G56790.1]	NP228517	AT3G56790.1
A_84_P17519		-1.58099		ARR9 (RESPONSE REACTOR 4); transcription regulator [AT3G57040.1]	TC289820	AT3G57040.1
A_84_P21304			2.193	protease inhibitor/seed storage/lipid transfer protein (LTP) family protein [AT3G57310.1]	NP174196	AT3G57310.1
A_84_P16575		1.03684		40S ribosomal protein S2 (RPS2D) [AT3G57490.1]	TC289630	AT3G57490.1
A_84_P18467		1.53949		ATSIP2 (ARABIDOPSIS THALIANA SEED IMBIBITION 2); hydrolase, hydrolyzing O-glycosyl compounds [AT3G57520.1]	TC303243	AT3G57520.1
A_84_P806643		1.56473		ATSIP2 (ARABIDOPSIS THALIANA SEED IMBIBITION 2); hydrolase, hydrolyzing O-glycosyl compounds [AT3G57520.2]	TC302295	AT3G57520.2
A_84_P20359		-1.11369		remorin family protein [AT3G57540.1]	TC290535	AT3G57540.1
A_84_P19414		-1.04344		peptidase S41 family protein [AT3G57680.1]	TC299489	AT3G57680.1
A_84_P17522		1.70702	1.4133	protein kinase, putative [AT3G57700.1]		AT3G57700.1
A_84_P23201		-1.11035		zinc finger (C3HC4-type RING finger) family protein [AT3G58720.1]		AT3G58720.1
A_84_P18472	-1.1159			F-box family protein [AT3G58820.1]	NP209054	AT3G58820.1
A_84_P137439	-1.1125			PAR2 (PHY RAPIDLY REGULATED 2); transcription regulator [AT3G58850.1]	TC306166	AT3G58850.1
A_84_P610685		1.09638		similar to unknown protein [Arabidopsis thaliana] (TAIR:AT4G37440.2); similar to unknown protein [Arabidopsis thaliana] (TAIR:AT4G37440.1); similar to unnamed protein product [Vitis vinifera] (GB:CAO46283.1) [AT3G59670.1]	TC284709	AT3G59670.1
A_84_P828302	-1.36743			similar to hypothetical protein [Vitis vinifera] (GB:CAN69676.1) [AT3G59680.1]	TC308514	AT3G59680.1
A_84_P759045		1.0309	1.06551	similar to unknown protein [Arabidopsis thaliana] (TAIR:AT2G44010.1) [AT3G59880.1]	NP1421692	AT3G59880.1
A_84_P20369		2.44164		DIN2 (DARK INDUCIBLE 2); hydrolase, hydrolyzing O-glycosyl compounds [AT3G60140.1]	TC289082	AT3G60140.1
A_84_P847302		2.65439		DIN2 (DARK INDUCIBLE 2); hydrolase, hydrolyzing O-glycosyl compounds [AT3G60140.1]	TC299107	AT3G60140.1
A_84_P10914	-1.15327			ATL4 (Arabidopsis T?xicos en Levadura 4); protein binding / zinc ion binding [AT3G60220.1]	TC290099	AT3G60220.1
A_84_P15640	-1.10029			oxidoreductase, acting on paired donors, with incorporation or reduction of molecular oxygen, 2-oxoglutarate as one donor, and incorporation of one atom each of oxygen into both donors [AT3G60290.1]	TC311025	AT3G60290.1
A_84_P833436		1.23957		mitochondrial transcription termination factor-related / mTERF-related [AT3G60400.1]	TC293930	AT3G60400.1
A_84_P17533		1.02079		sec61beta family protein [AT3G60540.1]	TC305607	AT3G60540.1
A_84_P760728		-1.15312		similar to unknown protein [Arabidopsis thaliana] (TAIR:AT5G48190.1); similar to unknown [Populus trichocarpa] (GB:ABK94817.1); contains InterPro domain Protein of unknown function DUF23 (InterPro:IPR008166) [AT3G60990.1]	TC309841	AT3G60990.1
A_84_P14698		-1.30011		fructosamine kinase family protein [AT3G61080.1]	NP281386	AT3G61080.1
A_84_P565260		2.24663		U-box domain-containing protein [AT3G61390.1]	TC286845	AT3G61390.1
A_84_P762264		1.72789		unknown protein [AT3G61571.1]		AT3G61571.1
A_84_P588433		-1.54042		auxin-responsive protein -related [AT3G61750.1]	TC303463	AT3G61750.1
A_84_P589324	-1.63657			similar to unknown protein [Arabidopsis thaliana] (TAIR:AT2G46535.1) [AT3G61840.1]	TC296365	AT3G61840.1
A_84_P12811		-1.3063		similar to unknown [Populus trichocarpa] (GB:ABK95718.1) [AT3G61870.1]	TC298503	AT3G61870.1
A_84_P827123	2.36501	1.80911		unknown protein [AT3G61930.1]	TC300947	AT3G61930.1
A_84_P54570	2.3034	1.82919		unknown protein [AT3G61930.1]	TC300947	AT3G61930.1
A_84_P14702		-1.91769		IAA30 (indoleacetic acid-induced protein 30); transcription factor [AT3G62100.1]	TC298471	AT3G62100.1
A_84_P13758		1.10983		carboxylesterase [AT3G62280.1]	NP174523	AT3G62280.1
A_84_P80789	-1.5136	-1.55252		nucleic acid binding [AT3G62320.1]	NP965351	AT3G62320.1
A_84_P557300		-2.01878		similar to S locus F-box-related / SLF-related [Arabidopsis thaliana] (TAIR:AT1G71320.1); similar to F-box domain containing protein [Brassica oleracea] (GB:ABD65166.1); contains InterPro domain F-box associated type 1 (InterPro:IPR006527) [AT3G62380.1]	TC290378	AT3G62380.1
A_84_P860907		1.28462		ATBZIP53 (BASIC REGION/LEUCINE ZIPPER MOTIF 53); DNA binding / protein heterodimerization/ sequence-specific DNA binding / transcription factor [AT3G62420.1]	TC313102	AT3G62420.1
A_84_P526266	-1.16001			F-box family protein [AT3G62430.1]	NP206628	AT3G62430.1
A_84_P10923		-1.07109		universal stress protein (USP) family protein [AT3G62550.1]	TC307226	AT3G62550.1
A_84_P16595		-1.11439		GATL7 (Galacturonosyltransferase-like 7); polygalacturonate 4-alpha-galacturonosyltransferase/ transferase, transferring glycosyl groups / transferase, transferring hexosyl groups [AT3G62660.1]	TC301439	AT3G62660.1
A_84_P20379		-1.90852		ATL5 (Arabidopsis T?xicos en Levadura 5); protein binding / zinc ion binding [AT3G62690.1]	TC292741	AT3G62690.1
A_84_P758943		-1.10481		hydrolase, hydrolyzing O-glycosyl compounds [AT3G62750.1]	TC306279	AT3G62750.1
A_84_P790750		-1.8941		similar to unknown protein [Arabidopsis thaliana] (TAIR:AT2G47950.1) [AT3G62990.1]	NP207817	AT3G62990.1
A_84_P840120		-2.06284		similar to unknown protein [Arabidopsis thaliana] (TAIR:AT2G47950.1) [AT3G62990.1]	NP207817	AT3G62990.1
A_84_P137739	-1.58659	-1.32816		EDL3 (EID1-LIKE 3) [AT3G63060.1]	TC292409	AT3G63060.1
A_84_P23219		-1.12072		CYCP1;1 (cyclin p1;1); cyclin-dependent protein kinase [AT3G63120.1]	TC290471	AT3G63120.1
A_84_P536931	-1.48749			RNA binding [AT3G63450.1]	NP953907	AT3G63450.1
A_84_P10931		-1.27609		UNE10 (unfertilized embryo sac 10); DNA binding / transcription factor [AT4G00050.1]	TC290247	AT4G00050.1
A_84_P17549	1.76897	1.89401	1.79513	protease inhibitor/seed storage/lipid transfer protein (LTP) family protein [AT4G00165.1]	TC287970	AT4G00165.1
A_84_P850398			1.12351	CYP86A2 (ABERRANT INDUCTION OF TYPE THREE GENES 1); oxygen binding [AT4G00360.1]	TC304951	AT4G00360.1
A_84_P83059		-1.00938		similar to unknown protein [Arabidopsis thaliana] (TAIR:AT2G45900.1); similar to unnamed protein product [Vitis vinifera] (GB:CAO39618.1); contains domain PTHR21726:SF4 (PTHR21726:SF4); contains domain PTHR21726 (PTHR21726) [AT4G00440.1]	TC307377	AT4G00440.1
A_84_P17551		-1.22345		auxin-responsive family protein [AT4G00880.1]	TC301183	AT4G00880.1
A_84_P764077		-1.48546		ETC3 (ENHANCER OF TRY AND CPC 3); DNA binding / transcription factor [AT4G01060.1]	TC309072	AT4G01060.1
A_84_P532498		-1.50836		ETC3 (ENHANCER OF TRY AND CPC 3); DNA binding / transcription factor [AT4G01060.1]	TC311820	AT4G01060.1
A_84_P804789		-1.24241		Identical to Uncharacterized protein At4g01150, chloroplast precursor [Arabidopsis Thaliana] (GB:O04616;GB:Q38835); similar to unknown protein [Arabidopsis thaliana] (TAIR:AT4G38100.1); similar to unknown [Populus trichocarpa] (GB:ABK95729.1) [AT4G01150.1]	TC303700	AT4G01150.1
A_84_P233869		-1.32574		Identical to Uncharacterized protein At4g01150, chloroplast precursor [Arabidopsis Thaliana] (GB:O04616;GB:Q38835); similar to unknown protein [Arabidopsis thaliana] (TAIR:AT4G38100.1); similar to unknown [Populus trichocarpa] (GB:ABK95729.1) [AT4G01150.1]	TC303700	AT4G01150.1
A_84_P16606		1.86635		WRKY22 (WRKY DNA-binding protein 22); transcription factor [AT4G01250.1]	TC290997	AT4G01250.1
A_84_P10935		-1.53479		plastocyanin-like domain-containing protein [AT4G01380.1]	NP043869	AT4G01380.1
A_84_P201218		-1.12966		serine protease inhibitor, Kazal-type family protein [AT4G01575.1]	TC293938	AT4G01575.1
A_84_P18500		1.54849		chitinase, putative [AT4G01700.1]		AT4G01700.1
A_84_P861430		1.51707		tolB protein-related [AT4G01870.1]	TC313391	AT4G01870.1
A_84_P18503			1.18028	pectinesterase family protein [AT4G02300.1]	TC284165	AT4G02300.1
A_84_P266040	-1.17173			lectin protein kinase, putative [AT4G02420.1]	TC282230	AT4G02420.1
A_84_P23234		-1.22232		protein kinase family protein [AT4G02630.1]	TC284929	AT4G02630.1
A_84_P12832	-2.27435	-2.08788		ATIDD12 (ARABIDOPSIS THALIANA INDETERMINATE(ID)-DOMAIN 12); nucleic acid binding / transcription factor/ zinc ion binding [AT4G02670.1]	TC287877	AT4G02670.1
A_84_P18506			-1.24167	rac GTPase activating protein, putative [AT4G03100.1]	TC285193	AT4G03100.1
A_84_P14724		-1.084		PETC (PHOTOSYNTHETIC ELECTRON TRANSFER C) [AT4G03280.1]	TC313870	AT4G03280.1
A_84_P859892		-1.01442		PETC (PHOTOSYNTHETIC ELECTRON TRANSFER C) [AT4G03280.2]	TC312463	AT4G03280.2
A_84_P559973		3.02702	3.58262	ankyrin repeat family protein [AT4G03460.1]	TC282583	AT4G03460.1
A_84_P14725		-1.17778		phosphonate metabolism protein-related [AT4G03610.1]	TC291682	AT4G03610.1
A_84_P191234			1.07591	tyrosine specific protein phosphatase family protein [AT4G03960.1]	TC293569	AT4G03960.1
A_84_P259930		-1.23506		early-responsive to dehydration protein-related / ERD protein-related [AT4G04340.1]	TC305692	AT4G04340.1
A_84_P591139	-1.04368			pentatricopeptide (PPR) repeat-containing protein [AT4G04370.1]	TC281762	AT4G04370.1
A_84_P119962		2.01407		protein kinase family protein [AT4G04540.1]	TC282322	AT4G04540.1
A_84_P297434		-1.02271		ATPC1 (ATP synthase gamma chain 1) [AT4G04640.1]	TC285858	AT4G04640.1
A_84_P764121	1.40092	1.34534		transposable element gene [AT4G04655.1]		AT4G04655.1
A_84_P838530		-1.42981		inositol monophosphatase family protein [AT4G05090.1]	NP033484	AT4G05090.1
A_84_P17568		1.61449		ATRFNR1 (ROOT FNR 1); oxidoreductase [AT4G05390.1]	TC301756	AT4G05390.1
A_84_P584912		-1.72173		similar to unnamed protein product [Vitis vinifera] (GB:CAO61385.1); contains InterPro domain B302, (SPRY)-like (InterPro:IPR001870) [AT4G06536.1]		AT4G06536.1
A_84_P800117		-2.0088		similar to unnamed protein product [Vitis vinifera] (GB:CAO61385.1); contains InterPro domain B302, (SPRY)-like (InterPro:IPR001870) [AT4G06536.1]		AT4G06536.1
A_84_P763175			2.71426	transposable element gene [AT4G06612.1]		AT4G06612.1
A_84_P789539		1.27838		RAP2.9 (related to AP2 9); transcription factor [AT4G06746.1]	TC302204	AT4G06746.1
A_84_P530732		1.24091		RAP2.9 (related to AP2 9); transcription factor [AT4G06746.1]	TC302204	AT4G06746.1
A_84_P12842		2.13897		KNAT1 (BREVIPEDICELLUS 1); transcription factor [AT4G08150.1]	TC303477	AT4G08150.1
A_84_P845323		1.13077		inositol 1,3,4-trisphosphate 5/6-kinase family protein [AT4G08170.2]	TC289973	AT4G08170.2
A_84_P15679		1.33764		SAPX; L-ascorbate peroxidase [AT4G08390.1]	TC286103	AT4G08390.1
A_84_P857254		1.39811		SAPX; L-ascorbate peroxidase [AT4G08390.2]	TC310918	AT4G08390.2
A_84_P16626		2.34652		peroxidase, putative [AT4G08770.1]	TC288411	AT4G08770.1
A_84_P763091		-1.04436		arginase, putative [AT4G08870.1]	TC307853	AT4G08870.1
A_84_P12846		2.13142		zinc finger (C3HC4-type RING finger) family protein [AT4G09100.1]	TC305459	AT4G09100.1
A_84_P13791		3.80257		zinc finger (C3HC4-type RING finger) family protein [AT4G09110.1]	NP190175	AT4G09110.1
A_84_P14736		2.58234		zinc finger (C3HC4-type RING finger) family protein [AT4G09120.1]	NP190176	AT4G09120.1
A_84_P15682		2.62454		zinc finger (C3HC4-type RING finger) family protein [AT4G09130.1]	NP190177	AT4G09130.1
A_84_P831286	-1.51023			SEC14 cytosolic factor family protein / phosphoglyceride transfer family protein [AT4G09160.1]	TC302981	AT4G09160.1
A_84_P10011		-1.55667		DNAJ heat shock N-terminal domain-containing protein [AT4G09350.1]	TC293400	AT4G09350.1
A_84_P10012		-3.32939		GASA3 (GAST1 PROTEIN HOMOLOG 3) [AT4G09600.1]	TC297226	AT4G09600.1
A_84_P21361		-1.47935		ATSPS4F; sucrose-phosphate synthase/ transferase, transferring glycosyl groups [AT4G10120.1]	TC280507	AT4G10120.1
A_84_P23253		-1.30402		zinc finger (C3HC4-type RING finger) family protein [AT4G10150.1]	TC294026	AT4G10150.1
A_84_P235043		-2.14149		HKT1 (HIGH-AFFINITY K+ TRANSPORTER 1); sodium ion transmembrane transporter [AT4G10310.1]	NP040414	AT4G10310.1
A_84_P827060		-2.22146		HKT1 (HIGH-AFFINITY K+ TRANSPORTER 1); sodium ion transmembrane transporter [AT4G10310.1]	NP040414	AT4G10310.1
A_84_P19470		-1.11734		LHCB5 (LIGHT HARVESTING COMPLEX OF PHOTOSYSTEM II 5); chlorophyll binding [AT4G10340.1]	TC313559	AT4G10340.1
A_84_P12851		2.4822		oxidoreductase, 2OG-Fe(II) oxygenase family protein [AT4G10500.1]	TC287934	AT4G10500.1
A_84_P765876		2.85277		other RNA [AT4G10507.1]		AT4G10507.1
A_84_P576883	-1.01897			ankyrin repeat family protein [AT4G11000.1]	NP040820	AT4G11000.1
A_84_P21365		1.51552		CRF1 (CYTOKININ RESPONSE FACTOR 1); DNA binding / transcription factor [AT4G11140.1]	TC291791	AT4G11140.1
A_84_P185874		1.78289		disease resistance protein (TIR-NBS-LRR class), putative [AT4G11170.1]	NP040680	AT4G11170.1
A_84_P23258		1.06585		RHA1A (RING-H2 finger A1A); protein binding / zinc ion binding [AT4G11370.1]	TC300810	AT4G11370.1
A_84_P16637		1.33596		protein kinase family protein [AT4G11470.1]	TC282254	AT4G11470.1
A_84_P764356		2.13541		pseudogene, similar to putative receptor-like serine-threonine protein kinase, blastp match of 59% identity and 6.5e-66 P-value to GP [AT4G11500.1]	TC293872	AT4G11500.1
A_84_P821803	-1.06729			similar to unknown protein [Arabidopsis thaliana] (TAIR:AT4G22850.1); similar to unnamed protein product [Vitis vinifera] (GB:CAO63604.1); contains InterPro domain SNARE associated Golgi protein (InterPro:IPR015414) [AT4G12000.1]	TC306036	AT4G12000.1
A_84_P243025	-1.11959			similar to unknown protein [Arabidopsis thaliana] (TAIR:AT4G22850.1); similar to unnamed protein product [Vitis vinifera] (GB:CAO63604.1); contains InterPro domain SNARE associated Golgi protein (InterPro:IPR015414) [AT4G12000.1]	TC306036	AT4G12000.1
A_84_P581339		-1.26127		unknown protein [AT4G12005.1]	TC305681	AT4G12005.1
A_84_P11914		1.44901		stress-inducible protein, putative [AT4G12400.1]	TC297656	AT4G12400.1
A_84_P826776		1.39263		stress-inducible protein, putative [AT4G12400.2]	TC283640	AT4G12400.2
A_84_P12859	-1.59734	-1.65679		auxin-responsive family protein [AT4G12410.1]	TC301118	AT4G12410.1
A_84_P20425	2.95911	2.94817	2.55063	pEARLI 1; lipid binding [AT4G12480.1]	TC292635	AT4G12480.1
A_84_P156615	3.24894	2.82234	2.78147	protease inhibitor/seed storage/lipid transfer protein (LTP) family protein [AT4G12490.1]	TC295694	AT4G12490.1
A_84_P103016	3.10862	2.98185	2.9862	protease inhibitor/seed storage/lipid transfer protein (LTP) family protein [AT4G12500.1]	TC296660	AT4G12500.1
A_84_P22318		-2.35702		hydrolase, alpha/beta fold family protein [AT4G12830.1]	TC290636	AT4G12830.1
A_84_P765116		-1.12508		other RNA [AT4G12917.1]		AT4G12917.1
A_84_P13809	1.61376			pinoresinol-lariciresinol reductase, putative [AT4G13660.1]	TC290298	AT4G13660.1
A_84_P19577		1.11347		SHM4 (SERINE HYDROXYMETHYLTRANSFERASE 4); glycine hydroxymethyltransferase [AT4G13930.1]	TC283492	AT4G13930.1
A_84_P56910	-1.76948			zinc finger (AN1-like) family protein [AT4G14225.1]		AT4G14225.1
A_84_P13904	-1.98614			disease resistance protein (TIR-NBS-LRR class), putative [AT4G14370.1]	TC280221	AT4G14370.1
A_84_P18633		1.10042		enoyl-CoA hydratase/isomerase family protein [AT4G14440.1]	TC303050	AT4G14440.1
A_84_P596516		1.26872		Identical to Uncharacterized protein At4g14450, chloroplast precursor [Arabidopsis Thaliana] (GB:Q6NN02); similar to unknown protein [Arabidopsis thaliana] (TAIR:AT3G23170.1); similar to hypothetical protein [Vitis vinifera] (GB:CAN71216.1) [AT4G14450.1]	TC306974	AT4G14450.1
A_84_P515691		1.02411		EMB2739 (EMBRYO DEFECTIVE 2739) [AT4G14590.1]	TC284776	AT4G14590.1
A_84_P12960			1.99485	GLP9 (GERMIN-LIKE PROTEIN 9); manganese ion binding / metal ion binding / nutrient reservoir [AT4G14630.1]	TC292902	AT4G14630.1
A_84_P62840	-1.45551	-1.63134	-1.31605	ELIP2 (EARLY LIGHT-INDUCIBLE PROTEIN 2); chlorophyll binding [AT4G14690.1]	TC305133	AT4G14690.1
A_84_P268070		1.51487		DC1 domain-containing protein [AT4G15070.1]	TC280944	AT4G15070.1
A_84_P255420		1.78909	1.97888	ATP binding / ATPase/ nucleoside-triphosphatase/ nucleotide binding [AT4G15233.1]		AT4G15233.1
A_84_P94319		1.62166	1.84538	ABC transporter family protein [AT4G15236.1]		AT4G15236.1
A_84_P12017		2.39618		glucosyltransferase-related [AT4G15270.1]	TC290906	AT4G15270.1
A_84_P12962	1.24565	1.87905		UDP-glucoronosyl/UDP-glucosyl transferase family protein [AT4G15280.1]	TC285589	AT4G15280.1
A_84_P23366		3.19071	3.25043	transferase family protein [AT4G15400.1]	TC286820	AT4G15400.1
A_84_P289314		2.33949	2.60463	ribonuclease III family protein [AT4G15417.1]		AT4G15417.1
A_84_P787591		-1.04662		senescence/dehydration-associated protein-related [AT4G15450.1]	TC288882	AT4G15450.1
A_84_P17691		1.05504		PPDK (PYRUVATE ORTHOPHOSPHATE DIKINASE); kinase/ pyruvate, phosphate dikinase [AT4G15530.1]	TC293060	AT4G15530.1
A_84_P815208		1.44219		PPDK (PYRUVATE ORTHOPHOSPHATE DIKINASE); kinase/ pyruvate, phosphate dikinase [AT4G15530.3]	TC293060	AT4G15530.3
A_84_P851390		1.46057		PPDK (PYRUVATE ORTHOPHOSPHATE DIKINASE); kinase/ pyruvate, phosphate dikinase [AT4G15530.3]	TC306310	AT4G15530.3
A_84_P817440	1.60913	1.83886		integral membrane family protein [AT4G15610.1]	TC292015	AT4G15610.1
A_84_P284990	1.44837	1.75787		integral membrane family protein [AT4G15610.1]	TC292015	AT4G15610.1
A_84_P129356			-1.12821	similar to unknown protein [Arabidopsis lyrata] (GB:AAN46277.1); contains domain PTHR21297 (PTHR21297) [AT4G15950.1]	TC300672	AT4G15950.1
A_84_P558224		-1.98122		similar to unknown protein [Arabidopsis thaliana] (TAIR:AT4G16024.1) [AT4G15990.1]	TC304860	AT4G15990.1
A_84_P223589		-1.25247		similar to unknown protein [Arabidopsis thaliana] (TAIR:AT4G15990.1) [AT4G16000.1]	TC297626	AT4G16000.1
A_84_P765533		-1.24442		unknown protein [AT4G16008.1]	TC294541	AT4G16008.1
A_84_P204788		1.01383		similar to zinc finger (GATA type) family protein [Arabidopsis thaliana] (TAIR:AT3G16870.1); contains domain Glucocorticoid receptor-like (DNA-binding domain) (SSF57716) [AT4G16141.1]	TC295807	AT4G16141.1
A_84_P17693		1.82175		glycosyl hydrolase family 17 protein [AT4G16260.1]	TC298281	AT4G16260.1
A_84_P867721		1.72923		glycosyl hydrolase family 17 protein [AT4G16260.1]	TC300036	AT4G16260.1
A_84_P814311		1.66944		glycosyl hydrolase family 17 protein [AT4G16260.1]	TC300036	AT4G16260.1
A_84_P607185		2.26111		CBL6 (CALCINEURIN B-LIKE PROTEIN 6) [AT4G16350.1]	TC302812	AT4G16350.1
A_84_P765537		2.52299	2.6121	other RNA [AT4G16355.1]	TC297169	AT4G16355.1
A_84_P576905		-2.00274		unknown protein [AT4G16515.1]	TC299414	AT4G16515.1
A_84_P20532	-1.08155	-1.097		integral membrane family protein / nodulin MtN21-related [AT4G16620.1]	TC283198	AT4G16620.1
A_84_P23370		1.22496	1.24189	RNA helicase, putative [AT4G16680.1]	TC309669	AT4G16680.1
A_84_P16749		-1.47513		ATHB-2 (ARABIDOPSIS THALIANA HOMEOBOX PROTEIN 2); DNA binding / transcription factor [AT4G16780.1]	TC305676	AT4G16780.1
A_84_P19588		-1.93145		ATEXLB1 (ARABIDOPSIS THALIANA EXPANSIN-LIKE B1) [AT4G17030.1]	TC292930	AT4G17030.1
A_84_P825792		-2.03963		ATEXLB1 (ARABIDOPSIS THALIANA EXPANSIN-LIKE B1) [AT4G17030.1]	TC312424	AT4G17030.1
A_84_P17697		-1.04373		formyltetrahydrofolate deformylase, putative [AT4G17360.1]	TC291486	AT4G17360.1
A_84_P835680	-1.15428	-1.0044		transporter-related [AT4G17550.1]	TC284108	AT4G17550.1
A_84_P764796		2.07009		Encodes a defensin-like (DEFL) family protein. [AT4G17718.1]		AT4G17718.1
A_84_P74934		2.70416		DNA-binding protein-related [AT4G17800.1]	TC301861	AT4G17800.1
A_84_P10030		-1.60922		ANAC071 (Arabidopsis NAC domain containing protein 71); transcription factor [AT4G17980.1]	TC292843	AT4G17980.1
A_84_P10977	-1.12425			ATTRANS11 (Arabidopsis thaliana translocase 11); catalytic [AT4G18270.1]	NP189147	AT4G18270.1
A_84_P21379		2.90483		AtRABA1e (Arabidopsis Rab GTPase homolog A1e); GTP binding [AT4G18430.1]	TC295206	AT4G18430.1
A_84_P813900	-1.25369			proline-rich family protein [AT4G18570.1]	TC282584	AT4G18570.1
A_84_P102716	2.09214			similar to unknown protein [Arabidopsis thaliana] (TAIR:AT5G45850.1); similar to unnamed protein product [Vitis vinifera] (GB:CAO48048.1); contains InterPro domain Protein of unknown function DUF688 (InterPro:IPR007789) [AT4G18630.1]	TC285268	AT4G18630.1
A_84_P102136		-1.15144		transcription termination factor [AT4G18740.1]	TC293309	AT4G18740.1
A_84_P832753		-1.13713		similar to unnamed protein product [Vitis vinifera] (GB:CAO48031.1) [AT4G18740.2]	TC293309	AT4G18740.2
A_84_P13814		-1.29469		binding / catalytic/ transcription repressor [AT4G18810.1]	TC282771	AT4G18810.1
A_84_P15705		-1.19073		ATOFP5/OFP5 (ARABIDOPSIS THALIANA OVATE FAMILY PROTEIN 5) [AT4G18830.1]	TC289303	AT4G18830.1
A_84_P514803	-1.0249			pentatricopeptide (PPR) repeat-containing protein [AT4G18840.1]	TC283881	AT4G18840.1
A_84_P20435		1.51625		NIP1;2/NLM2 (NOD26-like intrinsic protein 1;2); water channel [AT4G18910.1]	TC289160	AT4G18910.1
A_84_P21381		1.11632		ankyrin protein kinase, putative [AT4G18950.1]	TC287259	AT4G18950.1
A_84_P784441		1.02901		ankyrin protein kinase, putative [AT4G18950.1]	TC287259	AT4G18950.1
A_84_P23273	-2.786			GDSL-motif lipase/hydrolase family protein [AT4G18970.1]	TC282707	AT4G18970.1
A_84_P784428	1.12484			binding [AT4G19160.1]	TC286001	AT4G19160.1
A_84_P91739	1.21642			binding [AT4G19160.1]	TC290500	AT4G19160.1
A_84_P19490		-2.12393		NCED4 (NINE-CIS-EPOXYCAROTENOID DIOXYGENASE 4) [AT4G19170.1]	TC282232	AT4G19170.1
A_84_P286120		-1.48062		CYP707A1 (cytochrome P450, family 707, subfamily A, polypeptide 1); oxygen binding [AT4G19230.1]	TC282490	AT4G19230.1
A_84_P784432		-1.43692		CYP707A1 (cytochrome P450, family 707, subfamily A, polypeptide 1); oxygen binding [AT4G19230.1]	TC286161	AT4G19230.1
A_84_P11926	-1.56416			alcohol oxidase-related [AT4G19380.1]	TC282133	AT4G19380.1
A_84_P58410		1.13167		glycosyl transferase family 1 protein [AT4G19460.1]		AT4G19460.1
A_84_P19491		-1.17815		disease resistance protein (TIR-NBS-LRR class), putative [AT4G19510.1]	TC280425	AT4G19510.1
A_84_P765727	-1.67465			unknown protein [AT4G19512.1]	NP966009	AT4G19512.1
A_84_P20437		-1.13837		disease resistance protein (TIR-NBS-LRR class), putative [AT4G19530.1]	TC280422	AT4G19530.1
A_84_P22329	-1.05207			CYCT1;2; cyclin-dependent protein kinase [AT4G19560.1]	TC285685	AT4G19560.1
A_84_P10037			1.69951	hydrolase, hydrolyzing O-glycosyl compounds [AT4G19760.1]	TC289104	AT4G19760.1
A_84_P12873			1.61884	glycosyl hydrolase family 18 protein [AT4G19810.1]	TC301630	AT4G19810.1
A_84_P13818			1.60271	glycosyl hydrolase family 18 protein [AT4G19820.1]	TC289078	AT4G19820.1
A_84_P70794		1.24749		unknown protein [AT4G19980.1]		AT4G19980.1
A_84_P16656		1.88931		leucine-rich repeat transmembrane protein kinase, putative [AT4G20140.1]	TC280368	AT4G20140.1
A_84_P200434		-1.05207		similar to unknown protein [Arabidopsis thaliana] (TAIR:AT5G44670.1); similar to Os06g0328800 [Oryza sativa (japonica cultivar-group)] (GB:NP_001057533.1); similar to Os02g0712500 [Oryza sativa (japonica cultivar-group)] (GB:NP_001047907.1); similar to unknown protein [Oryza sativa (japonica cultivar-group)] (GB:BAD72474.1); contains InterPro domain Protein of unknown function DUF23 (InterPro:IPR…	TC305323	AT4G20170.1
A_84_P765231	-1.87399			similar to CTP synthase, putative / UTP--ammonia ligase, putative [Arabidopsis thaliana] (TAIR:AT1G30820.1); similar to CTP synthase, putative / UTP--ammonia ligase, putative [Arabidopsis thaliana] (TAIR:AT2G34890.1); similar to EMB2742 (EMBRYO DEFECTIVE 2742), CTP synthase [Arabidopsis thaliana] (TAIR:AT3G12670.1); similar to putative CTP synthetase [Oryza sativa (japonica cultivar-group)] (GB:B…	TC308940	AT4G20320.2
A_84_P22333		3.16821		tapetum-specific protein-related [AT4G20420.1]	TC297886	AT4G20420.1
A_84_P11931		1.83055	1.74918	NAD-dependent epimerase/dehydratase family protein [AT4G20460.1]	TC288646	AT4G20460.1
A_84_P552923		1.40974		unknown protein [AT4G20690.1]	NP229823	AT4G20690.1
A_84_P18550		1.21685		calcium-binding protein, putative [AT4G20780.1]	TC297512	AT4G20780.1
A_84_P22334		-1.72375		FAD-binding domain-containing protein [AT4G20820.1]	TC284168	AT4G20820.1
A_84_P866261	1.96744	1.97458	2.00667	FAD-binding domain-containing protein [AT4G20860.1]	NP542335	AT4G20860.1
A_84_P12877	1.89679	2.07102	1.98615	FAD-binding domain-containing protein [AT4G20860.1]	TC303990	AT4G20860.1
A_84_P808596	1.90005	1.96091	1.93167	FAD-binding domain-containing protein [AT4G20860.1]	TC307921	AT4G20860.1
A_84_P21390		-1.53932		ATGA2OX8 (GIBBERELLIN 2-OXIDASE 8); gibberellin 2-beta-dioxygenase [AT4G21200.1]	TC291564	AT4G21200.1
A_84_P763252		1.73802	1.50249	S-locus protein kinase-related [AT4G21366.1]	TC281107	AT4G21366.1
A_84_P17607		1.69885	1.42604	ARK3 (Arabidopsis Receptor Kinase 3); kinase [AT4G21380.1]	TC281044	AT4G21380.1
A_84_P20445		2.78444		protein kinase family protein [AT4G21410.1]	TC282084	AT4G21410.1
A_84_P21392		-2.48582		subtilase family protein [AT4G21650.1]	TC281836	AT4G21650.1
A_84_P125591	2.71945	3.16707		methionine sulfoxide reductase domain-containing protein / SeIR domain-containing protein [AT4G21830.1]	TC296062	AT4G21830.1
A_84_P764120		2.50507		methionine sulfoxide reductase domain-containing protein / SeIR domain-containing protein [AT4G21830.1]	TC302414	AT4G21830.1
A_84_P68884		2.52041		methionine sulfoxide reductase domain-containing protein / SelR domain-containing protein [AT4G21840.1]	TC294840	AT4G21840.1
A_84_P290004	1.77904	2.20486		methionine sulfoxide reductase domain-containing protein / SeIR domain-containing protein [AT4G21850.1]	TC295262	AT4G21850.1
A_84_P812152	1.98815	2.30707		methionine sulfoxide reductase domain-containing protein / SeIR domain-containing protein [AT4G21850.1]	TC307164	AT4G21850.1
A_84_P565337		1.53445		unknown protein [AT4G21865.1]	TC290320	AT4G21865.1
A_84_P572473		1.21817		unknown protein [AT4G21920.1]	TC306106	AT4G21920.1
A_84_P231229		-1.08737		similar to unknown protein [Arabidopsis thaliana] (TAIR:AT1G61930.1); similar to unnamed protein product [Vitis vinifera] (GB:CAO17934.1); contains InterPro domain Protein of unknown function DUF584 (InterPro:IPR007608) [AT4G21930.1]	TC295002	AT4G21930.1
A_84_P853578		-1.0594		PRXR1 (peroxidase 42); peroxidase [AT4G21960.1]	TC308506	AT4G21960.1
A_84_P857966		-1.23591		PRXR1 (peroxidase 42); peroxidase [AT4G21960.1]	TC311343	AT4G21960.1
A_84_P14772		2.7418		WRKY31 (WRKY DNA-binding protein 31); transcription factor [AT4G22070.1]	TC291591	AT4G22070.1
A_84_P18557		1.13134	1.31999	protease inhibitor/seed storage/lipid transfer protein (LTP) family protein [AT4G22470.1]	TC288635	AT4G22470.1
A_84_P12884		-1.39039		APT3 (ADENINE PHOSPHORIBOSYL TRANSFERASE 3); adenine phosphoribosyltransferase [AT4G22570.1]	TC292021	AT4G22570.1
A_84_P813506		-1.51149		APT3 (ADENINE PHOSPHORIBOSYL TRANSFERASE 3); adenine phosphoribosyltransferase [AT4G22570.1]	TC292021	AT4G22570.1
A_84_P15720		-1.00967		auxin-responsive family protein [AT4G22620.1]	TC300668	AT4G22620.1
A_84_P214638		-1.61234		PGR5-LIKE A [AT4G22890.1]	TC304126	AT4G22890.1
A_84_P526341		-1.54955		PGR5-LIKE A [AT4G22890.2]	TC289898	AT4G22890.2
A_84_P238393	-1.74192			similar to unknown protein [Arabidopsis thaliana] (TAIR:AT4G11950.1); similar to unnamed protein product [Vitis vinifera] (GB:CAO63639.1); contains InterPro domain Protein of unknown function DUF1191 (InterPro:IPR010605) [AT4G22900.1]	TC289265	AT4G22900.1
A_84_P506839		1.31108		similar to catalytic/ pyridoxal phosphate binding [Arabidopsis thaliana] (TAIR:AT5G51920.1); similar to unnamed protein product [Vitis vinifera] (GB:CAO63651.1); contains domain PTHR14237 (PTHR14237) [AT4G22980.1]	TC283616	AT4G22980.1
A_84_P20451		1.19708		ATUTR2/UTR2 (UDP-GALACTOSE TRANSPORTER 2) [AT4G23010.1]	TC304621	AT4G23010.1
A_84_P13831		1.42903		protein kinase family protein [AT4G23150.1]	TC282131	AT4G23150.1
A_84_P765683		1.32608	1.21389	pseudogene of cysteine-rich receptor-like protein kinase family protein [AT4G23215.1]	TC280908	AT4G23215.1
A_84_P21398		1.04544		protein kinase family protein [AT4G23270.1]	TC283297	AT4G23270.1
A_84_P22344		2.50979	2.37208	protein kinase, putative [AT4G23280.1]	TC282361	AT4G23280.1
A_84_P23290	1.04621			protein kinase family protein [AT4G23290.1]	TC282091	AT4G23290.1
A_84_P787501		-1.45533		TET5 (TETRASPANIN5) [AT4G23410.1]	TC294150	AT4G23410.1
A_84_P292134		-1.04881		fringe-related protein [AT4G23490.1]	TC284331	AT4G23490.1
A_84_P23291		2.47695		WRKY29 (WRKY DNA-binding protein 29); transcription factor [AT4G23550.1]	TC291157	AT4G23550.1
A_84_P869434		-1.11704		CORI3 (CORONATINE INDUCED 1, JASMONIC ACID RESPONSIVE 2); transaminase [AT4G23600.2]	TC297350	AT4G23600.2
A_84_P807753		-1.53724		major latex protein-related / MLP-related [AT4G23670.1]	TC309912	AT4G23670.1
A_84_P862797		-1.57214		major latex protein-related / MLP-related [AT4G23670.1]	TC314073	AT4G23670.1
A_84_P17616		-1.56041		major latex protein-related / MLP-related [AT4G23670.1]	TC314309	AT4G23670.1
A_84_P20454		-1.51348		disease resistance-responsive family protein / dirigent family protein [AT4G23690.1]	TC293787	AT4G23690.1
A_84_P21400		3.10476		ATCHX17 (CATION/H+ EXCHANGER 17); monovalent cation:proton antiporter [AT4G23700.1]	TC281220	AT4G23700.1
A_84_P11000		-1.57023		ATCSLG1 (Cellulose synthase-like G1); transferase/ transferase, transferring glycosyl groups [AT4G24010.1]	NP036806	AT4G24010.1
A_84_P211588	1.20208	1.2741		similar to unnamed protein product [Vitis vinifera] (GB:CAO62924.1) [AT4G24110.1]	TC293337	AT4G24110.1
A_84_P10055		1.48157	1.13581	WRKY7 (WRKY DNA-binding protein 7); transcription factor [AT4G24240.1]	TC285119	AT4G24240.1
A_84_P262840		2.95366		similar to unknown protein [Arabidopsis thaliana] (TAIR:AT3G02430.1); similar to unnamed protein product [Vitis vinifera] (GB:CAO46970.1); contains InterPro domain Protein of unknown function DUF679 (InterPro:IPR007770) [AT4G24310.1]	TC295536	AT4G24310.1
A_84_P16673	2.16663	2.05525		phosphorylase family protein [AT4G24340.1]	TC290259	AT4G24340.1
A_84_P18565	1.97889	1.59635		phosphorylase family protein [AT4G24350.1]	TC287701	AT4G24350.1
A_84_P602781	-1.03443			similar to unknown protein [Arabidopsis thaliana] (TAIR:AT5G65440.2); similar to unknown protein [Arabidopsis thaliana] (TAIR:AT5G65440.1); similar to unknown protein [Arabidopsis thaliana] (TAIR:AT5G48310.1); similar to unnamed protein product [Vitis vinifera] (GB:CAO61624.1); similar to unnamed protein product [Vitis vinifera] (GB:CAO22682.1); similar to hypothetical protein OsJ_008178 [Oryza s…	TC280439	AT4G24610.1
A_84_P513046		1.37081		ATMC2 (METACASPASE 2); caspase [AT4G25110.1]	TC284277	AT4G25110.1
A_84_P787474		1.43132		ATMC2 (METACASPASE 2); caspase [AT4G25110.1]	TC288183	AT4G25110.1
A_84_P12896	1.05566		1.41826	SHB1 (SHORT HYPOCOTYL UNDER BLUE1) [AT4G25350.1]	NP954836	AT4G25350.1
A_84_P19516	-1.37851		-1.38992	CBF2 (FREEZING TOLERANCE QTL 4); DNA binding / transcription activator/ transcription factor [AT4G25470.1]	TC295294	AT4G25470.1
A_84_P20462		-1.07872		CBF1 (C-REPEAT/DRE BINDING FACTOR 1); DNA binding / transcription activator/ transcription factor [AT4G25490.1]	TC295539	AT4G25490.1
A_84_P18571		1.1956		FIB2 (FIBRILLARIN 2) [AT4G25630.1]	TC294802	AT4G25630.1
A_84_P16680		-2.97148	-2.20529	XTR9 (XYLOGLUCAN ENDOTRANSGLYCOSYLASE 9); hydrolase, acting on glycosyl bonds [AT4G25820.1]	TC289680	AT4G25820.1
A_84_P764568	3.12663	3.9468	3.40416	unknown protein [AT4G25845.1]		AT4G25845.1
A_84_P792003		3.82167	3.38884	unknown protein [AT4G25845.1]		AT4G25845.1
A_84_P823924		-1.03736		NFU3 (NFU domain protein 3) [AT4G25910.1]	TC291289	AT4G25910.1
A_84_P22356		-1.03768		NFU3 (NFU domain protein 3) [AT4G25910.1]	TC291289	AT4G25910.1
A_84_P20466		4.32205		MIOX4 (MYO-INOSITOL OXYGENASE 4) [AT4G26260.1]	TC290725	AT4G26260.1
A_84_P11012	-1.44696			fructose-bisphosphate aldolase, cytoplasmic [AT4G26520.1]	TC289348	AT4G26520.1
A_84_P230529		-3.16124		fructose-bisphosphate aldolase, putative [AT4G26530.1]	TC308689	AT4G26530.1
A_84_P21415	1.27095			MAPKKK16 (Mitogen-activated protein kinase kinase kinase 16); kinase [AT4G26890.1]	TC286554	AT4G26890.1
A_84_P23308			-2.16567	2S seed storage protein 1 / 2S albumin storage protein / NWMU1-2S albumin 1 [AT4G27140.1]	TC298141	AT4G27140.1
A_84_P533478	-1.05508			similar to hypothetical protein [Vitis vinifera] (GB:CAN77561.1) [AT4G27510.1]	TC282143	AT4G27510.1
A_84_P579612		1.23049		similar to unknown protein [Arabidopsis thaliana] (TAIR:AT4G27657.1) [AT4G27652.1]	TC299058	AT4G27652.1
A_84_P823905		1.36179		integral membrane family protein [AT4G27860.1]	TC282633	AT4G27860.1
A_84_P172221		1.26681		integral membrane family protein [AT4G27860.1]	TC302771	AT4G27860.1
A_84_P16690		1.47242		CRF4 (CYTOKININ RESPONSE FACTOR 4); DNA binding / transcription factor [AT4G27950.1]	TC290096	AT4G27950.1
A_84_P10073		1.03272		nodulin MtN21 family protein [AT4G28040.1]	TC288240	AT4G28040.1
A_84_P17637	-1.36359	-1.16943		AP2 domain-containing transcription factor, putative [AT4G28140.1]	TC287836	AT4G28140.1
A_84_P824496		1.27085		similar to unnamed protein product [Vitis vinifera] (GB:CAO21222.1); contains InterPro domain RNA-processing protein, HAT helix; (InterPro:IPR003107); contains InterPro domain U3 small nucleolar RNA-associated protein 6 (InterPro:IPR013949) [AT4G28200.1]	TC282460	AT4G28200.1
A_84_P21421		-1.15632		wound-responsive protein-related [AT4G28240.1]	TC282408	AT4G28240.1
A_84_P764897		2.29767		aminotransferase, putative [AT4G28420.2]	TC288305	AT4G28420.2
A_84_P10076		-1.5854		flavin-containing monooxygenase family protein / FMO family protein [AT4G28720.1]	TC287109	AT4G28720.1
A_84_P283520		-1.17843		similar to LPA1 (LOW PSII ACCUMULATION1), binding [Arabidopsis thaliana] (TAIR:AT1G02910.1); similar to OSJNBa0043L24.5 [Oryza sativa (japonica cultivar-group)] (GB:CAE04717.1); similar to unnamed protein product [Vitis vinifera] (GB:CAO40509.1) [AT4G28740.1]	TC306729	AT4G28740.1
A_84_P13857			-2.45397	GDSL-motif lipase/hydrolase family protein [AT4G28780.1]	TC285832	AT4G28780.1
A_84_P23316		2.41897		catalytic [AT4G28940.1]	TC310441	AT4G28940.1
A_84_P15749		4.54075		glycine-rich protein [AT4G29030.1]	TC301534	AT4G29030.1
A_84_P11024		-1.16119		zinc finger (CCCH-type) family protein [AT4G29190.1]	TC285630	AT4G29190.1
A_84_P793028		-1.21757		zinc finger (CCCH-type) family protein [AT4G29190.1]	TC285630	AT4G29190.1
A_84_P12916			1.80219	cytidine deaminase, putative / cytidine aminohydrolase, putative [AT4G29640.1]	NP034613	AT4G29640.1
A_84_P21428		1.47883		PLA IVD/PLP8 (Patatin-like protein 8) [AT4G29800.1]	TC284321	AT4G29800.1
A_84_P560054		-1.5054		similar to unknown protein [Arabidopsis thaliana] (TAIR:AT5G57123.1); similar to hypothetical protein MtrDRAFT_AC148819g4v2 [Medicago truncatula] (GB:ABD28467.1); contains domain Glucocorticoid receptor-like (DNA-binding domain) (SSF57716) [AT4G29905.1]	TC295107	AT4G29905.1
A_84_P135955		1.62266		similar to unknown protein [Arabidopsis thaliana] (TAIR:AT1G30800.1); similar to unnamed protein product [Vitis vinifera] (GB:CAO46771.1) [AT4G29980.1]	TC299433	AT4G29980.1
A_84_P575158		1.14798		similar to unnamed protein product [Vitis vinifera] (GB:CAO47310.1) [AT4G30150.1]	TC297104	AT4G30150.1
A_84_P137779		-1.42017		transcription factor/ transcription regulator [AT4G30180.1]	TC308117	AT4G30180.1
A_84_P811035		2.17448		AHA2 (Arabidopsis H(+)-ATPase 2); ATPase [AT4G30190.1]	TC280559	AT4G30190.1
A_84_P18592		1.87227		AHA2 (Arabidopsis H(+)-ATPase 2); ATPase [AT4G30190.1]	TC280559	AT4G30190.1
A_84_P10084		-1.17267		GAE1 (UDP-D-GLUCURONATE 4-EPIMERASE 1); UDP-glucuronate 4-epimerase/ catalytic [AT4G30440.1]	TC305635	AT4G30440.1
A_84_P793055		-1.34861		GAE1 (UDP-D-GLUCURONATE 4-EPIMERASE 1); UDP-glucuronate 4-epimerase/ catalytic [AT4G30440.1]	TC305635	AT4G30440.1
A_84_P215098		-1.07843		similar to unknown protein [Arabidopsis thaliana] (TAIR:AT2G24070.2); similar to unknown protein [Arabidopsis thaliana] (TAIR:AT2G24070.1); similar to unnamed protein product [Vitis vinifera] (GB:CAO66643.1); contains InterPro domain Protein of unknown function DUF566 (InterPro:IPR007573) [AT4G30710.1]	TC282508	AT4G30710.1
A_84_P279940	-1.29865			similar to unknown protein [Arabidopsis thaliana] (TAIR:AT2G24140.1); similar to unnamed protein product [Vitis vinifera] (GB:CAO66637.1); contains InterPro domain Protein of unknown function DUF593 (InterPro:IPR007656) [AT4G30830.1]	TC285147	AT4G30830.1
A_84_P831408	-1.45547			similar to unknown protein [Arabidopsis thaliana] (TAIR:AT2G24140.1); similar to unnamed protein product [Vitis vinifera] (GB:CAO66637.1); contains InterPro domain Protein of unknown function DUF593 (InterPro:IPR007656) [AT4G30830.1]	TC289046	AT4G30830.1
A_84_P763712		1.18102		binding [AT4G30990.1]	TC280209	AT4G30990.1
A_84_P16706		1.25964		CYP83B1 (CYTOCHROME P450 MONOOXYGENASE 83B1); oxygen binding [AT4G31500.1]	TC308851	AT4G31500.1
A_84_P19544		1.27567	1.56236	WRKY11 (WRKY DNA-binding protein 11); transcription factor [AT4G31550.2]	TC288490	AT4G31550.2
A_84_P786210		1.22797	1.56659	WRKY11 (WRKY DNA-binding protein 11); transcription factor [AT4G31550.2]	TC295406	AT4G31550.2
A_84_P20491		1.15831		diphthine synthase, putative (DPH5) [AT4G31790.1]	TC292202	AT4G31790.1
A_84_P823837		1.08301		diphthine synthase, putative (DPH5) [AT4G31790.2]	TC292202	AT4G31790.2
A_84_P15762	-1.88368			transferase family protein [AT4G31910.1]	TC286142	AT4G31910.1
A_84_P205978		2.41137		CYP82C3 (cytochrome P450, family 82, subfamily C, polypeptide 3); oxygen binding [AT4G31950.1]	TC284664	AT4G31950.1
A_84_P140609		3.15906		CYP82C2 (cytochrome P450, family 82, subfamily C, polypeptide 2); oxygen binding [AT4G31970.1]	TC284390	AT4G31970.1
A_84_P17654		1.26366		similar to unknown protein [Arabidopsis thaliana] (TAIR:AT5G11290.1); similar to unnamed protein product [Vitis vinifera] (GB:CAO46056.1); similar to hypothetical protein [Vitis vinifera] (GB:CAN68458.1); contains InterPro domain Protein of unknown function DUF862, eukaryotic (InterPro:IPR008580); contains InterPro domain Protein of unknown function DUF247, plant (InterPro:IPR004158) [AT4G31980.1]	TC282115	AT4G31980.1
A_84_P55550		-2.39745	-1.49301	IAA29 (indoleacetic acid-induced protein 29); transcription factor [AT4G32280.1]	TC292951	AT4G32280.1
A_84_P59510		2.89281		similar to unknown protein [Arabidopsis thaliana] (TAIR:AT2G20670.1); similar to unnamed protein product [Vitis vinifera] (GB:CAO69754.1); contains InterPro domain Protein of unknown function DUF506, plant (InterPro:IPR006502) [AT4G32480.1]	TC291797	AT4G32480.1
A_84_P818265		2.8287		similar to unknown protein [Arabidopsis thaliana] (TAIR:AT2G20670.1); similar to unnamed protein product [Vitis vinifera] (GB:CAO69754.1); contains InterPro domain Protein of unknown function DUF506, plant (InterPro:IPR006502) [AT4G32480.1]	TC291797	AT4G32480.1
A_84_P11984		1.05928	1.40927	ATKC1 (ARABIDOPSIS THALIANA K+ RECTIFYING CHANNEL 1); cyclic nucleotide binding / inward rectifier potassium channel [AT4G32650.1]	TC282068	AT4G32650.1
A_84_P857154		-1.13453		GAMMA-VPE (Vacuolar processing enzyme gamma); cysteine-type endopeptidase [AT4G32940.1]	TC310877	AT4G32940.1
A_84_P813613		-1.09885		GAMMA-VPE (Vacuolar processing enzyme gamma); cysteine-type endopeptidase [AT4G32940.1]	TC312617	AT4G32940.1
A_84_P17658		-1.18674		ATGLDP1 (ARABIDOPSIS THALIANA GLYCINE DECARBOXYLASE P-PROTEIN 1); glycine dehydrogenase (decarboxylating) [AT4G33010.1]	TC303473	AT4G33010.1
A_84_P806627		-1.27539		ATGLDP1 (ARABIDOPSIS THALIANA GLYCINE DECARBOXYLASE P-PROTEIN 1) [AT4G33010.2]	TC303473	AT4G33010.2
A_84_P781455		-1.37718		ATGLDP1 (ARABIDOPSIS THALIANA GLYCINE DECARBOXYLASE P-PROTEIN 1) [AT4G33010.2]		AT4G33010.2
A_84_P765250	1.04058			similar to unknown protein [Arabidopsis thaliana] (TAIR:AT1G16750.1); similar to unnamed protein product [Vitis vinifera] (GB:CAO65161.1) [AT4G33130.3]	TC296690	AT4G33130.3
A_84_P13877		-1.0398		glycoside hydrolase family 28 protein / polygalacturonase (pectinase) family protein [AT4G33440.1]	TC286010	AT4G33440.1
A_84_P16714		-1.11205		HDA14 (histone deacetylase 14); histone deacetylase [AT4G33470.1]	TC289322	AT4G33470.1
A_84_P81559		1.81019		unknown protein [AT4G33560.1]	TC300404	AT4G33560.1
A_84_P122622		-1.082		unknown protein [AT4G33660.1]	TC300823	AT4G33660.1
A_84_P133655		-1.11776		similar to unknown protein [Arabidopsis thaliana] (TAIR:AT2G23370.1); similar to unnamed protein product [Vitis vinifera] (GB:CAO47838.1) [AT4G34090.1]	TC289947	AT4G34090.1
A_84_P23338		1.43356		EDA9 (embryo sac development arrest 9); NAD binding / amino acid binding / binding / catalytic/ cofactor binding / oxidoreductase, acting on the CH-OH group of donors, NAD or NADP as acceptor / phosphoglycerate dehydrogenase [AT4G34200.1]	TC282195	AT4G34200.1
A_84_P856477		1.92056		EDA9 (embryo sac development arrest 9); NAD binding / amino acid binding / binding / catalytic/ cofactor binding / oxidoreductase, acting on the CH-OH group of donors, NAD or NADP as acceptor / phosphoglycerate dehydrogenase [AT4G34200.1]	TC310498	AT4G34200.1
A_84_P862276		1.89136		EDA9 (embryo sac development arrest 9); NAD binding / amino acid binding / binding / catalytic/ cofactor binding / oxidoreductase, acting on the CH-OH group of donors, NAD or NADP as acceptor / phosphoglycerate dehydrogenase [AT4G34200.1]	TC313836	AT4G34200.1
A_84_P763740		1.84996		ASK11 (ARABIDOPSIS SKP1-LIKE 11); ubiquitin-protein ligase [AT4G34210.1]	TC301909	AT4G34210.1
A_84_P11046	-1.0964			AP2 domain-containing transcription factor, putative [AT4G34410.1]	TC292586	AT4G34410.1
A_84_P764277		1.74672		ASK12 (ARABIDOPSIS SKP1-LIKE 12); protein binding / ubiquitin-protein ligase [AT4G34470.1]	TC301909	AT4G34470.1
A_84_P797964		-1.14614		BLH6 (BELL1-LIKE HOMEODOMAIN 5); DNA binding / transcription factor [AT4G34610.1]	TC284171	AT4G34610.1
A_84_P10101		-1.1775		BLH6 (BELL1-LIKE HOMEODOMAIN 5); DNA binding / transcription factor [AT4G34610.1]	TC284171	AT4G34610.1
A_84_P196024		-2.33361		SQS2 (SQUALENE SYNTHASE 2); farnesyl-diphosphate farnesyltransferase [AT4G34650.1]	TC287514	AT4G34650.1
A_84_P849875		1.23931		ADC2 (ARGININE DECARBOXYLASE 2) [AT4G34710.1]	TC303945	AT4G34710.1
A_84_P18611		1.16274		ATASE2 (GLN PHOSPHORIBOSYL PYROPHOSPHATE AMIDOTRANSFERASE 2); amidophosphoribosyltransferase [AT4G34740.1]	TC283045	AT4G34740.1
A_84_P23341		-3.65588		auxin-responsive family protein [AT4G34790.1]	TC309350	AT4G34790.1
A_84_P21451		-1.08127		CAT2 (CATALASE 2); catalase [AT4G35090.1]	TC302122	AT4G35090.1
A_84_P11995	1.21013			O-methyltransferase family 2 protein [AT4G35160.1]	TC287400	AT4G35160.1
A_84_P545022	2.34291	2.27014	2.16404	similar to unknown protein [Arabidopsis thaliana] (TAIR:AT2G14378.1) [AT4G35165.1]	NP1421681	AT4G35165.1
A_84_P797762		2.28519		similar to unknown protein [Arabidopsis thaliana] (TAIR:AT2G41990.1); similar to hypothetical protein [Vitis vinifera] (GB:CAN73167.1); contains InterPro domain Harpin-induced 1 (InterPro:IPR010847) [AT4G35170.1]	TC300194	AT4G35170.1
A_84_P763170		2.07922		similar to unknown protein [Arabidopsis thaliana] (TAIR:AT2G41990.1); similar to hypothetical protein [Vitis vinifera] (GB:CAN73167.1); contains InterPro domain Harpin-induced 1 (InterPro:IPR010847) [AT4G35170.1]		AT4G35170.1
A_84_P12940		3.20873		LHT7 (LYS/HIS TRANSPORTER 7); amino acid transmembrane transporter [AT4G35180.1]	TC285720	AT4G35180.1
A_84_P17668		-1.53684		vestitone reductase-related [AT4G35250.1]	TC307165	AT4G35250.1
A_84_P13886		-1.17907		AGF1 (AT-HOOK PROTEIN OF GA FEEDBACK 1); transcription factor [AT4G35390.1]	TC291338	AT4G35390.1
A_84_P59040		-1.63342		similar to transducin family protein / WD-40 repeat family protein [Arabidopsis thaliana] (TAIR:AT5G05570.1); similar to unnamed protein product [Vitis vinifera] (GB:CAO14482.1); contains InterPro domain WD40 repeat-like (InterPro:IPR011046); contains InterPro domain WD40/YVTN repeat-like (InterPro:IPR015943); contains InterPro domain WD40 repeat (InterPro:IPR001680) [AT4G35560.1]	TC280859	AT4G35560.1
A_84_P13887		1.23641		PSAT (phosphoserine aminotransferase); phosphoserine transaminase [AT4G35630.1]	TC311611	AT4G35630.1
A_84_P764908	-1.04418			similar to nitrate-responsive NOI protein, putative [Arabidopsis thaliana] (TAIR:AT2G17660.1); similar to unnamed protein product [Vitis vinifera] (GB:CAO45143.1); contains InterPro domain Nitrate-induced NOI (InterPro:IPR008700) [AT4G35655.1]		AT4G35655.1
A_84_P22400			1.29351	SEN1 (DARK INDUCIBLE 1) [AT4G35770.1]	TC306897	AT4G35770.1
A_84_P857167	1.45435		1.47367	SEN1 (DARK INDUCIBLE 1) [AT4G35770.1]	TC310880	AT4G35770.1
A_84_P516656	-1.18833			senescence/dehydration-associated protein-related [AT4G35985.1]	TC284660	AT4G35985.1
A_84_P10108		1.00551		CSDP1 (COLD SHOCK DOMAIN PROTEIN 1); RNA binding / double-stranded DNA binding / nucleic acid binding / single-stranded DNA binding [AT4G36020.1]	TC288121	AT4G36020.1
A_84_P22402	1.19396	1.20959		FAH1 (FERULATE-5-HYDROXYLASE 1); ferulate 5-hydroxylase [AT4G36220.1]	TC291162	AT4G36220.1
A_84_P10135		-1.38338		ROT3 (ROTUNDIFOLIA 3); oxygen binding / steroid hydroxylase [AT4G36380.1]	TC312234	AT4G36380.1
A_84_P12026		-1.43791		UBC17 (UBIQUITIN-CONJUGATING ENZYME 17); ubiquitin-protein ligase [AT4G36410.1]	TC296157	AT4G36410.1
A_84_P259030		-1.49488		hydrolase, alpha/beta fold family protein [AT4G36530.1]	TC297159	AT4G36530.1
A_84_P123562		-2.64457		BEE2 (BR ENHANCED EXPRESSION 2); DNA binding / transcription factor [AT4G36540.1]	TC287307	AT4G36540.1
A_84_P851718		-2.43812		BEE2 (BR ENHANCED EXPRESSION 2); DNA binding / transcription factor [AT4G36540.1]	TC306695	AT4G36540.1
A_84_P833206		-3.39569		late embryogenesis abundant domain-containing protein / LEA domain-containing protein [AT4G36600.1]	TC309756	AT4G36600.1
A_84_P573423		-3.73666		late embryogenesis abundant domain-containing protein / LEA domain-containing protein [AT4G36600.1]	TC309756	AT4G36600.1
A_84_P87489		1.04498		SEC14 cytosolic factor family protein / phosphoglyceride transfer family protein [AT4G36640.1]	TC291526	AT4G36640.1
A_84_P10136	2.14407	2.46201	2.58272	mannitol transporter, putative [AT4G36670.1]	TC305974	AT4G36670.1
A_84_P594805		1.04655		transcription factor [AT4G36820.1]	TC289761	AT4G36820.1
A_84_P816721		1.20275		CPuORF49 (Conserved peptide upstream open reading frame 49) [AT4G36988.1]	TC285914	AT4G36988.1
A_84_P869280		1.11779		CPuORF49 (Conserved peptide upstream open reading frame 49) [AT4G36988.1]	TC285914	AT4G36988.1
A_84_P858787	1.29223	1.55697		CPuORF49 (Conserved peptide upstream open reading frame 49) [AT4G36988.1]	TC311796	AT4G36988.1
A_84_P14863		1.16514		HSF4 (HEAT SHOCK FACTOR 4); DNA binding / transcription factor [AT4G36990.1]	TC285914	AT4G36990.1
A_84_P23377		1.07805		myb family transcription factor [AT4G37180.1]	TC298166	AT4G37180.1
A_84_P823347		1.02287		myb family transcription factor [AT4G37180.2]	TC294709	AT4G37180.2
A_84_P16727		1.02021		YDK1 (YADOKARI 1); indole-3-acetic acid amido synthetase [AT4G37390.1]	TC282970	AT4G37390.1
A_84_P17673		1.1543		CYP81F3 (cytochrome P450, family 81, subfamily F, polypeptide 3); oxygen binding [AT4G37400.1]	TC283726	AT4G37400.1
A_84_P814500	1.98677	2.3334		peroxidase 50 (PER50) (P50) (PRXR2) [AT4G37520.1]	TC297951	AT4G37520.1
A_84_P13891	1.94613	2.32276		peroxidase 50 (PER50) (P50) (PRXR2) [AT4G37520.1]	TC297951	AT4G37520.1
A_84_P14836	1.50719	1.62035		peroxidase, putative [AT4G37530.1]	TC289948	AT4G37530.1
A_84_P57010		2.25389		LBD39 (LOB DOMAIN-CONTAINING PROTEIN 39) [AT4G37540.1]	TC290287	AT4G37540.1
A_84_P21458		1.14305		BT5 (BTB and TAZ domain protein 5); protein binding / transcription regulator [AT4G37610.1]	TC285889	AT4G37610.1
A_84_P71254		1.20259		transposable element gene [AT4G37620.1]	TC305463	AT4G37620.1
A_84_P92139	1.40663			similar to unknown protein [Arabidopsis thaliana] (TAIR:AT5G65925.1) [AT4G37700.1]	TC302519	AT4G37700.1
A_84_P553867		1.61426		ATPSK6 (PHYTOSULFOKINE 6 PRECURSOR); growth factor [AT4G37720.1]	TC311015	AT4G37720.1
A_84_P16729		1.16128		ACS8 (1-Amino-cyclopropane-1-carboxylate synthase 8) [AT4G37770.1]	TC285817	AT4G37770.1
A_84_P17675		3.57033	4.13441	AtMYB87/MYB87 (myb domain protein 87); DNA binding / transcription factor [AT4G37780.1]	TC291454	AT4G37780.1
A_84_P830232		3.01262	3.29565	AtMYB87/MYB87 (myb domain protein 87); DNA binding / transcription factor [AT4G37780.1]	TC291454	AT4G37780.1
A_84_P161103	2.30946	1.46866		basic helix-loop-helix (bHLH) family protein [AT4G37850.1]	TC293241	AT4G37850.1
A_84_P835801		1.18849	1.56122	glycine-rich protein [AT4G37900.1]	TC281373	AT4G37900.1
A_84_P848740		-1.50759		SHM1 (SERINE HYDROXYMETHYLTRANSFERASE 1); glycine hydroxymethyltransferase/ poly(U) binding [AT4G37930.1]	TC301883	AT4G37930.1
A_84_P12948		-1.28716		SHM1 (SERINE HYDROXYMETHYLTRANSFERASE 1); glycine hydroxymethyltransferase/ poly(U) binding [AT4G37930.1]	TC303803	AT4G37930.1
A_84_P21460		2.57081		lyase [AT4G38030.1]	TC282445	AT4G38030.1
A_84_P844671		1.74499		protein kinase family protein [AT4G38470.1]	TC283876	AT4G38470.1
A_84_P79769		1.62159		protein kinase family protein [AT4G38470.1]	TC301256	AT4G38470.1
A_84_P816113		1.03324		monooxygenase, putative (MO2) [AT4G38540.1]	TC305040	AT4G38540.1
A_84_P19571		1.29746		CSDP2/GRP2 (COLD SHOCK DOMAIN PROTEIN 2, GLYCINE RICH PROTEIN 2); nucleic acid binding [AT4G38680.1]	TC312443	AT4G38680.1
A_84_P818229		1.18827		glycine-rich protein [AT4G38710.1]	TC285293	AT4G38710.1
A_84_P22409		1.04343		glycine-rich protein [AT4G38710.1]	TC285293	AT4G38710.1
A_84_P14842		1.47384		protein kinase family protein [AT4G38830.1]	TC282263	AT4G38830.1
A_84_P15788		-1.93016		auxin-responsive protein, putative [AT4G38840.1]	TC298381	AT4G38840.1
A_84_P17680		-2.46297		auxin-responsive protein, putative [AT4G38860.1]	TC302443	AT4G38860.1
A_84_P808639		-1.31206		fructose-bisphosphate aldolase, putative [AT4G38970.1]	TC289811	AT4G38970.1
A_84_P219118		-1.12244		fructose-bisphosphate aldolase, putative [AT4G38970.1]	TC308704	AT4G38970.1
A_84_P853858		-1.21348		fructose-bisphosphate aldolase, putative [AT4G38970.1]	TC308704	AT4G38970.1
A_84_P808645		-1.33498		fructose-bisphosphate aldolase, putative [AT4G38970.1]	TC313085	AT4G38970.1
A_84_P212918		1.50166		EDS5 (ENHANCED DISEASE SUSCEPTIBILITY 5); antiporter/ transporter [AT4G39030.1]	TC282718	AT4G39030.1
A_84_P844839		1.50881		EDS5 (ENHANCED DISEASE SUSCEPTIBILITY 5); antiporter/ transporter [AT4G39030.1]	TC285414	AT4G39030.1
A_84_P787303	-1.01282			SEC14 (secretion 14) [AT4G39180.1]	TC283790	AT4G39180.1
A_84_P21467		1.3934		GGT2 (GAMMA-GLUTAMYL TRANSPEPTIDASE 2); gamma-glutamyltransferase/ glutathione gamma-glutamylcysteinyltransferase [AT4G39650.1]	TC282702	AT4G39650.1
A_84_P60230		-1.3426		heavy-metal-associated domain-containing protein / copper chaperone (CCH)-related [AT4G39700.1]	TC300954	AT4G39700.1
A_84_P545036		-2.24361		senescence-associated protein-related [AT4G39795.1]	TC305036	AT4G39795.1
A_84_P22414		1.63118		DHS1 (3-DEOXY-D-ARABINO-HEPTULOSONATE 7-PHOSPHATE SYNTHASE 1); 3-deoxy-7-phosphoheptulonate synthase [AT4G39980.1]	TC282805	AT4G39980.1
A_84_P12957		1.82923		similar to unknown protein [Arabidopsis thaliana] (TAIR:AT5G16730.1); similar to hypothetical protein [Vitis vinifera] (GB:CAN70653.1); contains domain PTHR23160 (PTHR23160) [AT4G40020.1]	TC282842	AT4G40020.1
A_84_P586802	-2.22365			similar to unknown protein [Arabidopsis thaliana] (TAIR:AT1G65295.1); similar to hypothetical protein [Vitis vinifera] (GB:CAN82885.1); similar to unnamed protein product [Vitis vinifera] (GB:CAO45347.1) [AT5G01015.1]	TC300934	AT5G01015.1
A_84_P23378			1.66367	laccase family protein / diphenol oxidase family protein [AT5G01050.1]	TC310999	AT5G01050.1
A_84_P16757		-1.03856		myb family transcription factor [AT5G01200.1]	TC292300	AT5G01200.1
A_84_P17703		1.7952		transferase family protein [AT5G01210.1]	TC285675	AT5G01210.1
A_84_P18649		-1.01517		SQD2 (SULFOQUINOVOSYLDIACYLGLYCEROL 2); UDP-sulfoquinovose:DAG sulfoquinovosyltransferase/ transferase, transferring glycosyl groups [AT5G01220.1]	TC298537	AT5G01220.1
A_84_P172401		-1.57272		zinc finger (C3HC4-type RING finger) family protein [AT5G01520.1]	TC293244	AT5G01520.1
A_84_P807994		-1.35565		chlorophyll A-B binding protein CP29 (LHCB4) [AT5G01530.1]	TC299272	AT5G01530.1
A_84_P10141		1.40553	1.50722	lectin protein kinase, putative [AT5G01550.1]	TC297073	AT5G01550.1
A_84_P11087		1.74958	1.44737	lectin protein kinase, putative [AT5G01560.1]	TC282065	AT5G01560.1
A_84_P769385		1.45632		other RNA [AT5G01732.1]		AT5G01732.1
A_84_P10142	-1.26792	-1.22652		VHS domain-containing protein / GAT domain-containing protein [AT5G01760.1]	NP205757	AT5G01760.1
A_84_P13923		-1.02777		ATSR1 (SERINE/THREONINE PROTEIN KINASE 1); kinase [AT5G01820.1]	TC283282	AT5G01820.1
A_84_P14868		1.00182		armadillo/beta-catenin repeat family protein / U-box domain-containing protein [AT5G01830.1]	TC282171	AT5G01830.1
A_84_P22436		3.22505		WRKY62 (WRKY DNA-binding protein 62); transcription factor [AT5G01900.1]	TC293239	AT5G01900.1
A_84_P20545		-1.20381		OHP (ONE HELIX PROTEIN) [AT5G02120.1]	TC301454	AT5G02120.1
A_84_P528200		-1.28131	-1.35066	FHL (FAR-RED-ELONGATED HYPOCOTYL1-LIKE); protein binding [AT5G02200.1]	TC301641	AT5G02200.1
A_84_P790810		-1.38265	-1.35908	FHL (FAR-RED-ELONGATED HYPOCOTYL1-LIKE); protein binding [AT5G02200.1]	TC301641	AT5G02200.1
A_84_P766447		1.1187		HSC70-1 (heat shock cognate 70 kDa protein 1); ATP binding [AT5G02500.1]	TC308157	AT5G02500.1
A_84_P12982		-2.62052		similar to unknown protein [Arabidopsis thaliana] (TAIR:AT3G46300.1); similar to hypothetical protein [Vitis vinifera] (GB:CAN66779.1) [AT5G02640.1]	TC294406	AT5G02640.1
A_84_P17710	-1.7683	-2.34002		protein phosphatase 2C family protein / PP2C family protein [AT5G02760.1]	TC313571	AT5G02760.1
A_84_P18656	1.60673	1.74826		In2-1 protein, putative [AT5G02780.1]	TC294017	AT5G02780.1
A_84_P23386		-1.01102		LCL1 (LHY/CCA1-LIKE 1); DNA binding / transcription factor [AT5G02840.1]	NP207350	AT5G02840.1
A_84_P856502		-1.27943		CPuORF47 (Conserved peptide upstream open reading frame 47) [AT5G03190.1]	TC310508	AT5G03190.1
A_84_P55560	-1.17465			CPuORF47 (Conserved peptide upstream open reading frame 47) [AT5G03190.1]		AT5G03190.1
A_84_P190724	1.15181	1.42662		heavy-metal-associated domain-containing protein [AT5G03380.1]	TC288212	AT5G03380.1
A_84_P12039		1.62359		GDSL-motif lipase/hydrolase family protein [AT5G03610.1]	TC287348	AT5G03610.1
A_84_P854061		2.19052		GDSL-motif lipase/hydrolase family protein [AT5G03610.1]	TC308862	AT5G03610.1
A_84_P21496		2.87821	2.46312	PAN domain-containing protein [AT5G03700.1]	NP206680	AT5G03700.1
A_84_P22442	-1.59734	-2.41938		AT-HSFA3 (Arabidopsis thaliana heat shock transcription factor A3); DNA binding / transcription factor [AT5G03720.1]	TC289784	AT5G03720.1
A_84_P732491	-3.17717	-2.70179		unknown protein [AT5G03995.1]	TC302879	AT5G03995.1
A_84_P275630		-2.23661		similar to hypothetical protein [Vitis vinifera] (GB:CAN76250.1) [AT5G04000.1]	TC295012	AT5G04000.1
A_84_P585037	-2.12727			similar to unknown protein [Arabidopsis thaliana] (TAIR:AT5G03920.1); similar to unnamed protein product [Vitis vinifera] (GB:CAO23344.1); contains domain SSF81383 (SSF81383) [AT5G04010.1]	TC292346	AT5G04010.1
A_84_P15095		-1.31296		GLS1/GLU1/GLUS (FERREDOXIN-DEPENDENT GLUTAMATE SYNTHASE 1); glutamate synthase (ferredoxin) [AT5G04140.1]	TC303580	AT5G04140.1
A_84_P16041		-1.47105		BHLH101; DNA binding / transcription factor [AT5G04150.1]	TC293823	AT5G04150.1
A_84_P19825		-1.78822		PKS4 (PHYTOCHROME KINASE SUBSTRATE 4) [AT5G04190.1]	TC287766	AT5G04190.1
A_84_P20552		-1.02641		VTE5 (VITAMIN E PATHWAY GENE5); phosphatidate cytidylyltransferase/ phytol kinase [AT5G04490.1]	TC289194	AT5G04490.1
A_84_P192044		-1.34776		similar to unknown protein [Arabidopsis thaliana] (TAIR:AT5G04700.1); similar to unknown protein [Arabidopsis thaliana] (TAIR:AT5G04680.1); similar to unnamed protein product [Vitis vinifera] (GB:CAO64101.1); contains InterPro domain Ankyrin (InterPro:IPR002110) [AT5G04690.1]	TC312514	AT5G04690.1
A_84_P828701	-1.09605			ATOFP13/OFP13 (Arabidopsis thaliana ovate family protein 13) [AT5G04820.1]	TC288368	AT5G04820.1
A_84_P152928			1.41331	similar to unknown protein [Arabidopsis thaliana] (TAIR:AT3G11760.1); similar to unnamed protein product [Vitis vinifera] (GB:CAO39924.1); contains domain Class I glutamine amidotransferase-like (SSF52317) [AT5G04860.1]	TC292306	AT5G04860.1
A_84_P833567			1.76877	similar to unknown protein [Arabidopsis thaliana] (TAIR:AT3G11760.1); similar to unnamed protein product [Vitis vinifera] (GB:CAO39924.1); contains domain Class I glutamine amidotransferase-like (SSF52317) [AT5G04860.1]	TC292306	AT5G04860.1
A_84_P837674		-1.04357		leucine-rich repeat transmembrane protein kinase, putative [AT5G05160.1]	TC297195	AT5G05160.1
A_84_P11099		-1.48983		leucine-rich repeat transmembrane protein kinase, putative [AT5G05160.1]	TC297195	AT5G05160.1
A_84_P237233			1.14919	Identical to Uncharacterized protein At5g05190 (Y-1) [Arabidopsis Thaliana] (GB:Q9FHK4); similar to unknown protein [Arabidopsis thaliana] (TAIR:AT3G56410.1); similar to unknown protein [Arabidopsis thaliana] (TAIR:AT3G56410.2); similar to unnamed protein product [Vitis vinifera] (GB:CAO41531.1); similar to hypothetical protein [Vitis vinifera] (GB:CAN78033.1) [AT5G05190.1]		AT5G05190.1
A_84_P284470		-1.4681	-1.85159	similar to unknown protein [Arabidopsis thaliana] (TAIR:AT3G56360.1); similar to unnamed protein product [Vitis vinifera] (GB:CAO41488.1) [AT5G05250.1]	TC293874	AT5G05250.1
A_84_P18663			2.34747	peroxidase, putative [AT5G05340.1]	TC290433	AT5G05340.1
A_84_P69494	1.26175	1.60225	1.7721	ATGCP2/TUBG2 (GAMMA-TUBULIN); structural molecule [AT5G05620.1]		AT5G05620.1
A_84_P19610		-1.12956		CPD (CABBAGE 3); oxygen binding [AT5G05690.1]	TC283981	AT5G05690.1
A_84_P813697		-1.19455		CPD (CABBAGE 3); oxygen binding [AT5G05690.2]	TC283981	AT5G05690.2
A_84_P609053	-2.39733			ATGPAT7/GPAT7 (GLYCEROL-3-PHOSPHATE ACYLTRANSFERASE 7); 1-acylglycerol-3-phosphate O-acyltransferase/ acyltransferase [AT5G06090.1]	NP224142	AT5G06090.1
A_84_P833718		1.04899		DNAJ heat shock N-terminal domain-containing protein / cell division protein-related [AT5G06110.1]	TC294962	AT5G06110.1
A_84_P505144		-1.06033		FLA17 (FASCICLIN-LIKE ARABINOGALACTAN PROTEIN 17 PRECURSOR) [AT5G06390.1]	TC286141	AT5G06390.1
A_84_P22452		1.15946		PGIP1 (POLYGALACTURONASE INHIBITING PROTEIN 1); protein binding [AT5G06860.1]	TC290218	AT5G06860.1
A_84_P74074		-1.03226		proline-rich family protein [AT5G07020.1]	TC290762	AT5G07020.1
A_84_P23399		-2.17651		transferase family protein [AT5G07080.1]	TC286068	AT5G07080.1
A_84_P194044		-2.66669		similar to unknown protein [Arabidopsis thaliana] (TAIR:AT1G63060.1); similar to unknown [Xerophyta humilis] (GB:AAT45004.1) [AT5G07330.1]	TC296333	AT5G07330.1
A_84_P12053		2.70021		GDH2 (GLUTAMATE DEHYDROGENASE 2); oxidoreductase [AT5G07440.1]	TC287594	AT5G07440.1
A_84_P809927		3.6085		GDH2 (GLUTAMATE DEHYDROGENASE 2) [AT5G07440.3]	TC304455	AT5G07440.3
A_84_P809928		2.62604		GDH2 (GLUTAMATE DEHYDROGENASE 2) [AT5G07440.3]	TC305574	AT5G07440.3
A_84_P18674	-1.18416			DGK1 (DIACYLGLYCEROL KINASE 1, DIACYLGLYCEROL KINASE1); diacylglycerol kinase [AT5G07920.1]	TC281088	AT5G07920.1
A_84_P23593		1.23798		GRAM domain-containing protein / ABA-responsive protein-related [AT5G08350.1]	TC291172	AT5G08350.1
A_84_P13003		-1.16406		GTP-binding protein LepA, putative [AT5G08650.1]	TC281828	AT5G08650.1
A_84_P805904	1.24905			phosphate-responsive protein, putative [AT5G09440.1]	TC288945	AT5G09440.1
A_84_P11307	1.3367			phosphate-responsive protein, putative [AT5G09440.1]	TC303224	AT5G09440.1
A_84_P845689		-1.43365		PMDH2 (PEROXISOMAL NAD-MALATE DEHYDROGENASE 2); malate dehydrogenase [AT5G09660.1]	TC292646	AT5G09660.1
A_84_P23407		-1.43553		PMDH2 (PEROXISOMAL NAD-MALATE DEHYDROGENASE 2); malate dehydrogenase [AT5G09660.1]	TC307453	AT5G09660.1
A_84_P22462		-1.57359		ATGCN2 (Arabidopsis thaliana general control non-repressible 2) [AT5G09930.1]	NP230516	AT5G09930.1
A_84_P18681		1.15364		RBK1 (ROP BINDING PROTEIN KINASES 1); kinase [AT5G10520.1]	NP211056	AT5G10520.1
A_84_P19628		1.4058		integral membrane transporter family protein [AT5G10820.1]	TC301944	AT5G10820.1
A_84_P14899	-1.40074			CIPK5 (CBL-INTERACTING PROTEIN KINASE 5); kinase [AT5G10930.1]	TC302825	AT5G10930.1
A_84_P13955		1.2436		ATGLR2.5 (Arabidopsis thaliana glutamate receptor 2.5) [AT5G11210.1]	TC302817	AT5G11210.1
A_84_P13011		-1.569		similar to unknown protein [Arabidopsis thaliana] (TAIR:AT5G25460.1); similar to unknown [Ricinus communis] (GB:CAB02653.1); contains InterPro domain Protein of unknown function DUF642 (InterPro:IPR006946); contains InterPro domain Galactose-binding like (InterPro:IPR008979) [AT5G11420.1]	TC286215	AT5G11420.1
A_84_P814302		-1.64462		similar to unknown protein [Arabidopsis thaliana] (TAIR:AT5G25460.1); similar to unknown [Ricinus communis] (GB:CAB02653.1); contains InterPro domain Protein of unknown function DUF642 (InterPro:IPR006946); contains InterPro domain Galactose-binding like (InterPro:IPR008979) [AT5G11420.1]	TC286215	AT5G11420.1
A_84_P562774		2.02435		similar to unknown protein [Arabidopsis thaliana] (TAIR:AT1G28190.1); similar to unnamed protein product [Vitis vinifera] (GB:CAO16848.1) [AT5G12340.1]	NP369633	AT5G12340.1
A_84_P282550		1.56523		similar to unknown protein [Arabidopsis thaliana] (TAIR:AT5G16350.1); similar to unnamed protein product [Vitis vinifera] (GB:CAO48523.1); contains InterPro domain Protein of unknown function UPF0089 (InterPro:IPR004255); contains InterPro domain Protein of unknown function DUF1298 (InterPro:IPR009721) [AT5G12420.1]	TC284647	AT5G12420.1
A_84_P11125		2.03832	1.4091	proline-rich family protein [AT5G12880.1]	TC303866	AT5G12880.1
A_84_P786837	1.17489	1.59422		WRKY75 (WRKY DNA-BINDING PROTEIN 75); transcription factor [AT5G13080.1]	TC302959	AT5G13080.1
A_84_P21703	1.12867	1.55807		WRKY75 (WRKY DNA-BINDING PROTEIN 75); transcription factor [AT5G13080.1]	TC302959	AT5G13080.1
A_84_P311083		1.42054		transposable element gene [AT5G13485.1]		AT5G13485.1
A_84_P817347		1.46866		AAC2 (ADP/ATP CARRIER 2); binding [AT5G13490.2]	TC306309	AT5G13490.2
A_84_P17745		-1.1549		SIG4 (SIGMA FACTOR 4); DNA binding / DNA-directed RNA polymerase/ transcription factor [AT5G13730.1]	TC287327	AT5G13730.1
A_84_P786520	-1.52158	-1.44734		similar to unknown protein [Arabidopsis thaliana] (TAIR:AT5G47920.1); similar to hypothetical protein [Vitis vinifera] (GB:CAN74736.1) [AT5G13880.1]	NP236498	AT5G13880.1
A_84_P78679	-1.44351			similar to unknown protein [Arabidopsis thaliana] (TAIR:AT5G47920.1); similar to hypothetical protein [Vitis vinifera] (GB:CAN74736.1) [AT5G13880.1]	TC295093	AT5G13880.1
A_84_P768637		-1.27081		MIR398C; miRNA [AT5G14565.1]		AT5G14565.1
A_84_P13966	1.40487			polygalacturonase, putative / pectinase, putative [AT5G14650.1]	TC286839	AT5G14650.1
A_84_P174131		1.31777		similar to unknown protein [Arabidopsis thaliana] (TAIR:AT3G01513.1); similar to unnamed protein product [Vitis vinifera] (GB:CAO64332.1); similar to hypothetical protein [Vitis vinifera] (GB:CAN65788.1) [AT5G14730.1]	TC293541	AT5G14730.1
A_84_P18848		-2.00548		CA2 (BETA CARBONIC ANHYDRASE 2); carbonate dehydratase/ zinc ion binding [AT5G14740.1]	TC301866	AT5G14740.1
A_84_P810020		-1.85532		CA2 (BETA CARBONIC ANHYDRASE 2); carbonate dehydratase/ zinc ion binding [AT5G14740.2]	TC301866	AT5G14740.2
A_84_P810038		-2.11698		CA2 (BETA CARBONIC ANHYDRASE 2); carbonate dehydratase/ zinc ion binding [AT5G14740.3]	TC310544	AT5G14740.3
A_84_P13175	-1.30662			ATCNGC18/CNGC18 (CYCLIC NUCLEOTIDE-GATED CHANNEL 18); calmodulin binding / cyclic nucleotide binding / ion channel [AT5G14870.1]	TC297602	AT5G14870.1
A_84_P267870			1.16475	SAG101 (SENESCENCE-ASSOCIATED GENE 101); triacylglycerol lipase [AT5G14930.1]	TC298457	AT5G14930.1
A_84_P17903	-1.11115	-1.10361		DEL2/E2FD/E2L1 (DP-E2F-LIKE 2); DNA binding / transcription factor [AT5G14960.1]	TC289152	AT5G14960.1
A_84_P18695		4.17963		WRKY72 (WRKY DNA-binding protein 72); transcription factor [AT5G15130.1]	TC297752	AT5G15130.1
A_84_P837245		3.79959		WRKY72 (WRKY DNA-binding protein 72); transcription factor [AT5G15130.1]	TC297752	AT5G15130.1
A_84_P281230		-1.33946		bHLH family protein [AT5G15160.1]	TC298809	AT5G15160.1
A_84_P11132	-1.54831			GASA4 (GAST1 PROTEIN HOMOLOG 4) [AT5G15230.1]	TC311855	AT5G15230.1
A_84_P837069	-1.36307			similar to unknown protein [Arabidopsis thaliana] (TAIR:AT3G01015.1); similar to unnamed protein product [Vitis vinifera] (GB:CAO15061.1); contains InterPro domain Targeting for Xklp2 (InterPro:IPR009675) [AT5G15510.1]	TC310938	AT5G15510.1
A_84_P608384		1.06146		F-box family protein [AT5G15660.1]	NP229926	AT5G15660.1
A_84_P540652	-1.61013			similar to unknown protein [Arabidopsis thaliana] (TAIR:AT5G15890.1); similar to unnamed protein product [Vitis vinifera] (GB:CAO49265.1); contains InterPro domain Protein of unknown function DUF231, plant (InterPro:IPR004253) [AT5G15900.1]	TC302567	AT5G15900.1
A_84_P22636		1.15383		oxidoreductase [AT5G15940.1]	TC305740	AT5G15940.1
A_84_P12234		-1.94945		similar to unknown protein [Arabidopsis thaliana] (TAIR:AT3G02500.1); similar to hypothetical protein [Cleome spinosa] (GB:ABD96956.1) [AT5G16030.1]	TC287461	AT5G16030.1
A_84_P856901		-1.99766		similar to unknown protein [Arabidopsis thaliana] (TAIR:AT3G02500.1); similar to hypothetical protein [Cleome spinosa] (GB:ABD96956.1) [AT5G16030.1]	TC310743	AT5G16030.1
A_84_P587734		1.29765		similar to unknown protein [Arabidopsis thaliana] (TAIR:AT5G11730.1); similar to unnamed protein product [Vitis vinifera] (GB:CAO49350.1); contains InterPro domain Protein of unknown function DUF266, plant (InterPro:IPR004949) [AT5G16170.1]	TC290248	AT5G16170.1
A_84_P21535		-1.13004		ZFN3 (ZINC FINGER PROTEIN 3); nucleic acid binding [AT5G16540.2]	TC285859	AT5G16540.2
A_84_P52990		1.14482	1.4073	GLN1;4 (Glutamine synthetase 1;4); glutamate-ammonia ligase [AT5G16570.1]	TC287954	AT5G16570.1
A_84_P784713	-1.92134	-1.82284		MYB43 (myb domain protein 43); DNA binding / transcription factor [AT5G16600.1]	TC296946	AT5G16600.1
A_84_P301960		-1.05946		DHAR3 (DEHYDROASCORBATE REDUCTASE 1); glutathione dehydrogenase (ascorbate) [AT5G16710.1]	NP229832	AT5G16710.1
A_84_P12236		1.425		leucine-rich repeat protein kinase, putative [AT5G16900.1]	NP229851	AT5G16900.1
A_84_P856001	-1.22274	-1.42317		similar to unknown [Populus trichocarpa] (GB:ABK93757.1) [AT5G17460.1]	TC310214	AT5G17460.1
A_84_P255220	-1.46244	-1.29311		similar to unknown [Populus trichocarpa] (GB:ABK93757.1) [AT5G17460.1]	TC313953	AT5G17460.1
A_84_P20748		-1.54489		RCP1 (ROOT CAP 1) [AT5G17520.1]	TC284614	AT5G17520.1
A_84_P51520		-1.32946		hydrolase, acting on ester bonds [AT5G17670.1]	TC290344	AT5G17670.1
A_84_P256230			1.06261	similar to unknown protein [Arabidopsis thaliana] (TAIR:AT5G14602.1); similar to unnamed protein product [Vitis vinifera] (GB:CAO23480.1); contains domain PTHR12133 (PTHR12133) [AT5G18150.1]	TC297385	AT5G18150.1
A_84_P18701		1.00952		similar to unknown protein [Arabidopsis thaliana] (TAIR:AT5G48500.1); similar to unnamed protein product [Vitis vinifera] (GB:CAO38794.1) [AT5G18310.1]	TC299819	AT5G18310.1
A_84_P20593		1.30253		disease resistance protein (TIR-NBS-LRR class), putative [AT5G18350.1]		AT5G18350.1
A_84_P768303	-1.65859	-1.6752		Encodes a defensin-like (DEFL) family protein. [AT5G18407.1]		AT5G18407.1
A_84_P601103	-1.25603	-1.08283		similar to unknown protein [Arabidopsis thaliana] (TAIR:AT1G50830.1); similar to unnamed protein product [Vitis vinifera] (GB:CAO38989.1); contains InterPro domain Protein of unknown function DUF1723 (InterPro:IPR013541) [AT5G18510.1]		AT5G18510.1
A_84_P11141			-1.13469	heavy-metal-associated domain-containing protein [AT5G19090.1]	TC305801	AT5G19090.1
A_84_P131376		-1.80705		similar to unknown protein [Arabidopsis thaliana] (TAIR:AT3G06070.1); similar to unnamed protein product [Vitis vinifera] (GB:CAO71112.1) [AT5G19190.1]	TC297648	AT5G19190.1
A_84_P210768	1.81516	2.8408	1.76455	Identical to Uncharacterized GPI-anchored protein At5g19230 precursor [Arabidopsis Thaliana] (GB:Q8GUL8); similar to unknown protein [Arabidopsis thaliana] (TAIR:AT5G19240.1); similar to unknown [Populus trichocarpa] (GB:ABK94712.1) [AT5G19230.1]	TC297687	AT5G19230.1
A_84_P20754	-1.42842			CPK34 (calcium-dependent protein kinase 34); calmodulin-dependent protein kinase/ kinase [AT5G19360.1]		AT5G19360.1
A_84_P13193		-1.17052		tryptophan/tyrosine permease family protein [AT5G19500.1]		AT5G19500.1
A_84_P20750		2.00482		peroxidase, putative [AT5G19890.1]	TC288164	AT5G19890.1
A_84_P13185		1.1821		protein kinase family protein [AT5G20050.1]	TC307518	AT5G20050.1
A_84_P22643	1.67498		1.61834	SPX (SYG1/Pho81/XPR1) domain-containing protein [AT5G20150.1]	TC289232	AT5G20150.1
A_84_P14131	1.07663	1.60804		DIN10 (DARK INDUCIBLE 10); hydrolase, hydrolyzing O-glycosyl compounds [AT5G20250.1]	TC303420	AT5G20250.1
A_84_P811412	1.3079	1.79805	1.11134	DIN10 (DARK INDUCIBLE 10); hydrolase, hydrolyzing O-glycosyl compounds [AT5G20250.2]	TC300650	AT5G20250.2
A_84_P811407	1.26619	1.77634		DIN10 (DARK INDUCIBLE 10); hydrolase, hydrolyzing O-glycosyl compounds [AT5G20250.2]	TC300650	AT5G20250.2
A_84_P852163	1.1556	1.62444		DIN10 (DARK INDUCIBLE 10); hydrolase, hydrolyzing O-glycosyl compounds [AT5G20250.2]	TC307238	AT5G20250.2
A_84_P811421	1.04986	1.58713		DIN10 (DARK INDUCIBLE 10); hydrolase, hydrolyzing O-glycosyl compounds [AT5G20250.2]	TC308412	AT5G20250.2
A_84_P856007	1.22723	1.65627	1.02199	DIN10 (DARK INDUCIBLE 10); hydrolase, hydrolyzing O-glycosyl compounds [AT5G20250.3]	TC310216	AT5G20250.3
A_84_P821073		-1.11469		transporter-related [AT5G20380.1]	TC301483	AT5G20380.1
A_84_P16974	-5.207		-3.14165	GLP3 (GERMIN-LIKE PROTEIN 3); manganese ion binding / metal ion binding / nutrient reservoir [AT5G20630.1]	TC295739	AT5G20630.1
A_84_P855617	-3.31713		-2.48251	GLP3 (GERMIN-LIKE PROTEIN 3); manganese ion binding / metal ion binding / nutrient reservoir [AT5G20630.1]	TC309937	AT5G20630.1
A_84_P130356			1.52445	similar to unknown protein [Arabidopsis thaliana] (TAIR:AT3G43110.1) [AT5G20790.1]	TC295432	AT5G20790.1
A_84_P11294		-1.35402		similar to unnamed protein product [Vitis vinifera] (GB:CAO67410.1) [AT5G20935.1]		AT5G20935.1
A_84_P14129	1.06375	1.47553		AAO1 (ALDEHYDE OXIDASE 1) [AT5G20960.1]	TC280296	AT5G20960.1
A_84_P829748		1.52242		AAO1 (ALDEHYDE OXIDASE 1) [AT5G20960.2]	TC280296	AT5G20960.2
A_84_P504309		-1.99365		DNAJ heat shock N-terminal domain-containing protein [AT5G21430.1]	TC294360	AT5G21430.1
A_84_P852804		-1.7731		DNAJ heat shock N-terminal domain-containing protein [AT5G21430.2]	TC307886	AT5G21430.2
A_84_P130576		1.02884		similar to unknown protein [Arabidopsis thaliana] (TAIR:AT5G22160.1); similar to unknown protein [Arabidopsis thaliana] (TAIR:AT5G22150.1) [AT5G22190.1]	NP331204	AT5G22190.1
A_84_P22489			1.00677	CCR4-NOT transcription complex protein, putative [AT5G22250.1]	TC291734	AT5G22250.1
A_84_P240045		1.45109	1.29376	similar to unknown protein [Arabidopsis thaliana] (TAIR:AT5G06270.1); similar to unnamed protein product [Vitis vinifera] (GB:CAO15841.1); similar to hypothetical protein [Vitis vinifera] (GB:CAN79170.1) [AT5G22270.1]	TC310116	AT5G22270.1
A_84_P10196		2.0559		NIT4 (NITRILASE 4) [AT5G22300.1]	TC287175	AT5G22300.1
A_84_P830586		-1.04895		similar to unknown protein [Arabidopsis thaliana] (TAIR:AT3G11590.1); similar to unnamed protein product [Vitis vinifera] (GB:CAO48696.1) [AT5G22310.1]	NP231478	AT5G22310.1
A_84_P305320		-1.00993		similar to unknown protein [Arabidopsis thaliana] (TAIR:AT3G11590.1); similar to unnamed protein product [Vitis vinifera] (GB:CAO48696.1) [AT5G22310.1]	TC285506	AT5G22310.1
A_84_P15868	-1.34417			ANAC090 (Arabidopsis NAC domain containing protein 90); transcription factor [AT5G22380.1]	TC293164	AT5G22380.1
A_84_P795530		-1.32517		similar to unnamed protein product [Vitis vinifera] (GB:CAO48728.1) [AT5G22390.1]	TC292921	AT5G22390.1
A_84_P221276		-1.38001		similar to unnamed protein product [Vitis vinifera] (GB:CAO48728.1) [AT5G22390.1]	TC292921	AT5G22390.1
A_84_P262640		5.26388		similar to unknown protein [Arabidopsis thaliana] (TAIR:AT2G27385.1); similar to hypothetical protein [Vitis vinifera] (GB:CAN68427.1) [AT5G22430.1]	TC291164	AT5G22430.1
A_84_P807598		4.42856		similar to unknown protein [Arabidopsis thaliana] (TAIR:AT2G27385.1); similar to hypothetical protein [Vitis vinifera] (GB:CAN68427.1) [AT5G22430.1]	TC301811	AT5G22430.1
A_84_P10198	1.31027	1.78702		zinc finger (C3HC4-type RING finger) family protein [AT5G22920.1]	TC288594	AT5G22920.1
A_84_P814618	1.26037	1.70685		zinc finger (C3HC4-type RING finger) family protein [AT5G22920.1]	TC288594	AT5G22920.1
A_84_P14924		1.46106		ATMYB37/MYB37/RAX1 (myb domain protein 37); DNA binding / transcription factor [AT5G23000.1]	TC293826	AT5G23000.1
A_84_P152528		-1.45933		similar to unknown protein [Arabidopsis thaliana] (TAIR:AT3G59780.1); similar to extracellular Ca2+ sensing receptor [Glycine max] (GB:ABY57763.1); contains InterPro domain Rhodanese-like (InterPro:IPR001763) [AT5G23060.1]	TC286094	AT5G23060.1
A_84_P814104		-1.61102		similar to unknown protein [Arabidopsis thaliana] (TAIR:AT3G59780.1); similar to extracellular Ca2+ sensing receptor [Glycine max] (GB:ABY57763.1); contains InterPro domain Rhodanese-like (InterPro:IPR001763) [AT5G23060.1]	TC286094	AT5G23060.1
A_84_P846067		-1.62456		similar to unknown protein [Arabidopsis thaliana] (TAIR:AT3G59780.1); similar to extracellular Ca2+ sensing receptor [Glycine max] (GB:ABY57763.1); contains InterPro domain Rhodanese-like (InterPro:IPR001763) [AT5G23060.1]	TC295118	AT5G23060.1
A_84_P786169		-1.64421		similar to unknown protein [Arabidopsis thaliana] (TAIR:AT3G59780.1); similar to extracellular Ca2+ sensing receptor [Glycine max] (GB:ABY57763.1); contains InterPro domain Rhodanese-like (InterPro:IPR001763) [AT5G23060.1]	TC295118	AT5G23060.1
A_84_P21546		-1.34483		HCF136 (High chlorophyll fluorescence 136) [AT5G23120.1]	TC286154	AT5G23120.1
A_84_P767650		1.08653		similar to unknown protein [Arabidopsis thaliana] (TAIR:AT5G23490.1); similar to unnamed protein product [Vitis vinifera] (GB:CAO67077.1) [AT5G23510.1]		AT5G23510.1
A_84_P867201		-1.66749		remorin family protein [AT5G23750.1]	TC291070	AT5G23750.1
A_84_P542440		-1.51182		remorin family protein [AT5G23750.2]	TC294845	AT5G23750.2
A_84_P106106	1.43874			MD-2-related lipid recognition domain-containing protein / ML domain-containing protein [AT5G23820.1]	TC293703	AT5G23820.1
A_84_P13982		-1.06454		pectinacetylesterase family protein [AT5G23870.1]	TC294441	AT5G23870.1
A_84_P825282		-1.33569		pectinacetylesterase family protein [AT5G23870.1]	TC294441	AT5G23870.1
A_84_P796375	-1.19582	-1.49261		transposable element gene [AT5G23955.1]	TC304949	AT5G23955.1
A_84_P19657		-1.11603		ATFRO4/FRO4 (FERRIC REDUCTION OXIDASE 4); ferric-chelate reductase [AT5G23980.1]	NP229723	AT5G23980.1
A_84_P20603			3.03769	ATFRO5/FRO5 (FERRIC REDUCTION OXIDASE 5); ferric-chelate reductase [AT5G23990.1]	NP229724	AT5G23990.1
A_84_P768906		2.24444		other RNA [AT5G24205.1]		AT5G24205.1
A_84_P768909		2.57549		other RNA [AT5G24206.1]		AT5G24206.1
A_84_P19658		1.3594		phosphatidylinositol 3- and 4-kinase family protein / ubiquitin family protein [AT5G24240.1]	TC312111	AT5G24240.1
A_84_P21550		1.17471		SOS3 (SALT OVERLY SENSITIVE 3) [AT5G24270.1]	NP029956	AT5G24270.1
A_84_P823079		1.26722		integral membrane family protein [AT5G24290.1]	TC284115	AT5G24290.1
A_84_P146458		1.2184		integral membrane family protein [AT5G24290.1]	TC307409	AT5G24290.1
A_84_P13039	2.26762	1.1022		glucosamine/galactosamine-6-phosphate isomerase-related [AT5G24420.1]	TC310557	AT5G24420.1
A_84_P13984		1.33755		calcium-dependent protein kinase, putative / CDPK, putative [AT5G24430.1]	TC299450	AT5G24430.1
A_84_P809527		1.48071		calcium-dependent protein kinase, putative / CDPK, putative [AT5G24430.1]	TC305288	AT5G24430.1
A_84_P853774		1.3395		calcium-dependent protein kinase, putative / CDPK, putative [AT5G24430.1]	TC308658	AT5G24430.1
A_84_P102996		-1.2006		copper-binding family protein [AT5G24580.1]	TC288491	AT5G24580.1
A_84_P821812		-1.5728		copper-binding family protein [AT5G24580.2]	TC307127	AT5G24580.2
A_84_P534471			1.05934	similar to unknown protein [Arabidopsis thaliana] (TAIR:AT5G24660.1); similar to unknown protein [Brassica rapa subsp. pekinensis] (GB:AAQ92331.1) [AT5G24655.1]	TC300007	AT5G24655.1
A_84_P192864	1.27739		1.29609	alcohol dehydrogenase, putative [AT5G24760.1]	TC286429	AT5G24760.1
A_84_P822542	1.26883	1.26733	1.21408	alcohol dehydrogenase, putative [AT5G24760.3]	NP281725	AT5G24760.3
A_84_P788980	1.30796	1.22815	1.29871	alcohol dehydrogenase, putative [AT5G24760.3]	TC288585	AT5G24760.3
A_84_P141439		-1.67501		VSP2 (VEGETATIVE STORAGE PROTEIN 2); acid phosphatase [AT5G24770.1]	TC312910	AT5G24770.1
A_84_P16822		1.02744		methyltransferase [AT5G24840.1]		AT5G24840.1
A_84_P21553	-1.12447			CIPK25 (CBL-INTERACTING PROTEIN KINASE 25); kinase [AT5G25110.1]	TC285334	AT5G25110.1
A_84_P13988		1.4747		ubiquinol-cytochrome C reductase complex 14 kDa protein, putative [AT5G25450.1]	TC302296	AT5G25450.1
A_84_P17772		-2.14149		TNY (TINY); DNA binding / transcription factor [AT5G25810.1]	TC293833	AT5G25810.1
A_84_P560172		1.77345		similar to ATP binding / aminoacyl-tRNA ligase/ aspartic-type endopeptidase/ nucleotide binding [Arabidopsis thaliana] (TAIR:AT3G29750.1) [AT5G25920.1]	NP034489	AT5G25920.1
A_84_P14936	1.72649			ChaC-like family protein [AT5G26220.1]	NP041403	AT5G26220.1
A_84_P187184	-2.19287			meprin and TRAF homology domain-containing protein / MATH domain-containing protein [AT5G26280.1]	TC287699	AT5G26280.1
A_84_P18720		1.04628		MSS1 (SUGAR TRANSPORT PROTEIN 13); carbohydrate transmembrane transporter/ hexose:hydrogen symporter/ high-affinity hydrogen:glucose symporter/ sugar:hydrogen ion symporter [AT5G26340.1]	TC295904	AT5G26340.1
A_84_P60330	1.49868	2.12928		disease resistance family protein [AT5G27060.1]	NP033498	AT5G27060.1
A_84_P816646		1.13916		GSH2/GSHB (GLUTATHIONE SYNTHETASE 2); glutathione synthase [AT5G27380.1]	TC307150	AT5G27380.1
A_84_P12104		1.16944		GSH2/GSHB (GLUTATHIONE SYNTHETASE 2); glutathione synthase [AT5G27380.1]	TC307558	AT5G27380.1
A_84_P767053		2.81883		transposable element gene [AT5G28141.1]		AT5G28141.1
A_84_P783704		1.43188		transposable element gene [AT5G28526.1]	NP281557	AT5G28526.1
[truncated: 507 more rows]

## Sheet: genes
vol H7 flagella 0.05
AH_infiltrate_12-03-2015
Treatment ()*				Fold change (log2)
Systematic	PrimaryAccession	Description	F9	H7	ECP
A_84_P787143	AA586288	28937 Lambda-PRL2 Arabidopsis thaliana cDNA clone 92L5XP 3', mRNA sequence [AA586288]		1.62391
A_84_P856262	AI994784	NM_180828 WR3 {Arabidopsis thaliana} (exp=-1; wgp=0; cg=0), partial (37%) [TC310366]	1.13234	1.28359	1.33468
A_84_P794137	AJ276737	Arabidopsis thaliana partial mRNA, clone DiDi 10A-2a [AJ276737]		1.13395
A_84_P795693	AK222207	Arabidopsis thaliana mRNA for hypothetical protein, complete cds, clone: RAFL25-11-N12 [AK222207]		-2.06445
A_84_P786217	AK226672	Arabidopsis thaliana mRNA for pectinesterase like protein, complete cds, clone: RAFL07-50-M01 [AK226672]	-1.7031
A_84_P796587	AK228504	Arabidopsis thaliana mRNA for hypothetical protein, complete cds, clone: RAFL15-15-H09 [AK228504]		1.98184
A_84_P803735	AK228663	Arabidopsis thaliana mRNA for hypothetical protein, complete cds, clone: RAFL16-01-O21 [AK228663]			1.9782
A_84_P731515	AK229427	Arabidopsis thaliana mRNA for putative cyclic nucleotide-regulated ion channel protein, complete cds, clone: RAFL16-72-D10 [AK229427]		1.13357
A_84_P789383	AK229890	Arabidopsis thaliana mRNA for hypothetical protein, complete cds, clone: RAFL22-20-D23 [AK229890]			1.801
A_84_P713101	AK230242	Arabidopsis thaliana mRNA for xyloglucan endotransglycosylase - like protein, complete cds, clone: RAFL23-12-F19 [AK230242]		-1.25137
A_84_P231009	AT1G01070	nodulin MtN21 family protein [AT1G01070.1]			-1.02481
A_84_P17366	AT1G01250	AP2 domain-containing transcription factor, putative [AT1G01250.1]		-1.61724
A_84_P816097	AT1G01360	similar to unknown protein [Arabidopsis thaliana] (TAIR:AT4G01026.1); similar to hypothetical protein [Arabidopsis suecica] (GB:BAF63139.1); contains domain SSF55961 (SSF55961) [AT1G01360.1]		-1.07726
A_84_P10396	AT1G01460	ATPIPK11; 1-phosphatidylinositol-4-phosphate 5-kinase [AT1G01460.1]		1.6808
A_84_P22852	AT1G01520	myb family transcription factor [AT1G01520.1]		-1.0777
A_84_P15122	AT1G01540	protein kinase family protein [AT1G01540.1]		-1.20344
A_84_P533719	AT1G01570	fringe-related protein [AT1G01570.1]	-1.29939	-1.13338
A_84_P17960	AT1G01580	FRO2 (FERRIC REDUCTION OXIDASE 2); ferric-chelate reductase [AT1G01580.1]		-1.10646
A_84_P805272	AT1G01620	PIP1C (PLASMA MEMBRANE INTRINSIC PROTEIN 1;3); water channel [AT1G01620.1]		-1.454
A_84_P11247	AT1G01660	U-box domain-containing protein [AT1G01660.1]		-1.20038
A_84_P15034	AT1G01790	KEA1 (K EFFLUX ANTIPORTER 1); potassium:hydrogen antiporter [AT1G01790.1]		-1.06873
A_84_P20862	AT1G02030	zinc finger (C2H2 type) family protein [AT1G02030.1]		1.76426
A_84_P275920	AT1G02065	SPL8 (SQUAMOSA PROMOTER BINDING PROTEIN-LIKE 8); DNA binding [AT1G02065.1]		4.71027
A_84_P788852	AT1G02070	similar to zinc ion binding [Arabidopsis thaliana] (TAIR:AT3G60520.1); similar to unknown [Populus trichocarpa] (GB:ABK95332.1) [AT1G02070.1]			1.49692
A_84_P868722	AT1G02090	FUS5 (FUSCA 5); MAP kinase kinase [AT1G02090.3]		1.11609
A_84_P847367	AT1G02205	CER1 (ECERIFERUM 1) [AT1G02205.1]	-1.71779
A_84_P17015	AT1G02340	HFR1 (LONG HYPOCOTYL IN FAR-RED); DNA binding / transcription factor [AT1G02340.1]		-1.05622
A_84_P17961	AT1G02350	protoporphyrinogen oxidase-related [AT1G02350.1]		-1.15859
A_84_P18907	AT1G02360	chitinase, putative [AT1G02360.1]		3.17056
A_84_P274650	AT1G02430	ATARFD1B (ADP-ribosylation factor D1B); GTP binding [AT1G02430.1]		3.28783
A_84_P24094	AT1G02440	ATARFD1A (ADP-ribosylation factor D1A); GTP binding [AT1G02440.1]		2.45212
A_84_P298474	AT1G02520	PGP11 (P-GLYCOPROTEIN 11); ATPase, coupled to transmembrane movement of substances [AT1G02520.1]		2.47369
A_84_P612806	AT1G02570	similar to unknown protein [Arabidopsis thaliana] (TAIR:AT2G47360.1); similar to unnamed protein product [Vitis vinifera] (GB:CAO40120.1) [AT1G02570.1]		3.52759
A_84_P249675	AT1G02700	similar to unknown protein [Arabidopsis thaliana] (TAIR:AT4G02140.1); similar to hypothetical protein [Vitis vinifera] (GB:CAN70483.1); similar to unnamed protein product [Vitis vinifera] (GB:CAO40074.1) [AT1G02700.1]		-1.39252
A_84_P17111	AT1G02820	late embryogenesis abundant 3 family protein / LEA3 family protein [AT1G02820.1]	-1.33651
A_84_P14250	AT1G03070	glutamate binding / [AT1G03070.1]		-1.97901
A_84_P21773	AT1G03630	POR C (PROTOCHLOROPHYLLIDE OXIDOREDUCTASE); NADPH dehydrogenase/ oxidoreductase/ protochlorophyllide reductase [AT1G03630.1]	-1.45086
A_84_P15153	AT1G03660	similar to ankyrin repeat family protein [Arabidopsis thaliana] (TAIR:AT1G03670.1); similar to unnamed protein product [Vitis vinifera] (GB:CAO23951.1); contains domain ANK REPEAT-CONTAINING (PTHR18958:SF80); contains domain ANKYRIN REPEAT-CONTAINING (PTHR18958) [AT1G03660.1]		1.40022
A_84_P13263	AT1G03710	cysteine protease inhibitor [AT1G03710.1]	-1.48078
A_84_P823929	AT1G03850	glutaredoxin family protein [AT1G03850.1]		2.38434
A_84_P19909	AT1G04180	flavin-containing monooxygenase family protein / FMO family protein [AT1G04180.1]		-2.49437
A_84_P21812	AT1G04240	SHY2 (SHORT HYPOCOTYL 2); transcription factor [AT1G04240.1]		-1.83406
A_84_P20866	AT1G04250	AXR3 (AUXIN RESISTANT 3); transcription factor [AT1G04250.1]		-1.4806
A_84_P11410	AT1G04370	ATERF14 (ETHYLENE-RESPONSIVE ELEMENT BINDING FACTOR 14); DNA binding / transcription factor [AT1G04370.1]			3.13817
A_84_P18219	AT1G04770	male sterility MS5 family protein [AT1G04770.1]		-1.03433
A_84_P17059	AT1G05190	EMB2394 (EMBRYO DEFECTIVE 2394); structural constituent of ribosome [AT1G05190.1]		-1.0581
A_84_P15168	AT1G05300	ZIP5 (ZINC TRANSPORTER 5 PRECURSOR); cation transmembrane transporter [AT1G05300.1]		1.33391
A_84_P14223	AT1G05310	pectinesterase family protein [AT1G05310.1]		-1.7429
A_84_P751853	AT1G05750	PDE247 (PIGMENT DEFECTIVE 247) [AT1G05750.1]	-1.13511	-1.33368
A_84_P303930	AT1G05800	lipase class 3 family protein [AT1G05800.1]	1.75861
A_84_P22273	AT1G05880	zinc ion binding [AT1G05880.1]		2.22055
A_84_P20410	AT1G06080	ADS1 (DELTA 9 DESATURASE 1); oxidoreductase [AT1G06080.1]	-4.20654		-3.8392
A_84_P753337	AT1G06148	other RNA [AT1G06148.1]		1.01202
A_84_P17577	AT1G06180	ATMYB13 (myb domain protein 13); DNA binding / transcription factor [AT1G06180.1]		1.28529
A_84_P592399	AT1G06380	ribosomal protein-related [AT1G06380.1]		1.07173
A_84_P15124	AT1G06420	unknown protein [AT1G06420.1]	-1.70669
A_84_P814968	AT1G06460	ACD32.1 (ALPHA-CRYSTALLIN DOMAIN 31.2) [AT1G06460.1]		-1.03887
A_84_P13942	AT1G06520	ATGPAT1/GPAT1 (GLYCEROL-3-PHOSPHATE ACYLTRANSFERASE 1); 1-acylglycerol-3-phosphate O-acyltransferase/ acyltransferase [AT1G06520.1]			2.08874
A_84_P22453	AT1G06540	similar to unknown protein [Arabidopsis thaliana] (TAIR:AT2G30930.1) [AT1G06540.1]		1.03302
A_84_P12050	AT1G06550	enoyl-CoA hydratase/isomerase family protein [AT1G06550.1]			1.05382
A_84_P751847	AT1G06645	pseudogene, similar to CmE8, blastp match of 51% identity and 3.9e-106 P-value to GP [AT1G06645.1]		-1.11427
A_84_P292314	AT1G06690	aldo/keto reductase family protein [AT1G06690.1]		-1.0873
A_84_P17191	AT1G07160	protein phosphatase 2C, putative / PP2C, putative [AT1G07160.1]			1.6341
A_84_P754636	AT1G07175	similar to unknown protein [Arabidopsis thaliana] (TAIR:AT2G29995.1) [AT1G07175.1]		2.94223	3.51885
A_84_P16245	AT1G07260	UDP-glucoronosyl/UDP-glucosyl transferase family protein [AT1G07260.1]		2.10509
A_84_P15440	AT1G07400	17.8 kDa class I heat shock protein (HSP17.8-CI) [AT1G07400.1]		1.47803
A_84_P13548	AT1G07430	protein phosphatase 2C, putative / PP2C, putative [AT1G07430.1]	-1.3166	-1.17513
A_84_P18275	AT1G07440	tropinone reductase, putative / tropine dehydrogenase, putative [AT1G07440.1]		-1.46743
A_84_P547061	AT1G07473	similar to unknown protein [Arabidopsis thaliana] (TAIR:AT1G07476.1) [AT1G07473.1]		1.42951
A_84_P18271	AT1G07500	unknown protein [AT1G07500.1]	-1.34122	-1.55687
A_84_P13539	AT1G07570	APK1A (Arabidopsis protein kinase 1A); kinase [AT1G07570.1]	1.01031
A_84_P17295	AT1G07630	PLL5 (POL-like 5); protein serine/threonine phosphatase [AT1G07630.1]		1.28214
A_84_P18237	AT1G07710	ankyrin repeat family protein [AT1G07710.1]		-1.62677
A_84_P829402	AT1G07795	similar to unknown protein [Arabidopsis thaliana] (TAIR:AT2G28725.1); similar to hypothetical protein [Vitis vinifera] (GB:CAN76818.1) [AT1G07795.1]		1.45693
A_84_P20121	AT1G07860	unknown protein [AT1G07860.1]		-1.76533
A_84_P810312	AT1G07890	APX1 (ASCORBATE PEROXIDASE 1); L-ascorbate peroxidase [AT1G07890.1]		1.178
A_84_P143569	AT1G08320	bZIP family transcription factor [AT1G08320.1]	1.7285
A_84_P298034	AT1G08500	plastocyanin-like domain-containing protein [AT1G08500.1]		-1.34635
A_84_P815236	AT1G08570	thioredoxin family protein [AT1G08570.3]		-1.1668
A_84_P17045	AT1G08630	THA1 (THREONINE ALDOLASE 1); aldehyde-lyase/ threonine aldolase [AT1G08630.1]		1.72516
A_84_P19883	AT1G08650	PPCK1 (PHOSPHOENOLPYRUVATE CARBOXYLASE KINASE); kinase [AT1G08650.1]	-1.13132	-1.00227
A_84_P148728	AT1G08980	ATAMI1 (AMIDASE-LIKE PROTEIN 1); amidase [AT1G08980.1]		-1.0837
A_84_P752675	AT1G09157	similar to unknown protein [Arabidopsis thaliana] (TAIR:AT5G39650.1); similar to 52O08_3 [Brassica rapa subsp. pekinensis] (GB:AAZ67548.1); contains InterPro domain Protein of unknown function DUF679 (InterPro:IPR007770) [AT1G09157.1]	-1.43395
A_84_P851072	AT1G09340	CRB; binding / catalytic/ coenzyme binding [AT1G09340.1]		-1.55078
A_84_P16114	AT1G09350	ATGOLS3 (ARABIDOPSIS THALIANA GALACTINOL SYNTHASE 3); transferase, transferring glycosyl groups / transferase, transferring hexosyl groups [AT1G09350.1]		-2.12101
A_84_P12334	AT1G09360	invertase/pectin methylesterase inhibitor family protein [AT1G09360.1]	-3.09662	-2.90817
A_84_P17060	AT1G09440	protein kinase family protein [AT1G09440.1]		-1.54938
A_84_P816073	AT1G09560	GLP5 (GERMIN-LIKE PROTEIN 5); manganese ion binding / metal ion binding / nutrient reservoir [AT1G09560.1]		1.3568	1.3886
A_84_P15162	AT1G09930	ATOPT2 (oligopeptide transporter 2); oligopeptide transporter [AT1G09930.1]	-1.17616	-1.48812
A_84_P273450	AT1G09935	phosphoglycerate/bisphosphoglycerate mutase family protein [AT1G09935.1]		2.39794
A_84_P14226	AT1G10070	ATBCAT-2; branched-chain-amino-acid transaminase/ catalytic [AT1G10070.1]		1.57097
A_84_P16120	AT1G10140	similar to unknown protein [Arabidopsis thaliana] (TAIR:AT1G58420.1); contains InterPro domain Uncharacterised conserved protein UCP031279 (InterPro:IPR016972) [AT1G10140.1]	1.02278	1.44036
A_84_P577248	AT1G10155	similar to ATPP2-A9 (Phloem protein 2-A9), carbohydrate binding [Arabidopsis thaliana] (TAIR:AT1G31200.1); similar to unknown [Populus trichocarpa x Populus deltoides] (GB:ABK96474.1) [AT1G10155.1]			1.55125
A_84_P611100	AT1G10220	similar to ZCF37 [Arabidopsis thaliana] (TAIR:AT1G59590.1) [AT1G10220.1]		2.12203	1.93644
A_84_P112622	AT1G10360	ATGSTU18 (GLUTATHIONE S-TRANSFERASE 29); glutathione transferase [AT1G10360.1]	-1.07823	-1.2307
A_84_P533782	AT1G10710	similar to unknown protein [Arabidopsis thaliana] (TAIR:AT1G10717.1); similar to unnamed protein product [Vitis vinifera] (GB:CAO16118.1); contains domain PH domain-like (SSF50729) [AT1G10710.1]	-1.02372
A_84_P291354	AT1G10990	unknown protein [AT1G10990.1]		1.61179
A_84_P10508	AT1G11100	SNF2 domain-containing protein / helicase domain-containing protein / zinc finger protein-related [AT1G11100.1]		1.30683
A_84_P10640	AT1G11220	similar to unknown protein [Arabidopsis thaliana] (TAIR:AT1G11230.1); similar to fiber expressed protein [Gossypium hirsutum] (GB:AAY85179.1); contains InterPro domain Protein of unknown function DUF761, plant (InterPro:IPR008480) [AT1G11220.1]	-1.11455
A_84_P10638	AT1G11260	STP1 (SUGAR TRANSPORTER 1); carbohydrate transmembrane transporter/ sugar:hydrogen ion symporter [AT1G11260.1]		1.30798
A_84_P751564	AT1G11595	pseudogene, putative glucose 6 phosphate/phosphate translocator, blastp match of 60% identity and 2.3e-78 P-value to GP [AT1G11595.1]		1.88699
A_84_P198594	AT1G11850	unknown protein [AT1G11850.1]			-2.89751
A_84_P839042	AT1G11925	Encodes a Stigma-specific Stig1 family protein [AT1G11925.1]	1.6582	1.7957
A_84_P22827	AT1G12210	RFL1 (RPS5-LIKE 1); ATP binding / protein binding [AT1G12210.1]		1.00174
A_84_P14712	AT1G12250	thylakoid lumenal protein-related [AT1G12250.1]		-1.1026
A_84_P821788	AT1G12450	similar to unknown protein [Arabidopsis thaliana] (TAIR:AT4G22850.1); similar to unnamed protein product [Vitis vinifera] (GB:CAO63604.1); contains InterPro domain SNARE associated Golgi protein (InterPro:IPR015414) [AT1G12450.1]		-1.06427
A_84_P16247	AT1G12610	DDF1 (DWARF AND DELAYED FLOWERING 1); DNA binding / transcription factor [AT1G12610.1]	-1.32712	-1.11556
A_84_P15540	AT1G12900	GAPA-2; glyceraldehyde-3-phosphate dehydrogenase [AT1G12900.1]		-1.25638
A_84_P12368	AT1G13100	CYP71B29 (cytochrome P450, family 71, subfamily B, polypeptide 29); oxygen binding [AT1G13100.1]		1.46459
A_84_P13313	AT1G13110	CYP71B7 (cytochrome P450, family 71, subfamily B, polypeptide 7); oxygen binding [AT1G13110.1]		1.8978
A_84_P548849	AT1G13480	similar to unknown protein [Arabidopsis thaliana] (TAIR:AT1G13520.1); similar to unnamed protein product [Vitis vinifera] (GB:CAO42040.1); contains InterPro domain Protein of unknown function DUF1262 (InterPro:IPR010683) [AT1G13480.1]		2.46481
A_84_P213008	AT1G13520	similar to unknown protein [Arabidopsis thaliana] (TAIR:AT1G13480.1); similar to unnamed protein product [Vitis vinifera] (GB:CAO42040.1); contains InterPro domain Protein of unknown function DUF1262 (InterPro:IPR010683) [AT1G13520.1]		2.3038
A_84_P588837	AT1G13530	similar to unknown protein [Arabidopsis thaliana] (TAIR:AT1G13500.1); similar to unnamed protein product [Vitis vinifera] (GB:CAO42040.1); contains InterPro domain Protein of unknown function DUF1262 (InterPro:IPR010683) [AT1G13530.1]		1.97108
A_84_P582608	AT1G13540	similar to unknown protein [Arabidopsis thaliana] (TAIR:AT1G13510.1); similar to unnamed protein product [Vitis vinifera] (GB:CAO42040.1); contains InterPro domain Protein of unknown function DUF1262 (InterPro:IPR010683) [AT1G13540.1]		2.56111
A_84_P569232	AT1G13550	similar to unknown protein [Arabidopsis thaliana] (TAIR:AT1G13480.1); similar to unnamed protein product [Vitis vinifera] (GB:CAO42040.1); contains InterPro domain Protein of unknown function DUF1262 (InterPro:IPR010683) [AT1G13550.1]		2.63743
A_84_P22860	AT1G13590	ATPSK1 (PHYTOSULFOKINE 1 PRECURSOR); growth factor [AT1G13590.1]	2.90167	3.47106	4.51725
A_84_P12447	AT1G13820	hydrolase, alpha/beta fold family protein [AT1G13820.1]		-1.26005
A_84_P299330	AT1G13930	similar to nodulin-related [Arabidopsis thaliana] (TAIR:AT2G03440.1); similar to hypothetical protein [Vitis vinifera] (GB:CAN63832.1) [AT1G13930.1]		-1.1834
A_84_P15207	AT1G14120	2-oxoglutarate-dependent dioxygenase, putative [AT1G14120.1]		2.14324
A_84_P18991	AT1G14150	oxygen evolving enhancer 3 (PsbQ) family protein [AT1G14150.1]		-1.85572
A_84_P310443	AT1G14260	zinc finger (C3HC4-type RING finger) family protein [AT1G14260.1]		1.25936
A_84_P20048	AT1G14345	oxidoreductase [AT1G14345.1]		-1.1642
A_84_P821467	AT1G14520	MIOX1 (MYO-INISITOL OXYGENASE); oxidoreductase [AT1G14520.1]		-1.07386
A_84_P11500	AT1G14640	SWAP (Suppressor-of-White-APricot)/surp domain-containing protein [AT1G14640.1]		1.38541
A_84_P11475	AT1G14700	ATPAP3/PAP3 (purple acid phosphatase 3); acid phosphatase/ protein serine/threonine phosphatase [AT1G14700.1]		-1.8479
A_84_P788741	AT1G14750	SDS (SOLO DANCERS) [AT1G14750.2]			2.69371
A_84_P14273	AT1G14780	similar to unknown protein [Arabidopsis thaliana] (TAIR:AT4G24290.2); similar to unnamed protein product [Vitis vinifera] (GB:CAO42380.1); contains InterPro domain Membrane attack complex component/perforin/complement C9 (InterPro:IPR001862) [AT1G14780.1]	-1.16061	-1.27203
A_84_P12389	AT1G14860	ATNUDT18 (Arabidopsis thaliana Nudix hydrolase homolog 18); hydrolase [AT1G14860.1]	1.42655	2.06808
A_84_P82539	AT1G14870	Identical to Uncharacterized protein At1g14870 [Arabidopsis Thaliana] (GB:Q9LQU4); similar to unknown protein [Arabidopsis thaliana] (TAIR:AT5G35525.1); similar to unnamed protein product [Vitis vinifera] (GB:CAO42338.1); contains InterPro domain Aspartic acid and asparagine hydroxylation site (InterPro:IPR000152); contains InterPro domain Protein of unknown function Cys-rich (InterPro:IPR006461)…	1.41139	1.74803
A_84_P754620	AT1G15015	Identical to Putative F-box protein At1g15015 [Arabidopsis Thaliana] (GB:Q9M9Q4); similar to F-box protein-related / SLF-related [Arabidopsis thaliana] (TAIR:AT5G10340.1); contains InterPro domain Cyclin-like F-box (InterPro:IPR001810) [AT1G15015.1]	-1.57139
A_84_P818172	AT1G15040	glutamine amidotransferase-related [AT1G15040.1]	3.75544	7.5266
A_84_P550623	AT1G15190	Identical to Fasciclin-like arabinogalactan protein 19 precursor (FLA19) [Arabidopsis Thaliana] (GB:Q5Q0H2;GB:Q9XI50); contains InterPro domain Beta-Ig-H3/fasciclin (InterPro:IPR000782) [AT1G15190.1]		1.34318
A_84_P10483	AT1G15260	similar to unknown protein [Arabidopsis thaliana] (TAIR:AT3G16070.1) [AT1G15260.1]	-1.18294
A_84_P21831	AT1G15380	lactoylglutathione lyase family protein / glyoxalase I family protein [AT1G15380.1]		3.40794
A_84_P571918	AT1G15385	unknown protein [AT1G15385.1]		2.90785
A_84_P13220	AT1G15420	similar to unnamed protein product [Vitis vinifera] (GB:CAO46050.1); contains InterPro domain Protein of unknown function NUC189, C-terminal (InterPro:IPR012979) [AT1G15420.1]		1.21072
A_84_P11446	AT1G15520	ATPDR12/PDR12 (PLEIOTROPIC DRUG RESISTANCE 12); ATPase, coupled to transmembrane movement of substances [AT1G15520.1]		2.03936
A_84_P14281	AT1G15550	GA4 (GA REQUIRING 4); gibberellin 3-beta-dioxygenase [AT1G15550.1]	-2.0641
A_84_P854414	AT1G15670	kelch repeat-containing F-box family protein [AT1G15670.1]	1.1402
A_84_P199774	AT1G15980	similar to unnamed protein product [Vitis vinifera] (GB:CAO49411.1); contains domain G3DSA:3.40.50.2000 (G3DSA:3.40.50.2000); contains domain SSF53756 (SSF53756) [AT1G15980.1]		-1.95224
A_84_P17116	AT1G16150	WAKL4 (WALL ASSOCIATED KINASE-LIKE 4); kinase [AT1G16150.1]			2.52233
A_84_P254700	AT1G16500	similar to unknown protein [Arabidopsis thaliana] (TAIR:AT1G79160.1); similar to unnamed protein product [Vitis vinifera] (GB:CAO47911.1) [AT1G16500.1]		1.43211
A_84_P842278	AT1G16720	HCF173 (HIGH CHLOROPHYLL FLUORESCENCE PHENOTYPE 173); binding / catalytic/ oxidoreductase/ transcription repressor [AT1G16720.1]		-1.2354
A_84_P566577	AT1G16730	similar to unknown [Picea sitchensis] (GB:ABK21208.1) [AT1G16730.1]		-1.04574
A_84_P567467	AT1G16830	pentatricopeptide (PPR) repeat-containing protein [AT1G16830.1]		1.07155
A_84_P581722	AT1G16960	similar to unknown protein [Arabidopsis thaliana] (TAIR:AT1G53400.1); similar to unknown [Brassica rapa] (GB:ABL97984.1); contains domain PTHR13609 (PTHR13609) [AT1G16960.1]		-1.24072
A_84_P831211	AT1G17060	CYP72C1 (cytochrome P450, family 72, subfamily C, polypeptide 1); oxygen binding [AT1G17060.1]		1.0602
A_84_P793001	AT1G17420	LOX3 (Lipoxygenase 3); iron ion binding / lipoxygenase/ metal ion binding / oxidoreductase, acting on single donors with incorporation of molecular oxygen, incorporation of two atoms of oxygen [AT1G17420.1]	1.02576
A_84_P11332	AT1G17615	disease resistance protein (TIR-NBS class), putative [AT1G17615.1]		1.68736
A_84_P21746	AT1G17710	phosphoric monoester hydrolase [AT1G17710.1]	1.83211		1.98384
A_84_P14344	AT1G17860	trypsin and protease inhibitor family protein / Kunitz family protein [AT1G17860.1]		1.4238	1.5483
A_84_P15294	AT1G17920	HDG12 (HOMEODOMAIN GLABROUS12); transcription factor [AT1G17920.1]	-1.63442
A_84_P828652	AT1G17940	similar to unknown protein [Arabidopsis thaliana] (TAIR:AT1G73390.2); similar to unknown protein [Arabidopsis thaliana] (TAIR:AT1G73390.1); similar to unknown protein [Arabidopsis thaliana] (TAIR:AT1G73390.3); similar to unnamed protein product [Vitis vinifera] (GB:CAO62047.1); contains InterPro domain BRO1 (InterPro:IPR004328) [AT1G17940.1]		-1.00908
A_84_P20965	AT1G17970	zinc finger (C3HC4-type RING finger) family protein [AT1G17970.1]		-1.59441
A_84_P822956	AT1G18060	similar to unnamed protein product [Vitis vinifera] (GB:CAO68142.1) [AT1G18060.1]		-1.7706
A_84_P12073	AT1G18290	similar to unknown [Populus trichocarpa] (GB:ABK94840.1) [AT1G18290.1]	2.34322	1.32816	2.46309
A_84_P16799	AT1G18300	ATNUDT4 (Arabidopsis thaliana Nudix hydrolase homolog 4); hydrolase [AT1G18300.1]			1.17615
A_84_P13013	AT1G18380	Identical to Uncharacterized protein At1g18380 precursor [Arabidopsis Thaliana] (GB:Q5BQ05;GB:Q5Q0G6;GB:Q8RX30;GB:Q9LPQ6); similar to unknown protein [Arabidopsis thaliana] (TAIR:AT1G67025.1); similar to unnamed protein product [Vitis vinifera] (GB:CAO68096.1) [AT1G18380.1]		1.0905
A_84_P13407	AT1G18590	sulfotransferase family protein [AT1G18590.1]		1.18945
A_84_P16236	AT1G18650	glycosyl hydrolase family protein 17 [AT1G18650.1]	-1.26338
A_84_P256080	AT1G18730	similar to unknown [Populus trichocarpa] (GB:ABK95263.1) [AT1G18730.1]		-1.31662
A_84_P753050	AT1G18835	MIF3 (MINI ZINC FINGER) [AT1G18835.1]	1.4534	1.6035	1.64582
A_84_P11448	AT1G18870	ICS2; isochorismate synthase [AT1G18870.1]		-2.16157
A_84_P788710	AT1G19030	transposable element gene [AT1G19030.1]		1.54739
A_84_P10395	AT1G19050	ARR7 (RESPONSE REGULATOR 7); transcription regulator/ two-component response regulator [AT1G19050.1]		-1.67548	-1.38751
A_84_P16240	AT1G19150	LHCA6 (Photosystem I light harvesting complex gene 6); chlorophyll binding [AT1G19150.1]		-2.03388
A_84_P13909	AT1G19320	pathogenesis-related thaumatin family protein [AT1G19320.1]		-2.33434	-1.32907
A_84_P10129	AT1G19330	similar to unknown protein [Arabidopsis thaliana] (TAIR:AT1G75060.1); similar to unnamed protein product [Vitis vinifera] (GB:CAO61216.1) [AT1G19330.1]		-1.27887
A_84_P16748	AT1G19350	BES1 (BRI1-EMS-SUPPRESSOR 1); transcription regulator [AT1G19350.1]		-1.1045
A_84_P13913	AT1G19380	similar to unknown protein [Arabidopsis thaliana] (TAIR:AT5G65650.1); similar to unknown [Vitis pseudoreticulata] (GB:ABC69762.1); similar to unnamed protein product [Vitis vinifera] (GB:CAO61173.1); contains InterPro domain Protein of unknown function DUF1195 (InterPro:IPR010608) [AT1G19380.1]		1.14168
A_84_P19591	AT1G19450	integral membrane protein, putative / sugar transporter family protein [AT1G19450.1]		-1.08412
A_84_P199304	AT1G19610	LCR78/PDF1.4 (Low-molecular-weight cysteine-rich 78) [AT1G19610.1]	1.53974
A_84_P829392	AT1G19990	similar to unknown protein [Arabidopsis thaliana] (TAIR:AT5G11600.1); similar to unknown [Populus trichocarpa] (GB:ABK92449.1) [AT1G19990.1]		1.20462
A_84_P20031	AT1G20020	ATLFNR2 (LEAF FNR 2); NADPH dehydrogenase/ oxidoreductase/ poly(U) binding [AT1G20020.1]		-1.26493
A_84_P23814	AT1G20030	pathogenesis-related thaumatin family protein [AT1G20030.1]		-1.13305
A_84_P22866	AT1G20070	unknown protein [AT1G20070.1]		-1.55748
A_84_P752246	AT1G20130	lipase [AT1G20130.1]		4.26806
A_84_P18132	AT1G20180	Identical to UPF0496 protein At1g20180 [Arabidopsis Thaliana] (GB:Q6DYE5;GB:Q5BQ01;GB:Q9LNU2); similar to unknown protein [Arabidopsis thaliana] (TAIR:AT3G49070.1); similar to unnamed protein product [Vitis vinifera] (GB:CAO60936.1); contains InterPro domain Protein of unknown function DUF677 (InterPro:IPR007749) [AT1G20180.1]	-1.50036
A_84_P21915	AT1G20190	ATEXPA11 (ARABIDOPSIS THALIANA EXPANSIN A11) [AT1G20190.1]		-2.77772
A_84_P16242	AT1G20300	pentatricopeptide (PPR) repeat-containing protein [AT1G20300.1]		1.38631
A_84_P181974	AT1G20310	similar to unknown protein [Arabidopsis thaliana] (TAIR:AT1G76070.1); similar to hypothetical protein [Vitis vinifera] (GB:CAN83887.1) [AT1G20310.1]		1.01043
A_84_P17009	AT1G20823	zinc finger (C3HC4-type RING finger) family protein [AT1G20823.1]		-1.91573
A_84_P502754	AT1G20925	auxin efflux carrier family protein [AT1G20925.1]		-1.08253
A_84_P524941	AT1G21320	nucleic acid binding / nucleotide binding [AT1G21320.1]		2.37065
A_84_P209848	AT1G21460	nodulin MtN3 family protein [AT1G21460.1]		-1.30606
A_84_P16577	AT1G21520	unknown protein [AT1G21520.1]		-1.13972
A_84_P21308	AT1G21550	calcium-binding protein, putative [AT1G21550.1]	1.14975
A_84_P19519	AT1G21790	similar to unnamed protein product [Vitis vinifera] (GB:CAO61872.1); contains InterPro domain TRAM, LAG1 and CLN8 homology; (InterPro:IPR006634) [AT1G21790.1]		-1.64756
A_84_P20470	AT1G21910	AP2 domain-containing transcription factor family protein [AT1G21910.1]		-2.37878
A_84_P841077	AT1G22160	senescence-associated protein-related [AT1G22160.1]		-1.47869
A_84_P19082	AT1G22190	AP2 domain-containing transcription factor, putative [AT1G22190.1]		-1.168
A_84_P751348	AT1G22370	ATUGT85A5 (UDP-GLUCOSYL TRANSFERASE 85A5); transferase, transferring glycosyl groups [AT1G22370.1]		-1.19262
A_84_P831849	AT1G22410	2-dehydro-3-deoxyphosphoheptonate aldolase, putative / 3-deoxy-D-arabino-heptulosonate 7-phosphate synthase, putative / DAHP synthetase, putative [AT1G22410.1]	1.19595	1.30574
A_84_P158205	AT1G22470	similar to unknown protein [Arabidopsis thaliana] (TAIR:AT1G72240.1) [AT1G22470.1]		-1.26565
A_84_P750837	AT1G22590	AGL87; transcription factor [AT1G22590.1]		-1.66735
A_84_P846989	AT1G22630	heat shock protein binding / unfolded protein binding [AT1G22630.1]		-1.08404
A_84_P13295	AT1G22650	beta-fructofuranosidase, putative / invertase, putative / saccharase, putative / beta-fructosidase, putative [AT1G22650.1]		1.48687	1.27641
A_84_P22724	AT1G22900	similar to disease resistance-responsive family protein [Arabidopsis thaliana] (TAIR:AT5G42500.1); similar to unnamed protein product [Vitis vinifera] (GB:CAO23438.1); similar to hypothetical protein [Vitis vinifera] (GB:CAN61168.1); contains InterPro domain Plant disease resistance response protein (InterPro:IPR004265) [AT1G22900.1]	2.03509	2.00556	1.76776
A_84_P15157	AT1G22950	oxidoreductase, acting on paired donors, with incorporation or reduction of molecular oxygen, 2-oxoglutarate as one donor, and incorporation of one atom each of oxygen into both donors [AT1G22950.1]		1.00747
A_84_P14212	AT1G22990	heavy-metal-associated domain-containing protein / copper chaperone (CCH)-related [AT1G22990.1]	-1.9743
A_84_P824548	AT1G23410	ubiquitin extension protein, putative / 40S ribosomal protein S27A (RPS27aA) [AT1G23410.1]		1.04878
A_84_P17024	AT1G23460	polygalacturonase [AT1G23460.1]		-1.0865
A_84_P23647	AT1G23510	similar to unknown protein [Arabidopsis thaliana] (TAIR:AT1G23520.1); similar to hypothetical protein [Oryza sativa (japonica cultivar-group)] (GB:BAD23602.1); contains InterPro domain Protein of unknown function DUF220 (InterPro:IPR003863) [AT1G23510.1]		2.459
A_84_P22699	AT1G23540	protein kinase family protein [AT1G23540.1]	-1.4265
A_84_P10406	AT1G23560	similar to unknown protein [Arabidopsis thaliana] (TAIR:AT1G70480.2); similar to unknown protein [Arabidopsis thaliana] (TAIR:AT1G70480.1); similar to unnamed protein product [Vitis vinifera] (GB:CAO66084.1); contains InterPro domain Protein of unknown function DUF220 (InterPro:IPR003863) [AT1G23560.1]	1.18986	1.41244
A_84_P848231	AT1G23740	oxidoreductase, zinc-binding dehydrogenase family protein [AT1G23740.1]		-1.3869
A_84_P14672	AT1G23850	similar to unknown protein [Arabidopsis thaliana] (TAIR:AT1G23840.1); similar to hypothetical protein [Vitis vinifera] (GB:CAN74577.1) [AT1G23850.1]		1.39988
A_84_P795998	AT1G24020	MLP423 (MLP-LIKE PROTEIN 423) [AT1G24020.1]	-2.7685		-2.75111
A_84_P17520	AT1G24070	ATCSLA10 (Cellulose synthase-like A10); transferase, transferring glycosyl groups [AT1G24070.1]		-1.00174
A_84_P524952	AT1G25240	epsin N-terminal homology (ENTH) domain-containing protein / clathrin assembly protein-related [AT1G25240.1]		-1.33814
A_84_P10572	AT1G25390	protein kinase family protein [AT1G25390.1]			1.26399
A_84_P149828	AT1G25510	aspartyl protease family protein [AT1G25510.1]	-1.01682
A_84_P799245	AT1G26220	GCN5-related N-acetyltransferase (GNAT) family protein [AT1G26220.1]		-1.10507
A_84_P19294	AT1G26380	FAD-binding domain-containing protein [AT1G26380.1]		1.67972
A_84_P12674	AT1G26400	FAD-binding domain-containing protein [AT1G26400.1]		2.88018	3.73206
A_84_P16454	AT1G26410	FAD-binding domain-containing protein [AT1G26410.1]		2.07353
A_84_P20237	AT1G26420	FAD-binding domain-containing protein [AT1G26420.1]		1.47054
A_84_P243235	AT1G26600	CLE9 (CLAVATA3/ESR-RELATED 9); receptor binding [AT1G26600.1]		-1.28819
A_84_P15526	AT1G26710	similar to unknown protein [Arabidopsis thaliana] (TAIR:AT1G26720.1) [AT1G26710.1]			1.63689
A_84_P12696	AT1G26790	Dof-type zinc finger domain-containing protein [AT1G26790.1]		-2.3102	-1.89578
A_84_P20802	AT1G27200	similar to unknown protein [Arabidopsis thaliana] (TAIR:AT5G40720.1); similar to unknown [Populus trichocarpa] (GB:ABK95005.1); contains InterPro domain Protein of unknown function DUF23 (InterPro:IPR008166) [AT1G27200.1]		-1.7249
A_84_P115172	AT1G27380	RIC2 (ROP-INTERACTIVE CRIB MOTIF-CONTAINING PROTEIN 2) [AT1G27380.1]		-1.29772
A_84_P20849	AT1G27480	lecithin:cholesterol acyltransferase family protein / LACT family protein [AT1G27480.1]	-1.92637	-1.65708
A_84_P12249	AT1G28010	PGP14 (P-GLYCOPROTEIN 14); ATPase, coupled to transmembrane movement of substances [AT1G28010.1]			1.1202
A_84_P16032	AT1G28040	protein binding / zinc ion binding [AT1G28040.1]		1.61001
A_84_P801378	AT1G28230	PUP1 (PURINE PERMEASE 1); purine transmembrane transporter [AT1G28230.1]		-1.32
A_84_P23823	AT1G28360	ATERF12/ERF12 (ERF domain protein 12); DNA binding / transcription factor/ transcription repressor [AT1G28360.1]		1.80391
A_84_P579082	AT1G28375	unknown protein [AT1G28375.1]		1.74981
A_84_P852475	AT1G28390	protein kinase family protein [AT1G28390.1]	1.50617	1.71897
A_84_P812834	AT1G28480	GRX480; thiol-disulfide exchange intermediate [AT1G28480.1]		1.22731
A_84_P200014	AT1G28660	lipase, putative [AT1G28660.1]			1.48464
A_84_P785123	AT1G28680	transferase family protein [AT1G28680.1]		1.1999
A_84_P752242	AT1G29190	pseudogene, hypothetical protein [AT1G29190.1]	1.00875
A_84_P23274	AT1G29290	similar to hypothetical protein [Vitis vinifera] (GB:CAN69942.1) [AT1G29290.1]		1.03248
A_84_P219948	AT1G29390	COR314-TM2 (cold regulated 314 thylakoid membrane 2) [AT1G29390.1]		-1.17385
A_84_P753711	AT1G29418	unknown protein [AT1G29418.1]		1.15404
A_84_P537376	AT1G29420	similar to SAUR68 (SMALL AUXIN UPREGULATED 68) [Arabidopsis thaliana] (TAIR:AT1G29510.1); similar to auxin-responsive protein [Brassica rapa] (GB:ABV89665.1); contains InterPro domain Auxin responsive SAUR protein (InterPro:IPR003676) [AT1G29420.1]		-2.70272
A_84_P10257	AT1G29430	auxin-responsive family protein [AT1G29430.1]		-1.94655
A_84_P182224	AT1G29700	similar to unnamed protein product [Vitis vinifera] (GB:CAO42101.1); contains domain SSF56281 (SSF56281) [AT1G29700.1]		-1.5146
A_84_P750540	AT1G29715	pseudogene, putative receptor-related serine/threonine kinase, blastp match of 67% identity and 2.6e-98 P-value to GP [AT1G29715.1]		1.70222
A_84_P210788	AT1G29920	CAB2 (Chlorophyll a/b-binding protein 2); chlorophyll binding [AT1G29920.1]		-1.74794
A_84_P22822	AT1G30110	diadenosine 5',5'''-P1,P4-tetraphosphate hydrolase, putative [AT1G30110.1]		1.29146	1.29436
A_84_P595141	AT1G30135	JAZ8/TIFY5A (JASMONATE-ZIM-DOMAIN PROTEIN 8) [AT1G30135.1]		1.8384
A_84_P555983	AT1G30190	similar to unknown protein [Arabidopsis thaliana] (TAIR:AT2G34610.1) [AT1G30190.1]	-1.18585	-1.69005
A_84_P10404	AT1G30455	protein binding / transcription activator/ transcription regulator/ translation initiation factor/ zinc ion binding [AT1G30455.1]		1.11966
A_84_P16138	AT1G30700	FAD-binding domain-containing protein [AT1G30700.1]	2.74381	2.81862	3.06922
A_84_P18030	AT1G30720	FAD-binding domain-containing protein [AT1G30720.1]		2.34076	2.95216
A_84_P18976	AT1G30730	FAD-binding domain-containing protein [AT1G30730.1]	1.69056	1.46481	2.51895
A_84_P20868	AT1G30740	FAD-binding domain-containing protein [AT1G30740.1]		2.20361
A_84_P837705	AT1G30780	F-box family protein [AT1G30780.1]			2.46678
A_84_P753286	AT1G31173	MIR167D; miRNA [AT1G31173.1]		-1.89862	-1.05024
A_84_P821141	AT1G31190	inositol monophosphatase family protein [AT1G31190.1]		-1.05495
A_84_P15840	AT1G31290	PAZ domain-containing protein / piwi domain-containing protein [AT1G31290.1]	-1.0825
A_84_P15318	AT1G31800	CYP97A3/LUT5 (CYTOCHROME P450-TYPE MONOOXYGENASE 97A3); carotene beta-ring hydroxylase/ oxygen binding [AT1G31800.1]		-1.33182
A_84_P591591	AT1G31835	unknown protein [AT1G31835.1]		1.73222
A_84_P868344	AT1G31930	XLG3 (EXTRA-LARGE GTP-BINDING PROTEIN 3); signal transducer [AT1G31930.1]		1.5474	1.39301
A_84_P754430	AT1G32049	unknown pseudogene [AT1G32049.1]		1.5085
A_84_P18150	AT1G32060	PRK (PHOSPHORIBULOKINASE); ATP binding / phosphoribulokinase/ protein binding [AT1G32060.1]		-1.36989
A_84_P136215	AT1G32080	membrane protein, putative [AT1G32080.1]		-1.55094
A_84_P10596	AT1G32120	similar to unknown protein [Arabidopsis thaliana] (TAIR:AT4G16050.1); similar to unknown protein [Arabidopsis thaliana] (TAIR:AT1G51538.1); similar to unnamed protein product [Vitis vinifera] (GB:CAO49973.1); similar to hypothetical protein [Vitis vinifera] (GB:CAN68559.1); contains InterPro domain Protein of unknown function DUF716 (InterPro:IPR006904); contains InterPro domain Protein of unknow…		1.15546
A_84_P21943	AT1G32170	XTR4 (XYLOGLUCAN ENDOTRANSGLYCOSYLASE 4); hydrolase, acting on glycosyl bonds [AT1G32170.1]		1.07107
A_84_P797717	AT1G32361	ATL1F; protein binding / zinc ion binding [AT1G32361.1]			3.00428
A_84_P11949	AT1G32470	glycine cleavage system H protein, mitochondrial, putative [AT1G32470.1]		-1.43945
A_84_P715787	AT1G32928	similar to unknown protein [Arabidopsis thaliana] (TAIR:AT1G32920.1) [AT1G32928.1]		1.03079
A_84_P841696	AT1G33170	dehydration-responsive family protein [AT1G33170.1]	-2.8398		-2.8172
A_84_P819038	AT1G33240	AT-GTL1 (Arabidopsis thaliana GT2-like 1); transcription factor [AT1G33240.1]		-1.20761
A_84_P19069	AT1G33390	helicase domain-containing protein [AT1G33390.1]		1.2723
A_84_P751709	AT1G33480	protein binding / zinc ion binding [AT1G33480.1]		-1.46322
A_84_P10598	AT1G33600	leucine-rich repeat family protein [AT1G33600.1]		2.04849
A_84_P828366	AT1G33610	leucine-rich repeat family protein [AT1G33610.1]		1.39228
A_84_P10402	AT1G33670	leucine-rich repeat family protein [AT1G33670.1]		2.25475
A_84_P18908	AT1G33760	AP2 domain-containing transcription factor, putative [AT1G33760.1]	-1.87138	-1.64196	-1.85179
A_84_P97876	AT1G33860	unknown protein [AT1G33860.1]			1.1068
A_84_P10523	AT1G34040	alliinase family protein [AT1G34040.1]		-1.54845
A_84_P23603	AT1G34060	alliinase family protein [AT1G34060.1]		-3.14938
A_84_P20998	AT1G35140	PHI-1 (PHOSPHATE-INDUCED 1) [AT1G35140.1]		-1.91068
A_84_P23829	AT1G35420	dienelactone hydrolase family protein [AT1G35420.1]		-1.25034
A_84_P24079	AT1G35730	APUM9 (ARABIDOPSIS PUMILIO 9); RNA binding [AT1G35730.1]		2.29514
A_84_P14249	AT1G36060	AP2 domain-containing transcription factor, putative [AT1G36060.1]	1.26559
A_84_P737368	AT1G36622	similar to unknown protein [Arabidopsis thaliana] (TAIR:AT1G36640.1) [AT1G36622.1]		1.04891	1.30221
A_84_P750427	AT1G36630	transposable element gene [AT1G36630.1]		1.38456
A_84_P750060	AT1G36680	transposable element gene [AT1G36680.1]		-1.64229
A_84_P15458	AT1G41830	SKS6 (SKU5 Similar 6); pectinesterase [AT1G41830.1]		-1.7149
A_84_P750801	AT1G42490	pseudogene, glutamate dehydrogenase (fragment), blastp match of 78% identity and 1.6e-94 P-value to GP [AT1G42490.1]		2.83846
A_84_P811397	AT1G42970	GAPB (GLYCERALDEHYDE-3-PHOSPHATE DEHYDROGENASE B SUBUNIT); glyceraldehyde-3-phosphate dehydrogenase [AT1G42970.1]		-1.17247
A_84_P11288	AT1G43000	zinc-binding family protein [AT1G43000.1]	-1.07183
A_84_P752369	AT1G43675	transposable element gene [AT1G43675.1]		1.2134
A_84_P750433	AT1G44150	pseudogene, hypothetical protein [AT1G44150.1]		-1.4617
A_84_P307130	AT1G44575	NPQ4 (NONPHOTOCHEMICAL QUENCHING) [AT1G44575.1]		-1.13725
A_84_P750979	AT1G44940	pseudogene, putative H+-ATPase, blastp match of 60% identity and 7.2e-14 P-value to GP [AT1G44940.1]		1.78968
A_84_P507242	AT1G45201	similar to triacylglycerol lipase [Arabidopsis thaliana] (TAIR:AT5G42930.1); similar to lipase class 3 family protein [Arabidopsis thaliana] (TAIR:AT5G67050.1); similar to unnamed protein product [Vitis vinifera] (GB:CAO61357.1); contains InterPro domain Lipase, class 3; (InterPro:IPR002921) [AT1G45201.1]		-1.2223
A_84_P752549	AT1G45474	LHCA5 (Photosystem I light harvesting complex gene 5) [AT1G45474.2]		-1.17196
A_84_P754167	AT1G46554	other RNA [AT1G46554.1]		-1.09578
A_84_P786987	AT1G46768	RAP2.1 (related to AP2 1); DNA binding / transcription factor [AT1G46768.1]	-1.1174	-1.05953
A_84_P842568	AT1G47370	Toll-Interleukin-Resistance (TIR) domain-containing protein [AT1G47370.1]			1.37971
A_84_P751472	AT1G47460	pseudogene, putative S-locus-specific glyco protein SLR1 precursor, similar to S-locus-specific glycoprotein SLR1 precursor GB:S20489 GI:99660 from (Arabidopsis thaliana); blastp match of 55% identity and 1.4e-28 P-value to GP [AT1G47460.1]			2.13329
A_84_P19697	AT1G47890	disease resistance family protein [AT1G47890.1]		2.13916
A_84_P750226	AT1G47950	transposable element gene [AT1G47950.1]		-1.31248
A_84_P785871	AT1G47960	C/VIF1 (CELL WALL / VACUOLAR INHIBITOR OF FRUCTOSIDASE 1); pectinesterase inhibitor [AT1G47960.1]	-1.42322	-1.60117
A_84_P11283	AT1G47980	similar to unknown protein [Arabidopsis thaliana] (TAIR:AT3G62730.1); similar to unnamed protein product [Vitis vinifera] (GB:CAO44946.1) [AT1G47980.1]	-1.35542
A_84_P19573	AT1G48100	glycoside hydrolase family 28 protein / polygalacturonase (pectinase) family protein [AT1G48100.1]		-1.96829
A_84_P264160	AT1G48300	similar to hypothetical protein [Vitis vinifera] (GB:CAN81152.1); contains InterPro domain Thioredoxin-like fold (InterPro:IPR012336) [AT1G48300.1]		-1.16567
A_84_P797922	AT1G48360	similar to unnamed protein product [Vitis vinifera] (GB:CAO45274.1); similar to Os06g0171800 [Oryza sativa (japonica cultivar-group)] (GB:NP_001056937.1); contains InterPro domain HIRAN (InterPro:IPR014905); contains InterPro domain VRR-NUC (InterPro:IPR014883) [AT1G48360.2]		-1.08623
A_84_P840800	AT1G48500	JAZ4/TIFY6A (JASMONATE-ZIM-DOMAIN PROTEIN 4) [AT1G48500.1]		-1.10062
A_84_P23161	AT1G48600	phosphoethanolamine N-methyltransferase 2, putative (NMT2) [AT1G48600.1]		-1.09139
A_84_P533868	AT1G49000	similar to unknown protein [Arabidopsis thaliana] (TAIR:AT3G18560.1); similar to hypothetical protein [Vitis vinifera] (GB:CAN78728.1); similar to unnamed protein product [Vitis vinifera] (GB:CAO68009.1) [AT1G49000.1]			1.47433
A_84_P586272	AT1G49150	unknown protein [AT1G49150.1]		1.90382
A_84_P16258	AT1G49230	zinc finger (C3HC4-type RING finger) family protein [AT1G49230.1]		-2.29254
A_84_P185004	AT1G49380	cytochrome c biogenesis protein family [AT1G49380.1]		-1.26089
A_84_P126091	AT1G49430	LACS2 (LONG-CHAIN ACYL-COA SYNTHETASE 2) [AT1G49430.1]			1.11492
A_84_P585271	AT1G49475	DNA binding / transcription factor [AT1G49475.1]		-1.23827
A_84_P17810	AT1G49840	similar to unknown protein [Arabidopsis thaliana] (TAIR:AT3G19540.1); similar to unnamed protein product [Vitis vinifera] (GB:CAO70870.1); similar to hypothetical protein [Vitis vinifera] (GB:CAN68554.1); contains InterPro domain Protein of unknown function DUF620 (InterPro:IPR006873) [AT1G49840.1]	-1.19122
A_84_P729473	AT1G50055	TAS1B; other RNA [AT1G50055.1]		1.40173
A_84_P17021	AT1G50250	FTSH1 (FtsH protease 1); ATP-dependent peptidase/ ATPase/ metallopeptidase [AT1G50250.1]		-1.02687
A_84_P15763	AT1G50450	binding / catalytic [AT1G50450.1]		-1.13777
A_84_P21002	AT1G51090	heavy-metal-associated domain-containing protein [AT1G51090.1]		-1.57889
A_84_P528550	AT1G51110	plastid-lipid associated protein PAP / fibrillin family protein [AT1G51110.1]		-1.3664
A_84_P13436	AT1G51140	basic helix-loop-helix (bHLH) family protein [AT1G51140.1]	-1.82945	-1.9336
A_84_P10418	AT1G51440	lipase class 3 family protein [AT1G51440.1]		-1.09007
A_84_P18092	AT1G51620	protein kinase family protein [AT1G51620.1]		1.47116	1.36207
A_84_P753739	AT1G51680	4CL1 (4-COUMARATE:COA LIGASE 1) [AT1G51680.3]		1.4055	1.14319
A_84_P22854	AT1G51790	kinase [AT1G51790.1]		2.2598	2.0885
A_84_P10528	AT1G51800	leucine-rich repeat protein kinase, putative [AT1G51800.1]		2.96678	2.56646
A_84_P752862	AT1G51802	Encodes a defensin-like (DEFL) family protein. [AT1G51802.1]	-1.97146	-2.24166
A_84_P16264	AT1G51810	kinase [AT1G51810.1]	-2.43632	-2.33976
A_84_P13200	AT1G51820	leucine-rich repeat protein kinase, putative [AT1G51820.1]		1.84564	2.28478
A_84_P21942	AT1G51850	leucine-rich repeat protein kinase, putative [AT1G51850.1]		2.87822	3.69493
A_84_P20996	AT1G51860	leucine-rich repeat protein kinase, putative [AT1G51860.1]		1.78913	1.53921
A_84_P17210	AT1G51890	leucine-rich repeat protein kinase, putative [AT1G51890.1]		1.36896
A_84_P753747	AT1G51913	unknown protein [AT1G51913.1]		2.82626
A_84_P555128	AT1G51915	cryptdin protein-related [AT1G51915.1]		2.42938
A_84_P541841	AT1G51920	unknown protein [AT1G51920.1]		2.23306
A_84_P152118	AT1G52200	similar to unknown protein [Arabidopsis thaliana] (TAIR:AT3G18470.1); similar to unnamed protein product [Vitis vinifera] (GB:CAO45876.1); contains InterPro domain Protein of unknown function Cys-rich (InterPro:IPR006461) [AT1G52200.1]		1.28649
A_84_P754171	AT1G52342	unknown protein [AT1G52342.1]			1.0484
A_84_P11439	AT1G52560	26.5 kDa class I small heat shock protein-like (HSP26.5-P) [AT1G52560.1]	-2.13648	-2.14733
A_84_P859915	AT1G52700	phospholipase/carboxylesterase family protein [AT1G52700.1]			-1.23762
A_84_P18107	AT1G52760	esterase/lipase/thioesterase family protein [AT1G52760.1]		1.14785	1.19062
A_84_P13379	AT1G52830	IAA6 (indoleacetic acid-induced protein 6); transcription factor [AT1G52830.1]		-1.3296
A_84_P241325	AT1G52870	peroxisomal membrane protein-related [AT1G52870.1]		-1.47545
A_84_P19272	AT1G53100	acetylglucosaminyltransferase [AT1G53100.1]	-1.13069
A_84_P825052	AT1G53170	ATERF-8/ATERF8 (ETHYLENE RESPONSE ELEMENT BINDING FACTOR 4); DNA binding / transcription factor/ transcription repressor [AT1G53170.1]		-1.00023
A_84_P816336	AT1G53310	ATPPC1 (PHOSPHOENOLPYRUVATE CARBOXYLASE 1); phosphoenolpyruvate carboxylase [AT1G53310.3]	1.06523		1.242
A_84_P754007	AT1G53543	unknown protein [AT1G53543.1]		1.15036
A_84_P511702	AT1G53625	unknown protein [AT1G53625.1]	1.49619	1.65944
A_84_P752060	AT1G53630	transposable element gene [AT1G53630.1]		1.77008
A_84_P753761	AT1G53635	unknown protein [AT1G53635.1]		2.76376
A_84_P807479	AT1G54000	myrosinase-associated protein, putative [AT1G54000.1]	1.51388
A_84_P17086	AT1G54040	ESP (EPITHIOSPECIFIER PROTEIN) [AT1G54040.1]		-1.14631
A_84_P204568	AT1G54120	similar to unknown protein [Arabidopsis thaliana] (TAIR:AT3G14060.1); similar to unnamed protein product [Vitis vinifera] (GB:CAO45609.1) [AT1G54120.1]		-1.05933
A_84_P10469	AT1G54160	CCAAT-binding transcription factor (CBF-B/NF-YA) family protein [AT1G54160.1]		-1.01278
A_84_P751343	AT1G54660	pseudogene, similar to vetispiradiene synthase, blastp match of 54% identity and 3.0e-79 P-value to GP [AT1G54660.1]		1.27464
A_84_P259390	AT1G54780	thylakoid lumen 18.3 kDa protein [AT1G54780.1]		-1.4515
A_84_P856777	AT1G54890	late embryogenesis abundant protein-related / LEA protein-related [AT1G54890.1]		3.233
A_84_P19775	AT1G55230	similar to unknown protein [Arabidopsis thaliana] (TAIR:AT1G55240.1); similar to unnamed protein product [Vitis vinifera] (GB:CAO63741.1); contains InterPro domain Protein of unknown function DUF716 (InterPro:IPR006904) [AT1G55230.1]		2.73054
A_84_P16933	AT1G55290	oxidoreductase, 2OG-Fe(II) oxygenase family protein [AT1G55290.1]		-1.34281
A_84_P11522	AT1G55440	DC1 domain-containing protein [AT1G55440.1]	-2.90503
A_84_P15303	AT1G55480	binding / protein binding [AT1G55480.1]		-1.65232
A_84_P753508	AT1G55525	other RNA [AT1G55525.1]		2.03317
A_84_P22799	AT1G55760	BTB/POZ domain-containing protein [AT1G55760.1]		-1.413
A_84_P11157	AT1G55810	uracil phosphoribosyltransferase, putative / UMP pyrophosphorylase, putative / UPRTase, putative [AT1G55810.1]	1.041	1.7387
A_84_P21886	AT1G55920	AtSerat2;1 (SERINE ACETYLTRANSFERASE 1) [AT1G55920.1]		1.06907
A_84_P23520	AT1G56130	leucine-rich repeat family protein / protein kinase family protein [AT1G56130.1]		1.37664
A_84_P18118	AT1G56430	nicotianamine synthase, putative [AT1G56430.1]		-2.24163
A_84_P750600	AT1G56480	pseudogene, pectinesterase, blastp match of 65% identity and 9.5e-47 P-value to GP [AT1G56480.1]		3.16197
A_84_P821828	AT1G56500	haloacid dehalogenase-like hydrolase family protein [AT1G56500.1]		-1.01581
A_84_P788878	AT1G56510	disease resistance protein (TIR-NBS-LRR class), putative [AT1G56510.1]	-1.18264
A_84_P143829	AT1G56550	similar to unknown protein [Arabidopsis thaliana] (TAIR:AT4G01220.1); similar to unnamed protein product [Vitis vinifera] (GB:CAO39698.1); similar to hypothetical protein [Vitis vinifera] (GB:CAN69309.1); contains InterPro domain Reticulon; (InterPro:IPR003388) [AT1G56550.1]		1.12162	1.2353
A_84_P17929	AT1G56600	ATGOLS2 (ARABIDOPSIS THALIANA GALACTINOL SYNTHASE 2); transferase, transferring glycosyl groups / transferase, transferring hexosyl groups [AT1G56600.1]		-1.68068
A_84_P16037	AT1G56650	PAP1 (PRODUCTION OF ANTHOCYANIN PIGMENT 1); DNA binding / transcription factor [AT1G56650.1]			1.21432
A_84_P121502	AT1G57980	purine permease-related [AT1G57980.1]		-1.05191
A_84_P235603	AT1G58190	leucine-rich repeat family protein [AT1G58190.1]		1.1578
A_84_P837084	AT1G58280	similar to unknown protein [Arabidopsis thaliana] (TAIR:AT5G64460.6); similar to unknown protein [Arabidopsis thaliana] (TAIR:AT5G64460.4); similar to unknown protein [Arabidopsis thaliana] (TAIR:AT5G64460.3); similar to hypothetical protein [Vitis vinifera] (GB:CAN70041.1); contains InterPro domain Phosphoglycerate mutase (InterPro:IPR013078) [AT1G58280.1]		-1.20432
A_84_P585407	AT1G58520	RXW8 [AT1G58520.1]		-1.34492
A_84_P15199	AT1G59950	aldo/keto reductase, putative [AT1G59950.1]	1.83082
A_84_P831773	AT1G60640	similar to unknown protein [Arabidopsis thaliana] (TAIR:AT2G22795.1); similar to unnamed protein product [Vitis vinifera] (GB:CAO68771.1); similar to unknown [Populus trichocarpa] (GB:ABK93752.1); contains domain C2H2 and C2HC zinc fingers (SSF57667) [AT1G60640.2]		1.0335
A_84_P585411	AT1G60740	peroxiredoxin type 2, putative [AT1G60740.1]		1.49302
A_84_P752720	AT1G60989	SCRL7 (SCR-Like 7) [AT1G60989.1]		-1.17431
A_84_P22715	AT1G61110	ANAC025 (Arabidopsis NAC domain containing protein 25); transcription factor [AT1G61110.1]		2.29247
A_84_P21769	AT1G61120	terpene synthase/cyclase family protein [AT1G61120.1]	1.96715	1.19723
A_84_P804005	AT1G61360	S-locus lectin protein kinase family protein [AT1G61360.1]		1.10312
A_84_P23655	AT1G61560	MLO6 (MILDEW RESISTANCE LOCUS O 6); calmodulin binding [AT1G61560.1]		1.24077
A_84_P231939	AT1G61800	GPT2 (glucose-6-phosphate/phosphate translocator 2); antiporter/ glucose-6-phosphate transmembrane transporter [AT1G61800.1]		1.76051
A_84_P551607	AT1G61810	BGLU45; hydrolase, hydrolyzing O-glycosyl compounds [AT1G61810.2]		1.07267
A_84_P14235	AT1G61820	BGLU46; hydrolase, hydrolyzing O-glycosyl compounds [AT1G61820.1]	2.2123	1.8543
A_84_P259470	AT1G61890	MATE efflux family protein [AT1G61890.1]	-1.06002
A_84_P199334	AT1G62050	similar to ankyrin repeat family protein [Arabidopsis thaliana] (TAIR:AT1G11740.1); similar to unnamed protein product [Vitis vinifera] (GB:CAO21232.1); contains InterPro domain Ankyrin (InterPro:IPR002110) [AT1G62050.1]	-1.13846
A_84_P592544	AT1G62120	mitochondrial transcription termination factor-related / mTERF-related [AT1G62120.1]		-1.14464
A_84_P839263	AT1G62290	aspartyl protease family protein [AT1G62290.1]		-1.11165
A_84_P846303	AT1G62300	WRKY6 (WRKY DNA-binding protein 6); transcription factor [AT1G62300.1]		1.10026
A_84_P19094	AT1G62360	STM (SHOOT MERISTEMLESS); transcription factor [AT1G62360.1]		3.51436
A_84_P752326	AT1G62420	similar to unknown protein [Arabidopsis thaliana] (TAIR:AT1G12030.1); similar to Protein of unknown function DUF506, plant [Medicago truncatula] (GB:ABN05810.1); contains InterPro domain Protein of unknown function DUF506, plant (InterPro:IPR006502) [AT1G62420.1]		1.62934
A_84_P11357	AT1G62500	protease inhibitor/seed storage/lipid transfer protein (LTP) family protein [AT1G62500.1]		5.10505
A_84_P16082	AT1G62540	flavin-containing monooxygenase family protein / FMO family protein [AT1G62540.1]		-1.3497
A_84_P17974	AT1G62570	flavin-containing monooxygenase family protein / FMO family protein [AT1G62570.1]		-1.25144
A_84_P18655	AT1G62710	BETA-VPE (vacuolar processing enzyme beta); cysteine-type endopeptidase [AT1G62710.1]		-1.28393
A_84_P18892	AT1G62760	invertase/pectin methylesterase inhibitor family protein [AT1G62760.1]		1.62129	3.08592
A_84_P16547	AT1G62990	KNAT7 (Knotted-like Arabidopsis thaliana); DNA binding / transcription factor [AT1G62990.1]		-1.01047
A_84_P859203	AT1G63120	ATRBL2 (ARABIDOPSIS THALIANA RHOMBOID-LIKE 2); serine-type endopeptidase [AT1G63120.1]		-1.10512
A_84_P234129	AT1G63245	CLE14 (CLAVATA3/ESR-RELATED 14); receptor binding [AT1G63245.1]		1.21113	1.26291
A_84_P22903	AT1G63450	catalytic [AT1G63450.1]		1.92683
A_84_P839984	AT1G63580	protein kinase-related [AT1G63580.1]		1.44555	1.74257
A_84_P23777	AT1G63880	disease resistance protein (TIR-NBS-LRR class), putative [AT1G63880.1]		-1.12409
A_84_P503753	AT1G63930	similar to unknown protein [Arabidopsis thaliana] (TAIR:AT4G23530.1); similar to hypothetical protein [Vitis vinifera] (GB:CAN64338.1); contains InterPro domain Protein of unknown function DUF793 (InterPro:IPR008511) [AT1G63930.1]	-1.42545
A_84_P23860	AT1G64110	AAA-type ATPase family protein [AT1G64110.1]	-2.2425
A_84_P21020	AT1G64150	similar to unknown protein [Arabidopsis thaliana] (TAIR:AT4G13590.1); similar to unnamed protein product [Vitis vinifera] (GB:CAO65879.1); contains InterPro domain Protein of unknown function UPF0016; (InterPro:IPR001727) [AT1G64150.1]		-1.3172
A_84_P11564	AT1G64160	disease resistance-responsive family protein / dirigent family protein [AT1G64160.1]		4.12142
A_84_P11371	AT1G64680	similar to unknown protein [Arabidopsis thaliana] (TAIR:AT1G03055.1); similar to unnamed protein product [Vitis vinifera] (GB:CAO62908.1) [AT1G64680.1]		-1.8019
A_84_P18984	AT1G64760	glycosyl hydrolase family 17 protein [AT1G64760.1]	-1.20081	-1.48138
A_84_P751425	AT1G64770	carbohydrate binding / catalytic [AT1G64770.1]		-1.5395
A_84_P20876	AT1G64780	ATAMT1;2 (AMMONIUM TRANSPORTER 1;2); ammonium transmembrane transporter [AT1G64780.1]		-1.30047
A_84_P822038	AT1G64890	integral membrane transporter family protein [AT1G64890.1]	-1.02203	-1.1332
A_84_P597003	AT1G64980	similar to unnamed protein product [Vitis vinifera] (GB:CAO62125.1); contains domain SSF53448 (SSF53448) [AT1G64980.1]		-1.04161
A_84_P826969	AT1G65030	transducin family protein / WD-40 repeat family protein [AT1G65030.1]		1.0123
A_84_P146418	AT1G65230	similar to hypothetical protein [Vitis vinifera] (GB:CAN76393.1) [AT1G65230.1]		-1.94455
A_84_P297064	AT1G65310	ATXTH17 (XYLOGLUCAN ENDOTRANSGLUCOSYLASE/HYDROLASE 17); hydrolase, acting on glycosyl bonds [AT1G65310.1]	1.15919
A_84_P754300	AT1G65481	other RNA [AT1G65481.1]	2.79943	3.69598	2.22016
A_84_P754435	AT1G65486	similar to unknown protein [Arabidopsis thaliana] (TAIR:AT1G65500.1) [AT1G65486.1]			1.74896
A_84_P18947	AT1G65520	enoyl-CoA hydratase/isomerase family protein [AT1G65520.1]		1.10385
A_84_P822127	AT1G65590	ATHEX1/HEXO3 (BETA-HEXOSAMINIDASE 3); beta-N-acetylhexosaminidase/ hexosaminidase [AT1G65590.1]		-1.05315
A_84_P16072	AT1G65690	harpin-induced protein-related / HIN1-related / harpin-responsive protein-related [AT1G65690.1]	1.52213	2.03058	1.87401
A_84_P18033	AT1G65710	similar to unknown protein [Arabidopsis thaliana] (TAIR:AT5G37010.1); similar to hypothetical protein [Vitis vinifera] (GB:CAN76723.1) [AT1G65710.1]		1.09818
A_84_P11417	AT1G65730	YSL7 (YELLOW STRIPE LIKE 7); oligopeptide transporter [AT1G65730.1]	1.96641	1.8279
A_84_P586318	AT1G65845	unknown protein [AT1G65845.1]			1.97741
A_84_P827867	AT1G65880	BZO1; benzoate-CoA ligase [AT1G65880.1]			1.67568
A_84_P10495	AT1G65890	acyl-activating enzyme 12 (AAE12) [AT1G65890.1]			1.63092
A_84_P169033	AT1G65970	TPX2 (THIOREDOXIN-DEPENDENT PEROXIDASE 2); antioxidant [AT1G65970.1]	1.68127	1.96489	2.28272
A_84_P20958	AT1G66130	oxidoreductase N-terminal domain-containing protein [AT1G66130.1]		-1.14788
A_84_P810483	AT1G66200	ATGSR2 (Arabidopsis thaliana glutamine synthase clone R2); glutamate-ammonia ligase [AT1G66200.2]			1.00837
A_84_P11390	AT1G66280	glycosyl hydrolase family 1 protein [AT1G66280.1]	3.22511
A_84_P21851	AT1G66370	MYB113 (myb domain protein 113); DNA binding / transcription factor [AT1G66370.1]		2.64227
A_84_P22817	AT1G66460	protein kinase family protein [AT1G66460.1]		1.19875
A_84_P12282	AT1G66650	seven in absentia (SINA) protein, putative [AT1G66650.1]	-1.1623
A_84_P14305	AT1G66780	MATE efflux family protein [AT1G66780.1]	1.83512	1.91429
A_84_P20016	AT1G66830	leucine-rich repeat transmembrane protein kinase, putative [AT1G66830.1]			1.52361
A_84_P23763	AT1G66850	protease inhibitor/seed storage/lipid transfer protein (LTP) family protein [AT1G66850.1]		4.64851
A_84_P21944	AT1G66930	serine/threonine protein kinase family protein [AT1G66930.1]			2.10408
A_84_P310353	AT1G66940	protein kinase-related [AT1G66940.1]	-1.40264
A_84_P838135	AT1G66950	ATPDR11/PDR11 (PLEIOTROPIC DRUG RESISTANCE 11); ATPase, coupled to transmembrane movement of substances [AT1G66950.1]	1.51152	1.271
A_84_P17183	AT1G67070	DIN9 (DARK INDUCIBLE 9); mannose-6-phosphate isomerase [AT1G67070.1]		2.97338
A_84_P842072	AT1G67370	ASY1 (ASYNAPTIC 1); DNA binding [AT1G67370.1]	-1.73903		-1.3717
A_84_P837798	AT1G67480	kelch repeat-containing F-box family protein [AT1G67480.1]	1.11706	1.24939
A_84_P287320	AT1G67635	similar to phosphatidylinositol 3- and 4-kinase family protein [Arabidopsis thaliana] (TAIR:AT1G27570.1); contains domain PTHR15245:SF11 (PTHR15245:SF11); contains domain PTHR15245 (PTHR15245) [AT1G67635.1]			2.38256
A_84_P752083	AT1G67855	unknown protein [AT1G67855.1]	-1.63352
A_84_P18111	AT1G67980	CCoAMT (caffeoyl-CoA 3-O-methyltransferase); caffeoyl-CoA O-methyltransferase [AT1G67980.1]		1.69019
A_84_P854905	AT1G68010	HPR (HYDROXYPYRUVATE REDUCTASE); glycerate dehydrogenase/ poly(U) binding [AT1G68010.1]		-1.3306
A_84_P19991	AT1G68150	WRKY9 (WRKY DNA-binding protein 9); transcription factor [AT1G68150.1]		4.02432	3.70662
A_84_P754415	AT1G68238	unknown protein [AT1G68238.1]		1.64536
A_84_P772807	AT1G68240	contains InterPro domain Basic helix-loop-helix dimerisation region bHLH; (InterPro:IPR001092); contains InterPro domain Helix-loop-helix DNA-binding; (InterPro:IPR011598) [AT1G68240.2]		-1.36284
A_84_P16207	AT1G68360	zinc finger protein-related [AT1G68360.1]		-1.20724	-1.23391
A_84_P249125	AT1G68500	similar to hypothetical protein [Vitis vinifera] (GB:CAN66643.1) [AT1G68500.1]		-1.23785
A_84_P18751	AT1G68570	proton-dependent oligopeptide transport (POT) family protein [AT1G68570.1]	-1.38313	-1.12877
A_84_P12113	AT1G68600	similar to unknown protein [Arabidopsis thaliana] (TAIR:AT1G25480.1); similar to unknown protein [Arabidopsis thaliana] (TAIR:AT2G17470.1); similar to unnamed protein product [Vitis vinifera] (GB:CAO42118.1); contains InterPro domain Protein of unknown function UPF0005 (InterPro:IPR006214) [AT1G68600.1]		-1.7398
A_84_P19990	AT1G68810	basic helix-loop-helix (bHLH) family protein [AT1G68810.1]			-1.463
A_84_P753030	AT1G68825	DVL5/RTFL15 (ROTUNDIFOLIA LIKE 15) [AT1G68825.1]			2.41353
A_84_P597910	AT1G68870	similar to unknown protein [Arabidopsis thaliana] (TAIR:AT1G26210.1) [AT1G68870.1]		-2.4365
A_84_P17164	AT1G68880	ATBZIP (ARABIDOPSIS THALIANA BASIC LEUCINE-ZIPPER 8); DNA binding / transcription factor [AT1G68880.1]		3.30876
A_84_P107092	AT1G69050	unknown protein [AT1G69050.1]		2.09729
A_84_P14181	AT1G69120	AP1 (APETALA1); DNA binding / transcription factor [AT1G69120.1]		3.81867
A_84_P839806	AT1G69252	other RNA [AT1G69252.1]		-1.0853
A_84_P560506	AT1G69430	similar to unknown protein [Arabidopsis thaliana] (TAIR:AT1G26650.1); similar to unnamed protein product [Vitis vinifera] (GB:CAO68474.1) [AT1G69430.1]	-1.0068
A_84_P593458	AT1G69523	UbiE/COQ5 methyltransferase family protein [AT1G69523.1]		1.7432
A_84_P587219	AT1G69526	UbiE/COQ5 methyltransferase family protein [AT1G69526.1]		1.72673	1.52613
A_84_P19046	AT1G69920	ATGSTU12 (Arabidopsis thaliana Glutathione S-transferase (class tau) 12); glutathione transferase [AT1G69920.1]		1.82821
A_84_P754785	AT1G69970	CLE26 (CLAVATA3/ESR-RELATED 26) [AT1G69970.2]		-1.05535
A_84_P16105	AT1G70080	terpene synthase/cyclase family protein [AT1G70080.1]	-1.4298
A_84_P14214	AT1G70100	similar to unknown protein [Arabidopsis thaliana] (TAIR:AT1G24160.1); similar to unnamed protein product [Vitis vinifera] (GB:CAO40971.1) [AT1G70100.1]	-1.04282
A_84_P10433	AT1G70140	ATFH8 (FORMIN 8); actin binding / actin filament binding / profilin binding [AT1G70140.1]	1.4999	1.74359	2.0014
A_84_P22726	AT1G70170	MMP (MATRIX METALLOPROTEINASE); metalloendopeptidase [AT1G70170.1]			1.28252
A_84_P14215	AT1G70210	CYCD1;1 (CYCLIN D1;1); cyclin-dependent protein kinase regulator [AT1G70210.1]	-1.05672
A_84_P839203	AT1G70260	nodulin MtN21 family protein [AT1G70260.1]		-1.9121
A_84_P810735	AT1G70580	AOAT2 (GLUTAMATE:GLYOXYLATE AMINOTRANSFERASE 2); alanine transaminase [AT1G70580.2]	-1.01957	-1.1124
A_84_P14323	AT1G70680	caleosin-related family protein [AT1G70680.1]		-1.57587
A_84_P750407	AT1G70760	inorganic carbon transport protein-related [AT1G70760.1]		-2.04729
A_84_P753793	AT1G70830	MLP28 (MLP-LIKE PROTEIN 28) [AT1G70830.4]			-1.08305
A_84_P808187	AT1G70850	MLP34 (MLP-LIKE PROTEIN 34) [AT1G70850.3]		-1.14427
A_84_P125241	AT1G70895	CLE17 (CLAVATA3/ESR-RELATED 17); receptor binding [AT1G70895.1]		1.09715
A_84_P94079	AT1G70900	similar to unknown protein [Arabidopsis thaliana] (TAIR:AT1G23110.3); similar to unknown protein [Arabidopsis thaliana] (TAIR:AT1G23110.1); similar to unknown protein [Arabidopsis thaliana] (TAIR:AT1G23110.2); similar to hypothetical protein [Vitis vinifera] (GB:CAN77015.1) [AT1G70900.1]		-1.164
A_84_P556074	AT1G70985	hydroxyproline-rich glycoprotein family protein [AT1G70985.1]		-2.17821
A_84_P795468	AT1G71100	RSW10 (RADIAL SWELLING 10); ribose-5-phosphate isomerase [AT1G71100.1]		1.14181
A_84_P513315	AT1G71200	basic helix-loop-helix (bHLH) family protein [AT1G71200.1]	-1.33839
A_84_P20789	AT1G71400	disease resistance family protein / LRR family protein [AT1G71400.1]		1.83583
A_84_P12472	AT1G71710	inositol polyphosphate 5-phosphatase, putative [AT1G71710.1]		-1.02118
A_84_P19024	AT1G71880	SUC1 (SUCROSE-PROTON SYMPORTER 1); carbohydrate transmembrane transporter/ sucrose:hydrogen symporter/ sugar:hydrogen ion symporter [AT1G71880.1]		1.34979
A_84_P12451	AT1G72100	late embryogenesis abundant domain-containing protein / LEA domain-containing protein [AT1G72100.1]	-1.96226	-1.77381
A_84_P16227	AT1G72200	zinc finger (C3HC4-type RING finger) family protein [AT1G72200.1]		-1.4284
A_84_P21584	AT1G72210	basic helix-loop-helix (bHLH) family protein (bHLH096) [AT1G72210.1]		-1.07811
A_84_P11184	AT1G72240	similar to unknown protein [Arabidopsis thaliana] (TAIR:AT1G22470.1) [AT1G72240.1]	-1.19845
A_84_P789698	AT1G72416	heat shock protein binding [AT1G72416.1]	-2.13041
A_84_P20950	AT1G72610	GLP1 (GERMIN-LIKE PROTEIN 1); manganese ion binding / metal ion binding / nutrient reservoir [AT1G72610.1]		-1.2714
A_84_P529493	AT1G72620	hydrolase, alpha/beta fold family protein [AT1G72620.1]	-2.00648	-1.52495
A_84_P517092	AT1G72640	binding / catalytic [AT1G72640.1]		-1.25721
A_84_P542792	AT1G72670	IQD8 (IQ-domain 8); calmodulin binding [AT1G72670.1]		-1.0156
A_84_P12440	AT1G72770	HAB1 (HOMOLOGY TO ABI1); protein serine/threonine phosphatase [AT1G72770.1]	-1.08977
A_84_P856377	AT1G72900	disease resistance protein (TIR-NBS class), putative [AT1G72900.1]		1.72277
A_84_P751526	AT1G72920	disease resistance protein (TIR-NBS class), putative [AT1G72920.1]		1.53553
A_84_P21836	AT1G72940	disease resistance protein (TIR-NBS class), putative [AT1G72940.1]		1.15014
A_84_P11435	AT1G72970	HTH (HOTHEAD); aldehyde-lyase [AT1G72970.1]	-1.09049
A_84_P173571	AT1G73165	CLE1 (CLAVATA3/ESR-RELATED 1); receptor binding [AT1G73165.1]			2.31209
A_84_P14326	AT1G73220	ATOCT1 (ARABIDOPSIS THALIANA ORGANIC CATION/CARNITINE TRANSPORTER1); carbohydrate transmembrane transporter/ carnitine transporter/ transporter [AT1G73220.1]	-1.92868
A_84_P22839	AT1G73260	trypsin and protease inhibitor family protein / Kunitz family protein [AT1G73260.1]		2.31152	2.79877
A_84_P16271	AT1G73330	ATDR4 (Arabidopsis thaliana drought-repressed 4) [AT1G73330.1]		-1.9467
A_84_P797654	AT1G73510	unknown protein [AT1G73510.1]	-2.51779	-1.50057
A_84_P14954	AT1G73600	phosphoethanolamine N-methyltransferase [AT1G73600.1]		-2.27508
A_84_P274730	AT1G73965	CLE13 (CLAVATA3/ESR-RELATED 13); receptor binding [AT1G73965.1]		1.97089	1.0706
A_84_P13373	AT1G74000	SS3 (STRICTOSIDINE SYNTHASE 3) [AT1G74000.1]	2.62731	1.86258
A_84_P12428	AT1G74010	strictosidine synthase family protein [AT1G74010.1]	2.29094	1.8067
A_84_P11483	AT1G74020	SS2 (STRICTOSIDINE SYNTHASE 2); strictosidine synthase [AT1G74020.1]		1.01375	1.06173
A_84_P19047	AT1G74100	sulfotransferase family protein [AT1G74100.1]		1.16879
A_84_P12432	AT1G74590	ATGSTU10 (Arabidopsis thaliana Glutathione S-transferase (class tau) 10); glutathione transferase [AT1G74590.1]		1.51974
A_84_P19997	AT1G74670	gibberellin-responsive protein, putative [AT1G74670.1]		-3.3677
A_84_P812143	AT1G74880	NDH-O (NAD(P)H:PLASTOQUINONE DEHYDROGENASE COMPLEX SUBUNIT O) [AT1G74880.1]		-1.36712	-1.14191
A_84_P820520	AT1G74940	senescence-associated protein-related [AT1G74940.1]		-1.11154
A_84_P206918	AT1G75100	JAC1 (J-DOMAIN PROTEIN REQUIRED FOR CHLOROPLAST ACCUMULATION RESPONSE 1); heat shock protein binding [AT1G75100.1]		-1.16981
A_84_P18125	AT1G75280	isoflavone reductase, putative [AT1G75280.1]		-1.09784
A_84_P258120	AT1G75830	LCR67/PDF1.1 (Low-molecular-weight cysteine-rich 67) [AT1G75830.1]		-2.00998	-2.13469
A_84_P309203	AT1G76070	Identical to Uncharacterized protein At1g76070 [Arabidopsis Thaliana] (GB:Q9SGS5;GB:Q8LAC9;GB:Q9LQR1); similar to unknown protein [Arabidopsis thaliana] (TAIR:AT1G20310.1); similar to hypothetical protein [Vitis vinifera] (GB:CAN83887.1) [AT1G76070.1]		1.00912
A_84_P584570	AT1G76210	similar to unknown protein [Arabidopsis thaliana] (TAIR:AT1G20520.1); similar to hypothetical protein [Vitis vinifera] (GB:CAN69930.1); contains InterPro domain Protein of unknown function DUF241, plant (InterPro:IPR004320) [AT1G76210.1]	-2.13438	-2.16928
A_84_P20919	AT1G76550	pyrophosphate--fructose-6-phosphate 1-phosphotransferase alpha subunit, putative / pyrophosphate-dependent 6-phosphofructose-1-kinase, putative [AT1G76550.1]		1.27461
A_84_P194124	AT1G76560	CP12-3 [AT1G76560.1]		1.1437
A_84_P18113	AT1G76640	calmodulin-related protein, putative [AT1G76640.1]	2.58186	1.76382
A_84_P19059	AT1G76730	5-formyltetrahydrofolate cyclo-ligase family protein [AT1G76730.1]		-1.11129
A_84_P22843	AT1G76790	O-methyltransferase family 2 protein [AT1G76790.1]	1.98961
A_84_P830829	AT1G77020	DNAJ heat shock N-terminal domain-containing protein [AT1G77020.1]		-1.25959
A_84_P556095	AT1G77030	glycine-rich protein [AT1G77030.1]		1.06093
A_84_P22712	AT1G77090	thylakoid lumenal 29.8 kDa protein [AT1G77090.1]		-1.04998
A_84_P753635	AT1G77235	MIR402; miRNA [AT1G77235.1]		1.30308
A_84_P512655	AT1G77640	AP2 domain-containing transcription factor, putative [AT1G77640.1]		-1.74806
A_84_P754792	AT1G77765	unknown protein [AT1G77765.4]			1.03661
A_84_P11438	AT1G78000	SULTR1;2 (SULFATE TRANSPORTER 1;2); sulfate transmembrane transporter [AT1G78000.1]		1.75403
A_84_P785283	AT1G78070	WD-40 repeat family protein [AT1G78070.1]	-1.17385
A_84_P806824	AT1G78210	hydrolase, alpha/beta fold family protein [AT1G78210.1]		1.1215
A_84_P852521	AT1G78290	serine/threonine protein kinase, putative [AT1G78290.2]	-1.47597
A_84_P260410	AT1G78450	SOUL heme-binding family protein [AT1G78450.1]		-2.978
A_84_P21802	AT1G78780	pathogenesis-related family protein [AT1G78780.1]			1.68683
A_84_P824861	AT1G79460	GA2 (GA REQUIRING 2); ent-kaurene synthase [AT1G79460.1]	-1.6183
A_84_P12477	AT1G79680	wall-associated kinase, putative [AT1G79680.1]	1.31687	1.92717
A_84_P810381	AT1G79930	HSP91 (Heat shock protein 91) [AT1G79930.1]		1.04742
A_84_P857022	AT1G80440	kelch repeat-containing F-box family protein [AT1G80440.1]	1.26034
A_84_P582789	AT1G80450	VQ motif-containing protein [AT1G80450.1]		1.53347
A_84_P814542	AT1G80460	NHO1 (NONHOST RESISTANCE TO P. S. PHASEOLICOLA 1); carbohydrate kinase [AT1G80460.2]	1.31081	1.30851	1.3424
A_84_P17170	AT1G80590	WRKY66 (WRKY DNA-binding protein 66); transcription factor [AT1G80590.1]		3.50231
A_84_P751739	AT1G80710	transducin family protein / WD-40 repeat family protein [AT1G80710.1]		1.43837
A_84_P147538	AT1G80865	unknown protein [AT1G80865.1]		2.12014
A_84_P17337	AT2G01150	RHA2B (RING-H2 FINGER PROTEIN 2B); protein binding / zinc ion binding [AT2G01150.1]		-1.18938
A_84_P799971	AT2G01340	similar to unknown protein [Arabidopsis thaliana] (TAIR:AT1G71015.1); similar to unknown [Glycine max] (GB:AAG38147.1); contains InterPro domain Trigger factor, C-terminal, bacterial; (InterPro:IPR008880) [AT2G01340.1]	1.11958	1.10891
A_84_P17272	AT2G01420	PIN4 (PIN-FORMED 4); auxin:hydrogen symporter/ transporter [AT2G01420.1]		-1.45413
A_84_P126931	AT2G01505	CLE16 (CLAVATA3/ESR-RELATED 16); receptor binding [AT2G01505.1]	-1.2043
A_84_P218248	AT2G01590	similar to unnamed protein product [Vitis vinifera] (GB:CAO42320.1) [AT2G01590.1]		-2.51667
A_84_P784848	AT2G01830	WOL (WOODEN LEG) [AT2G01830.1]		-1.12599	-1.13315
A_84_P707913	AT2G01918	calcium ion binding [AT2G01918.1]		-1.05475
A_84_P523321	AT2G01920	epsin N-terminal homology (ENTH) domain-containing protein / clathrin assembly protein-related [AT2G01920.1]		1.41518
A_84_P757250	AT2G02135	Encodes a member of a family of small,secreted, cysteine rich protein with sequence similarity to the PCP (pollen coat protein) gene family. [AT2G02135.1]		-1.6776
A_84_P18234	AT2G02310	ATPP2-B6 (Phloem protein 2-B6); carbohydrate binding [AT2G02310.1]	2.09442	2.47503
A_84_P755439	AT2G02330	pseudogene, similar to P0443G08.20, blastp match of 37% identity and 7.2e-16 P-value to GP [AT2G02330.1]		1.11977
A_84_P88649	AT2G02850	ARPN (PLANTACYANIN); copper ion binding [AT2G02850.1]		1.19902	1.46868
A_84_P288954	AT2G03020	heat shock protein-related [AT2G03020.1]	-1.29114
A_84_P14510	AT2G03090	ATEXPA15 (ARABIDOPSIS THALIANA EXPANSIN A15) [AT2G03090.1]			-1.54789
A_84_P827084	AT2G03420	similar to expressed protein [Oryza sativa (japonica cultivar-group)] (GB:ABF94594.1); similar to hypothetical protein OsI_010237 [Oryza sativa (indica cultivar-group)] (GB:EAY89004.1) [AT2G03420.1]	-1.18313
A_84_P585488	AT2G03810	18S pre-ribosomal assembly protein gar2-related [AT2G03810.1]		1.29104
A_84_P58520	AT2G04039	similar to unnamed protein product [Vitis vinifera] (GB:CAO41070.1) [AT2G04039.1]		-1.33645
A_84_P120372	AT2G04040	ATDTX1; antiporter/ multidrug efflux pump/ multidrug transporter/ transporter [AT2G04040.1]		2.52986
A_84_P600633	AT2G04050	MATE efflux family protein [AT2G04050.1]		1.2481
A_84_P756195	AT2G04070	transporter [AT2G04070.1]		1.9067
A_84_P796985	AT2G04170	meprin and TRAF homology domain-containing protein / MATH domain-containing protein [AT2G04170.2]		1.09975
A_84_P15419	AT2G04440	NUDIX/mutT hydrolase family protein [AT2G04440.1]		1.10225
A_84_P118982	AT2G04850	auxin-responsive protein-related [AT2G04850.1]		-1.28576
A_84_P803298	AT2G05070	LHCB2.2 (Photosystem II light harvesting complex gene 2.2); chlorophyll binding [AT2G05070.1]		-1.08581
A_84_P240805	AT2G05100	LHCB2.1 (Photosystem II light harvesting complex gene 2.1); chlorophyll binding [AT2G05100.1]		-1.18622
A_84_P88889	AT2G05580	pseudogene, glycine-rich protein [AT2G05580.1]		-1.11903
A_84_P756318	AT2G07693	transposable element gene [AT2G07693.1]		1.00575
A_84_P23614	AT2G07738	unknown protein [AT2G07738.1]		1.57705
A_84_P561436	AT2G07749	Identical to Uncharacterized mitochondrial protein AtMg01110 [Arabidopsis Thaliana] (GB:P92543;GB:Q1ZXX1); similar to hypothetical protein BrnapMp064 [Brassica napus] (GB:YP_717161.1); contains InterPro domain RNA-dependent RNA polymerase, mitoviral (InterPro:IPR008686) [AT2G07749.1]		1.19641
A_84_P756441	AT2G07769	transposable element gene [AT2G07769.1]			1.19928
A_84_P583713	AT2G07775	unknown protein [AT2G07775.1]		1.36282
A_84_P720542	AT2G07783	pseudogene, similar to Ccl1, blastp match of 86% identity and 6.4e-177 P-value to GP [AT2G07783.1]		1.23035
A_84_P796826	AT2G07787	unknown protein [AT2G07787.1]		1.31955
A_84_P758251	AT2G07820	unknown protein [AT2G07820.1]		1.31651
A_84_P837209	AT2G10560	similar to unknown protein [Arabidopsis thaliana] (TAIR:AT5G04860.1); similar to expressed protein [Oryza sativa (japonica cultivar-group)] (GB:ABF97907.1); similar to hypothetical protein OsJ_011438 [Oryza sativa (japonica cultivar-group)] (GB:EAZ27955.1); similar to Os03g0649000 [Oryza sativa (japonica cultivar-group)] (GB:NP_001050782.1) [AT2G10560.1]			1.54201
A_84_P758615	AT2G10589	unknown pseudogene [AT2G10589.1]			1.47783
A_84_P83479	AT2G10940	protease inhibitor/seed storage/lipid transfer protein (LTP) family protein [AT2G10940.1]		-2.66424
A_84_P756691	AT2G11280	pseudogene, hypothetical protein [AT2G11280.1]		1.54756
A_84_P555238	AT2G12400	similar to unknown protein [Arabidopsis thaliana] (TAIR:AT2G25270.1); similar to hypothetical protein OsJ_008445 [Oryza sativa (japonica cultivar-group)] (GB:EAZ24962.1) [AT2G12400.1]	-1.08844	-1.3971
A_84_P809992	AT2G13360	AGT (ALANINE:GLYOXYLATE AMINOTRANSFERASE) [AT2G13360.1]		-1.01068
A_84_P788594	AT2G13410	pseudogene of unknown protein [AT2G13410.1]		1.85253	2.23912
A_84_P757637	AT2G14378	Encodes a ECA1 gametogenesis related family protein [AT2G14378.1]	1.90593	1.83729
A_84_P19160	AT2G14580	ATPRB1 (Arabidopsis thaliana basic pathogenesis-related protein 1) [AT2G14580.1]		1.62441
A_84_P755889	AT2G14970	transposable element gene [AT2G14970.1]		2.8432
A_84_P305070	AT2G15020	similar to unknown protein [Arabidopsis thaliana] (TAIR:AT5G64190.1); similar to hypothetical protein [Vitis vinifera] (GB:CAN67723.1) [AT2G15020.1]		-2.37945
A_84_P13541	AT2G15080	disease resistance family protein [AT2G15080.1]		1.22231
A_84_P203538	AT2G15090	fatty acid elongase, putative [AT2G15090.1]	-1.48041
A_84_P166983	AT2G15340	glycine-rich protein [AT2G15340.1]		1.53074
A_84_P22914	AT2G15490	UGT73B4; UDP-glycosyltransferase/ transferase, transferring glycosyl groups [AT2G15490.1]		1.47174
A_84_P816791	AT2G15580	zinc finger (C3HC4-type RING finger) family protein [AT2G15580.1]		-1.08859
A_84_P51740	AT2G15760	calmodulin-binding protein [AT2G15760.1]		1.62035
A_84_P13454	AT2G15780	glycine-rich protein [AT2G15780.1]		1.95348
A_84_P16290	AT2G15970	COR413-PM1 (cold regulated 413 plasma membrane 1) [AT2G15970.1]		-1.12713
A_84_P757222	AT2G16367	Encodes a defensin-like (DEFL) family protein. [AT2G16367.1]		-2.9071
A_84_P21729	AT2G16595	similar to translocon-associated protein alpha (TRAP alpha) family protein [Arabidopsis thaliana] (TAIR:AT2G21160.1); similar to hypothetical protein [Vitis vinifera] (GB:CAN77171.1); contains domain PTHR12924 (PTHR12924) [AT2G16595.1]		1.15417
A_84_P755447	AT2G16830	a pseudogene whose sequence is similar to plasma membrane intrinsic protein 3 (PIP3) [AT2G16830.1]		-1.53082
A_84_P529548	AT2G16890	UDP-glucoronosyl/UDP-glucosyl transferase family protein [AT2G16890.2]		-1.37558
A_84_P801733	AT2G16895	pseudogene, similar to unnamed protein product, blastp match of 40% identity and 5.7e-21 P-value to GP [AT2G16895.1]		-1.60285
A_84_P14408	AT2G16990	tetracycline transporter [AT2G16990.1]		-2.13218
A_84_P13202	AT2G17040	ANAC036 (Arabidopsis NAC domain containing protein 36); transcription factor [AT2G17040.1]	-1.38318	-1.48717
A_84_P505607	AT2G17055	disease resistance protein-related [AT2G17055.1]		1.86924
A_84_P526889	AT2G17300	similar to unknown protein [Arabidopsis thaliana] (TAIR:AT4G35320.1) [AT2G17300.1]		-1.68803
A_84_P220868	AT2G17740	DC1 domain-containing protein [AT2G17740.1]		4.18406	3.63385
A_84_P820158	AT2G18050	HIS1-3 (HISTONE H1-3); DNA binding [AT2G18050.1]		-1.1659
A_84_P855665	AT2G18200	similar to unknown protein [Arabidopsis thaliana] (TAIR:AT2G18210.1) [AT2G18200.1]	1.6974
A_84_P849804	AT2G18210	similar to unknown protein [Arabidopsis thaliana] (TAIR:AT4G36500.1); similar to hypothetical protein [Thellungiella halophila] (GB:ABB45855.1) [AT2G18210.1]	1.8647
A_84_P838155	AT2G18220	Identical to Nucleolar complex protein 2 homolog [Arabidopsis Thaliana] (GB:Q9ZPV5); similar to unknown protein [Arabidopsis thaliana] (TAIR:AT3G55510.1); similar to hypothetical protein [Vitis vinifera] (GB:CAN81729.1); contains InterPro domain Protein of unknown function UPF0120 (InterPro:IPR005343) [AT2G18220.1]		1.03082
A_84_P13476	AT2G18230	ATPPA2 (ARABIDOPSIS THALIANA PYROPHOSPHORYLASE 2); inorganic diphosphatase/ pyrophosphatase [AT2G18230.1]		-1.33453
A_84_P79415	AT2G18300	basic helix-loop-helix (bHLH) family protein [AT2G18300.1]		-1.91282
A_84_P14446	AT2G19190	FRK1 (FLG22-INDUCED RECEPTOR-LIKE KINASE 1); kinase [AT2G19190.1]		2.19764	2.67152
A_84_P237633	AT2G19640	ASHR2 (ASH1-RELATED PROTEIN 2) [AT2G19640.1]		1.06333
A_84_P797000	AT2G19780	leucine-rich repeat family protein / extensin family protein [AT2G19780.1]		-1.06253
A_84_P17227	AT2G19900	ATNADP-ME1 (NADP-MALIC ENZYME 1); malate dehydrogenase (oxaloacetate-decarboxylating) (NADP+)/ malic enzyme/ oxidoreductase, acting on NADH or NADPH, NAD or NADP as acceptor [AT2G19900.1]	1.09635
A_84_P606882	AT2G20170	similar to unknown protein [Arabidopsis thaliana] (TAIR:AT4G23390.1); similar to unnamed protein product [Vitis vinifera] (GB:CAO22094.1); similar to hypothetical protein [Vitis vinifera] (GB:CAN72570.1); contains InterPro domain Protein of unknown function DUF239, plant (InterPro:IPR004314) [AT2G20170.1]	-2.70918	-3.44128
A_84_P20092	AT2G20470	kinase [AT2G20470.1]		-1.95648
A_84_P757998	AT2G20562	similar to unknown protein [Arabidopsis thaliana] (TAIR:AT2G31090.1); similar to unnamed protein product [Vitis vinifera] (GB:CAO39329.1) [AT2G20562.1]	1.17881	1.33513
A_84_P517162	AT2G20630	protein phosphatase 2C, putative / PP2C, putative [AT2G20630.2]		-1.2408
A_84_P755255	AT2G20640	pseudogene, MAP protein kinase, blastp match of 58% identity and 2.3e-83 P-value to GP [AT2G20640.1]		-1.35172
A_84_P132645	AT2G20670	similar to unknown protein [Arabidopsis thaliana] (TAIR:AT4G32480.1); similar to unnamed protein product [Vitis vinifera] (GB:CAO69754.1); contains InterPro domain Protein of unknown function DUF506, plant (InterPro:IPR006502) [AT2G20670.1]	1.49977	1.67762
A_84_P10627	AT2G20880	AP2 domain-containing transcription factor, putative [AT2G20880.1]		-1.45838
A_84_P12567	AT2G21020	pseudogene, major intrinsic protein (MIP) family, contains Pfam profile: MIP PF00230; blastp match of 61% identity and 1.8e-40 P-value to PIR [AT2G21020.1]		2.56759
A_84_P23915	AT2G21060	ATGRP2B (GLYCINE-RICH PROTEIN 2B); nucleic acid binding [AT2G21060.1]			1.20905
A_84_P20132	AT2G21210	auxin-responsive protein, putative [AT2G21210.1]		-2.33282
A_84_P19216	AT2G21330	fructose-bisphosphate aldolase, putative [AT2G21330.1]		-1.1573
A_84_P286880	AT2G21340	enhanced disease susceptibility protein, putative / salicylic acid induction deficient protein, putative [AT2G21340.1]		-1.08158
A_84_P233069	AT2G21530	forkhead-associated domain-containing protein / FHA domain-containing protein [AT2G21530.1]		-1.2962
A_84_P13523	AT2G21790	R1/RNR1 (RIBONUCLEOTIDE REDUCTASE 1); ribonucleoside-diphosphate reductase [AT2G21790.1]		1.36657
A_84_P234169	AT2G21840	protein binding / zinc ion binding [AT2G21840.1]		1.37867	1.35176
A_84_P22981	AT2G21880	AtRABG2/AtRab7A (Arabidopsis Rab GTPase homolog G2); GTP binding [AT2G21880.1]		-1.37103
A_84_P96316	AT2G21960	similar to unknown protein [Arabidopsis thaliana] (TAIR:AT1G56180.1); similar to unnamed protein product [Vitis vinifera] (GB:CAO71767.1) [AT2G21960.1]		-1.11617
A_84_P545535	AT2G21990	similar to unknown protein [Arabidopsis thaliana] (TAIR:AT4G39610.1); similar to unnamed protein product [Vitis vinifera] (GB:CAO71771.1); contains InterPro domain Protein of unknown function DUF617, plant (InterPro:IPR006460) [AT2G21990.1]		-1.18428
A_84_P21995	AT2G22100	RNA recognition motif (RRM)-containing protein [AT2G22100.1]		1.10705
A_84_P22916	AT2G22190	trehalose-phosphatase [AT2G22190.1]		-1.12147
A_84_P12513	AT2G22240	inositol-3-phosphate synthase isozyme 2 / myo-inositol-1-phosphate synthase 2 / MI-1-P synthase 2 / IPS 2 [AT2G22240.1]		-1.74348
A_84_P586414	AT2G22320	unknown protein [AT2G22320.1]		2.51822
A_84_P18238	AT2G22420	peroxidase 17 (PER17) (P17) [AT2G22420.1]		-1.02526
A_84_P22932	AT2G22770	NAI1; DNA binding / transcription factor [AT2G22770.1]	1.70678	1.65987	1.5991
A_84_P611334	AT2G22880	VQ motif-containing protein [AT2G22880.1]		1.15497
A_84_P598005	AT2G22890	small conjugating protein ligase [AT2G22890.1]		1.32992
A_84_P13519	AT2G23110	similar to unknown protein [Arabidopsis thaliana] (TAIR:AT2G23120.1); similar to seed maturation protein PM35 [Glycine max] (GB:AAD51623.1) [AT2G23110.1]		1.55502
A_84_P837280	AT2G23560	hydrolase, alpha/beta fold family protein [AT2G23560.1]		1.06597
A_84_P11643	AT2G23590	hydrolase, alpha/beta fold family protein [AT2G23590.1]	-1.31038
A_84_P13569	AT2G23770	protein kinase family protein / peptidoglycan-binding LysM domain-containing protein [AT2G23770.1]		1.70264
A_84_P755691	AT2G23860	pseudogene, similar to VAP27, blastp match of 56% identity and 1.3e-25 P-value to GP [AT2G23860.1]		1.50117
A_84_P808823	AT2G24270	ALDH11A3 (Aldehyde dehydrogenase 11A3); 3-chloroallyl aldehyde dehydrogenase/ glyceraldehyde-3-phosphate dehydrogenase (NADP+) [AT2G24270.1]			-1.07992
A_84_P606010	AT2G24320	similar to unknown protein [Arabidopsis thaliana] (TAIR:AT4G31020.2); similar to unknown protein [Arabidopsis thaliana] (TAIR:AT4G31020.1); similar to unnamed protein product [Vitis vinifera] (GB:CAO22751.1); contains domain PTHR12277:SF8 (PTHR12277:SF8); contains domain PTHR12277 (PTHR12277); contains domain SSF53474 (SSF53474); contains domain G3DSA:3.40.50.1820 (G3DSA:3.40.50.1820) [AT2G24320.…	-2.06836
A_84_P832744	AT2G24350	RNA recognition motif (RRM)-containing protein [AT2G24350.1]			1.45499
A_84_P272230	AT2G24540	AFR (ATTENUATED FAR-RED RESPONSE) [AT2G24540.1]		-1.81308
A_84_P812850	AT2G24570	WRKY17 (WRKY DNA-binding protein 17); transcription factor [AT2G24570.1]		1.5842	1.44555
A_84_P12592	AT2G24580	sarcosine oxidase family protein [AT2G24580.1]			1.28357
A_84_P756849	AT2G24730	60S ribosomal protein L4/L1 (RPL4C), pseudogene, blastp match of 68% identity and 7.9e-28 P-value to SP [AT2G24730.1]		-1.81152
A_84_P592665	AT2G24762	ATGDU4 (ARABIDOPSIS THALIANA GLUTAMINE DUMPER 4) [AT2G24762.1]			-1.66634
A_84_P199154	AT2G25210	60S ribosomal protein L39 (RPL39A) [AT2G25210.1]		1.06728
A_84_P502971	AT2G25290	octicosapeptide/Phox/Bem1p (PB1) domain-containing protein / tetratricopeptide repeat (TPR)-containing protein [AT2G25290.1]		-1.19257
A_84_P757627	AT2G25312	transcription factor [AT2G25312.1]	-1.47319	-1.20436
A_84_P16401	AT2G25440	leucine-rich repeat family protein [AT2G25440.1]		2.09013
A_84_P539348	AT2G25735	unknown protein [AT2G25735.1]	1.12272	1.30379
A_84_P558814	AT2G25780	similar to unknown protein [Arabidopsis thaliana] (TAIR:AT1G79770.1); similar to unnamed protein product [Vitis vinifera] (GB:CAO45838.1); contains InterPro domain Protein of unknown function DUF1677, plant (InterPro:IPR012876) [AT2G25780.1]			1.76977
A_84_P11557	AT2G25820	transcription factor [AT2G25820.1]	-1.53395	-2.01948
A_84_P14393	AT2G25880	ATAUR2 (ATAURORA2); histone serine kinase(H3-S10 specific) / kinase [AT2G25880.1]	-1.31718
A_84_P820040	AT2G26560	PLP2 (PHOSPHOLIPASE A 2A); nutrient reservoir [AT2G26560.1]		1.07929
A_84_P584647	AT2G26610	similar to transducin family protein / WD-40 repeat family protein [Arabidopsis thaliana] (TAIR:AT3G33530.1); similar to hypothetical protein OsJ_005152 [Oryza sativa (japonica cultivar-group)] (GB:EAZ21669.1); similar to unnamed protein product [Vitis vinifera] (GB:CAO65690.1); similar to hypothetical protein OsI_005626 [Oryza sativa (indica cultivar-group)] (GB:EAY84393.1); contains InterPro do…		1.58796
A_84_P591780	AT2G26695	binding [AT2G26695.1]		-1.53259
A_84_P18220	AT2G27120	POL2B/TIL2 (TILTED2); DNA-directed DNA polymerase [AT2G27120.1]		2.53463
A_84_P758014	AT2G27150	AAO3 (ABSCISIC ALDEHYDE OXIDASE 3) [AT2G27150.2]	-1.48788
A_84_P541993	AT2G27310	F-box family protein [AT2G27310.1]		1.10272
A_84_P569474	AT2G27385	similar to unknown protein [Arabidopsis thaliana] (TAIR:AT5G22430.1); similar to hypothetical protein [Vitis vinifera] (GB:CAN68427.1) [AT2G27385.1]			-1.66904
A_84_P756150	AT2G27390	proline-rich family protein [AT2G27390.1]		1.7884
A_84_P757317	AT2G27400	TAS1A; other RNA [AT2G27400.1]		1.28263
A_84_P602463	AT2G27430	binding [AT2G27430.1]		1.20182
A_84_P503876	AT2G27660	DC1 domain-containing protein [AT2G27660.1]		2.97721	2.52623
A_84_P20120	AT2G27690	CYP94C1 (cytochrome P450, family 94, subfamily C, polypeptide 1); oxygen binding [AT2G27690.1]		1.53317
A_84_P240205	AT2G27840	HDT4 (histone deacetylase 13) [AT2G27840.1]		1.00506
A_84_P81579	AT2G28110	FRA8 (FRAGILE FIBER8); transferase [AT2G28110.1]		1.39055
A_84_P573065	AT2G28210	carbonic anhydrase family protein [AT2G28210.1]	2.83148
A_84_P255150	AT2G28410	similar to unknown protein [Arabidopsis thaliana] (TAIR:AT5G60650.1) [AT2G28410.1]			-1.90515
A_84_P10670	AT2G28550	RAP2.7/TOE1 (TARGET OF EAT1 1); DNA binding / transcription factor [AT2G28550.1]		-1.17116
A_84_P757473	AT2G28560	ATRAD51B/RAD51B [AT2G28560.2]	-1.18385
A_84_P12522	AT2G28710	zinc finger (C2H2 type) family protein [AT2G28710.1]		2.66545
A_84_P172261	AT2G28890	PLL4 (POLTERGEIST LIKE 4); protein serine/threonine phosphatase [AT2G28890.1]		1.82664	1.3533
A_84_P789454	AT2G28930	APK1B (Arabidopsis protein kinase 1B); kinase [AT2G28930.3]		1.78071	1.63098
A_84_P20183	AT2G29060	scarecrow transcription factor family protein [AT2G29060.1]		1.07397
A_84_P16334	AT2G29290	tropinone reductase, putative / tropine dehydrogenase, putative [AT2G29290.1]		-2.10761
A_84_P756013	AT2G29430	pseudogene, similar to LD32459p, contains Pfam profile PF04502: Family of unknown function (DUF572); blastp match of 50% identity and 4.6e-16 P-value to GP [AT2G29430.1]		1.47478
A_84_P22907	AT2G29630	thiamine biosynthesis family protein / thiC family protein [AT2G29630.1]	-1.09939	-1.19007
A_84_P515410	AT2G29995	similar to unknown protein [Arabidopsis thaliana] (TAIR:AT1G07175.1) [AT2G29995.1]		1.04525
A_84_P251865	AT2G30170	catalytic [AT2G30170.1]		-1.03312
A_84_P13438	AT2G30490	ATC4H/C4H/CYP73A5 (CINNAMATE 4-HYDROXYLASE, CINNAMATE-4-HYDROXYLASE); trans-cinnamate 4-monooxygenase [AT2G30490.1]		1.10192	1.10919
A_84_P12547	AT2G30750	CYP71A12 (CYTOCHROME P450, FAMILY 71, SUBFAMILY A, POLYPEPTIDE 12); oxygen binding [AT2G30750.1]		2.0329
A_84_P758588	AT2G30766	unknown protein [AT2G30766.1]			-1.81502
A_84_P17274	AT2G30790	PSBP-2 (photosystem II subunit P-2); calcium ion binding [AT2G30790.1]		-1.17521
A_84_P18256	AT2G30840	2-oxoglutarate-dependent dioxygenase, putative [AT2G30840.1]		1.62558
A_84_P23931	AT2G31020	oxysterol-binding family protein [AT2G31020.1]		1.24179
A_84_P231679	AT2G31040	ATP synthase protein I -related [AT2G31040.1]		-1.25533
A_84_P598030	AT2G31270	ATCDT1A/CDT1/CDT1A (ARABIDOPSIS HOMOLOG OF YEAST CDT1 A); cyclin-dependent protein kinase/ protein binding [AT2G31270.1]		1.17387
A_84_P757951	AT2G31335	similar to unknown protein [Arabidopsis thaliana] (TAIR:AT1G06137.1) [AT2G31335.1]		3.73629	4.58648
A_84_P826867	AT2G31730	ethylene-responsive protein, putative [AT2G31730.1]		-1.45478
A_84_P839424	AT2G32010	endonuclease/exonuclease/phosphatase family protein [AT2G32010.1]		-1.36434
A_84_P811686	AT2G32060	40S ribosomal protein S12 (RPS12C) [AT2G32060.3]		1.09662
A_84_P12616	AT2G32220	60S ribosomal protein L27 (RPL27A) [AT2G32220.1]		1.20709
A_84_P17269	AT2G32300	UCC1 (UCLACYANIN 1); copper ion binding [AT2G32300.1]	1.27538	1.51926
A_84_P16324	AT2G32400	GLR5 (Glutamate receptor 5) [AT2G32400.1]		1.46996
A_84_P201138	AT2G32470	F-box family protein-related [AT2G32470.1]		2.45384
A_84_P19214	AT2G32510	MAPKKK17 (Mitogen-activated protein kinase kinase kinase 17); kinase [AT2G32510.1]		-1.61127
A_84_P518964	AT2G32640	similar to Os08g0422000 [Oryza sativa (japonica cultivar-group)] (GB:NP_001061825.1); similar to unnamed protein product [Vitis vinifera] (GB:CAO24043.1); similar to CM0545.530.nc [Lotus japonicus] (GB:BAF98233.1); contains domain G3DSA:3.50.50.60 (G3DSA:3.50.50.60); contains domain SSF51905 (SSF51905) [AT2G32640.1]		-1.36251
A_84_P12550	AT2G32660	disease resistance family protein / LRR family protein [AT2G32660.1]	2.25749	3.5301	2.65748
A_84_P22006	AT2G32670	ATVAMP725 (Arabidopsis thaliana vesicle-associated membrane protein 725) [AT2G32670.1]		1.9413
A_84_P19168	AT2G32720	B5 #4 (cytochrome b5 family protein #4); heme binding / transition metal ion binding [AT2G32720.1]		1.03435
A_84_P23890	AT2G32960	tyrosine specific protein phosphatase family protein [AT2G32960.1]			1.10954
A_84_P22923	AT2G33020	leucine-rich repeat family protein [AT2G33020.1]	1.48357
A_84_P143149	AT2G33330	33 kDa secretory protein-related [AT2G33330.1]	-1.39155
A_84_P180484	AT2G33570	similar to unknown protein [Arabidopsis thaliana] (TAIR:AT5G44670.1); similar to unnamed protein product [Vitis vinifera] (GB:CAO66312.1); similar to hypothetical protein [Vitis vinifera] (GB:CAN76802.1); contains InterPro domain Protein of unknown function DUF23 (InterPro:IPR008166) [AT2G33570.1]		-1.47511
A_84_P73494	AT2G34090	MEE18 (maternal effect embryo arrest 18) [AT2G34090.2]	-1.00507
A_84_P149348	AT2G34170	similar to unknown protein [Arabidopsis thaliana] (TAIR:AT1G29240.1); similar to unnamed protein product [Vitis vinifera] (GB:CAO48048.1); contains InterPro domain Protein of unknown function DUF688 (InterPro:IPR007789) [AT2G34170.1]	-1.06922
A_84_P14490	AT2G34180	CIPK13 (SNF1-RELATED PROTEIN KINASE 3.7); kinase [AT2G34180.1]		3.69226
A_84_P565621	AT2G34240	pseudogene of unknown protein [AT2G34240.1]	-1.40313	-1.27223
A_84_P862752	AT2G34420	LHB1B2 (Photosystem II light harvesting complex gene 1.5); chlorophyll binding [AT2G34420.1]		-1.13292
A_84_P17286	AT2G34850	MEE25 (maternal effect embryo arrest 25); catalytic [AT2G34850.1]		-2.48633
A_84_P53500	AT2G35310	transcriptional factor B3 family protein [AT2G35310.1]		3.08082
A_84_P23855	AT2G35370	GDCH (Glycine decarboxylase complex H) [AT2G35370.1]		-1.29602
A_84_P281110	AT2G35730	heavy-metal-associated domain-containing protein [AT2G35730.1]		1.22273
A_84_P54670	AT2G35760	integral membrane family protein [AT2G35760.1]		-2.11002
A_84_P510106	AT2G35850	similar to unknown protein [Arabidopsis thaliana] (TAIR:AT3G52360.1); similar to unnamed protein product [Vitis vinifera] (GB:CAO39911.1) [AT2G35850.1]		1.72104
A_84_P18244	AT2G35910	zinc finger (C3HC4-type RING finger) family protein [AT2G35910.1]		2.28441	2.04233
A_84_P89769	AT2G35930	U-box domain-containing protein [AT2G35930.1]		1.68052	1.58156
A_84_P23919	AT2G35980	YLS9 (YELLOW-LEAF-SPECIFIC GENE 9) [AT2G35980.1]		1.09154
A_84_P544696	AT2G36110	3'-5' exonuclease domain-containing protein [AT2G36110.1]		-1.15812
A_84_P143889	AT2G36145	similar to unnamed protein product [Vitis vinifera] (GB:CAO15876.1); similar to hypothetical protein [Vitis vinifera] (GB:CAN74693.1) [AT2G36145.1]		-2.03823
A_84_P834955	AT2G36380	ATPDR6/PDR6 (PLEIOTROPIC DRUG RESISTANCE 6); ATPase, coupled to transmembrane movement of substances [AT2G36380.1]	1.08264
A_84_P586462	AT2G36485	similar to pre-mRNA cleavage complex-related [Arabidopsis thaliana] (TAIR:AT4G04885.1); similar to unnamed protein product [Vitis vinifera] (GB:CAO15965.1); contains InterPro domain ENTH/VHS (InterPro:IPR008942) [AT2G36485.1]		1.22322
A_84_P561511	AT2G36540	NLI interacting factor (NIF) family protein [AT2G36540.1]	-1.0488
A_84_P599827	AT2G36580	pyruvate kinase, putative [AT2G36580.1]		1.0083
A_84_P18221	AT2G36640	ATECP63 (EMBRYONIC CELL PROTEIN 63) [AT2G36640.1]		-2.64201
A_84_P13494	AT2G36690	oxidoreductase, 2OG-Fe(II) oxygenase family protein [AT2G36690.1]		4.18563	5.88194
A_84_P19166	AT2G36750	UGT72C1 (UDP-GLUCOSYL TRANSFERASE 72C1); UDP-glycosyltransferase/ transferase, transferring glycosyl groups [AT2G36750.1]	-2.72701
A_84_P807532	AT2G36830	GAMMA-TIP (Tonoplast intrinsic protein (TIP) gamma); water channel [AT2G36830.1]		-1.42759
A_84_P14471	AT2G36950	heavy-metal-associated domain-containing protein [AT2G36950.1]	1.44606	1.62957	1.39385
A_84_P809207	AT2G37040	PAL1 (PHE AMMONIA LYASE 1); phenylalanine ammonia-lyase [AT2G37040.1]	1.2859	1.42773	1.19262
A_84_P12515	AT2G37080	myosin heavy chain-related [AT2G37080.1]	-1.0919
A_84_P531393	AT2G37210	Encodes a protein of unknown function. It has been crystallized and shown to be structurally almost identical to the protein encoded by At5g11950. [AT2G37210.1]	-2.13857	-1.6393
A_84_P130216	AT2G37750	unknown protein [AT2G37750.1]		2.07005
A_84_P302850	AT2G37870	protease inhibitor/seed storage/lipid transfer protein (LTP) family protein [AT2G37870.1]		-2.33336
A_84_P576643	AT2G37950	zinc finger (C3HC4-type RING finger) family protein [AT2G37950.1]		-1.18507
A_84_P18263	AT2G38090	myb family transcription factor [AT2G38090.1]		-1.05542
A_84_P11645	AT2G38170	CAX1 (CATION EXCHANGER 1); calcium ion transmembrane transporter/ calcium:hydrogen antiporter [AT2G38170.1]		-1.5152
A_84_P837722	AT2G38255	similar to unknown protein [Arabidopsis thaliana] (TAIR:AT2G27320.1); similar to hypothetical protein 25.t00048 [Brassica oleracea] (GB:ABD64955.1); contains InterPro domain Protein of unknown function DUF239, plant (InterPro:IPR004314) [AT2G38255.1]		-1.37638
A_84_P225529	AT2G38480	integral membrane protein, putative [AT2G38480.1]		-1.31922
A_84_P21047	AT2G38530	LTP2 (LIPID TRANSFER PROTEIN 2); lipid binding [AT2G38530.1]	1.27026		1.14167
A_84_P568618	AT2G38823	similar to unknown protein [Arabidopsis thaliana] (TAIR:AT3G54520.1) [AT2G38823.1]		2.76394
A_84_P194694	AT2G38860	YLS5 (yellow-leaf-specific gene 5) [AT2G38860.1]		2.42197
A_84_P23913	AT2G38870	protease inhibitor, putative [AT2G38870.1]	1.93715	2.15455	2.22467
A_84_P301370	AT2G38890	similar to hypothetical protein [Vitis vinifera] (GB:CAN75604.1) [AT2G38890.1]		-1.44665
A_84_P793199	AT2G38940	ATPT2 (PHOSPHATE TRANSPORTER 2); carbohydrate transmembrane transporter/ phosphate transmembrane transporter/ sugar:hydrogen ion symporter [AT2G38940.1]	2.74198		2.94352
A_84_P14454	AT2G39040	peroxidase, putative [AT2G39040.1]			2.76621
A_84_P597160	AT2G39120	similar to unknown protein [Arabidopsis thaliana] (TAIR:AT3G58520.1); similar to unnamed protein product [Vitis vinifera] (GB:CAO68916.1); contains InterPro domain Protein of unknown function DUF860, plant (InterPro:IPR008578) [AT2G39120.1]		1.65024
A_84_P836887	AT2G39200	MLO12 (MILDEW RESISTANCE LOCUS O 12); calmodulin binding [AT2G39200.1]		1.78433	2.11925
A_84_P19220	AT2G39210	nodulin family protein [AT2G39210.1]		1.8633	1.92806
A_84_P817628	AT2G39330	jacalin lectin family protein [AT2G39330.1]	1.13814
A_84_P17328	AT2G39350	ABC transporter family protein [AT2G39350.1]		1.73703
A_84_P267240	AT2G39380	ATEXO70H2 (EXOCYST SUBUNIT EXO70 FAMILY PROTEIN H2); protein binding [AT2G39380.1]		3.93532	4.33411
A_84_P22060	AT2G39390	60S ribosomal protein L35 (RPL35B) [AT2G39390.1]		1.37891
A_84_P171963	AT2G39410	hydrolase, alpha/beta fold family protein [AT2G39410.1]		3.35715
A_84_P308593	AT2G39470	PPL2 (PSBP-LIKE PROTEIN 2); calcium ion binding [AT2G39470.1]		-1.8473
A_84_P834270	AT2G39490	F-box family protein [AT2G39490.1]		1.49372
A_84_P868076	AT2G39518	Identical to UPF0497 membrane protein At2g39518 [Arabidopsis Thaliana] (GB:Q56X75); similar to integral membrane protein, putative [Arabidopsis thaliana] (TAIR:AT2G39530.1); similar to hypothetical protein [Vitis vinifera] (GB:CAN64094.1); contains InterPro domain Conserved hypothetical protein CHP01569, trans-membrane plant (InterPro:IPR006459); contains InterPro domain Protein of unknown functi…	1.6003	2.01085	1.94635
A_84_P557103	AT2G39530	integral membrane protein, putative [AT2G39530.1]	2.23781	2.11076	2.64794
A_84_P834687	AT2G39850	subtilase [AT2G39850.1]		-1.16452
A_84_P507460	AT2G40113	similar to unknown protein [Arabidopsis thaliana] (TAIR:AT5G47635.1); similar to hypothetical protein 31.t00008 [Brassica oleracea] (GB:ABD65108.1) [AT2G40113.1]		1.62769
A_84_P97886	AT2G40130	heat shock protein-related [AT2G40130.1]		-1.4834
A_84_P10637	AT2G40170	ATEM6/GEA6 (ARABIDOPSIS EARLY METHIONINE-LABELLED 6) [AT2G40170.1]			2.11314
A_84_P524320	AT2G40475	unknown protein [AT2G40475.1]		-1.13137
A_84_P196604	AT2G40530	unknown protein [AT2G40530.1]		-1.37856
A_84_P11569	AT2G40610	ATEXPA8 (ARABIDOPSIS THALIANA EXPANSIN A8) [AT2G40610.1]		-3.58174
A_84_P21088	AT2G40670	ARR16 (response regulator 16); transcription regulator/ two-component response regulator [AT2G40670.1]		-1.07868
A_84_P17305	AT2G40740	WRKY55 (WRKY DNA-binding protein 55); transcription factor [AT2G40740.1]		1.74135
A_84_P547370	AT2G40860	protein kinase family protein / protein phosphatase 2C ( PP2C) family protein [AT2G40860.1]		-1.09746
A_84_P813707	AT2G40890	CYP98A3 (CYTOCHROME P450, FAMILY 98, SUBFAMILY A, POLYPEPTIDE 3); monooxygenase/ p-coumarate 3-hydroxylase [AT2G40890.1]	1.14157	1.24799	1.09263
A_84_P846994	AT2G40900	nodulin MtN21 family protein [AT2G40900.1]		-1.03117
A_84_P19147	AT2G40970	myb family transcription factor [AT2G40970.1]		-1.04635
A_84_P124252	AT2G41010	ATCAMBP25 (ARABIDOPSIS THALIANA CALMODULIN (CAM)-BINDING PROTEIN OF 25 KDA); calmodulin binding [AT2G41010.1]		1.35439
A_84_P173611	AT2G41170	F-box family protein [AT2G41170.1]		1.02485
A_84_P108542	AT2G41180	sigA-binding protein-related [AT2G41180.1]		1.11839
A_84_P21050	AT2G41280	M10 [AT2G41280.1]		-1.15309
A_84_P758412	AT2G41342	similar to unknown [Picea sitchensis] (GB:ABK27016.1) [AT2G41342.1]		1.34817
A_84_P755266	AT2G41450	N-acetyltransferase [AT2G41450.1]	-1.11594
A_84_P826049	AT2G41990	similar to unknown protein [Arabidopsis thaliana] (TAIR:AT4G35170.1); similar to hypothetical protein [Vitis vinifera] (GB:CAN73167.1) [AT2G41990.1]	-3.17267
A_84_P231139	AT2G42060	CHP-rich zinc finger protein, putative [AT2G42060.1]		5.06483	4.78276
A_84_P19111	AT2G42090	ACT9 (ACTIN 9); structural constituent of cytoskeleton [AT2G42090.1]		-1.37204
A_84_P581112	AT2G42150	DNA-binding bromodomain-containing protein [AT2G42150.1]	-1.05803
A_84_P55980	AT2G42280	basic helix-loop-helix (bHLH) family protein [AT2G42280.1]		1.05589
A_84_P13546	AT2G42360	zinc finger (C3HC4-type RING finger) family protein [AT2G42360.1]		1.44425	1.43602
A_84_P257180	AT2G42380	bZIP transcription factor family protein [AT2G42380.1]		-1.88986
A_84_P23852	AT2G42540	COR15A (COLD-REGULATED 15A) [AT2G42540.1]		-1.57199
A_84_P805813	AT2G42840	PDF1 (PROTODERMAL FACTOR 1) [AT2G42840.1]	-2.6423	4.38129	-2.41233
A_84_P164223	AT2G42870	HLH1/PAR1 (PHY RAPIDLY REGULATED 1); transcription regulator [AT2G42870.1]	-1.99615
A_84_P22670	AT2G42955	similar to unknown protein [Arabidopsis thaliana] (TAIR:AT2G30615.1); similar to F-box domain containing protein [Brassica oleracea] (GB:ABD65166.1) [AT2G42955.1]	-1.42895
A_84_P838362	AT2G43140	DNA binding / transcription factor [AT2G43140.1]		1.56885
A_84_P722142	AT2G43375	other RNA [AT2G43375.1]		1.39563
A_84_P21958	AT2G43510	ATTI1 (ARABIDOPSIS THALIANA TRYPSIN INHIBITOR PROTEIN 1) [AT2G43510.1]	1.43066	1.39266
A_84_P20061	AT2G43580	chitinase, putative [AT2G43580.1]			1.31551
A_84_P16277	AT2G43610	glycoside hydrolase family 19 protein [AT2G43610.1]	1.15265		2.45254
A_84_P15331	AT2G43620	chitinase, putative [AT2G43620.1]			2.18847
A_84_P787961	AT2G43730	lectin-related [AT2G43730.1]			1.32892
A_84_P23844	AT2G43870	polygalacturonase, putative / pectinase, putative [AT2G43870.1]		1.7212
A_84_P512786	AT2G44010	similar to unknown protein [Arabidopsis thaliana] (TAIR:AT3G59880.1) [AT2G44010.1]		1.39337
A_84_P22035	AT2G44070	GTP binding / translation initiation factor [AT2G44070.1]		2.32684
A_84_P77129	AT2G44370	DC1 domain-containing protein [AT2G44370.1]		3.00919	3.60905
A_84_P832916	AT2G44380	DC1 domain-containing protein [AT2G44380.1]		3.27502	3.32439
A_84_P22019	AT2G44390	DC1 domain-containing protein [AT2G44390.1]		3.35621	3.33646
A_84_P223829	AT2G44670	senescence-associated protein-related [AT2G44670.1]		1.23979
A_84_P20176	AT2G44790	UCC2 (UCLACYANIN 2); copper ion binding [AT2G44790.1]		3.16353
A_84_P17343	AT2G44840	ATERF13/EREBP (ETHYLENE-RESPONSIVE ELEMENT BINDING FACTOR 13); DNA binding / transcription factor [AT2G44840.1]		-1.46766
A_84_P11627	AT2G45040	matrix metalloproteinase [AT2G45040.1]			1.26638
A_84_P15361	AT2G45220	pectinesterase family protein [AT2G45220.1]	2.56758	2.62824	2.56614
A_84_P176164	AT2G45300	3-phosphoshikimate 1-carboxyvinyltransferase / 5-enolpyruvylshikimate-3-phosphate / EPSP synthase [AT2G45300.1]		1.42766	1.03167
A_84_P88159	AT2G45360	similar to unknown protein [Arabidopsis thaliana] (TAIR:AT3G60780.1); similar to unnamed protein product [Vitis vinifera] (GB:CAO24498.1); contains InterPro domain Protein of unknown function DUF1442 (InterPro:IPR009902) [AT2G45360.1]		3.39187	3.0758
A_84_P16308	AT2G45400	BEN1; oxidoreductase, acting on CH-OH group of donors [AT2G45400.1]		-1.25431
A_84_P22955	AT2G45490	ATAUR3 (ATAURORA3); ATP binding / histone serine kinase(H3-S10 specific) / protein kinase [AT2G45490.1]	-1.07418
A_84_P561544	AT2G45560	CYP76C1 (cytochrome P450, family 76, subfamily C, polypeptide 1); heme binding / iron ion binding / monooxygenase [AT2G45560.1]		-1.3618
A_84_P120202	AT2G45600	hydrolase [AT2G45600.1]	-1.20806
A_84_P581125	AT2G45610	hydrolase [AT2G45610.1]	-2.05933
A_84_P846147	AT2G45720	armadillo/beta-catenin repeat family protein [AT2G45720.1]		-1.00502
A_84_P15445	AT2G45960	PIP1B (plasma membrane intrinsic protein 1;2); water channel [AT2G45960.1]		-1.14308
A_84_P12510	AT2G46070	ATMPK12 (Arabidopsis thaliana MAP kinase 12); MAP kinase/ kinase [AT2G46070.1]		-1.00755
A_84_P542948	AT2G46150	similar to unknown protein [Arabidopsis thaliana] (TAIR:AT3G54200.1); similar to plant cell wall protein SlTFR88 [Lycopersicon esculentum] (GB:ABF39005.1); contains InterPro domain Harpin-induced 1 (InterPro:IPR010847) [AT2G46150.1]		1.34023
A_84_P17238	AT2G46290	eukaryotic translation initiation factor 3 subunit 2, putative / eIF-3 beta, putative / eIF3i, putative [AT2G46290.1]	-1.07947
A_84_P23898	AT2G46660	CYP78A6 (cytochrome P450, family 78, subfamily A, polypeptide 6); oxygen binding [AT2G46660.1]		-1.57242
A_84_P81599	AT2G46750	FAD-binding domain-containing protein [AT2G46750.1]		1.45164
A_84_P807767	AT2G46820	PSAP/PSI-P/PTAC8/TMP14 (THYLAKOID MEMBRANE PHOSPHOPROTEIN OF 14 KDA); DNA binding [AT2G46820.1]		-1.41767
A_84_P19241	AT2G46830	CCA1 (CIRCADIAN CLOCK ASSOCIATED 1); transcription factor [AT2G46830.1]		-1.02714
A_84_P21132	AT2G46950	CYP709B2 (cytochrome P450, family 709, subfamily B, polypeptide 2); oxygen binding [AT2G46950.1]	-1.27171	-1.20967
A_84_P521683	AT2G46970	PIL1 (PHYTOCHROME INTERACTING FACTOR 3-LIKE 1); transcription factor [AT2G46970.1]		-1.52575
A_84_P17348	AT2G47000	MDR4/PGP4 (P-GLYCOPROTEIN4); ATPase, coupled to transmembrane movement of substances / xenobiotic-transporting ATPase [AT2G47000.1]		1.12868
A_84_P12621	AT2G47060	serine/threonine protein kinase, putative [AT2G47060.1]		-1.20678
A_84_P23024	AT2G47140	short-chain dehydrogenase/reductase (SDR) family protein [AT2G47140.1]		1.59031	1.42008
A_84_P19116	AT2G47260	WRKY23 (WRKY DNA-binding protein 23); transcription factor [AT2G47260.1]		-1.2939
A_84_P15357	AT2G47500	microtubule motor [AT2G47500.1]		-1.39969
A_84_P22924	AT2G47550	pectinesterase family protein [AT2G47550.1]	1.96876	1.42523	1.76749
A_84_P809187	AT2G47630	esterase/lipase/thioesterase family protein [AT2G47630.1]		1.03872	1.86973
A_84_P10636	AT2G47670	invertase/pectin methylesterase inhibitor family protein [AT2G47670.1]	-1.13727	-1.04413
A_84_P855789	AT2G47730	ATGSTF8 (GLUTATHIONE S-TRANSFERASE 8); glutathione transferase [AT2G47730.1]		1.05507
A_84_P257260	AT2G47780	rubber elongation factor (REF) protein-related [AT2G47780.1]		-2.43915
A_84_P11580	AT2G47870	glutaredoxin family protein [AT2G47870.1]		-1.82095
A_84_P13470	AT2G47890	zinc finger (B-box type) family protein [AT2G47890.1]	-1.09627
A_84_P514578	AT2G48040	similar to unnamed protein product [Vitis vinifera] (GB:CAO22459.1); contains domain PTHR13167:SF2 (PTHR13167:SF2); contains domain PTHR13167 (PTHR13167) [AT2G48040.1]		-1.02425
A_84_P23975	AT3G01080	WRKY58 (WRKY DNA-binding protein 58); transcription factor [AT3G01080.1]		1.08325
A_84_P226169	AT3G01440	oxygen evolving enhancer 3 (PsbQ) family protein [AT3G01440.1]		-1.91263
A_84_P850677	AT3G01500	CA1 (CARBONIC ANHYDRASE 1); carbonate dehydratase/ zinc ion binding [AT3G01500.2]		-1.48587
A_84_P585620	AT3G01513	similar to unknown protein [Arabidopsis thaliana] (TAIR:AT5G14730.1); similar to hypothetical protein [Vitis vinifera] (GB:CAN65788.1) [AT3G01513.1]		1.47826	1.67962
A_84_P19248	AT3G01550	triose phosphate/phosphate translocator, putative [AT3G01550.1]		-1.13857
A_84_P603421	AT3G01960	unknown protein [AT3G01960.1]		-2.2049
A_84_P843286	AT3G01990	ACR6 (ACT Domain Repeat 6) [AT3G01990.1]			1.12896
A_84_P610533	AT3G02030	hydrolase, alpha/beta fold family protein [AT3G02030.1]	1.39756
A_84_P181994	AT3G02040	SRG3 (SENESCENCE-RELATED GENE 3); glycerophosphodiester phosphodiesterase [AT3G02040.1]	1.89145	1.25872	1.77644
A_84_P20197	AT3G02190	60S ribosomal protein L39 (RPL39B) [AT3G02190.1]		1.05033
A_84_P18305	AT3G02230	RGP1 (REVERSIBLY GLYCOSYLATED POLYPEPTIDE 1) [AT3G02230.1]		1.54517	1.12784
A_84_P550058	AT3G02240	similar to unknown protein [Arabidopsis thaliana] (TAIR:AT3G02242.1) [AT3G02240.1]		4.32466
A_84_P762727	AT3G02242	similar to unknown protein [Arabidopsis thaliana] (TAIR:AT3G02240.1) [AT3G02242.1]		3.84565
A_84_P12633	AT3G02270	eIF4-gamma/eIF5/eIF2-epsilon domain-containing protein [AT3G02270.1]		2.88735	1.98681
A_84_P20292	AT3G02380	COL2 (CONSTANS-LIKE 2); transcription factor/ zinc ion binding [AT3G02380.1]		-2.18531
A_84_P809488	AT3G02470	SAMDC (S-ADENOSYLMETHIONINE DECARBOXYLASE) [AT3G02470.3]		1.19388
A_84_P546516	AT3G02490	pentatricopeptide (PPR) repeat-containing protein [AT3G02490.1]		1.17626
A_84_P540304	AT3G02500	similar to unknown protein [Arabidopsis thaliana] (TAIR:AT5G16030.1); similar to hypothetical protein [Cleome spinosa] (GB:ABD96956.1) [AT3G02500.1]		-1.11004
A_84_P245345	AT3G02690	integral membrane family protein [AT3G02690.1]		-1.11575
A_84_P18330	AT3G02730	ATF1/TRXF1 (THIOREDOXIN F-TYPE 1); thiol-disulfide exchange intermediate [AT3G02730.1]		-1.4069
A_84_P23059	AT3G02850	SKOR (stelar K+ outward rectifier); cyclic nucleotide binding / outward rectifier potassium channel [AT3G02850.1]	-1.0689
A_84_P21167	AT3G02875	ILR1 (IAA-LEUCINE RESISTANT 1); metallopeptidase [AT3G02875.1]			1.11964
A_84_P10767	AT3G02990	ATHSFA1E (Arabidopsis thaliana heat shock transcription factor A1E); DNA binding / transcription factor [AT3G02990.1]	-1.12553
A_84_P762197	AT3G03341	similar to Os01g0644200 [Oryza sativa (japonica cultivar-group)] (GB:NP_001043697.1); similar to unknown [Picea sitchensis] (GB:ABK22613.1) [AT3G03341.1]		-1.20407
A_84_P788639	AT3G03770	leucine-rich repeat transmembrane protein kinase, putative [AT3G03770.1]		-1.17091
A_84_P10758	AT3G04070	ANAC047 (Arabidopsis NAC domain containing protein 47); transcription factor [AT3G04070.1]		1.60897
A_84_P16440	AT3G04140	ankyrin repeat family protein [AT3G04140.1]		-1.01506
A_84_P12659	AT3G04200	germin-like protein, putative [AT3G04200.1]	-1.67578
A_84_P86799	AT3G04380	SUVR4; histone-lysine N-methyltransferase [AT3G04380.1]	-1.00231	-1.19812	-1.00364
A_84_P18331	AT3G04530	PPCK2 (PHOSPHOENOLPYRUVATE CARBOXYLASE KINASE 2); kinase [AT3G04530.1]			1.692
A_84_P20212	AT3G04710	ankyrin repeat family protein [AT3G04710.1]		1.02994
A_84_P825740	AT3G04770	RPSAB (40S RIBOSOMAL PROTEIN SA B); structural constituent of ribosome [AT3G04770.1]		1.17034
A_84_P761256	AT3G04945	LCR18 (Low-molecular-weight cysteine-rich 18) [AT3G04945.1]		2.26191	1.27759
A_84_P10735	AT3G05060	SAR DNA-binding protein, putative [AT3G05060.1]		1.03563
A_84_P14516	AT3G05360	disease resistance family protein / LRR family protein [AT3G05360.1]		2.2165
A_84_P502161	AT3G05390	similar to unknown protein [Arabidopsis thaliana] (TAIR:AT4G01240.1); similar to unnamed protein product [Vitis vinifera] (GB:CAO17562.1); similar to hypothetical protein [Vitis vinifera] (GB:CAN77378.1); contains domain SSF53335 (SSF53335); contains domain PROKAR_LIPOPROTEIN (PS51257) [AT3G05390.1]		1.17087
A_84_P23992	AT3G05640	protein phosphatase 2C, putative / PP2C, putative [AT3G05640.1]		-1.64188
A_84_P852482	AT3G05660	kinase/ protein binding [AT3G05660.1]		1.38142
A_84_P90109	AT3G05800	transcription factor [AT3G05800.1]		-1.70233
A_84_P117182	AT3G05890	RCI2B (RARE-COLD-INDUCIBLE 2B) [AT3G05890.1]		-1.32068
A_84_P599886	AT3G06145	similar to unnamed protein product [Vitis vinifera] (GB:CAO71096.1) [AT3G06145.1]	-1.8247
A_84_P788572	AT3G06150	similar to unknown protein [Arabidopsis thaliana] (TAIR:AT5G19060.1); similar to unnamed protein product [Vitis vinifera] (GB:CAO71094.1); contains InterPro domain Immunoglobulin E-set (InterPro:IPR014756) [AT3G06150.1]		-1.07143
A_84_P562958	AT3G06220	DNA binding / transcription factor [AT3G06220.1]		3.88997
A_84_P18334	AT3G06490	MYB108 (MYB DOMAIN PROTEIN 108); DNA binding / transcription factor [AT3G06490.1]		1.19008
A_84_P87399	AT3G06520	agenet domain-containing protein [AT3G06520.1]		-1.24787
A_84_P761249	AT3G06985	LCR44 (Low-molecular-weight cysteine-rich 44) [AT3G06985.1]		-1.28977
A_84_P761578	AT3G06995	Encodes a Defensin-like (DEFL) family protein [pseudogene] [AT3G06995.1]		-1.27759
A_84_P18319	AT3G07200	zinc finger (C3HC4-type RING finger) family protein [AT3G07200.1]	-1.06933
A_84_P575806	AT3G07380	similar to unknown protein [Arabidopsis thaliana] (TAIR:AT3G60990.1); similar to unknown protein [Arabidopsis thaliana] (TAIR:AT5G48190.1); similar to unknown [Populus trichocarpa] (GB:ABK94817.1); contains InterPro domain Protein of unknown function DUF23 (InterPro:IPR008166) [AT3G07380.1]		-1.10676
A_84_P804827	AT3G07390	AIR12 (Auxin-Induced in Root cultures 12); extracellular matrix structural constituent [AT3G07390.1]		2.23679	1.8404
A_84_P12654	AT3G07670	SET domain-containing protein [AT3G07670.1]	-1.03725
A_84_P831886	AT3G07770	ATP binding [AT3G07770.1]		1.09756	1.12185
A_84_P12655	AT3G07970	polygalacturonase, putative / pectinase, putative [AT3G07970.1]		2.42834
A_84_P22110	AT3G08770	LTP6 (Lipid transfer protein 6); lipid binding [AT3G08770.1]		4.46611
A_84_P574921	AT3G08810	kelch repeat-containing F-box family protein [AT3G08810.1]		1.01824
A_84_P176534	AT3G08920	rhodanese-like domain-containing protein [AT3G08920.1]		-1.20514
A_84_P23977	AT3G09010	protein kinase family protein [AT3G09010.1]		1.07017
A_84_P509282	AT3G09100	mRNA capping enzyme family protein [AT3G09100.1]		1.33959
A_84_P760525	AT3G09330	amino acid transporter family protein [AT3G09330.1]		2.91133
A_84_P530576	AT3G09340	amino acid transporter family protein [AT3G09340.1]		3.33365
A_84_P271340	AT3G09350	armadillo/beta-catenin repeat family protein [AT3G09350.1]		1.30823
A_84_P532349	AT3G09520	ATEXO70H4 (exocyst subunit EXO70 family protein H4); protein binding [AT3G09520.1]		1.02407
A_84_P11707	AT3G09580	amine oxidase family protein [AT3G09580.1]		-1.28988
A_84_P17379	AT3G09640	APX2 (ASCORBATE PEROXIDASE 2); L-ascorbate peroxidase [AT3G09640.1]	-1.88153
A_84_P16437	AT3G09870	auxin-responsive family protein [AT3G09870.1]		-1.97479
A_84_P18315	AT3G09940	ATMDAR3/MDHAR (MONODEHYDROASCORBATE REDUCTASE); monodehydroascorbate reductase (NADH) [AT3G09940.1]		1.97584
A_84_P555382	AT3G09950	similar to unknown protein [Arabidopsis thaliana] (TAIR:AT5G55620.1); similar to unknown protein [Arabidopsis thaliana] (TAIR:AT3G55570.1); similar to unnamed protein product [Vitis vinifera] (GB:CAO39940.1) [AT3G09950.1]		4.34632	4.70974
A_84_P17369	AT3G09960	calcineurin-like phosphoesterase family protein [AT3G09960.1]	1.25809	2.02682
A_84_P21141	AT3G10200	dehydration-responsive protein-related [AT3G10200.1]	-1.56819
A_84_P856887	AT3G10985	SAG20 (WOUND-INDUCED PROTEIN 12) [AT3G10985.1]	1.01569
A_84_P760741	AT3G11010	disease resistance family protein / LRR family protein [AT3G11010.1]		1.10719
A_84_P822840	AT3G11340	UDP-glucoronosyl/UDP-glucosyl transferase family protein [AT3G11340.1]		1.99065
A_84_P312153	AT3G11430	ATGPAT5/GPAT5 (GLYCEROL-3-PHOSPHATE ACYLTRANSFERASE 5); 1-acylglycerol-3-phosphate O-acyltransferase/ acyltransferase/ organic anion transmembrane transporter [AT3G11430.1]		1.30635
A_84_P234289	AT3G11560	similar to unknown protein [Arabidopsis thaliana] (TAIR:AT5G06220.1); similar to unnamed protein product [Vitis vinifera] (GB:CAO15863.1) [AT3G11560.1]		1.35219
A_84_P18401	AT3G12580	HSP70 (heat shock protein 70); ATP binding [AT3G12580.1]		1.36942
A_84_P17455	AT3G12610	DRT100 (DNA-DAMAGE REPAIR/TOLERATION 100); protein binding [AT3G12610.1]		-1.77626
A_84_P23094	AT3G12860	nucleolar protein Nop56, putative [AT3G12860.1]		1.49031
A_84_P21737	AT3G13065	SRF4 (STRUBBELIG-RECEPTOR FAMILY 4); ATP binding / kinase/ protein serine/threonine kinase [AT3G13065.1]		-1.02104
A_84_P245905	AT3G13230	RNA binding [AT3G13230.1]		1.16688
A_84_P761767	AT3G13432	unknown protein [AT3G13432.1]	1.71806	2.15305
A_84_P535912	AT3G13500	similar to unknown protein [Arabidopsis thaliana] (TAIR:AT1G55365.1) [AT3G13500.1]	1.52506	2.35507	1.92969
A_84_P19339	AT3G13650	disease resistance response [AT3G13650.1]		-1.56906
A_84_P14610	AT3G13782	NAP1;4 (NUCLEOSOME ASSEMBLY PROTEIN1;4); DNA binding [AT3G13782.1]		1.07387
A_84_P17447	AT3G13790	ATBFRUCT1/ATCWINV1 (ARABIDOPSIS THALIANA CELL WALL INVERTASE 1); beta-fructofuranosidase/ hydrolase, hydrolyzing O-glycosyl compounds [AT3G13790.1]		1.95055
A_84_P111702	AT3G13940	DNA binding / DNA-directed RNA polymerase [AT3G13940.1]		1.08367
A_84_P831744	AT3G14000	ATBRXL2/BRX-LIKE2 [AT3G14000.2]		-1.07747
A_84_P119322	AT3G14060	similar to unknown protein [Arabidopsis thaliana] (TAIR:AT1G54120.1); similar to unnamed protein product [Vitis vinifera] (GB:CAO45609.1) [AT3G14060.1]		1.32786
A_84_P12281	AT3G14225	GLIP4; carboxylesterase [AT3G14225.1]			2.16359
A_84_P14557	AT3G14350	SRF7 (STRUBBELIG-RECEPTOR FAMILY 7); ATP binding / protein serine/threonine kinase [AT3G14350.1]		-1.16314
A_84_P828773	AT3G14360	lipase class 3 family protein [AT3G14360.1]		-1.62195
A_84_P17007	AT3G14415	(S)-2-hydroxy-acid oxidase, peroxisomal, putative / glycolate oxidase, putative / short chain alpha-hydroxy acid oxidase, putative [AT3G14415.1]	-1.00558	-1.18992
A_84_P260570	AT3G14700	similar to SART-1 family protein [Arabidopsis thaliana] (TAIR:AT5G16780.1); similar to hypothetical protein OsJ_006675 [Oryza sativa (japonica cultivar-group)] (GB:EAZ23192.1); similar to Os02g0511500 [Oryza sativa (japonica cultivar-group)] (GB:NP_001046936.1); similar to hypothetical protein OsI_007241 [Oryza sativa (indica cultivar-group)] (GB:EAY86008.1); contains InterPro domain SART-1 prote…		1.22479
A_84_P503581	AT3G14880	similar to DOG1 (DELAY OF GERMINATION 1) [Arabidopsis thaliana] (TAIR:AT5G45830.1); similar to tumor-related protein-like, putative [Medicago truncatula] (GB:ABD32966.1) [AT3G14880.1]		-1.7027
A_84_P594570	AT3G15240	similar to unknown protein [Arabidopsis thaliana] (TAIR:AT5G53900.2); similar to unnamed protein product [Vitis vinifera] (GB:CAO39314.1); contains domain gb def: At3g15240 (PTHR13902:SF3); contains domain SERINE/THREONINE-PROTEIN KINASE WNK (WITH NO LYSINE)-RELATED (PTHR13902) [AT3G15240.2]	-1.56619
A_84_P102366	AT3G15280	similar to unnamed protein product [Vitis vinifera] (GB:CAO66421.1) [AT3G15280.1]		-2.18903
A_84_P834058	AT3G15340	PPI2 (PROTON PUMP INTERACTOR 2) [AT3G15340.1]		1.71842
A_84_P762419	AT3G15518	similar to hypothetical protein [Nicotiana benthamiana] (GB:BAF02554.1) [AT3G15518.1]		1.03724
A_84_P818968	AT3G15630	similar to unknown protein [Arabidopsis thaliana] (TAIR:AT1G52720.1); similar to unnamed protein product [Vitis vinifera] (GB:CAO46032.1); similar to hypothetical protein [Vitis vinifera] (GB:CAN71657.1) [AT3G15630.1]	1.48649
A_84_P11727	AT3G15670	late embryogenesis abundant protein, putative / LEA protein, putative [AT3G15670.1]	-3.65884	-4.15111
A_84_P112392	AT3G15950	(TSA1-LIKE); protein binding [AT3G15950.1]		1.06801
A_84_P19307	AT3G15960	DNA mismatch repair MutS family protein [AT3G15960.1]		2.52093
A_84_P11724	AT3G16150	L-asparaginase, putative / L-asparagine amidohydrolase, putative [AT3G16150.1]		1.15398
A_84_P10789	AT3G16250	ferredoxin-related [AT3G16250.1]		-1.02545
A_84_P201258	AT3G16280	DNA binding / transcription factor [AT3G16280.1]		2.28409
A_84_P801437	AT3G16370	GDSL-motif lipase/hydrolase family protein [AT3G16370.1]		-1.21219
A_84_P812126	AT3G16400	ATMLP-470 (MYROSINASE-BINDING PROTEIN-LIKE PROTEIN-470) [AT3G16400.1]	1.09168
A_84_P152498	AT3G16570	RALFL23 (RALF-LIKE 23) [AT3G16570.1]		-1.26324
A_84_P19303	AT3G17070	peroxidase, putative [AT3G17070.1]		-1.02104
A_84_P558950	AT3G17130	invertase/pectin methylesterase inhibitor family protein [AT3G17130.1]		-1.97152
A_84_P21196	AT3G17720	pyridoxal-dependent decarboxylase family protein [AT3G17720.1]		-1.6792
A_84_P613251	AT3G18250	contains domain PROKAR_LIPOPROTEIN (PS51257) [AT3G18250.1]		2.69016
A_84_P16471	AT3G18450	similar to unknown protein [Arabidopsis thaliana] (TAIR:AT3G18460.1); similar to unnamed protein product [Vitis vinifera] (GB:CAO68031.1); contains InterPro domain Protein of unknown function Cys-rich (InterPro:IPR006461) [AT3G18450.1]		1.34379
A_84_P17417	AT3G18460	similar to unknown protein [Arabidopsis thaliana] (TAIR:AT3G18450.1); similar to unnamed protein product [Vitis vinifera] (GB:CAO68031.1); contains InterPro domain Protein of unknown function Cys-rich (InterPro:IPR006461) [AT3G18460.1]	1.42348	1.60235
A_84_P24037	AT3G18830	ATPLT5 (POLYOL TRANSPORTER 5); D-ribose transmembrane transporter/ D-xylose transmembrane transporter/ carbohydrate transmembrane transporter/ galactose transmembrane transporter/ glucose transmembrane transporter/ glycerol transmembrane transporter/ hydr [AT3G18830.1]		1.1897
A_84_P821587	AT3G18850	LPAT5 [AT3G18850.4]	-1.84018
A_84_P143099	AT3G18890	binding / catalytic/ coenzyme binding [AT3G18890.1]			-1.68425
A_84_P301400	AT3G18950	transducin family protein / WD-40 repeat family protein [AT3G18950.1]		1.07151
A_84_P836351	AT3G19230	leucine-rich repeat family protein [AT3G19230.1]		-1.31186
A_84_P120712	AT3G19360	zinc finger (CCCH-type) family protein [AT3G19360.1]		1.0621
A_84_P18353	AT3G19450	CAD4 (CINNAMYL ALCOHOL DEHYDROGENASE 4); cinnamyl-alcohol dehydrogenase [AT3G19450.1]			1.17101
A_84_P792060	AT3G19615	unknown protein [AT3G19615.1]	1.60352	2.46622
A_84_P50620	AT3G19720	ARC5 (ACCUMULATION AND REPLICATION OF CHLOROPLAST 5); GTP binding / GTPase [AT3G19720.1]		-1.00513
A_84_P293484	AT3G19800	similar to unnamed protein product [Vitis vinifera] (GB:CAO15360.1) [AT3G19800.1]		-1.31387
A_84_P587454	AT3G19850	phototropic-responsive NPH3 family protein [AT3G19850.1]		-1.603
A_84_P304550	AT3G19920	similar to unknown protein [Arabidopsis thaliana] (TAIR:AT5G64230.1); similar to unnamed protein product [Vitis vinifera] (GB:CAO44392.1) [AT3G19920.1]		2.64128
A_84_P202108	AT3G20015	pepsin A [AT3G20015.1]			-1.00939
A_84_P14595	AT3G20110	CYP705A20 (cytochrome P450, family 705, subfamily A, polypeptide 20); oxygen binding [AT3G20110.1]		2.59775
A_84_P841569	AT3G20300	extracellular ligand-gated ion channel [AT3G20300.1]	-1.40335	-1.70735
A_84_P18366	AT3G20470	encodes a glycine-rich protein that is expressed more abundantly in immature seed pods than in stems and leaves. Expression is not detected in roots or flowers. [AT3G20470.1]	1.2673	1.27653	1.47755
A_84_P16492	AT3G21150	zinc finger (B-box type) family protein [AT3G21150.1]	-1.12553
A_84_P18352	AT3G21230	4CL5 (4-COUMARATE:COA LIGASE 5); 4-coumarate-CoA ligase [AT3G21230.1]		1.39455
A_84_P761907	AT3G21352	unknown protein [AT3G21352.1]		3.19829
A_84_P761404	AT3G21460	electron carrier/ protein disulfide oxidoreductase [AT3G21460.1]		-1.51343
A_84_P521758	AT3G21480	similar to BRCT domain-containing protein [Arabidopsis thaliana] (TAIR:AT4G03130.1); similar to unnamed protein product [Vitis vinifera] (GB:CAO71038.1); contains InterPro domain BRCT; (InterPro:IPR001357) [AT3G21480.1]		1.25356
A_84_P591022	AT3G21530	endonuclease/exonuclease/phosphatase family protein [AT3G21530.1]	1.53718	1.45884	1.49358
A_84_P761848	AT3G21755	other RNA [AT3G21755.1]		-1.44281
A_84_P18355	AT3G21760	UDP-glucoronosyl/UDP-glucosyl transferase family protein [AT3G21760.1]		-1.53471
A_84_P15534	AT3G21900	receptor-like protein kinase-related [AT3G21900.1]	1.87791	2.13542
A_84_P168633	AT3G21920	pollen coat receptor kinase, putative [AT3G21920.1]	2.09598	2.29621
A_84_P311453	AT3G21930	receptor-like protein kinase-related [AT3G21930.1]	1.87603	2.08684
A_84_P19318	AT3G22060	receptor protein kinase-related [AT3G22060.1]	1.5707	1.71737	1.97943
A_84_P600829	AT3G22410	similar to unknown protein [Arabidopsis thaliana] (TAIR:AT1G05370.1); similar to unnamed protein product [Vitis vinifera] (GB:CAO71162.1); contains InterPro domain Cellular retinaldehyde-binding/triple function, C-terminal (InterPro:IPR001251); contains InterPro domain Phosphatidylinositol transfer protein-like, N-terminal (InterPro:IPR011074) [AT3G22410.1]		1.0375
A_84_P608809	AT3G22510	similar to unknown protein [Arabidopsis thaliana] (TAIR:AT5G27990.1); similar to unnamed protein product [Vitis vinifera] (GB:CAO71182.1); contains domain PTHR21250 (PTHR21250) [AT3G22510.1]		1.27374
A_84_P230859	AT3G22550	senescence-associated protein-related [AT3G22550.1]	-1.27405
A_84_P784627	AT3G22750	protein kinase, putative [AT3G22750.1]		1.07753	1.10017
A_84_P16449	AT3G22840	ELIP1 (EARLY LIGHT-INDUCABLE PROTEIN); chlorophyll binding [AT3G22840.1]		-1.7812
A_84_P761148	AT3G22886	MIR167A; miRNA [AT3G22886.1]	1.01653
A_84_P20248	AT3G23230	ethylene-responsive factor, putative [AT3G23230.1]			1.67608
A_84_P304480	AT3G23510	cyclopropane fatty acid synthase, putative / CPA-FA synthase, putative [AT3G23510.1]		1.25394
A_84_P292144	AT3G23550	MATE efflux family protein [AT3G23550.1]		1.23206
A_84_P16484	AT3G23700	S1 RNA-binding domain-containing protein [AT3G23700.1]		-1.29527
A_84_P64294	AT3G23790	AMP-binding protein, putative [AT3G23790.1]			1.16233
A_84_P19333	AT3G23840	transferase family protein [AT3G23840.1]		-1.0501
A_84_P11769	AT3G23990	HSP60 (Heat shock protein 60); ATP binding / protein binding / unfolded protein binding [AT3G23990.1]		1.54231
A_84_P760818	AT3G24005	pseudogene, chaperonin hsp60 (fragment), blastp match of 100% identity and 8.1e-06 P-value to GP [AT3G24005.1]		1.42332
A_84_P830397	AT3G24080	KRR1 family protein [AT3G24080.1]		1.00059
A_84_P20269	AT3G24430	HCF101 (HIGH-CHLOROPHYLL-FLUORESCENCE 101); ATP binding [AT3G24430.1]		-1.01691
A_84_P12676	AT3G24520	AT-HSFC1 (Arabidopsis thaliana heat shock transcription factor C1); DNA binding / transcription factor [AT3G24520.1]	-1.9079	-1.85069
A_84_P19314	AT3G24715	ATP binding / protein kinase/ protein-tyrosine kinase [AT3G24715.1]		-1.10351
A_84_P601724	AT3G25070	RIN4 (RPM1 INTERACTING PROTEIN 4); protein binding [AT3G25070.1]		1.17585
A_84_P507571	AT3G25130	similar to unnamed protein product [Vitis vinifera] (GB:CAO15235.1) [AT3G25130.1]		2.32046
A_84_P17413	AT3G25230	ROF1 (ROTAMASE FKBP 1); FK506 binding / calmodulin binding / peptidyl-prolyl cis-trans isomerase [AT3G25230.1]		1.268
A_84_P597276	AT3G25240	similar to unknown protein [Arabidopsis thaliana] (TAIR:AT3G07350.1); similar to unnamed protein product [Vitis vinifera] (GB:CAO39951.1); contains InterPro domain Protein of unknown function DUF506, plant (InterPro:IPR006502) [AT3G25240.1]		1.46431
A_84_P702276	AT3G25597	similar to unknown protein [Arabidopsis thaliana] (TAIR:AT1G26140.1) [AT3G25597.1]		1.237
A_84_P612395	AT3G25655	unknown protein [AT3G25655.1]	1.27521
A_84_P286390	AT3G25780	AOC3 (ALLENE OXIDE CYCLASE 3) [AT3G25780.1]		1.52547
A_84_P762464	AT3G25795	other RNA [AT3G25795.1]			1.15261
A_84_P565178	AT3G25882	NIMIN-2 (NIM1-INTERACTING 2) [AT3G25882.1]		1.61652
A_84_P72004	AT3G25890	AP2 domain-containing transcription factor, putative [AT3G25890.1]		1.33753
A_84_P291194	AT3G26070	plastid-lipid associated protein PAP / fibrillin family protein [AT3G26070.1]		-1.02858
A_84_P14560	AT3G26830	PAD3 (PHYTOALEXIN DEFICIENT 3); oxygen binding [AT3G26830.1]		1.17482
A_84_P276620	AT3G26960	similar to unknown protein [Arabidopsis thaliana] (TAIR:AT5G41050.1); similar to unnamed protein product [Vitis vinifera] (GB:CAO49052.1) [AT3G26960.1]		-1.2009
A_84_P24036	AT3G27070	TOM20-1 (TRANSLOCASE OUTER MEMBRANE 20-1) [AT3G27070.1]	-1.32657
A_84_P868030	AT3G27415	unknown protein [AT3G27415.1]		1.4792	1.38512
A_84_P24021	AT3G27690	LHCB2:4 (Photosystem II light harvesting complex gene 2.3); chlorophyll binding [AT3G27690.1]	-1.56053		-1.15521
A_84_P803335	AT3G28007	nodulin MtN3 family protein [AT3G28007.1]		-1.51334
A_84_P100746	AT3G28220	meprin and TRAF homology domain-containing protein / MATH domain-containing protein [AT3G28220.1]		-2.0144
A_84_P822379	AT3G28270	Identical to UPF0496 protein At3g28270 [Arabidopsis Thaliana] (GB:Q9LHD9;GB:Q8H7D0;GB:Q8H7E9;GB:Q944H3); similar to AT14A [Arabidopsis thaliana] (TAIR:AT3G28290.1); similar to AT14A [Arabidopsis thaliana] (TAIR:AT3G28300.1); similar to unnamed protein product [Vitis vinifera] (GB:CAO22906.1); contains InterPro domain Protein of unknown function DUF677 (InterPro:IPR007749) [AT3G28270.1]		-2.48708
A_84_P12725	AT3G28510	AAA-type ATPase family protein [AT3G28510.1]		2.31104
A_84_P594615	AT3G28550	proline-rich extensin-like family protein [AT3G28550.1]		4.35228
A_84_P203368	AT3G28840	similar to unknown protein [Arabidopsis thaliana] (TAIR:AT3G28780.1); contains InterPro domain Protein of unknown function DUF1216 (InterPro:IPR009605) [AT3G28840.1]		-1.50695
A_84_P12680	AT3G29030	ATEXPA5 (ARABIDOPSIS THALIANA EXPANSIN A5) [AT3G29030.1]			-1.31419
A_84_P536862	AT3G29034	unknown protein [AT3G29034.1]	1.12935	1.13383
A_84_P762490	AT3G29252	pseudogene of short-chain dehydrogenase/reductase (SDR) family [AT3G29252.1]	1.12176	1.68595
A_84_P842207	AT3G30120	pseudogene, similar to CTV.22, blastp match of 29% identity and 4.9e-74 P-value to GP [AT3G30120.1]		1.04567
A_84_P14597	AT3G30460	zinc finger (C3HC4-type RING finger) family protein [AT3G30460.1]		-2.81937
A_84_P803506	AT3G30775	ERD5 (EARLY RESPONSIVE TO DEHYDRATION 5); proline dehydrogenase [AT3G30775.1]	1.3356	2.85686
A_84_P53310	AT3G42180	catalytic/ transferase, transferring glycosyl groups [AT3G42180.1]		2.58178
A_84_P869953	AT3G44540	oxidoreductase, acting on the CH-CH group of donors [AT3G44540.2]			1.41771
A_84_P160413	AT3G44750	HD2A (HISTONE DEACETYLASE 2A); nucleic acid binding / zinc ion binding [AT3G44750.1]		1.08228
A_84_P17465	AT3G44760	similar to unknown protein [Arabidopsis thaliana] (TAIR:AT3G44770.1) [AT3G44760.1]		2.16799
A_84_P13764	AT3G44830	lecithin:cholesterol acyltransferase family protein / LACT family protein [AT3G44830.1]		2.16659
A_84_P17546	AT3G44860	FAMT (FARNESOIC ACID CARBOXYL-O-METHYLTRANSFERASE); S-adenosylmethionine-dependent methyltransferase/ farnesoic acid O-methyltransferase [AT3G44860.1]		1.2109
A_84_P18492	AT3G44870	S-adenosyl-L-methionine:carboxyl methyltransferase family protein [AT3G44870.1]		1.21036
A_84_P24087	AT3G45060	ATNRT2.6 (Arabidopsis thaliana high affinity nitrate transporter 2.6); nitrate transmembrane transporter [AT3G45060.1]	1.73267	1.38148	1.05483
A_84_P759080	AT3G45095	transposable element gene [AT3G45095.1]		1.29062
A_84_P14630	AT3G45330	lectin protein kinase family protein [AT3G45330.1]		2.13829
A_84_P17468	AT3G45650	NAXT1 (NITRATE EXCRETION TRANSPORTER1); nitrate efflux transmembrane transporter/ transporter [AT3G45650.1]	-1.54246	-1.67196
A_84_P19360	AT3G45660	proton-dependent oligopeptide transport (POT) family protein [AT3G45660.1]	-2.94195
A_84_P803603	AT3G45710	proton-dependent oligopeptide transport (POT) family protein [AT3G45710.1]	-1.59065	-1.63089
A_84_P837793	AT3G45920	receptor protein kinase-related [AT3G45920.1]		1.97029
A_84_P787902	AT3G46270	receptor protein kinase-related [AT3G46270.1]	2.6201	3.94616	3.54567
A_84_P23147	AT3G46280	protein kinase-related [AT3G46280.1]		3.48267	3.08951
A_84_P514686	AT3G46300	similar to unknown protein [Arabidopsis thaliana] (TAIR:AT3G46310.1); similar to hypothetical protein [Vitis vinifera] (GB:CAN66779.1) [AT3G46300.1]	1.29939	2.80034
A_84_P22203	AT3G46650	UDP-glucoronosyl/UDP-glucosyl transferase family protein [AT3G46650.1]	1.59366	2.26906	1.89219
A_84_P10856	AT3G46680	UDP-glucoronosyl/UDP-glucosyl transferase family protein [AT3G46680.1]		1.86023
A_84_P11802	AT3G46690	UDP-glucoronosyl/UDP-glucosyl transferase family protein [AT3G46690.1]		2.84318	2.14028
A_84_P12747	AT3G46700	UDP-glycosyltransferase/ transferase, transferring glycosyl groups [AT3G46700.1]		2.65717	2.17261
A_84_P14637	AT3G46720	UDP-glucoronosyl/UDP-glucosyl transferase family protein [AT3G46720.1]		2.62349
A_84_P526212	AT3G46880	similar to unknown protein [Arabidopsis thaliana] (TAIR:AT5G59080.1) [AT3G46880.1]	-1.90981	-2.7335	-2.64257
A_84_P15583	AT3G46970	ATPHS2/PHS2 (ALPHA-GLUCAN PHOSPHORYLASE 2); phosphorylase/ transferase, transferring glycosyl groups [AT3G46970.1]	-1.19508
A_84_P195914	AT3G47030	F-box family protein [AT3G47030.1]	-2.30578	-1.87885
A_84_P19367	AT3G47050	glycosyl hydrolase family 3 protein [AT3G47050.1]		1.96928
A_84_P154325	AT3G47070	similar to unknown [Populus trichocarpa] (GB:ABK95428.1) [AT3G47070.1]		-1.23232
A_84_P19368	AT3G47340	ASN1 (DARK INDUCIBLE 6) [AT3G47340.1]	1.62954	1.64739
A_84_P23152	AT3G47380	invertase/pectin methylesterase inhibitor family protein [AT3G47380.1]		2.20813
A_84_P12750	AT3G47430	PEX11B [AT3G47430.1]		-1.21944
A_84_P18423	AT3G47480	calcium-binding EF hand family protein [AT3G47480.1]		1.38859
A_84_P860746	AT3G47510	unknown protein [AT3G47510.1]		-1.30091
A_84_P69514	AT3G48200	similar to hypothetical protein OsI_020499 [Oryza sativa (indica cultivar-group)] (GB:EAY99266.1); similar to hypothetical protein OsJ_018975 [Oryza sativa (japonica cultivar-group)] (GB:EAZ35492.1); similar to unnamed protein product [Vitis vinifera] (GB:CAO64300.1) [AT3G48200.1]		-1.25022
A_84_P181494	AT3G48280	CYP71A25 (cytochrome P450, family 71, subfamily A, polypeptide 25); oxygen binding [AT3G48280.1]		-1.47572
A_84_P257990	AT3G48350	cysteine proteinase, putative [AT3G48350.1]		-1.29554
A_84_P139809	AT3G48420	haloacid dehalogenase-like hydrolase family protein [AT3G48420.1]		-1.83031
A_84_P286640	AT3G48510	similar to unknown protein [Arabidopsis thaliana] (TAIR:AT5G63350.1); similar to unnamed protein product [Vitis vinifera] (GB:CAO68256.1) [AT3G48510.1]		-2.12597
A_84_P147408	AT3G48570	protein transport protein SEC61 gamma subunit, putative [AT3G48570.1]		1.22126
A_84_P17481	AT3G48580	xyloglucan:xyloglucosyl transferase, putative / xyloglucan endotransglycosylase, putative / endo-xyloglucan transferase, putative [AT3G48580.1]		1.60261
A_84_P569671	AT3G48640	similar to unknown protein [Arabidopsis thaliana] (TAIR:AT5G66670.2); similar to unknown protein [Arabidopsis thaliana] (TAIR:AT5G66670.1) [AT3G48640.1]		2.30774
A_84_P22213	AT3G49160	pyruvate kinase family protein [AT3G49160.1]		1.21603
A_84_P12757	AT3G49220	pectinesterase family protein [AT3G49220.1]	-1.72632	-1.48015
A_84_P538662	AT3G49230	unknown protein [AT3G49230.1]	-1.48161
A_84_P288904	AT3G49570	similar to unknown protein [Arabidopsis thaliana] (TAIR:AT5G24660.1); similar to unknown protein [Brassica rapa subsp. pekinensis] (GB:AAQ92331.1) [AT3G49570.1]	1.59128
A_84_P787853	AT3G49580	similar to unknown protein [Arabidopsis thaliana] (TAIR:AT3G49570.1); similar to unknown protein [Brassica rapa subsp. pekinensis] (GB:AAQ92331.1) [AT3G49580.1]	1.89777		1.98958
A_84_P815691	AT3G49670	BAM2 (big apical meristem 2); ATP binding / protein serine/threonine kinase [AT3G49670.1]	-2.01819
A_84_P14649	AT3G49690	ATMYB84/MYB84/RAX3 (myb domain protein 84); DNA binding / transcription factor [AT3G49690.1]		-1.72782
A_84_P803776	AT3G49750	leucine-rich repeat family protein [AT3G49750.1]	-1.19335
A_84_P17486	AT3G49760	ATBZIP5 (ARABIDOPSIS THALIANA BASIC LEUCINE-ZIPPER 5); DNA binding / transcription factor [AT3G49760.1]	-2.73322	-2.1586
A_84_P549287	AT3G49820	similar to unknown protein [Arabidopsis thaliana] (TAIR:AT5G65925.1) [AT3G49820.1]	-1.28173
A_84_P14650	AT3G49960	peroxidase, putative [AT3G49960.1]		2.17931
A_84_P846796	AT3G50030	binding [AT3G50030.1]		2.27797
A_84_P20325	AT3G50060	MYB77; DNA binding / transcription factor [AT3G50060.1]		-1.25213
A_84_P22218	AT3G50240	KICP-02; microtubule motor [AT3G50240.1]	-1.42069
A_84_P10871	AT3G50280	transferase family protein [AT3G50280.1]		1.39717
A_84_P606215	AT3G50470	HR3 (HOMOLOG OF RPW8 3) [AT3G50470.1]		1.05432
A_84_P16544	AT3G50630	ICK2/KRP2 (KIP-RELATED PROTEIN 2); cyclin-dependent protein kinase inhibitor/ kinase inhibitor/ protein binding [AT3G50630.1]		-1.03178
A_84_P15599	AT3G50820	PSBO-2/PSBO2 (PHOTOSYSTEM II SUBUNIT O-2); oxygen evolving/ poly(U) binding [AT3G50820.1]		-1.1104
A_84_P819509	AT3G50830	COR413-PM2 (cold regulated 413 plasma membrane 2) [AT3G50830.1]		-1.1524
A_84_P243315	AT3G50900	similar to unknown protein [Arabidopsis thaliana] (TAIR:AT5G66490.1); similar to hypothetical protein [Thellungiella halophila] (GB:ABB45855.1) [AT3G50900.1]		1.0569
A_84_P12765	AT3G50980	XERO1 (DEHYDRIN XERO 1) [AT3G50980.1]	-1.6643	-1.65997
A_84_P514702	AT3G51290	proline-rich family protein [AT3G51290.1]	-1.91664
A_84_P603549	AT3G51325	zinc finger (C3HC4-type RING finger) family protein [AT3G51325.1]		1.06078
A_84_P583961	AT3G51340	pepsin A [AT3G51340.1]		3.33845	3.39157
A_84_P845665	AT3G51350	aspartyl protease family protein [AT3G51350.1]		1.54099	2.35818
A_84_P839837	AT3G51360	aspartyl protease family protein [AT3G51360.1]		4.21703	3.96248
A_84_P75354	AT3G51510	similar to unnamed protein product [Vitis vinifera] (GB:CAO14460.1) [AT3G51510.1]		-1.43934
A_84_P13713	AT3G51660	macrophage migration inhibitory factor family protein / MIF family protein [AT3G51660.1]		1.04637
A_84_P285270	AT3G51750	unknown protein [AT3G51750.1]		-1.21034
A_84_P758797	AT3G51760	unknown protein [AT3G51760.1]		-1.00572
A_84_P15656	AT3G51820	ATG4/CHLG/G4 (CHLOROPHYLL SYNTHASE); chlorophyll synthetase [AT3G51820.1]			-1.08296
A_84_P23171	AT3G51910	AT-HSFA7A (Arabidopsis thaliana heat shock transcription factor A7A); DNA binding / transcription factor [AT3G51910.1]		1.93936	1.48896
A_84_P10878	AT3G51930	transducin family protein / WD-40 repeat family protein [AT3G51930.1]		-1.63965
A_84_P819980	AT3G52180	ATPTPKIS1/DSP4/SEX4 (STARCH-EXCESS 4); protein tyrosine/serine/threonine phosphatase [AT3G52180.2]	-1.18931
A_84_P12770	AT3G52190	PHF1 (PHOSPHATE TRANSPORTER TRAFFIC FACILITATOR1); nucleotide binding [AT3G52190.1]		1.32655	1.35424
A_84_P785574	AT3G52340	SPP2; sucrose-phosphatase [AT3G52340.1]	-1.0646
A_84_P222439	AT3G52370	FLA15 (FASCICLIN-LIKE ARABINOGALACTAN PROTEIN 15 PRECURSOR) [AT3G52370.1]		-1.58908
A_84_P19389	AT3G52450	U-box domain-containing protein [AT3G52450.1]		2.219	2.08361
A_84_P21281	AT3G52470	harpin-induced family protein / HIN1 family protein / harpin-responsive family protein [AT3G52470.1]		1.366
A_84_P509388	AT3G52520	similar to unknown protein [Arabidopsis thaliana] (TAIR:AT5G06280.3); similar to unknown protein [Arabidopsis thaliana] (TAIR:AT5G06280.1) [AT3G52520.1]		1.00972
A_84_P228559	AT3G52540	ATOFP18/OFP18 (Arabidopsis thaliana ovate family protein 18) [AT3G52540.1]		1.19541
A_84_P761052	AT3G52720	carbonic anhydrase family protein [AT3G52720.2]		-2.39297
A_84_P19392	AT3G53040	late embryogenesis abundant protein, putative / LEA protein, putative [AT3G53040.1]	-2.16742	-2.15175
A_84_P13719	AT3G53150	UGT73D1 (UDP-GLUCOSYL TRANSFERASE 73D1); UDP-glycosyltransferase [AT3G53150.1]		2.38034
A_84_P10884	AT3G53260	PAL2 (phenylalanine ammonia-lyase 2); phenylalanine ammonia-lyase [AT3G53260.1]		1.27677
A_84_P24124	AT3G53420	PIP2A (PLASMA MEMBRANE INTRINSIC PROTEIN 2A); water channel [AT3G53420.1]		-1.15241
A_84_P14666	AT3G53480	ATPDR9/PDR9 (PLEIOTROPIC DRUG RESISTANCE 9); ATPase, coupled to transmembrane movement of substances [AT3G53480.1]		2.73653
A_84_P22233	AT3G53590	leucine-rich repeat transmembrane protein kinase, putative [AT3G53590.1]		1.50609
A_84_P16558	AT3G53720	ATCHX20 (CATION/H+ EXCHANGER 20); monovalent cation:proton antiporter [AT3G53720.1]			1.25452
A_84_P21289	AT3G53940	mitochondrial substrate carrier family protein [AT3G53940.1]		1.01573
A_84_P813598	AT3G54050	fructose-1,6-bisphosphatase, putative / D-fructose-1,6-bisphosphate 1-phosphohydrolase, putative / FBPase, putative [AT3G54050.1]		-1.55173
A_84_P21290	AT3G54120	reticulon family protein (RTNLB12) [AT3G54120.1]		1.16496
A_84_P24128	AT3G54150	embryo-abundant protein-related [AT3G54150.1]		1.31539
A_84_P152088	AT3G54390	transcription factor [AT3G54390.1]	-1.08262	-1.4295
A_84_P593776	AT3G54410	similar to unknown protein [Arabidopsis thaliana] (TAIR:AT1G70040.1); contains InterPro domain Protein of unknown function DUF1163 (InterPro:IPR009544) [AT3G54410.1]		1.92936
A_84_P13726	AT3G54420	ATEP3 (Arabidopsis thaliana chitinase class IV); chitinase [AT3G54420.1]		2.03751
A_84_P549304	AT3G54530	similar to unknown protein [Arabidopsis thaliana] (TAIR:AT3G54520.1) [AT3G54530.1]		2.40978
A_84_P188054	AT3G54640	TSA1 (TRYPTOPHAN SYNTHASE ALPHA CHAIN); tryptophan synthase [AT3G54640.1]	1.31754	1.6197
A_84_P522715	AT3G54830	amino acid transporter family protein [AT3G54830.1]	-1.42215	-1.58866
A_84_P19401	AT3G54880	similar to unknown protein [Arabidopsis thaliana] (TAIR:AT5G25360.1); similar to unnamed protein product [Vitis vinifera] (GB:CAO68874.1) [AT3G54880.1]		1.97434
A_84_P817510	AT3G54920	PMR6 (POWDERY MILDEW RESISTANT 6); lyase/ pectate lyase [AT3G54920.1]	-1.8151
A_84_P12784	AT3G55150	ATEXO70H1 (exocyst subunit EXO70 family protein H1); protein binding [AT3G55150.1]		4.21559	3.69109
A_84_P12785	AT3G55330	PPL1 (PSBP-LIKE PROTEIN 1); calcium ion binding [AT3G55330.1]		-1.13561
A_84_P13730	AT3G55340	RNA recognition motif (RRM)-containing protein [AT3G55340.1]		1.14224
A_84_P17513	AT3G55580	regulator of chromosome condensation (RCC1) family protein [AT3G55580.1]		-1.05797
A_84_P760385	AT3G55610	P5CS2 (DELTA 1-PYRROLINE-5-CARBOXYLATE SYNTHASE 2); catalytic/ glutamate 5-kinase/ glutamate-5-semialdehyde dehydrogenase/ oxidoreductase [AT3G55610.1]	-1.03104
A_84_P761076	AT3G55646	similar to unknown protein [Arabidopsis thaliana] (TAIR:AT2G39855.2) [AT3G55646.1]		-1.00567
A_84_P24135	AT3G55710	UDP-glucoronosyl/UDP-glucosyl transferase family protein [AT3G55710.1]	-1.5404
A_84_P242693	AT3G55790	unknown protein [AT3G55790.1]		4.05196	3.73891
A_84_P813537	AT3G55800	SBPASE (SEDOHEPTULOSE-BISPHOSPHATASE); phosphoric ester hydrolase/ sedoheptulose-bisphosphatase [AT3G55800.1]		-1.3565
A_84_P18460	AT3G55870	anthranilate synthase, alpha subunit, putative [AT3G55870.1]	1.26108	1.08916
A_84_P24136	AT3G55940	phosphoinositide-specific phospholipase C, putative [AT3G55940.1]		-1.40205
A_84_P12788	AT3G55970	oxidoreductase, 2OG-Fe(II) oxygenase family protein [AT3G55970.1]	1.05057
A_84_P849984	AT3G56080	dehydration-responsive protein-related [AT3G56080.1]		-1.13968
A_84_P21299	AT3G56090	ATFER3 (FERRITIN 3); ferric iron binding [AT3G56090.1]		1.56377
A_84_P856333	AT3G56200	amino acid transporter family protein [AT3G56200.1]	1.01699		1.36333
A_84_P789317	AT3G56275	pseudogene of unknown protein [AT3G56275.1]		-2.99506
A_84_P535125	AT3G56790	RNA splicing factor-related [AT3G56790.1]	-1.99066
A_84_P17519	AT3G57040	ARR9 (RESPONSE REACTOR 4); transcription regulator [AT3G57040.1]		-1.58099
A_84_P21304	AT3G57310	protease inhibitor/seed storage/lipid transfer protein (LTP) family protein [AT3G57310.1]			2.193
A_84_P16575	AT3G57490	40S ribosomal protein S2 (RPS2D) [AT3G57490.1]		1.03684
A_84_P18467	AT3G57520	ATSIP2 (ARABIDOPSIS THALIANA SEED IMBIBITION 2); hydrolase, hydrolyzing O-glycosyl compounds [AT3G57520.1]		1.55211
A_84_P20359	AT3G57540	remorin family protein [AT3G57540.1]		-1.11369
A_84_P19414	AT3G57680	peptidase S41 family protein [AT3G57680.1]		-1.04344
A_84_P17522	AT3G57700	protein kinase, putative [AT3G57700.1]		1.70702	1.4133
A_84_P23201	AT3G58720	zinc finger (C3HC4-type RING finger) family protein [AT3G58720.1]		-1.11035
A_84_P18472	AT3G58820	F-box family protein [AT3G58820.1]	-1.1159
A_84_P137439	AT3G58850	PAR2 (PHY RAPIDLY REGULATED 2); transcription regulator [AT3G58850.1]	-1.1125
[truncated: 945 more rows]
