# Supplementary material for: Escherichia coli O157:H7 F9 Fimbriae Recognize Plant Xyloglucan and Elicit a Response in Arabidopsis thaliana
Source: Int J Mol Sci. 2020 Dec 19;21(24):9720. doi: 10.3390/ijms21249720 (PMC7766294; doi:10.3390/ijms21249720)
Supplement: Supplementary file 1 [file ijms-21-09720-s001.zip › Table S2 Comparison dataset of A. thaliana genes responsive to E. coli DH5α from [34].xlsx]

## Sheet: Sheet2
		Fold-change (log2)
AGI	Function	E. coli DH5α	F9	H7	ECP
AT3G23250	DNA binding_ myb family transcription factor (MYB15)	3.38962
AT2G29870	water channel_ major intrinsic family protein / MIP family protein	3.06319
AT4G33070	pyruvate decarboxylase	3.05314
AT2G44370	unknown protein_ DC1 domain-containing protein	3.01712		3.00101	3.62761
AT1G77120	ADH1 (ALCOHOL DEHYDROGENASE 1); alcohol dehydrogenase_ alcohol dehydrogenase (ADH)	2.70872
AT5G48540	unknown protein_ 33 kDa secretory protein-related	2.6572
AT2G39200	MLO12; calmodulin binding_ seven transmembrane MLO family protein / MLO-like protein 12 (MLO12)	2.62369		1.78423	2.12807
AT5G10040	unknown protein	2.53677
AT2G43620	chitin binding / chitinase	2.36791			2.18847
AT1G55450	S-adenosylmethionine-dependent methyltransferase_ embryo-abundant protein-related	2.31024
AT2G35930	ubiquitin-protein ligase_ U-box domain-containing protein	2.30864		1.68052	1.58156
AT1G30700	electron carrier_ FAD-binding domain-containing protein	2.2717	2.74381	2.81862	3.06922
AT3G15520	peptidyl-prolyl cis-trans isomerase	2.16318
AT1G66090	ATP binding / nucleoside-triphosphatase/ nucleotide binding / transmembrane receptor_ disease resistance protein (TIR-NBS class), putative	2.15801
AT4E25020	EUGENE prediction	2.12507
AT2G24600	protein binding_ ankyrin repeat family protein	2.11341
AT4G20000	unknown protein_ VQ motif-containing protein	2.10961
AT2G38870	serine-type endopeptidase inhibitor	2.09828	1.93715	2.15455	2.22467
AT1G14540	peroxidase_ anionic peroxidase, putative	2.08908
AT2G34390	unknown protein_ major intrinsic family protein / MIP family protein	2.07112
AT4G14365	protein binding / ubiquitin-protein ligase/ zinc ion binding_ zinc finger (C3HC4-type RING finger) family protein / ankyrin repeat family protein	2.05279
AT3G55980	transcription factor_ zinc finger (CCCH-type) family protein	2.01151
AT4G01250	WRKY22; transcription factor	2.00745		1.86635
AT1G51700	ADOF1; DNA binding / transcription factor_ Dof-type zinc finger domain-containing protein (ADOF1)	2.00026
AT1G80840	WRKY40; transcription factor	1.99925
AT2G37430	nucleic acid binding / transcription factor/ zinc ion binding_ zinc finger (C2H2 type) family protein (ZAT11)	1.96364
AT4G33050	calmodulin binding	1.88748
AT1G72520	iron ion binding / lipoxygenase_ lipoxygenase, putative	1.87655
AT4G39940	AKN2; ATP binding / kinase/ transferase, transferring phosphorus-containing groups_ adenylylsulfate kinase 2 (AKN2)	1.86058
AT1G07135	unknown protein_ glycine-rich protein	1.84359
AT1G33055	unknown protein	1.83033
AT1G65390	ATPP2-A5; transmembrane receptor_ disease resistance protein (TIR class), putative	1.81132
AT2G17740	unknown protein_ DC1 domain-containing protein	1.80637		4.18406	3.63385
AT2G22500	binding / transporter_ mitochondrial substrate carrier family protein	1.78859
AT4G38550	unknown protein	1.76788
AT1G05300	ZIP5; cation transporter_ metal transporter, putative (ZIP5)	1.74919		1.33391
AT3G52450	ubiquitin-protein ligase_ U-box domain-containing protein	1.73684		2.27937	2.13079
AT1G19020	unknown protein	1.73081
AT2G38470	WRKY33; transcription factor unknown protein	1.72897
AT1G30755	unknown protein	1.70102
AT5G48430	unknown protein	1.688		7.4084	6.77806
AT3G02550	unknown protein_ LOB domain protein 41 / lateral organ boundaries domain protein 41 (LBD41)	1.67675
AT1G78850	sugar binding_ curculin-like (mannose-binding) lectin family protein	1.6715
AT3G07390	AIR12; extracellular matrix structural constituent_ auxin-responsive protein / auxin-induced protein (AIR12)	1.65781		2.03228	1.92728
AT4G26200	ACS7; 1-aminocyclopropane-1-carboxylate synthase_ 1-aminocyclopropane-1-carboxylate synthase, putative / ACC synthase, putative	1.64642
AT3G22060	unknown protein_ receptor protein kinase-related	1.63139	1.5707	1.71737	1.97943
AT3G10300	calcium ion binding	1.61972
AT2G18680	unknown protein	1.59842
AT2G26560	nutrient reservoir_ patatin, putative	1.59348		1.03196
AT5G39580	peroxidase	1.59141	1.70997	1.70354	2.71254
AT5G20230	ATBCB (ARABIDOPSIS BLUE-COPPER-BINDING PROTEIN); copper ion binding / electron transporter_ plastocyanin-like domain-containing protein	1.59094
AT5G57220	CYP81F2; heme binding / iron ion binding / monooxygenase/ oxygen binding	1.58249		2.29607
AT1G51800	kinase_ leucine-rich repeat protein kinase, putative	1.57579		2.96678	2.56646
AT2G36690	oxidoreductase, acting on paired donors, with incorporation or reduction of molecular oxygen, 2-oxoglutarate as one donor, and incorporation of one atom each of oxygen into both donors_ oxidoreductase, 2OG-Fe(II) oxygenase family protein	1.56641		4.18563	5.88194
AT4G39670	unknown protein	1.56338
AT2G44490	hydrolase, hydrolyzing O-glycosyl compounds_ glycosyl hydrolase family 1 protein	1.55531
AT5G44070	CAD1 (CADMIUM SENSITIVE 1)_ phytochelatin synthase 1 (PCS1)	1.54688
AT1G76600	unknown protein	1.52573
AT3G09520	protein binding_ exocyst subunit EXO70 family protein	1.52561		1.02407
AT2G37940	unknown protein	1.51825
AT1G52200	unknown protein	1.5104		1.28649
AT5G06310	unknown protein NHL3	1.5019
AT5G12930	unknown protein	1.49401
AT4G35180	amino acid permease	1.48758		3.20873
AT5G41080	glycerophosphodiester phosphodiesterase	1.48345	2.97329	4.07172
AT1G30730	electron carrier_ FAD-binding domain-containing protein	1.48192	1.69056	1.46481	2.51895
AT4G23800	transcription factor WRKY53; transcription factor	1.4791
AT3G57450	unknown protein	1.46934
AT4G35110	unknown protein	1.46548
AT1G51620	ATP binding / kinase/ protein kinase/ protein serine/threonine kinase/ protein-tyrosine kinase	1.46067		1.47116	1.36207
AT1G66880	ATP binding / protein kinase/ protein serine/threonine kinase/ protein-tyrosine kinase_ serine/threonine protein kinase family protein	1.44892
AT3G48650	unknown protein_ pseudogene, At14a-related protein	1.44839
AT2G13790	ATSERK4; protein binding / protein kinase/ transmembrane receptor protein serine/threonine kinase_ leucine-rich repeat family protein / protein kinase family protein	1.43715
AT5G25250	unknown protein	1.43423
AT5G02490	ATP binding_ heat shock cognate 70 kDa protein 2 (HSC70-2) (HSP70-2)	1.42969
AT5G25450	ubiquinol-cytochrome-c reductase_ ubiquinol-cytochrome C reductase complex 14 kDa protein, putative	1.42053		1.4747
AT1G49000	unknown protein	1.41788			1.47433
AT3G16150	asparaginase_ L-asparaginase, putative / L-asparagine amidohydrolase, putative	1.41682		1.15398
AT5G47720	acetyl-CoA C-acetyltransferase binding / transporter	1.40149
AT5G26340	MSS1; carbohydrate transporter/ sugar porter_ hexose transporter, putative	1.4009		1.04628
AT1G18300	hydrolase_ MutT/nudix family protein	1.39807			1.17615
AT3G13950	unknown protein	1.39373
AT2G37710	kinase_ lectin protein kinase, putative	1.38552
AT1G59870	ATPase, coupled to transmembrane movement of substances_ ABC transporter family protein	1.3832
AT4G32870	unknown protein	1.37948
AT2G41380	unknown protein_ embryo-abundant protein-related	1.37751
AT2G44380	unknown protein_ DC1 domain-containing protein	1.36085		3.43607	3.36022
AT5G01540	kinase_ lectin protein kinase, putative	1.35649
AT5G67450	AZF1 (ARABIDOPSIS ZINC-FINGER PROTEIN 1); nucleic acid binding / transcription factor/ zinc ion binding_ zinc finger (C2H2 type) protein 1 (AZF1)	1.35549			1.31213
AT4G24110	unknown protein	1.35534	1.20208	1.2741
AT2G13800	ATSERK5; ATP binding / protein kinase/ transmembrane receptor protein serine/threonine kinase_ leucine-rich repeat family protein / protein kinase family protein	1.34409
AT2G06960	oxidoreductase, acting on paired donors, with incorporation or reduction of molecular oxygen, 2-oxoglutarate as one donor, and incorporation of one atom each of oxygen into both donors_ oxidoreductase, 2OG-Fe(II) oxygenase family protein	1.3408
AT3G18830	ATPLT5; D-ribose transporter/ D-xylose transporter/ carbohydrate transporter/ galactose transporter/ glucose transporter/ glycerol transporter/ hydrogen:sugar symporter/ mannitol transporter/ monosaccharide transporter/ myo-inositol transporter/ sugar porter_ mannitol transporter, putative	1.3311		1.1897
AT1G07000	protein binding_ exocyst subunit EXO70 family protein	1.3305
AT2G29720	monooxygenase/ oxidoreductase_ monooxygenase family protein	1.32778
AT4G08350	structural constituent of ribosome / transcription factor/ transcriptional elongation regulator_ KOW domain-containing transcription factor family protein	1.3223
AT1G02360	chitinase	1.3176		3.17056
AT4G30210	ATR2_ NADPH-cytochrome p450 reductase, putative / NADPH-ferrihemoprotein reductase, putative	1.31312
AT1G25400	unknown protein	1.31072
AT4G39640	gamma-glutamyltransferase_ gamma-glutamyltranspeptidase family protein	1.30883
AT4G14365	protein binding / ubiquitin-protein ligase/ zinc ion binding_ zinc finger (C3HC4-type RING finger) family protein / ankyrin repeat family protein	1.30687
AT1G62420	unknown protein	1.30626		1.62934
AT4G20830	electron carrier_ FAD-binding domain-containing protein	1.30264
AT2G36690	oxidoreductase, acting on paired donors, with incorporation or reduction of molecular oxygen, 2-oxoglutarate as one donor, and incorporation of one atom each of oxygen into both donors_ oxidoreductase, 2OG-Fe(II) oxygenase family protein	1.29813		4.18563	5.88194
AT3G59080	DNA binding / pepsin A_ aspartyl protease family protein	1.29743
AT2G25735	unknown protein	1.29431	1.12272	1.30379
AT3G51920	CAM9 (CALMODULIN 9); calcium ion binding_ calmodulin-9 (CAM9)	1.28767
AT2G01180	ATPAP1 (PHOSPHATIDIC ACID PHOSPHATASE 1); phosphatidate phosphatase_ phosphatidic acid phosphatase family protein / PAP2 family protein	1.28638
AT3G28210	PMZ_ zinc finger (AN1-like) family protein	1.28412
AT3G28930	AIG2 (AVRRPT2-INDUCED GENE 2)_ avrRpt2-induced AIG2 protein (AIG2)	1.27676
AT3G15356	carbohydrate binding_ legume lectin family protein	1.26592
AT1G05670	transferase, transferring glycosyl groups_ UDP-glucoronosyl/UDP-glucosyl transferase family protein	1.26066
AT4G20860	electron carrier/ oxidoreductase_ FAD-binding domain-containing protein	1.25653	1.96744	1.97458	2.00667
AT4G22470	lipid binding_ protease inhibitor/seed storage/lipid transfer protein (LTP) family protein	1.25548		1.13134	1.31999
AT2G26530	AR781	1.25501
AT1G28380	unknown protein	1.25494
AT4G32480	unknown protein	1.25077		2.89281
AT2G30490	ATC4H (CINNAMATE-4-HYDROXYLASE)_ trans-cinnamate 4-monooxygenase / cinnamic acid 4-hydroxylase (C4H) (CA4H) / cytochrome P450 73 (CYP73) (CYP73A5)	1.23792		1.10192	1.10919
AT2G36220	unknown protein	1.23125
AT2G32235	unknown protein unknown protein	1.23001
AT1G07400	unknown protein_ 17.8 kDa class I heat shock protein (HSP17.8-CI)	1.22787		1.47803
AT3G46280	unknown protein_ protein kinase-related	1.22711		3.48267	3.08951
AT3G11820	SYP121; t-SNARE_ syntaxin 121 (SYP121) / syntaxin-related protein (SYR1)	1.22664
AT2G19190	kinase_ light-responsive receptor protein kinase / senescence-responsive receptor-like serine/threonine kinase, putative (SIRK)	1.21624		2.19764	2.67152
AT1G30720	electron carrier_ FAD-binding domain-containing protein	1.20937		2.34076	2.95216
AT1G17420	LOX3; iron ion binding / lipoxygenase_ lipoxygenase, putative	1.20844	1.02576
AT2G31880	ATP binding / kinase/ protein serine/threonine kinase unknown protein	1.20556
AT2G40140	transcription factor_ zinc finger (CCCH-type) family protein	1.2033
AT5G45750	GTP binding_ Ras-related GTP-binding protein, putative	1.20169
AT4G11890	ATP binding / kinase/ protein kinase/ protein serine/threonine kinase/ protein-tyrosine kinase	1.20023
AT5G48657	unknown protein_ defense protein-related	1.19383
AT1G28370	ATERF11/ERF11; DNA binding / transcription factor/ transcriptional repressor_ ERF domain protein 11 (ERF11)	1.19105
AT4G25110	caspase_ latex-abundant family protein (AMC2) / caspase family protein	1.18978		1.37081
AT1G15030	unknown protein unknown protein	1.18658
AT3G47380	enzyme inhibitor/ pectinesterase/ pectinesterase inhibitor_ invertase/pectin methylesterase inhibitor family protein	1.17901		2.20813
AT2G29870	water channel_ major intrinsic family protein / MIP family protein	1.17628
AT2G38900	serine-type endopeptidase inhibitor	1.17388
AT3G21630	kinase	1.1704
AT2G47550	pectinesterase	1.16966	1.96876	1.42523	1.76749
AT1G65490	unknown protein	1.15755
AT2G02000	calmodulin binding_ glutamate decarboxylase, putative	1.15525
AT4G23010	unknown protein_ UDP-galactose transporter-related	1.1551		1.19708
AT5E39460	EUGENE prediction	1.15452
AT5G54490	PBP1 (PINOID-BINDING PROTEIN 1); calcium ion binding_ calcium-binding EF-hand protein, putative	1.15035
AT1G42990	ATBZIP60; DNA binding / transcription factor_ bZIP transcription factor family protein	1.14328
AT5G52640	HSP81-1 (HEAT SHOCK PROTEIN 81-1); ATP binding / unfolded protein binding_ heat shock protein 81-1 (HSP81-1) / heat shock protein 83 (HSP83)	1.14279	1.46403	1.52136
AT4G22530	S-adenosylmethionine-dependent methyltransferase_ embryo-abundant protein-related	1.13851
AT4G25900	aldose 1-epimerase	1.13833
AT3G19010	flavonol synthase/ iron ion binding / isopenicillin-N synthase_ oxidoreductase, 2OG-Fe(II) oxygenase family protein	1.13535
AT3G20340	unknown protein	1.13514
AT5G15120	unknown protein	1.13348
AT5G22520	unknown protein	1.1313
AT3G27220	unknown protein_ kelch repeat-containing protein	1.12803
AT5G11670	malic enzyme/ oxidoreductase, acting on NADH or NADPH, NAD or NADP as acceptor_ malate oxidoreductase, putative	1.12536
AT2G37040	PAL1; phenylalanine ammonia-lyase_ phenylalanine ammonia-lyase 1 (PAL1)	1.12209	1.2859	1.42773	1.19262
AT4G13510	AMT1 (AMMONIUM TRANSPORT 1); ammonium transporter_ ammonium transporter 1, member 1 (AMT1.1)	1.12141
AT3G10930	unknown protein	1.1201
AT4G36500	unknown protein	1.11963
AT1G10340	protein binding_ ankyrin repeat family protein	1.11847
AT3G59700	ATHLECRK (ARABIDOPSIS THALIANA LECTIN-RECEPTOR KINASE); kinase_ lectin protein kinase, putative	1.11222
AT1G69930	ATGSTU11; glutathione transferase	1.109
AT3G10040	transcription factor	1.10297
AT3G21080	unknown protein_ ABC transporter-related	1.09446
AT1G78830	sugar binding_ curculin-like (mannose-binding) lectin family protein	1.09264
AT1G33610	protein binding_ leucine-rich repeat family protein	1.08966		1.39228
AT5G37600	ATGSR1; glutamate-ammonia ligase_ glutamine synthetase, putative	1.08577			1.12885
AT3G57550	AGK2_ guanylate kinase 2 (GK-2)	1.08444
AT1G30620	MUR4 (MURUS 4); catalytic_ UDP-D-xylose 4-epimerase, putative (MUR4)	1.08315
AT2G37800	protein binding / zinc ion binding_ DC1 domain-containing protein	1.08163
AT1G32928	unknown protein	1.07954		1.03079
AT2G37710	kinase_ lectin protein kinase, putative	1.07843
AT1G61360	ATP binding / carbohydrate binding / kinase/ protein kinase/ protein serine/threonine kinase/ protein-tyrosine kinase/ sugar binding_ S-locus lectin protein kinase family protein	1.07567		1.10312
AT3G50960	electron transporter	1.07279
AT1G22280	catalytic/ protein phosphatase type 2C	1.06905
AT1G19530	unknown protein	1.06652
AT1G21010	unknown protein	1.05962
AT1G70530	kinase	1.05765
AT1G30755	unknown protein	1.05722
AT1G32920	unknown protein	1.05514
AT2G35980	YLS9 (YELLOW-LEAF-SPECIFIC GENE 9)_ harpin-induced family protein (YLS9) / HIN1 family protein / harpin-responsive family protein	1.05105		1.09154
AT2G41430	ERD15 (EARLY RESPONSIVE TO DEHYDRATION 15)_ dehydration-induced protein (ERD15)	1.04904
AT2G02220	ATP binding / protein kinase/ protein serine/threonine kinase/ protein-tyrosine kinase_ leucine-rich repeat transmembrane protein kinase, putative	1.04849
AT3G54150	S-adenosylmethionine-dependent methyltransferase_ embryo-abundant protein-related	1.04205		1.31539
AT1G29690	CAD1	1.03736
AT1G68840	RAV2; DNA binding / transcription factor_ DNA-binding protein RAV2 (RAV2) / AP2 domain-containing protein RAP2.8	1.03735
AT5G37770	TCH2 (TOUCH 2); calcium ion binding_ touch-responsive protein / calmodulin-related protein 2, touch-induced (TCH2)	1.03623
AT4G27710	CYP709B3; heme binding / iron ion binding / monooxygenase/ oxygen binding	1.03571
AT5G42830	transferase_ transferase family protein	1.03405		1.518
AT1G50740	unknown protein	1.02983
AT3G26500	protein binding_ leucine-rich repeat family protein	1.02795
AT5G22690	ATP binding / transmembrane receptor_ disease resistance protein (TIR-NBS-LRR class), putative	1.02183
AT5G13080	WRKY75; transcription factor	1.01571	1.17489	1.55807
AT5G54810	TSB1 (TRYPTOPHAN SYNTHASE BETA-SUBUNIT)_ tryptophan synthase, beta subunit 1 (TSB1)	1.0152
AT1G25390	kinase	1.01277			1.26399
AT2G45220	enzyme inhibitor/ pectinesterase	1.01255	2.56758	2.62824	2.56614
AT2G41110	ATCAL4; calcium ion binding unknown protein	1.012
AT1G08050	protein binding / ubiquitin-protein ligase/ zinc ion binding_ zinc finger (C3HC4-type RING finger) family protein	1.01085
AT5G61210	SNAP33; t-SNARE_ SNAP25 homologous protein SNAP33 (SNAP33) (SNAP33B) / synaptosomal-associated protein SNAP25-like 1 / snap25a	1.00888
AT1G13210	ATPase, coupled to transmembrane movement of ions, phosphorylative mechanism / calmodulin binding_ haloacid dehalogenase-like hydrolase family protein	1.00847
AT1G59590	ZCF37	1.00702
AT1G03370	unknown protein_ C2 domain-containing protein / GRAM domain-containing protein	1.00484
AT1G56140	ATP binding / protein binding / protein kinase/ protein serine/threonine kinase/ protein-tyrosine kinase_ leucine-rich repeat family protein / protein kinase family protein	1.00278
AT5G13490	AAC2; ATP:ADP antiporter/ binding_ ADP, ATP carrier protein 2, mitochondrial / ADP/ATP translocase 2 / adenine nucleotide translocator 2 (ANT2)	1.00176		1.46866
AT5G11970	unknown protein	1.00082
AT1G72060	serine-type endopeptidase inhibitor heat shock protein binding / unfolded protein binding	0.998293
AT3G18250	unknown protein	0.995478		2.69016
AT1G67470	ATP binding / kinase/ protein kinase/ protein serine/threonine kinase	0.994579
AT3G56880	unknown protein_ VQ motif-containing protein	0.993456
AT4G30530	catalytic_ defense-related protein, putative	0.99208
AT3G21060	nucleotide binding NADK1; NAD+ kinase	0.9896
AT4G02330	pectinesterase	0.987471
AT1G08940	catalytic_ phosphoglycerate/bisphosphoglycerate mutase family protein	0.985091
AT2G40000	unknown protein	0.984279
AT4G21920	unknown protein	0.984027		1.21817
AT5G26920	calmodulin binding	0.980095
AT5G49520	WRKY48; transcription factor	0.978949
AT1G28390	ATP binding / kinase/ protein kinase/ protein serine/threonine kinase/ protein-tyrosine kinase	0.978383	1.50617	1.71897
AT1G08630	aldehyde-lyase_ L-allo-threonine aldolase-related	0.978072		1.65719
AT5G48380	ATP binding / protein binding / protein kinase/ protein serine/threonine kinase/ protein-tyrosine kinase_ leucine-rich repeat family protein / protein kinase family protein	0.97539
AT5G27760	unknown protein_ hypoxia-responsive family protein	0.974703
AT3G06435	unknown protein	0.9742
AT1G65230	unknown protein pepsin A	0.97406		-1.94455
AT4G23800	transcription factor WRKY53; transcription factor	0.973201
AT1G13330	unknown protein unknown protein	0.968518
AT1G18380	unknown protein	0.968471		1.0905
AT4G26930	MYB97; DNA binding / transcription factor	0.968158
AT1G34750	catalytic/ protein phosphatase type 2C	0.965563
AT4G23190	CRK11 (CYSTEINE-RICH RLK11); kinase_ protein kinase family protein	0.960345
AT1G76070	unknown protein	0.959578		1.00912
AT2G47140	oxidoreductase_ short-chain dehydrogenase/reductase (SDR) family protein	0.954614		1.59031	1.42008
AT1G10140	unknown protein	0.946958	1.02278	1.44036
AT4G28350	ATP binding / carbohydrate binding / kinase/ protein kinase/ protein serine/threonine kinase/ protein-tyrosine kinase_ lectin protein kinase family protein	0.946939
AT1G30370	triacylglycerol lipase_ lipase class 3 family protein	0.944818
AT2G28250	kinase	0.94376
AT1G79245	unknown protein	0.937928
AT5G45000	transmembrane receptor_ Toll-Interleukin-Resistance (TIR) domain-containing protein	0.936504		1.35194	1.1913
AT4G20780	calcium ion binding	0.934908		1.21685
AT3G49530	ANAC062; transcription factor_ no apical meristem (NAM) family protein	0.928993
AT1G65690	unknown protein_ harpin-induced protein-related / HIN1-related / harpin-responsive protein-related	0.924384	1.52213	2.03058	1.87401
AT5G50200	WR3	0.923177	1.01899	1.34475	1.30967
AT5G18400	unknown protein	0.917379
AT2G34500	CYP710A1; heme binding / iron ion binding / monooxygenase/ oxygen binding	0.917117
AT3G19260	LAG1 HOMOLOG 2 (LONGEVITY ASSURANCE GENE1 HOMOLOG 2)_ longevity-assurance (LAG1) family protein	0.913623
AT4G12120	SEC1B; protein transporter_ cytokinesis-related Sec1 protein, putative	0.910761
AT1G74360	ATP binding / protein kinase/ protein serine/threonine kinase/ protein-tyrosine kinase_ leucine-rich repeat transmembrane protein kinase, putative	0.90899
AT3G50950	ATP binding electron transporter	0.908157
AT1G03610	unknown protein	0.907953
AT3G30775	ERD5 (PROLINE OXIDASE); proline dehydrogenase_ proline oxidase, mitochondrial / osmotic stress-responsive proline dehydrogenase (POX) (PRO1) (ERD5)	0.907825	1.46733	2.64936
AT4G27110	unknown protein_ phytochelatin synthetase-related	0.902827
AT3G07090	unknown protein	0.897561
AT1G66460	ATP binding / kinase/ protein kinase/ protein serine/threonine kinase/ protein-tyrosine kinase	0.896819		1.19875
AT1G69890	unknown protein	0.890384
AT1G58340	ZF14; antiporter/ drug transporter/ transporter_ MATE efflux protein-related	0.890281
AT4G23180	CRK10 (CYSTEINE-RICH RLK10); ATP binding / kinase/ protein kinase/ protein serine/threonine kinase/ protein-tyrosine kinase_ receptor-like protein kinase 4, putative (RLK4)	0.890229
AT4G15530	ATP binding / kinase/ transferase, transferring phosphorus-containing groups_ pyruvate phosphate dikinase family protein	0.887098		1.05504
AT3G55450	ATP binding / kinase/ protein kinase/ protein serine/threonine kinase/ protein-tyrosine kinase	0.886771
AT1G66180	pepsin A_ aspartyl protease family protein	0.884216
AT2G41090	calcium ion binding_ calmodulin-like calcium-binding protein, 22 kDa (CaBP-22)	0.882224
AT3E21190	EUGENE prediction	0.881481
AT5G24110	WRKY30; transcription factor	0.881371
AT2G26150	ATHSFA2; DNA binding / transcription factor_ heat shock transcription factor family protein	0.8744
AT5G19110	ATP binding_ extracellular dermal glycoprotein-related / EDGP-related	0.873449
AT1G09070	rhodopsin-like receptor_ C2 domain-containing protein / src2-like protein, putative	0.866522
AT3G54810	transcription factor_ zinc finger (GATA type) family protein	0.865642
AT2G31020	oxysterol binding_ oxysterol-binding family protein	0.863878		1.24179
AT5G55970	protein binding / ubiquitin-protein ligase/ zinc ion binding_ zinc finger (C3HC4-type RING finger) family protein	0.863559
AT2G39530	unknown protein_ integral membrane protein, putative	0.862924	2.23781	2.11076	2.64794
AT1G09940	HEMA2; glutamyl-tRNA reductase_ glutamyl-tRNA reductase 2 / GluTR (HEMA2)	0.861212
AT3G07040	RPM1 (RESISTANCE TO P. SYRINGAE PV MACULICOLA 1)_ disease resistance protein RPM1 (CC-NBS-LRR class), putative	0.861183
AT4G04700	CPK27; ATP binding / calcium ion binding / kinase/ protein kinase/ protein serine/threonine kinase/ protein-tyrosine kinase_calcium-dependent protein kinase, putative / CDPK, putative	0.859329
AT1G66480	unknown protein	0.857926
AT5G62570	calmodulin binding	0.857741
AT2G37970	binding_ SOUL heme-binding family protein	0.854611
AT1G80460	NHO1; carbohydrate kinase_ glycerol kinase, putative	0.854608	1.31081	1.30851	1.3424
AT5G02780	unknown protein_ In2-1 protein, putative	0.851983	1.60673	1.74826
AT4G39675	unknown protein	0.850693
AT2G25625	unknown protein	-0.849457
AT4G25630	FIB2 (FIBRILLARIN 2)_ fibrillarin 2 (FIB2)	-0.878524		1.1956
AT3G12630	DNA binding / zinc ion binding_ zinc finger (AN1-like) family protein	-0.89161
AT5G67480	protein binding_ TAZ zinc finger family protein / BTB/POZ domain-containing protein	-0.893334
AT5G13400	transporter_ proton-dependent oligopeptide transport (POT) family protein	-0.912214
AT2G46600	calcium ion binding	-0.918087
AT2G43820	UDP-glycosyltransferase/ transferase, transferring glycosyl groups / transferase, transferring hexosyl groups	-0.978891
AT1G72610	GLP1 (GERMIN-LIKE PROTEIN 1); nutrient reservoir	-0.987642		-1.20707
AT1G26770	ATEXPA10 (ARABIDOPSIS THALIANA EXPANSIN A10)	-1.0067
AT5G65010	ASN2 (ASPARAGINE SYNTHETASE 2); asparagine synthase (glutamine-hydrolyzing)_ asparagine synthetase 2 (ASN2)	-1.32351
AT4G34950	unknown protein_ nodulin family protein	-1.3698
AT2G38170	CAX1; calcium:hydrogen antiporter_ calcium exchanger (CAX1)	-1.6286		-1.50962
AT3G28730	ATHMG (HIGH MOBILITY GROUP); transcription factor heme binding / iron ion binding / monooxygenase/ oxygen binding	-1.6605
