# Supplementary material for: Escherichia coli O157:H7 F9 Fimbriae Recognize Plant Xyloglucan and Elicit a Response in Arabidopsis thaliana
Source: Int J Mol Sci. 2020 Dec 19;21(24):9720. doi: 10.3390/ijms21249720 (PMC7766294; doi:10.3390/ijms21249720)
Supplement: Supplementary file 1 [file ijms-21-09720-s001.zip › Table S3 Comparison dataset of A. thaliana genes responsive to PAMPs from [35].xlsx]

## Sheet: Sheet2
		Average Fold Change
AGI	Description	hrpA	COR- hrpS	E. coli	DC3000	F9	H7	ECP
AT5G64890	expressed protein	21.1121	8.37835	31.2691	35.0984		4.10242	3.32752
AT5G48430	dermal glycoprotein precursor, extracellular-like	28.5088	4.92458	16.7567	2.3511		7.4084	6.77806
AT4G08770	peroxidase, putative	54.4427	9.40438	14.5876	24.8183		2.34652
AT2G44370	CHP-rich zinc finger protein, putative	21.6056	7.63873	11.5782	-1.51572		3.00101	3.62761
AT4G36430	peroxidase, putative	11.0553	3.40267	11.5782	8.9797
AT2G36690	2-oxoglutarate-dependent dioxygenase family protein	14.2544	3.32495	11.3137	1.66248		4.18563	5.88194
AT3G55150	exocyst subunit EXO70 family protein	14.2544	5.52765	9.18959	-1.02337		4.21559	3.69109
AT5G39580	ATP24a peroxidase	11.8488	9.18959	8.7746	4.3873	1.70997	1.70354	2.71254
AT2G39380	hypothetical protein	15.6346	2.9622	8.7746	1.38191		3.93532	4.33411
AT4G26200	AtACS7 ACC synthase	8.9797	3.56359	8.37835	3.03143
AT5G64100	peroxidase, putative	10.8028	4	8.18699	6.6499
AT2G39530	integral membrane protein, putative, contains 3 transmembrane domains	10.0794	7.12719	8	3.4822	2.23781	2.11076	2.64794
AT1G30700	FAD-linked oxidoreductase family protein	12.6992	4.3873	8	2.57874	2.74381	2.81862	3.06922
AT2G38940	AtPT2 phosphate transporter	9.6242	3.56359	8	1.66248	3.10147		3.28448
AT1G13540	hypothetical protein	5.03968	4.48985	7.29378	-1.6245		2.56111
AT1G05700	leucine-rich repeat protein kinase, putative similar to light repressible receptor protein kinase	6.3496	7.29378	7.12719	1.31951
AT4G15400	acyltransferase family; similar to deacetylvindoline 4-O-acetyltransferase	9.84916	9.40438	6.9644	1.4811		3.19071	3.25043
AT3G46690	glucuronosyl transferase-like protein	11.8488	5.92439	6.6499	3.64689		2.84318	2.14028
AT4G24110	expressed protein	9.40438	6.20458	6.6499	38.4968	1.20208	1.2741
AT1G30720	FAD-linked oxidoreductase family protein	6.6499	3.40267	6.49802	1.07177		2.34076	2.95216
AT1G14540	anionic peroxidase similar to lignin forming peroxidase	6.3496	5.65685	6.3496	3.32495
AT3G46280	protein kinase-related, contains similarity to light repressible receptor protein kinase	8.18699	4.92458	6.06287	3.1748		3.48267	3.08951
AT1G12940	nitrate transporter, putative	4.92458	8	6.06287	1
AT4G40020	putative protein	5.03968	2.82843	5.92439	1.4811		1.82923
AT2G17740	CHP-rich zinc finger protein, putative	9.40438	4.8121	5.78908	-1.38191		4.18406	3.63385
AT4G23700	AtCHX17 member of Putative Na+/H+ antiporter family	10.5561	4.18918	5.78908	8.18699		3.10476
AT5G15130	AtWRKY72 transcription factor	4.28709	4.92458	5.78908	2.51984		4.17963
AT1G51915	cryptdin protein-related	8	1.82344	5.65685	1.55114		2.42938
AT5G12930	expressed protein	8.57419	4.92458	5.65685	8.7746
AT1G51820	leucine-rich repeat protein kinase, putative, similar to light repressible receptor protein kinase	9.40438	3.24901	5.52765	-1.07177		1.84564	2.28478
AT2G19190	AtFRK1 Flagellin-induced receptor-like kinase	9.40438	4.18918	5.52765	-1.09682		2.19764	2.67152
AT5G44380	FAD-linked oxidoreductase family protein	8.57419	3.73213	5.52765	2	2.34916	2.46977	2.50973
AT5G55090	protein kinase family protein	7.81728	3.03143	5.52765	14.5876	2.38194	3.81622	3.05678
AT2G39200	AtMLO12 seven transmembrane MLO family protein	7.12719	5.03968	5.4014	-1.20303		1.78423	2.12807
AT4G01250	AtWRKY22 transcription factor	5.92439	2.51984	5.4014	-1.07177		1.86635
AT2G44790	AtUCC2 uclacyanin II.	10.315	1.90968	5.15748	5.27803		3.16353
AT1G49030	unknown protein	5.4014	6.49802	5.15748	2.04675
AT5G44910	disease resistance protein (TIR class), putative	5.78908	2.89454	5.03968	-1.17555		2.88671	3.16326
AT1G65730	oligopeptide transporter OPT family protein	3.56359	2.63902	5.03968	2.14355	1.96641	1.8279
AT1G51850	light repressible receptor protein kinase, putative; similar to light repressible receptor protein kinase	7.12719	4.3873	4.92458	-2.63902		2.87822	3.69493
AT1G02430	ADP-ribosylation factor, putative	4.8121	4.70219	4.8121	-1.04729		3.28783
AT2G35980	AtYLS9 Encodes a gene expressed in senescing leaves that is homologous to the pathogen-induced gene hin1.	5.4014	7.46426	4.8121	3.4822		1.09154
AT2G42060	CHP-rich zinc finger protein, putative	6.80534	7.46426	4.8121	2.57874		5.06483	4.78276
AT2G45220	pectinesterase family protein	6.20458	3.40267	4.70219	4.92458	2.56758	2.62824	2.56614
AT5G64905	Expressed protein	5.52765	2.46229	4.70219	1.23114		2.34637	2.19594
AT1G51860	receptor-like protein kinase, putative	4.28709	3.4822	4.70219	-1.04729		1.78913	1.53921
AT5G52830	AtWRKY27 transcription factor	4.48985	2.46229	4.59479	1.09682
AT4G12500	protease inhibitor/seed storage/lipid transfer protein (LTP) family protein, similar to pEARLI 1	5.52765	7.12719	4.59479	3.73213	3.10862	2.98185	2.9862
AT1G30110	diadenosine 5,5-P1,P4-tetraphosphate hydrolase, putative	5.4014	2.2974	4.59479	-1.38191		1.29146	1.29436
AT4G16260	glycosyl hydrolase family 17; similar to glucan endo-1,3-beta-glucosidase	23.1563	2.09459	4.59479	27.2213		1.82175
AT2G30750	AtCYP71A12 cytochrome P450	6.80534	2.14355	4.59479	4.59479		2.0329
AT5G57220	CYP81F2 cytochrome p450 family	6.9644	2.14355	4.48985	-2.3511		2.29607
AT1G65390	disease resistance protein (TIR class), putative	6.20458	2.19365	4.48985	-3.1748
AT1G68150	AtWRKY9 transcription factor	7.12719	3.64689	4.3873	3.24901		4.02432	3.70662
AT1G26380	FAD-linked oxidoreductase family protein	8.37835	2.82843	4.3873	1.95432		1.67972
AT3G47050	glycosyl hydrolase family 3; beta-D-glucan exohydrolase	1.41421	1.31951	4.3873	-2.9622		1.96928
AT1G64170	hypothetical protein	6.20458	3.40267	4.3873	-2.7007
AT4G35180	amino acid permease - like protein	4.70219	9.40438	4.28709	6.6499		3.20873
AT3G18250	hypothetical protein	4.8121	4	4.18918	1.95432		2.69016
AT2G47140	short-chain dehydrogenase/reductase (SDR) family protein	5.15748	2.2974	4.0935	1.5874		1.59031	1.42008
AT4G25350	EXS family protein / ERD1/XPR1/SYG1 family protein, similar to PHO1 protein	8.9797	3.4822	4.0935	-1.90968	1.05566		1.41826
AT4G21410	serine threonine kinase - like protein	5.27803	2.57874	4.0935	2.46229		2.78444
AT4G22470	extensin - like protein; protease inhibitor/seed storage/lipid transfer protein (LTP) family protein	4.8121	3.03143	4	2.89454		1.13134	1.31999
AT2G44380	CHP-rich zinc finger protein, putative	4.3873	2.7007	4	-6.06287		3.43607	3.36022
AT1G61560	AtMLO6 seven transmembrane MLO family protein	4.0935	2.2974	3.90864	2.40605		1.24077
AT1G51800	receptor protein kinase, putative	7.12719	3.56359	3.90864	-1.20303		2.96678	2.56646
AT2G41660	expressed protein	2.9622	8.57419	3.81937	-1.25992
AT5G37580	tropomyosin-related protein	4.48985	1.5874	3.81937	-1.82344
AT5G11210	AtGLR2.5 member of Putative ligand-gated ion channel subunit family	8.7746	4.8121	3.81937	1.95432		1.2436
AT5G13080	AtWRKY75 transcription factor	7.29378	3.1748	3.73213	11.5782	1.17489	1.55807
AT4G16350	AtCBL6 Calcium sensor protein. Binds CIPK14.	4.0935	2.3511	3.73213	1.35035		2.26111
AT4G20000	VQ motif-containing protein	4.70219	3.32495	3.73213	-9.84916
AT4G11170	disease resistance protein (TIR-NBS-LRR class), putative	3.64689	2.51984	3.73213	1.7411		1.78289
AT1G21310	proline-rich extensin-like family protein contains extensin-like region	3.64689	3.73213	3.73213	3.24901
AT2G29100	putative ligand-gated ion channel protein	6.20458	5.52765	3.64689	1
AT2G42360	putative RING zinc finger protein	3.90864	3.40267	3.64689	1.4811		1.44425	1.46724
AT2G37430	putative C2H2-type zinc finger protein; likely a nucleic acid binding protein	3.73213	3.1748	3.64689	-2
AT5G64120	peroxidase, putative	3.03143	3.40267	3.56359	1.86607	1.7185	1.411	2.37766
AT4G32650	potassium channel protein AtKC	3.81937	2.04675	3.56359	-1.1487		1.05928	1.40927
AT1G51620	protein kinase, putative	3.4822	3.90864	3.56359	1.31951		1.47116	1.36207
AT5G01560	receptor like protein kinase	3.1748	3.03143	3.56359	-1.12246		1.74958	1.44737
AT1G51790	receptor protein kinase, putative	4.59479	2.57874	3.56359	-1.35035		2.2598	2.0885
AT2G27660	hypothetical protein	3.03143	4.28709	3.56359	-1.02337		2.97721	2.52623
AT1G78000	high affinity sulphate transporter, putative	5.78908	2.09459	3.56359	-1.66248		1.83937
AT5G64530	no apical meristem (NAM) family protein	2.7007	6.20458	3.56359	30.5549		2.12561
AT2G22880	VQ motif-containing protein	3.90864	3.32495	3.4822	2.3511		1.15497
AT2G40180	protein phosphatase 2C (PP2C)	5.03968	3.1748	3.4822	-1.25992
AT1G65690	harpin-induced protein-related / HIN1-related / harpin-responsive protein-related	5.03968	2.63902	3.40267	2.63902	1.52213	2.03058	1.87401
AT3G52450	U-box domain-containing protein, similar to immediate-early fungal elicitor protein CMPG1 (Petroselinum crispum)	4.92458	3.32495	3.40267	-1.23114		2.27937	2.13079
AT5G61560	putative protein, similarity to disease resistance protein kinase Pto	5.03968	1.82344	3.40267	1.95432
AT5G04860	unknown protein	4.0935	3.4822	3.32495	1.70133			1.76877
AT4G27730	AtOPT6 Oligopeptide Transporter	3.1748	3.32495	3.32495	-8.7746
AT2G02220	leucine-rich repeat transmembrane protein kinase, putative	3.73213	2.04675	3.24901	-2.9622
AT2G24570	AtWRKY17 transcription factor	2.76383	3.03143	3.24901	1		1.54718	1.45842
AT4G20460	UDP-glucose 4-epimerase - like protein	3.73213	2.2974	3.24901	1.17555		1.83055	1.74918
AT5G09800	putative protein	2.57874	2.7007	3.24901	1.04729
AT1G02360	glycosyl hydrolase family 19, putative chitinase	3.24901	4.48985	3.1748	-1.44727		3.17056
AT1G21120	O-methyltransferase, putative	3.81937	2.63902	3.1748	-14.5876
AT2G37040	AtPAL1 Phenylalanine ammonia lyase	3.24901	1.38191	3.10229	1.6245	1.2859	1.42773	1.19262
AT3G45060	high-affinity nitrate transporter - like protein	4.18918	4.18918	3.10229	-1.09682	1.73267	1.38148	1.05483
AT1G28390	wall-associated kinase like protein	3.81937	1.90968	3.10229	1.70133	1.50617	1.71897
AT1G18380	hypothetical protein	3.4822	2.76383	3.10229	-1.25992		1.0905
AT1G05300	putative zinc transporter	4.48985	3.4822	3.10229	-4.28709		1.33391
AT5G24230	putative protein	3.56359	2.57874	3.10229	-1.23114
AT2G25470	putative disease resistance protein	5.52765	3.10229	3.10229	-2.51984
AT1G65400	disease resistance protein (TIR class), putative	4.0935	2.51984	3.10229	-2.57874
AT2G02230	F-box family protein / SKP1 interacting partner 3-related	3.32495	2.89454	3.10229	-1.09682
AT5G57480	AAA-type ATPase family protein	2.9622	2.7007	3.03143	-1.35035		1.55439
AT3G54420	AtEP3 Class IV chitinase	2.7007	4.92458	3.03143	-2.24492		2.03751
AT5G62150	peptidoglycan-binding LysM domain-containing protein	3.24901	2.76383	3.03143	8.18699		2.40215
AT1G69930	glutathione transferase, putative	5.92439	2.14355	3.03143	30.5549
AT4G23280	serine /threonine kinase - like protein	4.0935	3.4822	3.03143	-1.23114		2.50979	2.37208
AT5G03700	S-receptor kinase - like protein	2.9622	2.14355	3.03143	-2.09459		2.87821	2.46312
AT2G40330	Bet v I allergen family protein, Pathogenesis-related protein Bet v I family	5.92439	5.92439	3.03143	-1.28937
AT1G22900	disease resistance response protein-related; similar to pathogenesis-related protein (Pisum sativum)	3.24901	4.70219	2.9622	-1.09682	2.03509	2.00556	1.76776
AT3G13610	amino acid permease family protein	3.81937	4.28709	2.9622	19.6983
AT3G23250	AtMYB15 transcription factor	5.65685	2.63902	2.9622	1.7411
AT1G16130	AtWAKL2 WAK-like kinase	3.24901	1.90968	2.9622	-2.57874
AT5G01550	receptor like protein kinase	4.3873	1.86607	2.9622	1.12246		1.40553	1.50722
AT5G55930	AtOPT1 Oligopeptide transporter	2.57874	3.56359	2.89454	2.63902	1.03295
AT5G02780	In2-1 protein, putative	6.80534	7.46426	2.89454	3.1748	1.60673	1.74826
AT1G26420	FAD-linked oxidoreductase family protein	4.70219	3.1748	2.89454	-2.19365		1.47054
AT1G26410	FAD-linked oxidoreductase family protein	13.2998	5.03968	2.89454	-1.51572		2.07353
AT4G23190	AtCRK11 putative receptor-like kinase	4.0935	2.51984	2.89454	-2.46229
AT3G22060	receptor kinase common family, putative	3.56359	2.24492	2.82843	-1.51572	1.5707	1.71737	1.97943
AT3G23530	cyclopropane fatty acid synthase, putative / CPA-FA synthase, putative, similar to cyclopropane synthase	4.70219	-1.17555	2.82843	1.20303		1.28373
AT5G44990	putative protein	8	2.9622	2.82843	9.40438		1.30045
AT2G41010	VQ motif-containing protein	2.46229	2.7007	2.82843	1.17555		1.35439
AT1G51890	leucine-rich repeat protein kinase, putative similar to light repressible receptor protein kinase	4.18918	3.03143	2.82843	-1.66248		1.36896
AT3G59700	AtHLECRK member of Receptor kinase-like protein family	3.1748	2.19365	2.82843	1.23114
AT4G04510	putative receptor-like protein kinase	3.32495	3.64689	2.82843	1.02337
AT1G21120	O-methyltransferase 1, putative	4.0935	3.32495	2.82843	-5.92439
AT2G35930	U-box domain-containing protein similar to immediate-early fungal elicitor protein CMPG1	3.24901	2.9622	2.76383	-1.28937		1.68052	1.58156
AT3G07390	expressed protein	3.03143	3.32495	2.76383	1.44727		2.03228	1.92728
AT2G35910	putative RING zinc finger protein	2.63902	2.51984	2.76383	-1.04729		2.28441	2.04233
AT5G44390	FAD-linked oxidoreductase family protein	4.8121	1.82344	2.76383	1.1487	1.3745		1.12059
AT5G38900	DSBA oxidoreductase family protein	4.48985	3.03143	2.76383	1.90968		1.87227
AT1G51920	hypothetical protein	3.81937	3.40267	2.76383	-1.5874		2.23306
AT4G18430	AtRABA1e RAB GTPase	4.8121	4.48985	2.76383	1.70133		2.90483
AT5G05190	putative protein	3.56359	2.40605	2.76383	1.66248			1.14919
AT4G39670	putative protein	3.24901	3.73213	2.76383	6.06287
AT5G58660	oxidoreductase, 2OG-Fe(II) oxygenase family protein, similar to ACC oxidase	5.4014	2.76383	2.76383	1.90968
AT1G24530	transducin family protein / WD-40 repeat family protein	3.56359	2.19365	2.76383	-2.9622
AT4G36990	At-HsfB1 heat shock transcription factor HSF4	3.1748	3.1748	2.7007	6.80534		1.16514
AT1G47890	disease resistance protein family protein	2.9622	3.24901	2.7007	-1.7411		2.13916
AT5G56870	beta-galactosidase, putative / lactase, putative	2.24492	1.23114	2.7007	-2.19365			1.33073
AT4G39830	L-ascorbate oxidase family protein	3.32495	4	2.7007	1.66248
AT5G37590	kinesin -like protein	3.56359	1.25992	2.7007	-1.25992
AT5G55050	GDSL-motif lipase/hydrolase-like protein	2.89454	3.32495	2.7007	-1.7818
AT1G16090	AtWAKL7 WAK-like kinase	3.81937	3.4822	2.7007	-2.76383
AT5G65600	receptor protein kinase-like protein	8.18699	4.92458	2.63902	1.44727		1.71756
AT1G07160	protein phosphatase 2C (PP2C), putative	5.52765	2.24492	2.63902	-1.38191			1.6341
AT4G19370	hypothetical protein	6.3496	2.51984	2.63902	1.7411
AT4G28350	lectin protein kinase family protein	2.63902	1.95432	2.63902	-4.18918
AT4G31550	AtWRKY11 transcription factor	2.46229	1.7411	2.63902	-1.38191		1.27567	1.56659
AT4G01700	glycosyl hydrolase family 19 (chitinase)	3.03143	6.06287	2.63902	-1.5874		1.54849
AT1G26390	FAD-linked oxidoreductase family protein	5.27803	1.28937	2.63902	2.14355
AT2G30490	AtC4H/AtCYP73A5 cinnamate-4-hydroxylase	2.76383	2.40605	2.57874	1.41421		1.10192	1.10919
AT1G52200	expressed protein	2.7007	2.63902	2.57874	1.07177		1.28649
AT1G60740	peroxiredoxin, putative; similar to type 2 peroxiredoxin	4.28709	6.3496	2.57874	2.57874		1.49302
AT4G19810	glycosyl hydrolase family 18 protein, similar to chitinase/lysozyme	3.4822	3.73213	2.57874	1.07177			1.61884
AT3G23550	MATE efflux family protein, similar to ripening regulated protein DDTFR18	7.12719	1.90968	2.57874	1.55114		1.23206
AT5G67450	AtAZF1 Encodes zinc-finger protein. Induced by low temperature, cold temperatures and high salt	2.9622	4.48985	2.57874	-4.70219			1.31213
AT1G16150	AtWAKL4 WAK-like kinase	3.1748	2	2.57874	-2.24492			2.52233
AT5G06570	putative protein	3.1748	2.14355	2.57874	-1.02337
AT1G66160	U-box domain-containing protein similar to immediate-early fungal elicitor protein CMPG1	3.4822	2.57874	2.57874	-2.46229
AT4G12490	protease inhibitor/seed storage/lipid transfer protein (LTP) family protein similar to pEARLI 1	2.7007	3.24901	2.51984	2.63902	3.24894	2.82234	2.78147
AT3G52190	transducin family protein / WD-40 repeat family protein	3.03143	2.09459	2.51984	1.28937		1.32655	1.35424
AT2G27690	AtCYP94C1	4.28709	3.32495	2.51984	16		1.53317
AT2G38250	putative GT-1-like transcription factor	3.1748	2.04675	2.51984	13.9288
AT1G68620	expressed protein	3.73213	1.90968	2.51984	6.9644
AT4G24240	AtWRKY7 transcription factor	2.7007	2.57874	2.46229	-3.24901		1.48157	1.13581
AT1G27730	AtZAT10 salt-tolerance zinc finger protein	2	2.2974	2.46229	3.81937
AT3G01830	calmodulin-related protein	3.10229	5.03968	2.46229	3.32495
AT4G01750	hypothetical protein	4.3873	2.63902	2.46229	1.04729
AT3G62150	multidrug resistant (MDR) ABC transporter, putative,	10.315	1.07177	2.46229	1.02337
AT4G12480	AtPEARLI 1 protease inhibitor/seed storage/lipid transfer protein (LTP) family protein	2.7007	3.32495	2.40605	2.14355	2.95911	2.94817	2.55063
AT1G19610	plant defensin protein, putative (PDF1.4); plant defensin protein family member	2.3511	2.24492	2.40605	-1.20303	1.53974
AT1G61800	glucose-6-phosphate/phosphate-translocator precursor, putative	2.82843	2.7007	2.40605	9.6242		1.76051
AT5G12340	putative protein; similarity to predicted protein	2.57874	2.3511	2.40605	10.315		2.02435
AT5G13320	auxin-responsive GH3 family protein	2	3.90864	2.40605	12.996
AT5G27420	zinc finger (C3HC4-type RING finger) family protein	2.63902	3.03143	2.40605	1.7818
AT5G25930	receptor-like protein kinase - like	3.73213	1.7411	2.40605	1.6245
AT2G39210	nodulin-like protein	2.89454	2.51984	2.3511	1.7411		1.8633	1.92806
AT1G03850	glutaredoxin family protein	1.90968	3.90864	2.3511	4.0935		2.40569
AT2G39660	putative protein kinase	2.09459	2.2974	2.3511	1
AT5G47100	AtCBL9 member of AtCBLs (Calcineurin B-like Calcium Sensor Proteins)	2.7007	2.46229	2.3511	-1.04729
AT1G63530	unknown protein	2.57874	3.90864	2.3511	-1.17555
AT4G23010	UDP-galactose transporter-related, contains weak similarity to UDP-galactose transporter related isozyme 1	2.51984	1.70133	2.3511	1.02337		1.19708
AT5G42830	N-hydroxycinnamoyl benzoyltransferase-like protein	3.40267	2.82843	2.3511	-1.20303		1.518
AT5G25260	nodulin - like protein	2.63902	3.4822	2.3511	2.51984
AT5G01540	receptor like protein kinase	2.46229	2.19365	2.3511	-4
AT1G17860	lemir (miraculin), putative	2.46229	1.55114	2.2974	-1.25992		1.50111	1.66888
AT5G20050	receptor-like protein kinase - like protein	2.57874	1.7411	2.2974	-2.19365		1.1821
AT1G44130	nucellin, putative	2.82843	5.78908	2.2974	3.4822
AT3G48650	hypothetical protein	3.10229	1.7411	2.2974	2.04675
AT5G15870	glycosyl hydrolase family 81 protein, similar to beta-glucan-elicitor receptor	2.3511	2.46229	2.2974	1.09682
AT3G09270	glutathione transferase, putative	2.63902	4.28709	2.2974	-1.1487
AT5G46080	serine/threonine protein kinase-like protein	3.56359	2.24492	2.2974	-1.31951
AT3G55980	zinc finger (CCCH-type) family protein	2	2.24492	2.2974	-1.5874
AT1G18390	wall-associated kinase, putative; similar to wall-associated kinase 2	2.63902	2.3511	2.2974	-1.7818
AT5G48530	unknown protein	2.51984	1.55114	2.2974	-3.03143
AT1G64400	long-chain-fatty-acid--CoA ligase, putative / long-chain acyl-CoA synthetase, putative	2.76383	2.7007	2.2974	-3.24901
AT4G36670	sugar transporter like protein	2	2.09459	2.24492	-1.25992	2.14407	2.46201	2.58272
AT3G51350	putative protein	2.2974	2.7007	2.24492	-1.07177		1.42501	2.35818
AT3G11340	UDP-glucoronosyl/UDP-glucosyl transferase family protein	2.76383	8.18699	2.24492	7.12719		1.81304
AT3G05360	disease resistance protein family (LRR)	2.19365	2.40605	2.24492	1.12246		2.2165
AT4G04960	lectin protein kinase, putative, similar to receptor lectin kinase 3	2.63902	1.82344	2.24492	-1.7818
AT5G26920	calmodulin-binding protein	2.40605	3.64689	2.19365	3.32495
AT4G33050	putative protein	2.24492	2.57874	2.19365	1.86607
AT1G31930	extra-large guanine nucleotide binding protein, putative / G-protein	2.57874	1.02337	2.19365	-1.31951		1.16283	1.39301
AT4G25110	latex-abundant family protein (AMC2) / caspase family protein	2.82843	3.56359	2.19365	-1.7818		1.37081
AT1G13100	AtCYP71B29 cytochrome P450	1.86607	1.38191	2.19365	-5.52765		1.46459
AT5G53110	putative protein	2.9622	2.9622	2.19365	-2.46229		1.61094
AT1G13340	expressed protein	2.2974	3.90864	2.19365	18.8088
AT3G13380	leucine-rich repeat family protein / protein kinase family protein	1.95432	2.89454	2.19365	1.70133
AT1G02450	NPR1/NIM1-interacting protein 1 (NIMIN-1), identical to NIMIN-1 protein	1.95432	4.48985	2.19365	1.31951
AT3G45650	putative protein	3.03143	2.04675	2.14355	-1.12246	-1.53952	-1.63296
AT5G38710	proline oxidase, mitochondrial precursor -like protein	3.32495	2.19365	2.14355	5.15748		1.0009
AT1G61360	S-locus lectin protein kinase family protein contains protein kinase domain	2.82843	2	2.14355	-1.86607		1.10312
AT1G15520	ABC transporter family protein; similar to ABC1 protein GI:14331118 from (Nicotiana plumbaginifolia)	6.06287	1.7818	2.14355	11.5782		2.03936
AT1G25390	wall-associated kinase, putative; similar to wall-associated kinase 1	2.46229	1.7411	2.14355	-1.95432			1.26399
AT5G20230	blue copper binding protein	1.86607	2.89454	2.14355	2.57874
AT3G51330	putative protein	2.40605	4.59479	2.14355	1.95432
AT4G18250	receptor serine/threonine kinase-like protein	3.56359	3.90864	2.14355	1.4811
AT3G55740	proline transporter 2	1.86607	1.1487	2.14355	-1.6245
AT1G68840	AtRAV2 AP2 domain-containing protein	1.95432	1.17555	2.14355	-2.09459
AT4G18950	protein kinase - like protein	2.19365	1.4811	2.09459	4.18918		1.11632
AT3G21700	putative SGP1 monomeric G-protein	3.10229	1.82344	2.09459	14.2544
AT1G18570	AtMYB51 R2R3-MYB transcription family	2.46229	2.14355	2.09459	1.55114
AT1G74360	leucine-rich repeat transmembrane protein kinase, putative, similar to brassinosteroid insensitive 1	2.46229	2.89454	2.09459	-1.12246
AT1G74030	putative enolase	2.3511	1.25992	2.09459	-1.1487
AT3G28850	glutaredoxin family protein	2.3511	1.95432	2.09459	-1.28937
AT4G01720	AtWRKY47 transcription factor	2.2974	3.03143	2.09459	-2.57874
AT5G50200	AtWR3 Involved in jasmonic acid-independent wound signal transduction.	1.7818	3.73213	2.04675	1	1.01899	1.34475	1.30967
AT5G12420	expressed protein	2.19365	2.3511	2.04675	-2.7007		1.56523
AT1G08050	zinc finger (C3HC4-type RING finger) family protein	1.86607	5.27803	2.04675	4.8121
AT1G70300	AtKUP6 potassium transporter	2.24492	1.28937	2.04675	4.18918
AT4G32870	expressed protein	1.7818	4.48985	2.04675	2.51984
AT4G39270	leucine-rich repeat transmembrane protein kinase, putative	2.89454	2	2.04675	1.02337
AT1G66830	leucine-rich repeat transmembrane protein kinase, putative	3.03143	1.07177	2	-3.81937			1.52361
AT4G17500	AtERF-1, Ethylene Response Factor 1	2.57874	1.28937	2	10.0794
AT5G48540	33 kDa secretory protein-like	2.82843	2.7007	2	-2.9622
AT3G19930	AtSTP4 Encodes a sucrose hydrogen symporter that is induced by wounding.	1.70133	2.09459	2	-3.64689
AT4G02330	pectinesterase family protein	3.24901	3.73213	2	-5.4014
AT4G23810	AtWRKY53 transcription factor	2.09459	2.63902	2	-10.5561
AT2G25460	expressed protein	5.27803	1.09682	1.95432	14.2544
AT5G07150	leucine-rich repeat family protein, contains weak similarity to LRR receptor-like protein kinase	2.14355	6.6499	1.95432	2.63902
AT2G45210	putative auxin-regulated protein	2.09459	2.63902	1.95432	1.82344
AT1G71400	disease resistance family protein / LRR family protein	2.3511	2.09459	1.95432	-2.9622		1.83583
AT4G04490	putative receptor-like protein kinase	2.51984	2.89454	1.95432	1.41421
AT1G53430	receptor-like serine/threonine kinase, putative	3.10229	1.12246	1.95432	-1.70133
AT3G19260	longevity-assurance (LAG1) family protein	2.2974	2.63902	1.90968	-1.41421
AT5G46050	proton-dependent oligopeptide transport (POT) family protein	2.3511	2.7007	1.90968	-2.9622		1.40385	1.45248
AT3G51660	Macrophage migration inhibitory factor (MIF) family	2.51984	2.04675	1.90968	2.7007		1.04637
AT4G27652	Expressed protein	2.14355	2.04675	1.90968	-2.46229		1.23049
AT4G23150	serine/threonine kinase - like protein	2	3.40267	1.90968	1.35035		1.42903
AT1G13110	AtCYP71B7 cytochrome P450	2.51984	1.38191	1.90968	-2.7007		1.8978
AT3G13790	beta-fructosidase (BFRUCT1) / beta-fructofuranosidase / cell wall invertase	1.95432	3.24901	1.90968	-3.32495		1.95055
AT4G38560	Phospholipase like protein	2.04675	2.3511	1.90968	1.17555
AT5G51830	pfkB-type carbohydrate kinase family protein	2.76383	2.7007	1.86607	6.49802		1.0679
AT3G25130	unknown protein	5.52765	-1.82344	1.86607	-1.25992		2.32046
AT1G79450	membrane protein common family	1.82344	2.40605	1.86607	2.04675
AT4G22530	embryo-abundant protein related	2	2.3511	1.86607	1.41421
AT2G02010	glutamate decarboxylase	1.86607	4	1.86607	-3.24901
AT2G25735	Expressed protein	2.19365	2.24492	1.82344	-1.17555	1.12272	1.30379
AT2G26560	patatin, putative; similar to patatin-like latex allergen	2.7007	1.5874	1.82344	-1.23114		1.03196
AT4G02380	late embryogenesis abundant protein-related	1.95432	3.10229	1.82344	5.03968
AT3G05500	rubber elongation factor (REF) family protein	1.66248	4.28709	1.82344	3.40267
AT5G22570	AtWRKY38 transcription factor	1.41421	4.18918	1.82344	1.4811
AT3G16530	legume lectin family protein	3.56359	1.86607	1.82344	1.09682
AT5G64080	protease inhibitor/seed storage/lipid transfer protein (LTP) family protein	3.40267	2.51984	1.82344	-1.6245
AT5G45000	disease resistance protein (TIR class), putative	2.46229	3.03143	1.82344	1.55114		1.35194	1.1913
AT5G03610	GDSL-motif lipase/hydrolase family protein, low similarity to SP|P40602 Anther-specific proline-rich protein APG precursor	3.10229	1.90968	1.7818	11.5782		1.62359
AT2G23770	putative protein kinase	2.3511	1.70133	1.7818	-2.14355		1.70264
AT3G50260	encodes a member of the DREB subfamily A-5 of ERF/AP2 transcription factor family.	1.86607	2.57874	1.7818	13.2998
AT2G18690	expressed protein	1.82344	2.89454	1.7818	2.76383
AT3G19660	unknown protein	2.24492	3.81937	1.7818	1.20303
AT5G17890	disease resistance protein (TIR-NBS-LRR class), putative	2.63902	1.51572	1.7818	-1.17555
AT3G03640	glycosyl hydrolase family 1 protein	1.95432	3.90864	1.7411	-1.4811
AT2G26440	pectinesterase family protein	2.14355	2.9622	1.7411	-2.40605
AT5G37600	GS-GLN1-1 glutamate--ammonia ligase	1.5874	2.7007	1.70133	-1.23114			1.12885
AT1G63840	putative RING zinc finger protein	2.19365	2.40605	1.70133	3.56359
AT1G01340	AtCNGC10 member of Cyclic nucleotide gated channel family	1.44727	2.9622	1.70133	3.32495
AT2G37710	lectin protein kinase, putative	1.70133	2.89454	1.70133	-2.76383
AT3G49780	AtPSK3 Phytosulfokine 3 precursor, coding for a unique plant peptide growth factor.	2.09459	2.7007	1.66248	1.09682
AT1G13830	beta-1,3-glucanase-related, similar to beta-1,3-glucanase-like protein	1.4811	2.2974	1.66248	-1.28937
AT5G52810	ornithine cyclodeaminase/mu-crystallin family protein	1.6245	3.03143	1.66248	-1.51572
AT5G58940	receptor-like protein kinase precursor - like	1.90968	2.2974	1.66248	-8
AT1G61120	S-linalool synthase	5.52765	3.56359	1.6245	21.6056	1.96715	1.19723
AT4G36640	putative protein	2.40605	1.31951	1.6245	1.55114		1.04498
AT1G33390	RNA helicase, putative	2.57874	1.41421	1.6245	-2.09459		1.2723
AT2G38860	expressed protein	2.51984	2.51984	1.6245	1.5874		2.42197
AT5G17760	AAA-type ATPase family protein	1.70133	3.64689	1.6245	4.8121
AT1G32960	subtilisin-like serine protease	3.40267	1.90968	1.6245	4.59479
AT4G31800	AtWRKY18 transcription factor	1.7818	3.1748	1.6245	2
AT1G68765	Expressed protein	4	2.24492	1.6245	-2.46229
AT5G46230	expressed protein	1.7411	4.0935	1.5874	1.35035		1.27961
AT4G39030	EDS5 Essential component of salicylic acid-dependent signaling for disease resistance, member of the MATE-transporter family	1.4811	2.7007	1.5874	5.92439		1.50166
AT2G29460	AtGSTU4 Encodes glutathione transferase belonging to the tau class of GSTs.	4.28709	2.09459	1.5874	12.1257
AT1G57630	disease resistance protein (TIR class), putative	1.7411	4.3873	1.5874	6.49802
AT5G10695	Expressed protein	2	4.48985	1.5874	2
AT5G25440	protein kinase family protein	1.7818	2.40605	1.5874	1.4811
AT5G02490	heat shock cognate 70 kDa protein 2 (HSC70-2)	1.44727	4.3873	1.5874	1.23114
AT2G43620	glycosyl hydrolase family 19 (chitinase); similar to basic endochitinase CHB4 precursor	1.28937	6.3496	1.55114	1.07177			2.18847
AT1G66690	S-adenosyl-L-methionine:carboxyl methyltransferase family protein, similar to defense-related protein cjs1	10.0794	4.28709	1.55114	2.04675
AT5G24210	PRLIP1 pathogen SA inducible lipase	1.7818	3.03143	1.55114	1.90968
AT4G23610	50S ribosomal protein-related	1.82344	3.10229	1.55114	-1.82344
AT1G28190	hypothetical protein	2.24492	1.95432	1.51572	2.89454
AT3G53230	cell division cycle protein 48, putative / CDC48, putative	1.70133	4.0935	1.51572	2.24492
AT1G09630	AtRABA1a Rab GTPase	1.70133	2.24492	1.51572	-1.51572
AT3G24954	disease resistance family protein / LRR family protein	2.7007	3.90864	1.4811	-1.66248
AT5G06750	protein phosphatase 2C family protein / PP2C family protein, similar to Ser/Thr protein phosphatase 2C (PP2C6)	1.38191	2.46229	1.4811	2.82843
AT3G47480	putative calcium-binding protein	1.51572	5.03968	1.44727	1.38191		1.38859
AT3G45290	AtMLO3 Seven transmembrane MLO family protein	2.24492	2	1.44727	-5.03968
AT4G21870	heat shock protein - like	2.82843	1.38191	1.44727	-5.03968
AT4G26060	putative protein	1.44727	2.24492	1.41421	4.3873
AT5G05730	AtASA1 anthranilate synthase alpha subunit	2.76383	1.55114	1.41421	3.73213
AT1G73800	calmodulin-binding protein	1.02337	3.10229	1.41421	2.19365
AT4G03450	hypothetical protein	1.82344	2.19365	1.41421	1
AT5G19240	putative protein	1.38191	3.1748	1.41421	-1.25992
AT5G25190	putative protein	-0.233333	-3.9	1.4	0.0666667
AT1G25220	AtASB1 Anthranilate synthase beta subunit, catalyzes the first step of tryptophan biosynthesis	2.57874	1.90968	1.38191	2.3511
AT1G76930	AtEXT1/4 Extensin hydroxyproline-rich glycoprotein	1.5874	2.76383	1.38191	2.14355
AT5G40780	amino acid permease	1.1487	2.89454	1.38191	1.20303		1.05049
AT1G06160	encodes a member of the ERF (ethylene response factor) subfamily B-3 of ERF/AP2 transcription factor family.	3.90864	1.31951	1.38191	1.41421
AT4G01920	DC1 domain-containing protein, similar to A. thaliana CHP-rich proteins	1.55114	2.40605	1.38191	-2.46229
AT1G28480	glutaredoxin, putative	1.31951	3.24901	1.35035	4.70219		1.22731
AT4G23470	hydroxyproline-rich glycoprotein family protein, contains proline-rich extensin domains	1.31951	2.51984	1.35035	2.14355
AT1G67810	hypothetical protein	1.90968	3.1748	1.31951	2.82843
AT4G14365	zinc finger (C3HC4-type RING finger) family protein / ankyrin repeat family protein	1.51572	2.40605	1.31951	1.12246
AT2G13790	putative receptor-like protein kinase	1.23114	2.2974	1.31951	1.07177
AT2G36330	hypothetical protein	1.7818	2.2974	1.31951	-1.07177
AT4G13510	AtAMT1 ammonium transport protein	1.17555	2.7007	1.31951	-1.95432
AT2G30550	lipase class 3 family protein, similar to DEFECTIVE IN ANTHER DEHISCENCE1	1.35035	2.3511	1.28937	5.52765
AT1G32350	alternative oxidase, putative, similar to Alternative oxidase 1a	3.90864	1.4811	1.25992	4.18918
AT2G47800	AtMRP4 glutathione-conjugate transporter	1	4.0935	1.25992	-1.7411
AT4G35630	phosphoserine aminotransferase, putative	2.14355	1.44727	1.23114	3.32495		1.23641
AT5G61160	transferase family protein, similar to anthocyanin 5-aromatic acyltransferase from Gentiana triflora	9.18959	1.12246	1.23114	1.12246
AT3G22600	protease inhibitor/seed storage/lipid transfer protein (LTP) family protein	1.09682	2.3511	1.23114	-1.12246
AT2G27920	serine carboxypeptidase S10 family protein	1.38191	2.24492	1.20303	-4.18918
AT3G50930	AAA-type ATPase family protein	1.90968	2.46229	1.17555	2.57874
AT3G43250	cell cycle control protein-related	8.7746	6.49802	1.1487	35.9188
AT3G49620	AtDIN11 putative oxidoreductase	6.06287	1.95432	1.1487	5.92439
AT4G14390	hypothetical protein	1.20303	2.76383	1.1487	-3.03143
AT5G62770	putative protein	1.12246	2.76383	1.12246	-1.23114
AT2G39420	esterase/lipase/thioesterase family protein	2.7007	-1.31951	1.09682	3.32495
AT2G39850	AS-ASN1 glutamine-dependent asparagine synthetase	-0.566667	-2	0.9	4.56667		-1.24591
AT4G38860	putative protein	-2.03333	-2	0.433333	-2.2		-2.46297
AT5G14920	copper binding - like protein	-0.3	-2.26667	0.366667	0.4
AT4G08685	fasciclin-like arabinogalactan-protein, putative (FLA13)	-1.26667	-0.8	0.0666667	-2.7
AT5G27930	unknown protein	0.366667	-2	1.85037e-17	0.366667
AT1G51115	expressed protein	-0.7	-1.23333	9.25186e-18	1.2
AT5G23010	hypothetical protein	0.233333	-1.1	-0.0333333	-1.4
AT4G15440	MATE efflux family protein, putative	0.766667	-1.56667	-0.0333333	2.93333
AT5G01520	expressed protein	-1.2	-0.666667	-0.133333	-1.7		-1.57272
AT5G02940	glycosyl hydrolase family 3	0.266667	-1.46667	-0.133333	-1.6
AT5G64860	receptor-like protein glossy1 (gl1), putative	-1.43333	-1.43333	-0.133333	-0.2
AT1G35180	arabinogalactan-protein (AGP7)	-0.366667	-1.6	-0.233333	1.06667
AT5G62280	putative protein	-1.06667	-1.73333	-0.233333	-0.7
AT5G13930	putative protein	-2.2	-1	-0.233333	-1.46667
AT5G06710	SF16 -like protein	-1.06667	-1.33333	-0.233333	-1.6
AT3G50240	membrane channel like protein	-1	-1.33333	-0.266667	-2	-1.42069
AT3G58120	histone H1	-0.9	-1.4	-0.266667	-1.9
AT1G28330	putative lectin; contains Pfam profile: PF01419 jacalin-like lectin domain	-0.133333	-1.03333	-0.333333	1.26667
AT1G14700	putative protein	-1.26667	-0.933333	-0.333333	-4.06667		-1.6981
AT3G08030	polysaccharide lyase family 1 (pectate lyase)	-1.6	-1.1	-0.333333	-3.3
AT5G02760	protein phosphatase - like protein	-0.666667	-2.56667	-0.366667	-1.63333	-1.7683	-2.34002
AT5G24490	IAA29 auxin-responsive AUX/IAA family protein	-1.26667	-1.73333	-0.366667	-1.4
AT4G12980	PIN7 auxin transport protein, putative auxin transport protein	-0.7	-1.56667	-0.366667	-2.56667
AT5G47240	AtTIP2;1, delta-TIP, delta tonoplast integral protein, water channel protein, aquaporin, MIP (Major Intrinsic Protein) family	-1.3	-2.63333	-0.4	-1.2
AT5G45680	putative protein	-0.7	-1.2	-0.4	-1.33333
AT5G08000	fasciclin-like arabinogalactan-protein (FLA7)	-1.23333	-1.26667	-0.433333	-1.56667
AT5G66920	putative protein	-0.933333	-2.16667	-0.433333	0
AT5G63180	sugar-phosphate isomerase - like protein	-1	-1.46667	-0.433333	-0.666667
AT3G63140	lipid transfer protein; glossy1 homolog	-1.13333	-1.1	-0.433333	-1.76667
AT1G19670	GDSL-motif lipase/hydrolase-like protein	-2	-3.16667	-0.433333	-2.9
AT3G48200	AUX1/MAP1/WAV5 amino acid permease	-0.8	-1.53333	-0.466667	-2.03333		-1.25022
AT4G17460	expressed protein	-0.466667	-1.56667	-0.466667	1.93333
AT5G16030	acid phosphatase, putative	-0.7	-2	-0.5	0.433333		-1.94945
AT5G58140	tubulin beta-1 chain	-0.866667	-3	-0.5	-0.8		-1.07608
AT5G21100	jasmonate inducible protein isolog	-0.266667	-1.26667	-0.5	0.9
AT4G27440	peptide transporter - like protein	-1.26667	-1.23333	-0.5	-2.33333
AT4G14440	expressed protein	-1	-2	-0.533333	1.66667		1.10042
AT5G52100	ATT1 (Aberrant induction of Type Three genes), CYP86A2 involved in cutin biosynthesis for cuticle membrane	-1.3	-1.86667	-0.533333	-1.06667
AT5G51550	hypothetical protein	-1.33333	-0.866667	-0.533333	-1.13333
AT5G45950	polygalacturonase, putative	-1.56667	-1.53333	-0.533333	-1.26667
AT5G45040	leucine rich repeat protein family	-0.866667	-1.7	-0.533333	-1.33333
AT5G22460	homeobox-leucine zipper protein HAT14 (HD-Zip protein 14)	-1.1	-1.1	-0.533333	-1.43333
AT5G02890	carnitine racemase like protein	-1.23333	-0.433333	-0.533333	-1.63333
AT4G33220	putative protein	-1.5	-1.36667	-0.533333	-2.3
AT5G47610	expressed protein	-0.7	-1.7	-0.566667	-1.2
AT5G45930	putative protein	-0.7	-1.26667	-0.566667	-1.26667
AT4G01080	calmodulin-binding protein	-0.4	-1.13333	-0.566667	-2.76667
AT1G02200	pectinesterase (pectin methylesterase) family	-0.4	-1.6	-0.566667	-4.6
AT4G18970	fatty acid elongase 3-ketoacyl-CoA synthase 1 (KCS1)	-1.1	-1.46667	-0.566667	-2.53333	-2.786
AT4G04630	lectin - like protein	-0.633333	-1.13333	-0.566667	-2.7
AT4G03210	potassium transporter, putative	-1.1	-1	-0.566667	-2.73333
AT5G18060	SAUR-23 small auxin up-regulated RNA auxin-induced protein-like	-1.56667	-1.8	-0.6	-1.46667
AT3G48610	dormancy-associated protein, putative	-1.4	-0.3	-0.6	-2.03333
AT4G24510	putative protein kinase	-0.8	-1.5	-0.6	-2.43333
AT1G66760	ARR9, response regulator 9, type A, cytokinin induced	-1.33333	-2.8	-0.6	-2.96667
AT1G22740	DHHC-type zinc finger protein, putative	-1.06667	-1.53333	-0.6	-4.6
AT1G23480	glycosyl hydrolase family 14 (beta-amylase)	-1.1	-0.866667	-0.6	-5.26667
AT3G18890	leucine-rich repeat transmembrane protein kinase, putative	-1.46667	-1.4	-0.633333	-3.06667			-1.68425
AT4G37080	protein phosphatase 2C (PP2C), putative	-1.06667	-0.633333	-0.633333	0.666667
AT1G31710	putative aquaporin (water channel protein)	-1.36667	-1.03333	-0.633333	0.4
AT4G00400	multidrug resistance P-glycoprotein, putative	-1.43333	-1.66667	-0.633333	-2.83333
AT1G79720	expressed protein	-2.23333	-0.833333	-0.633333	-3.7
AT2G21640	P-Protein - like protein	-1.13333	-1.43333	-0.633333	-4.33333
AT2G36145	putative protein	-2.1	-2.1	-0.633333	-4.26667		-2.03823
AT5G58260	hypothetical protein	-1	-2.8	-0.633333	-0.766667		-1.88027
AT5G44130	arabinogalactan-protein (AGP9)	-0.8	-1.7	-0.633333	-1.33333
AT5G18660	hypothetical protein	-0.966667	-2.06667	-0.633333	-1.43333
AT3G50440	lipase/hydrolase, putative	-1.3	-0.7	-0.633333	-1.96667
AT4G12420	pectinesterase family	-1.4	-1.06667	-0.633333	-2.66667
AT3G19710	pectinesterase (pectin methylesterase) family	-1.26667	-1.1	-0.633333	-3.1
AT1G27460	Expressed protein	-1.2	-0.766667	-0.633333	-4.83333
AT2G24762	leucine-rich repeat transmembrane protein kinase, putative	-1.06667	-1.1	-0.666667	-4.26667			-1.66634
AT3G54050	lipid-transfer protein-like protein	-1.4	-1.3	-0.666667	-1.96667		-1.56143
AT4G04840	fimbrin 2	-1.16667	-2.16667	-0.666667	-2.73333
AT3G18050	cobalamin biosynthesis protein	-1.1	-1.33333	-0.666667	-3.26667
AT1G01120	serine carboxypeptidase II-like protein	-1.23333	-0.833333	-0.666667	-3.76667
AT4G32280	expressed protein	-1.13333	-1.6	-0.7	-2.3		-2.39745	-1.49301
AT1G74670	hypothetical protein	-0.266667	-1.7	-0.7	-3.56667		-3.3677
AT1G14345	putative calcium-binding protein, calreticulin	-1.1	-1.1	-0.7	-3.73333		-1.15731
AT5G64620	putative protein	-1.4	-1.5	-0.7	-0.366667
AT5G57170	xyloglucan endotransglycosylase, putative	-1.63333	-1.33333	-0.7	-0.966667
AT5G52780	putative protein	-1.53333	-1.1	-0.7	-1.03333
AT5G46690	putative aspartyl protease	-0.966667	-1.2	-0.7	-1.2
AT4G39330	putative protein	-1.53333	-0.633333	-0.7	-2.16667
AT4G03190	CAD1 cinnamyl-alcohol dehydrogenase CAD1	-1.8	-1.86667	-0.7	-2.73333
AT1G21440	hypothetical protein	-1.43333	-1	-0.7	-3.63333
AT1G78060	putative protein	-1.03333	-1.2	-0.7	-3.9
AT2G31790	subtilisin-like serine protease	-1.3	-1.8	-0.7	-4.3
AT4G24350	AtFLA9 fasciclin-like arabinogalactan-protein 9	-1.1	-0.866667	-0.733333	-2.43333	1.97889	1.59635
AT5G51950	2-dehydro-3-deoxyphosphooctonate aldolase, putative	-0.8	-1.36667	-0.733333	-1.03333
AT5G48900	LAX1 AUX1-like permease, auxin influx carrier	-1.16667	-1.36667	-0.733333	-1.16667		-2.28727
AT4G38840	putative protein	-0.766667	-1.83333	-0.733333	-2.2		-1.93016
AT3G57040	expressed protein	-1.86667	-2.16667	-0.733333	-1.93333		-1.58099
AT5G11420	similar to cold acclimation protein WCOR413 (Triticum aestivum)	-1.66667	-1.36667	-0.733333	-1.53333		-1.569
AT5G09660	putative protein	-1.76667	-1.93333	-0.733333	-1.56667		-1.43553
AT3G08920	formamidase - like protein	-1	-1.7	-0.733333	-3.36667		-1.23541
AT1G42970	multidrug resistance P-glycoprotein, putative	-1	-1.26667	-0.733333	-3.43333		-1.15428
AT1G56720	myosin-like protein	-0.0666667	-1.66667	-0.733333	1.6
AT1G30250	proline-rich protein, putative	-1.4	-1.3	-0.733333	1.06667
AT5G20270	COR15a cold-regulated protein cor15a precursor	-1.46667	-0.7	-0.733333	0.866667
AT5G18670	xyloglucan endotransglycosylase (XTR3)	-1.36667	-0.9	-0.733333	-1.46667
AT3G45970	glycosyl hydrolase family 9	-1.16667	-1.43333	-0.733333	-2.06667
AT3G45160	putative protein	-2.1	-2.56667	-0.733333	-2.06667
AT4G24750	plastid ribosomal protein S6, putative	-1.16667	-0.866667	-0.733333	-2.4
AT5G49100	unknown protein	-1.1	-1.53333	-0.766667	-1.16667	-1.54014
AT3G47340	expressed protein	-1.3	-1.23333	-0.766667	-2.03333	1.67142	1.74218
AT5G49730	peptidyl-prolycis-trans isomerase protein	-0.9	-2.03333	-0.766667	-1.16667		-1.64358
AT5G17520	Betafruct3, beta-fructofuranosidase 3, vacuolar invertase	-0.833333	-1.56667	-0.766667	0.533333		-1.54489
AT4G00950	carbonic anhydrase, chloroplast precursor	-1.36667	-1.83333	-0.766667	-2.8
AT4G18440	photosystem II 5 KD protein	-1.36667	-1.16667	-0.766667	-3
AT3G14240	putative GDSL-motif lipase/hydrolase	-2.1	-1.73333	-0.766667	-3.26667
AT3G05910	unknown protein	-0.966667	-2.13333	-0.766667	-3.33333
AT3G10525	1-aminocyclopropane-1-carboxylate oxidase (ACC oxidase), putative	-2	-2.86667	-0.766667	-3.33333
AT3G08940	glycosyl hydrolase family 1	-0.733333	-1.46667	-0.766667	-3.36667
AT2G40610	photolyase/blue-light receptor (PHR2); supported by full-length Cdna	-1.26667	-0.9	-0.766667	-2.93333		-3.58174
AT5G39210	CHS Chalcone Synthase, flavenoid biosynthesis (naringenin-chalcone synthase)	-2.13333	-3.4	-0.766667	-1.4
AT4G19170	lipid transfer protein, putative	-1.43333	-0.766667	-0.8	-2.5		-2.12393
AT5G44410	polysaccharide lyase family 1 (pectate lyase); similar to pectate lyase	-1.2	-2.33333	-0.8	-1.36667		-1.50046
AT5G25460	copper amine oxidase, putative	-0.733333	-1.13333	-0.8	0.2
AT3G58990	glycosyl hydrolase family 31 (alpha-xylosidase)	-0.766667	-1.7	-0.8	-1.9
AT3G50685	Ras-related GTP-binding protein (Rab7	-1.53333	-2.3	-0.8	-1.96667
AT4G37800	hypothetical protein	-1.46667	-1.83333	-0.8	-2.2
AT4G30020	glycosyl hydrolase family 35 (beta-galactosidase)	-1.56667	-2.23333	-0.8	-2.3
AT4G22200	unknown protein	-1.53333	-1.7	-0.8	-2.46667
AT3G26060	unknown protein	-1.2	-1.23333	-0.8	-3.23333
AT3G21670	thioredoxin f1	-1.23333	-0.966667	-0.8	-3.26667
AT1G68780	unknown protein; contains similarity to anthranilate synthase large subunit	-0.533333	-2.06667	-0.8	-3.56667
AT1G14030	proline-rich protein, putative	-2.2	-1.13333	-0.8	-4
AT1G11700	putative protein	-1.26667	-0.366667	-0.8	-4.03333
AT1G12010	leucine-rich repeat transmembrane protein kinase, putative	-0.766667	-1.9	-0.8	-4.7
AT4G12830	vegetative storage protein-like	-1.56667	-1	-0.833333	-2.56667		-2.35702
AT5G43750	expressed protein	-0.966667	-1.53333	-0.833333	-1.36667		-1.67701
AT2G47440	cytochrome p450 family	0.0666667	-2.13333	-0.833333	3.03333
AT5G64040	expressed protein	-1.36667	-2	-0.833333	-0.566667
AT5G48460	putative protein	-1.2	-0.833333	-0.833333	-1.16667
AT5G01240	Expressed protein	-1.63333	-1.4	-0.833333	-1.73333
AT3G63160	fatty acid elongase 1 (FAE1), putative	-1.23333	-1.63333	-0.833333	-1.76667
AT4G12970	glycosyl hydrolase family 1	-1.06667	-1.3	-0.833333	-2.56667
AT1G07050	RHD1, susceptibility homeodomain transcription factor	-1.4	-2.26667	-0.833333	-2.96667
AT1G55360	expressed protein;	-1.3	-0.966667	-0.833333	-3.13333
AT1G27950	F-box protein GRR1-like protein 1, AtFBL18	-1.03333	-1.2	-0.833333	-3.43333
AT1G55330	glyceraldehyde-3-phosphate dehydrogenase	-1.33333	-1.1	-0.833333	-3.46667
AT1G64510	photosystem I reaction center subunit PSI-N precursor (PSI-N)	-1.3	-1.23333	-0.833333	-3.86667
AT1G24020	fatty acid elongase - like protein (cer2-like)	-1.36667	-1.23333	-0.866667	-4.2	-2.30114		-2.68467
AT3G47430	putative protein	-1.26667	-1	-0.866667	-2.03333		-1.21944
AT3G16250	xyloglucan endotransglycosylase, putative	-1.76667	-1.73333	-0.866667	-3.23333		-1.02921
AT5G57800	pectinesterase (pectin methylesterase), putative	-1.4	-1.9	-0.866667	-0.966667
AT4G23820	fructose-bisphosphatase-like protein	-1.16667	-1.2	-0.866667	-2.46667
AT1G29440	hydroxypyruvate reductase (HPR)	-1.4	-1.36667	-0.866667	-3.13333
AT3G18080	mRNA binding protein precursor - like	-1.5	-1.53333	-0.866667	-3.23333
AT1G52400	putative chlorophyll a/b-binding protein	-1.36667	-1.03333	-0.866667	-3.43333
AT1G29450	putative protein	-1.36667	-1.6	-0.866667	-3.5
AT1G52190	mrp protein, putative	-1.2	-1.2	-0.866667	-3.53333
AT2G41730	ferredoxin; supported by full-length cDNA: Ceres:22861.	-1.06667	-0.6	-0.866667	-3.63333
AT1G15260	putative protein	-1.73333	-1.03333	-0.9	-4	-1.18294
AT3G60290	SAUR-63 small auxin up-regulated RNA, GH3-like auxin-induced protein auxin-induced protein	-1.46667	-2.1	-0.9	-1.9	-1.10029
AT5G65390	Csf-2-related	-0.866667	-1.56667	-0.9	-0.166667
AT4G39800	unknown protein	-1.3	-1.36667	-0.9	-2.13333
AT4G34980	glycosyl hydrolase family 3	-1.23333	-1.23333	-0.9	-2.23333
AT3G28760	subtilisin-like serine protease	-1.4	-1.1	-0.9	-3.03333
AT1G55370	fructose-bisphosphatase precursor	-1.23333	-1.3	-0.9	-3.46667
AT1G30530	invertase inhibitor homolog	-1.33333	-1.23333	-0.9	-3.83333
AT1G23080	expressed protein	-1.2	-0.833333	-0.9	-4.9
AT5G51720	CER2	-2.2	-1.7	-0.933333	-1.06667		-1.7345
AT3G62750	myo-inositol-1-phosphate synthase	-1.6	-1.7	-0.933333	-1.83333		-1.10481
AT3G24430	mandelonitrile lyase-like protein	-2.2	1.63333	-0.933333	-3.13333		-1.01691
AT3G60530	putative lipid transfer protein	-1.23333	-0.833333	-0.933333	-1.86667
AT4G39710	Expressed protein	-1.4	-1.6	-0.933333	-2.1
AT4G00410	non-phototropic hypocotyl 3	-1.33333	-1.26667	-0.933333	-2.83333
AT3G13000	unknown protein	-1.33333	-0.566667	-0.933333	-3.13333
AT3G20820	putative tropinone reductase	-1.3	-2.5	-0.933333	-3.16667
AT1G29670	kinesin-related protein	-0.933333	-2.96667	-0.933333	-3.53333
AT1G70820	potassium channel protein AKT3	-0.833333	-1.96667	-0.933333	-3.96667
AT2G36870	non phototropic hypocotyl 1-like	-1.4	-1.43333	-0.933333	-4.46667
AT2G28470	putative protein (fragment)	-1.1	-2.06667	-0.933333	-4.56667
AT1G76960	protochlorophyllide reductase precursor	-1.23333	-0.9	-0.933333	-5
AT5G23210	pectinacetylesterase, putative	-1.13333	-1.7	-0.933333	-1.4
AT5G02160	hypothetical protein	-1.6	-0.466667	-0.933333	-1.7
AT1G29660	unknown protein	-1.4	-1.13333	-0.933333	-3.5
AT1G78070	FAD-linked oxidoreductase family	-1.4	-1.2	-0.966667	-3.9	-1.17385
AT3G12610	asparagine synthetase	-1.13333	-1.16667	-0.966667	-2.96667		-1.77626
AT3G62550	glycosyl hydrolase family 17; similar to elicitor inducible chitinase	-1.2	-1.53333	-0.966667	-1.83333		-1.07109
AT5G26330	jasmonate inducible protein, putative	-1.13333	-2.7	-0.966667	0.366667
AT1G74070	aminomethyltransferase-like precursor protein	-1.36667	-1.16667	-0.966667	-3.6
AT1G11860	9-cis-epoxycarotenoid dioxygenase (neoxanthin cleavage enzyme)(NC1)(NCED1), putative	-1.6	-2.13333	-0.966667	-4.73333
AT2G39010	Expressed protein	-1.4	-1.1	-0.966667	-5.66667
AT5G65730	putative protein	-1.86667	-1.6	-0.966667	-0.0666667
AT5G55620	polygalacturonase, putative	-1.16667	-1.7	-0.966667	-1
AT4G01130	putative peroxiredoxin	-1.23333	-1.33333	-0.966667	-2.8
AT1G75680	putative protein	-1.33333	-0.466667	-0.966667	-4.2
AT1G27480	unknown protein	-1.23333	-1.76667	-1	-4.73333	-1.92637	-1.65708
AT3G01440	expressed protein; similar to receptor-like protein kinase	-0.7	-1.53333	-1	-3.36667		-1.91263
AT1G07440	sigma-like factor	-1.06667	-1.76667	-1	-3.66667		-1.46614
AT5G65010	fasciclin-like arabinogalactan-protein (FLA2)	-1.33333	-1.8	-1	-0.266667
AT5G22620	putative protein	-1	-0.566667	-1	-1.43333
AT4G27030	ribosomal protein L18, putative	-1.23333	-0.866667	-1	-2.33333
AT3G17120	putative thiamin biosynthesis protein	-1.46667	-1.06667	-1	-3.13333
AT3G17840	putative protei	-1.6	-1.56667	-1	-3.26667
AT3G06750	F-box protein family	-1.7	-1.06667	-1	-3.3
AT1G29510	microbody NAD-dependent malate dehydrogenase	-1.4	-1.33333	-1	-3.5
AT2G21140	putative xylulose kinase	-1.3	-1.3	-1	-4.53333
AT1G60160	GATA zinc finger protein	-2.56667	-1.73333	-1	-4.66667
AT2G06850	putative ribulose-1,5 bisphosphate carboxylase oxygenase large subunit N-methyltransferase	-1.16667	-1.06667	-1	-5.66667
AT3G43720	hypothetical protein	-1.36667	-1.5	-1.03333	-2.06667
AT4G01330	Expressed protein	-1.4	-0.6	-1.03333	-2.8
AT3G15570	MAM1, 2-isopropylmalate synthase-like; homocitrate synthase-like	-1.13333	-1.46667	-1.03333	-3.13333
AT1G78370	photosystem II oxygen-evolving complex 33 (OEC33)	-1.33333	-1.13333	-1.03333	-3.63333
AT1G67750	putative protein	-1.23333	-1.86667	-1.03333	2.93333
AT4G14750	putative protein	0.866667	-1.43333	-1.03333	1.76667
AT4G12390	putative serine/threonine protein kinase	-1.16667	-1.53333	-1.03333	-2.63333
AT2G43550	putative oxidoreductase	-1.2	-1.5	-1.03333	-3.63333
AT2G01590	putative isoamylase	-1.23333	-1.96667	-1.06667	-5.8		-2.51667
AT4G02630	rhodanese-like domain protein	-1.6	-1.7	-1.06667	-2.76667		-1.22232
AT5G57550	expressed protein	-1.46667	-1.23333	-1.06667	-0.933333
AT5G13400	putative tropinone reductase	-1.73333	-2.56667	-1.06667	-1.5
AT4G28660	glutathione transferase, putative	-1.43333	-2	-1.06667	-2.3
AT4G13840	AIR12 Auxin-Induced in Root cultures 12	-1.33333	-2.13333	-1.06667	-2.53333
AT3G23880	subtilisin-like serine protease	-1.73333	-1.33333	-1.06667	-3.06667
AT3G23760	putative protein	-1.93333	-1.9	-1.06667	-3.13333
AT3G21260	tropinone reductase-I, putative	-1.43333	-1.93333	-1.06667	-3.2
AT1G75750	putative protein; contains similarity to DNA-3-methyladenine glycosylase I	-1.2	-1.66667	-1.06667	-4.16667
AT1G75780	putative protein	-1.33333	-2.1	-1.06667	-4.16667
AT2G04570	trehalose-6-phosphate synthase like protein	-1.53333	-1.43333	-1.06667	-4.46667
AT1G04680	FRO2-like protein; NADPH oxidase-like	-1.5	-2.1	-1.06667	-4.86667
AT2G34620	Expressed protein	-1.56667	-1.03333	-1.06667	-6.1
AT5G20630	nitrate transporter	-1.56667	-2.76667	-1.1	0.966667	-3.31713		-2.48251
AT3G16370	Expressed protein	-1.63333	-1.66667	-1.1	-3.4		-1.13173
AT4G00360	photosystem II protein W - like	-1.4	-1.2	-1.1	-2.83333			1.12351
AT5G01090	subtilisin-like serine protease	-0.5	-1.4	-1.1	-1.76667
AT4G38690	putative transport protein	-0.933333	-1.4	-1.1	-2.16667
AT4G37550	glycosyl hydrolase family 77 (4-alpha-glucanotransferase)	-1.4	-1.53333	-1.1	-2.23333
AT4G25960	ascorbate peroxidase, putative	-1.23333	-2.16667	-1.1	-2.4
AT4G01460	hypothetical protein	-1.66667	0.366667	-1.1	-2.76667
AT3G20100	branched-chain amino acid aminotransferase, putative	-1.23333	-1.76667	-1.1	-3.1
AT3G16460	FKBP-type peptidyl-prolyl cis-trans isomerase	-1.4	-1.4	-1.1	-3.4
AT1G52410	expressed protein	-1.33333	-3.4	-1.1	-3.43333
AT1G29460	hypothetical protein	-1.5	-1.33333	-1.1	-3.5
AT1G02640	hypothetical protein	-1.16667	-1.8	-1.1	-3.66667
AT1G16410	unknown protein; contains similarity to protein kinases	-1.13333	-1.43333	-1.1	-4.03333
AT1G09750	putative receptor-like protein kinase, ERECTA_	-1.7	-1.66667	-1.1	-4.86667
AT2G01760	expressed protein	-1.56667	-1.23333	-1.1	-5.43333
AT3G01500	putative protein	-1.73333	-2.13333	-1.13333	-3.36667		-1.54373
AT3G49260	peroxidase, putative	-1.8	-1.86667	-1.13333	-2
AT4G26530	putative protein	-1.46667	-2.2	-1.13333	-2.4		-3.16124
AT5G58310	thionin, putative	0.1	-3.93333	-1.13333	-0.733333		-2.58218
AT5G23060	putative protein	-1.23333	-1.4	-1.13333	-1.43333		-1.45933
AT5G44680	ARR14, response regulator 14, type B, cytokinin, putative two-component response regulator protein	-1.33333	-1.5	-1.13333	-1.33333		-1.15396
AT2G45340	mutT domain protein-like	-0.433333	-2.36667	-1.13333	3.73333
AT3G56370	arabinogalactan-protein (AGP21)	-1.7	-2.2	-1.13333	-1.93333
AT1G55260	hypothetical protein	-1.33333	-1.66667	-1.13333	-3.46667
AT1G14290	plastocyanin	-1.4	-1.36667	-1.13333	-3.76667
AT2G36430	2-oxoglutarate-dependent dioxygenase family	-1.3	-1.43333	-1.13333	-4.5
AT1G54820	putative protein	-0.833333	-2.63333	-1.13333	-4.63333
AT2G29630	magnesium chelatase subunit of protochlorophyllide reductase	-1.06667	-2.06667	-1.13333	-6.03333	-1.09939	-1.18409
AT3G54690	Macrophage migration inhibitory factor (MIF) family	-1.1	-0.9	-1.13333	-1.93333
AT3G06770	glycosyl hydrolase family 1	-1.33333	-2.13333	-1.13333	-3.3
AT1G49200	SAUR-62 small auxin up-regulated RNA	-1.1	-2.26667	-1.13333	-3.63333
AT1G48350	putative auxin-induced protein	-1.4	-1.93333	-1.13333	-3.9
AT1G09310	peptide transporter, putative	-1.73333	-1.93333	-1.13333	-4.4
AT1G64670	putative fructose bisphosphate aldolase	-1.8	-1.5	-1.16667	-3.86667
AT2G26330	expressed protein	-1.66667	-1.63333	-1.16667	-6.73333
AT1G14150	expressed protein	-1.33333	-1.6	-1.16667	-4		-1.85077
AT2G33570	Expressed protein	-1.2	-2.46667	-1.16667	-2.9		-1.47511
AT1G23740	putative protein	-2.8	-1.63333	-1.16667	-5.26667		-1.44962
AT1G68010	similar to flavin-containing monooxygenase	-1.5	-1.5	-1.16667	-3.53333		-1.39124
AT5G25240	putative protein	-1.46667	-2	-1.16667	0.133333
AT5G58480	anthranilate N-hydroxycinnamoyl/benzoyltransferase-like protein	-1.4	-0.833333	-1.16667	-0.766667
AT5G13630	glycosyl hydrolase family 17	-2.33333	-0.8	-1.16667	-1.5
AT4G38660	RING-H2 finger protein RHA3a, putative	-1.56667	-1.93333	-1.16667	-2.16667
AT3G16240	protein kinase, putative	-2	-2.63333	-1.16667	-3.2
AT1G18650	polysaccharide lyase family 1 (pectate lyase)	-1.76667	-1.16667	-1.2	-2.9	-1.26338
AT1G70760	light-harvesting chlorophyll a/b binding protein	-1.66667	-2.16667	-1.2	-3.93333		-2.02627
AT1G29430	expressed protein	-1.03333	-0.233333	-1.2	-3.53333		-1.94655
AT5G11070	BGL1, Beta Glucosidase, MeJA, wounding and insect feeding induced (similar pattern to LOX2 and VSP)	-1.1	-2.93333	-1.2	1.03333
AT3G03190	glycine cleavage system H protein precursor, putative	-1.5	-1.9	-1.2	-3.33333
AT1G20010	leucine-rich repeat transmembrane protein kinase, putative	-1.5	-1.1	-1.2	-3.7
AT1G76100	similar to unknown protein	-1.53333	-1.66667	-1.2	-3.8
AT1G68560	putative thaumatin-like protein	-2.16667	-2.2	-1.2	-3.9
AT1G52000	myrosinase-associated protein, putative	-1.83333	-1.46667	-1.2	-5
AT2G15090	putative protein	-1.86667	-1.56667	-1.23333	-5.53333	-1.48041
AT1G18620	expressed protein	-1.3	-1.53333	-1.23333	-2.86667
AT2G21210	expressed protein	-1.26667	-2.06667	-1.23333	-4.56667		-2.33282
AT4G23670	glycosyltransferase family	-1.3	-1.2	-1.23333	-2.46667		-1.56041
AT2G47590	Expressed protein	-0.0666667	-1	-1.23333	3.16667
AT5G02230	root cap 1 (RCP1)	-1.16667	-1.2	-1.23333	-1.66667
AT4G33000	Expressed protein	-1.63333	-1.36667	-1.23333	-2.3
AT4G12730	putative protein	-1.2	-0.566667	-1.23333	-2.56667
AT3G28860	expressed protein	-0.866667	-1.56667	-1.23333	-3.1
AT3G23805	UDP-glycosyltransferase family	-1	-1.03333	-1.23333	-3.13333
AT3G15520	expansin, putative	-1.86667	-1.46667	-1.23333	-3.26667
AT2G45600	Expressed protein	-1.83333	-1.63333	-1.26667	-6.8	-1.20806
AT1G65230	glutathione transferase, putative	-1.46667	-1.76667	-1.26667	-4.23333		-1.94455
AT2G15970	expressed protein	-1.13333	0.3	-1.26667	-5.36667		-1.12713
AT3G50820	glycosyl hydrolase family 17	-1.5	-1.9	-1.26667	-1.96667		-1.1104
AT4G09010	expressed protein	-1.76667	-1.53333	-1.26667	-2.66667
AT1G32470	expressed protein	-1.43333	-2.43333	-1.3	-3.63333		-1.43945
AT1G64780	expansin, putative	-2.76667	-2.36667	-1.3	-4.1		-1.30047
AT3G09580	xyloglucan endotransglycosylase (ext/EXGT-A1)	-2.9	-2.23333	-1.3	-3.3		-1.28988
AT5G67150	adenylosuccinate lyase - like protein	-0.2	-1.56667	-1.3	0.0333333
AT5G44260	phosphoglucomutase, putative	-1.06667	-2.6	-1.3	-1.36667
AT5G44020	expansin, putative	-2.5	-1.93333	-1.3	-1.36667
AT5G41900	expressed protein	-2.36667	-2.5	-1.3	-1.36667
AT1G14280	putative APG protein	-2.46667	-2.93333	-1.3	-3.73333
AT1G53885	putative protein	-1.93333	-1.1	-1.3	-3.9
AT1G34640	PsbQ domain protein family, putative	-1.36667	-1.8	-1.3	-3.96667
AT1G65010	purple acid phosphatase, putative	-1.6	-2.23333	-1.3	-4.06667
AT2G36050	3-isopropylmalate dehydratase-like protein (small subunit)	-1.46667	-1.26667	-1.3	-4.5
AT1G12090	putative protein	-1.63333	-1.56667	-1.3	-4.73333
AT1G62660	L-ascorbate oxidase, putative	-1.5	-1.53333	-1.3	-5.16667
AT1G62560	CYP79F1/CYP79F2 cytochrome P450, aliphatic glucosinolate biosynthesis	-1.63333	-2	-1.3	-5.16667
AT2G28950	SAUR-16 small auxin up-regulated RNA putative auxin-induced protein	-4	-2.76667	-1.3	-6.03333
AT1G51090	unknown protein	-0.9	-5.46667	-1.33333	1.16667		-1.57889
AT2G42540	putative protein	-1.23333	-2.4	-1.33333	-4.33333		-1.57199
AT1G12900	cytochrome p450 family	-1.6	-0.733333	-1.33333	-3.66667		-1.25638
AT4G34760	beta tubulin 1, putative	-2.43333	-2.16667	-1.33333	-2.26667
AT4G12030	bHLH protein	-1.96667	-2.66667	-1.33333	-2.66667
AT3G16430	hydrolase-like protein	-1.4	-2.46667	-1.33333	-3.4
AT1G71695	oxygen-evolving complex 25.6 kD protein, chloroplast precursor, putative	-1.86667	-2	-1.33333	-3.76667
AT1G03310	putative protein	-1.76667	-1.6	-1.33333	-4.73333
AT2G29310	putative serine carboxypeptidase I	-1.53333	-1.9	-1.33333	-5.66667
AT5G01850	protein kinase, putative	1.44727	2.3511	-1.35035	1.7411
AT1G41830	putative protein	-1.56667	-3	-1.36667	-3.73333		-1.55081
AT4G33010	hypothetical protein	-0.733333	-0.866667	-1.36667	-2.3		-1.37718
AT4G33660	putative protein	-1.56667	-1.76667	-1.36667	-2.26667		-1.082
AT4G16985	CLH1/CORI1, Chlorophyllase, coronatine induced	-0.1	-1.66667	-1.36667	2.46667
AT5G64330	ethylene-responsive element - like protein	-0.8	-1.8	-1.36667	-0.466667
AT3G61550	expressed protein	-2.3	-2.4	-1.36667	-1.86667
AT4G03060	SAUR-50 small auxin up-regulated RNA, putative auxin-regulated protein	-1.66667	-1.6	-1.36667	-2.73333
AT1G78170	putative acetyltransferase	-1.43333	-2.6	-1.36667	-3.56667
AT2G39470	expressed protein	-2.1	-1.3	-1.4	-6.1		-2.03464
AT5G13730	major latex protein (MLP)-related	-1.43333	-3.56667	-1.4	-1.5		-1.1549
AT1G51940	hypothetical protein	-2.2	-2.06667	-1.4	0.6
AT1G26560	dihydrodipicolinate reductase-like protein	-1.5	-1.6	-1.4	-3.66667
AT2G10940	putative 2Fe-2S iron-sulfur cluster protein	-1.76667	-2.3	-1.43333	-5.26667		-2.63935
AT4G14890	putative protein	-0.766667	-2.6	-1.43333	2.36667
AT1G69420	putative protein with poly glutamic acid stretch	-2.2	-3.06667	-1.43333	-3.6
AT2G15050	xyloglucan endotransglycosylase, putative	-2.86667	-1.83333	-1.43333	-5.53333
AT5G62140	putative protein	-0.8	-2.23333	-1.43333	-0.733333		-1.08294
AT3G46130	expressed protein	-1.3	-1.6	-1.43333	-2.06667
AT1G10360	PsbQ domain protein family; extrinsic pII protein	-1.83333	-1.73333	-1.46667	-4.73333	-1.07823	-1.2307
AT1G03870	non-phototropic hypocotyl protein, putative	-3.33333	-3.8	-1.46667	-5.1
AT1G51400	hypothetical protein	-1.8	-2.4	-1.46667	-5.2
AT2G32690	disease resistance protein family (LRR)	-2.36667	-2	-1.46667	-7.96667
AT2G29290	Myb family transcription factor	-1.26667	-1.43333	-1.5	-5.73333		-2.10761
AT5G64380	myrosinase binding protein, putative	-0.9	-2.33333	-1.5	-0.4
AT1G17200	unknown protein	-1.8	-2.1	-1.5	-3.96667
AT2G32100	ELP Extensin Like Protein, pEARLI 1-like protein	-2.4	-2.63333	-1.5	-5.36667
AT2G37640	SAUR-6 small auxin up-regulated RNA putative auxin-regulated protein	-2.33333	-2.43333	-1.5	-6.43333
AT1G78450	SAUR-14 small auxin up-regulated RNA, auxin-induced protein - like	-1.33333	-1.46667	-1.53333	-4.23333		-2.978
AT1G20190	AOP2 2-oxoglutarate-dependent dioxygenase	-1.76667	-2.03333	-1.53333	-3.7		-2.77772
AT1G54040	xyloglucan endotransglycosylase, putative	-2.9	-3.2	-1.53333	-4.26667		-1.14631
AT3G28740	GSTF11, PAP1 induced glutathione transferase, putative	-1.63333	-1.33333	-1.53333	-3.03333
AT2G38120	GAST1-like protein	-2.96667	-2.5	-1.53333	-6.36667
AT3G28270	expressed protein	-2.56667	-3.33333	-1.56667	-3.03333		-2.56073
AT1G64680	ammonium transporter, puitative	-1.63333	-3.23333	-1.56667	-3.86667		-1.8019
AT1G66100	FKBP-type peptidyl-prolyl cis-trans isomerase, putative	-1.8	-1.8	-1.56667	-3.03333
AT2G04050	expressed protein	-2.03333	-2.3	-1.6	-4.3		1.2481
AT5G54980	bHLH protein; contains similarity to bHLH DNA-binding protein	-1.4	-2.46667	-1.6	-1.03333
AT1G79500	Expressed protein	-2.86667	-2.1	-1.6	-4.13333
AT1G19960	expressed protein	-2.3	-2.53333	-1.63333	-3.66667
AT1G26920	polyneuridine aldehyde esterase-like	-2.03333	-1.1	-1.63333	-4.4
AT2G21370	phytochrome kinase substrate 1, putative	-1.96667	-3.26667	-1.63333	-4.43333
AT5G20935	putative protein	-1	-2.16667	-1.66667	0.833333		-1.35402
AT4G17770	hypothetical protein	0.466667	0.633333	-1.66667	2.36667
AT3G28220	DNA-damage-repair/toleration protein, putative (DRT100)	-2.63333	-2.3	-1.7	-3.03333		-2.0144
AT3G28040	SAUR-64 small auxin up-regulated RNA	-2.86667	-3.26667	-1.7	-3.13333
AT2G47930	light-harvesting chlorophyll a/b binding protein	-2	-2.4	-1.7	-6
AT3G02730	SAUR-67 small auxin up-regulated RNA	-1.86667	-2.26667	-1.73333	-3.3		-1.4069
AT5G67070	putative trypsin inhibitor	-1.56667	-1.63333	-1.73333	0.0333333
AT4G17340	unknown protein	0.6	-0.733333	-1.76667	1.9
AT1G30520	germin-like protein	-2.9	-2.2	-1.8	-3.83333
AT2G44230	lipase/hydrolase, putative	-3.1	-2.86667	-1.8	-6.63333
AT2G18050	Bet v I allergen family	-2.46667	-1.53333	-1.83333	-5.4		-1.20374
AT2G04790	hypothetical protein	-1.56667	-2.03333	-1.83333	-4.36667
AT1G78995	SAUR-65 small auxin up-regulated RNA, auxin-induced protein, putative	-3.73333	-2.8	-1.83333	-4.56667
AT2G05070	proline-rich cell wall protein	-3.13333	-3.6	-1.86667	-4.26667		-1.03765
AT5G23820	hypothetical protein	-1.26667	-0.8	-1.9	-1.4	1.43874
AT1G72030	putative protein	-3.13333	-3.33333	-1.9	-3
AT1G70830	homeobox-leucine zipper protein HAT1 (HD-Zip protein 1)	-1.56667	-2.26667	-2.03333	-3.96667			-1.08305
AT1G19150	polysaccharide lyase family 1 (pectate lyase)	-2.4	-2.56667	-2.03333	-2.93333		-2.03388
AT5G57760	HPL Hyperoxide Lyase, CYP74B2, cytochrome P450	-1.3	-1.3	-2.03333	-0.966667			-1.02843
AT3G14210	hypothetical protein	-1.36667	-1.33333	-2.13333	-3.1
AT1G29500	expansin, putative	-3.7	-3.43333	-2.13333	-3.46667
AT2G04780	expressed protein	-1.43333	-2.3	-2.23333	-4.33333
AT4G37240	hypothetical protein	0.2	0.9	-2.33333	0.7
AT1G01610	expressed protein	-3.43333	-2.7	-2.36667	-3.4
AT2G22980	fructose-bisphosphate aldolase - like protein	-3.8	-4.06667	-2.36667	-6.56667
AT1G68600	SAUR-66 small auxin up-regulated RNA	-2.86667	-3.36667	-2.4	-3.9		-1.57531
AT2G14890	Expressed protein	-2.8	-1.96667	-2.56667	-6
AT2G21330	putative protein	-2.83333	-2.33333	-2.63333	-4.43333		-1.1573
AT1G58270	At14a	-2.4	-3	-4	-2.93333
